# Supplementary material for: A new calibrated strategy for the in situ U–Th–Pb dating of bastnasite by xenotime
Source: Royal Society of Chemistry journal article supplement (doi:10.1039/d2ja00233g), 2022-01-01
Supplement: d2ja00233g1.pdf [file d2ja00233g1.pdf]

### A new calibrated strategy for in-situ U–Th–Pb dating of bastnasite by Xenotime

Yanwen Tang<sup>a\*</sup>, Na Liu<sup>a,b</sup>, Jiehua Yang<sup>a</sup>, Guilherme O. Gonçalves<sup>c</sup>, Liang Liu<sup>a</sup>, Tingguang Lan<sup>a\*</sup>,  
Jianfeng Gao<sup>a</sup>, Junjie Han<sup>a</sup>

<sup>a</sup> State Key Laboratory of Ore Deposit Geochemistry, Institute of Geochemistry, Chinese Academy of Sciences, Guiyang, 550081, China

<sup>b</sup> University of Chinese Academy of Sciences, Beijing 100049, China

<sup>c</sup> Instituto de Geociências, Campus Universitário Darcy Ribeiro ICC, Universidade de Brasília, Brasília DF, Brazil

\* Corresponding author: tyw\_xt@126.com, lantingguang@126.com

#### Supplementary Information

Table S-1 Mathematical equation for U–Th–Pb data correction between standards and samples (xenotime XN01 or concordant bastnasite K-9 as the primary standard).

---

$$R_{\text{cor}}^{\text{sam}} = R_{\text{mea}}^{\text{sam}} * R_{\text{ref}}^{\text{std}} * \left\{ 1/R_{\text{mea1}}^{\text{std}} * \left[ 1 - (t_{\text{mea1}}^{\text{sam}} - t_{\text{mea1}}^{\text{std}}) / (t_{\text{mea2}}^{\text{std}} - t_{\text{mea1}}^{\text{std}}) \right] + 1/R_{\text{mea2}}^{\text{std}} * (t_{\text{mea1}}^{\text{sam}} - t_{\text{mea1}}^{\text{std}}) / (t_{\text{mea2}}^{\text{std}} - t_{\text{mea1}}^{\text{std}}) \right\}$$

---

Note:  $R_{\text{mea}}^{\text{sam}}$  is the measured isotopic ratio of sample at time of  $t_{\text{mea}}^{\text{sam}}$ ,  $R_{\text{cor}}^{\text{sam}}$  is the corrected isotopic ratio of the sample,  $R_{\text{ref}}^{\text{std}}$  is the reference isotopic ratio of the primary standard, and  $R_{\text{mea1}}^{\text{std}}$  and  $R_{\text{mea2}}^{\text{std}}$  are the measured isotopic ratios of primary standard at times of  $t_{\text{mea1}}^{\text{std}}$  and  $t_{\text{mea2}}^{\text{std}}$ , respectively.

---

U–Pb and Th–Pb isotopic ratios are corrected with standard-sample bracketing method. Xenotime XN01 or concordant bastnasite K-9 was used as external standard, which was analyzed three times every 10 or 15 analyses of bastnasite samples (i.e. 2 NIST612 + 3 XN01 + 10~15 samples (K-9 or other bastnasite samples) + 3 XN01 + 2 NIST612 or 2 NIST612 + 3 XN01 + 3 K-9 + 10~15 samples + 3 XN01 + 3 K-9 + 2 NIST612). A short integrating time (~25 s) of external standard and samples were selected to correct the Pb/U and Pb/Th fractionation and instrumental mass discrimination using ICPMSDataCal software. The U–Pb and Th–Pb isotopic ratios of samples were calculated using a linear interpolation (with time) for every ten or fifteen analyses according to the variations of standard. Similar description of mathematical equation and the uncertainty calculation can

be found in Luo et al.<sup>17, 25</sup>, Tang et al.<sup>30</sup> and Liu et al.<sup>35</sup>.

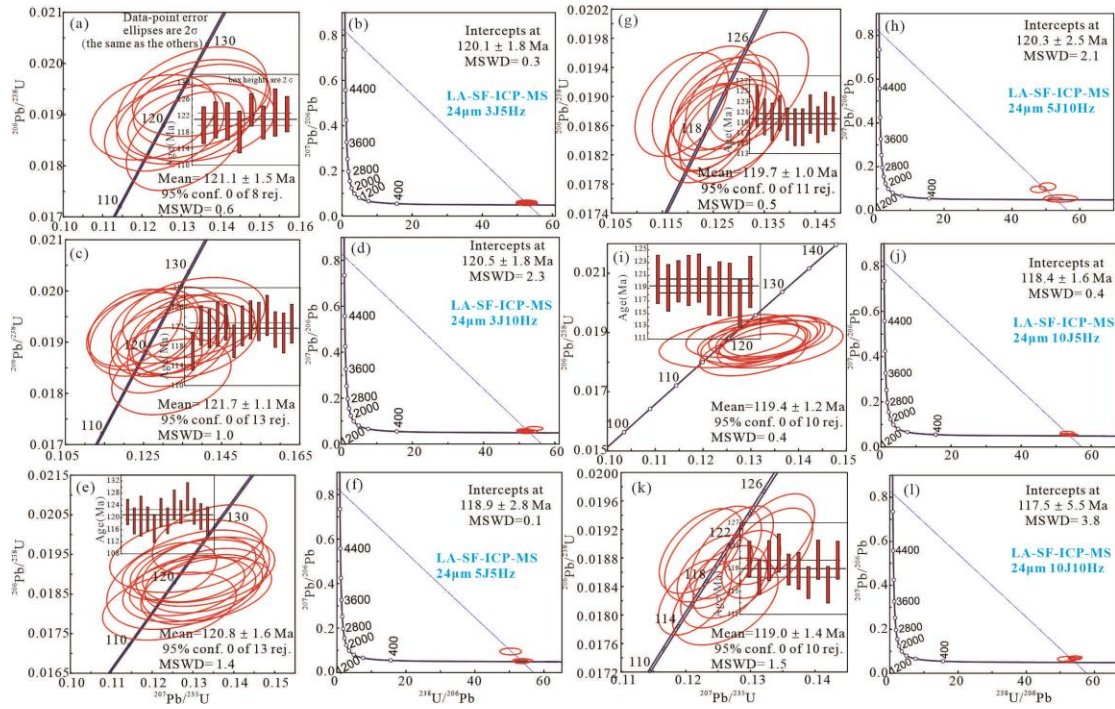

**Figure S-1** *In-situ* U–Pb ages of bastnasite K-9 calibrated by xenotime XN01 using a spot size of 24  $\mu\text{m}$  and without adding nitrogen.

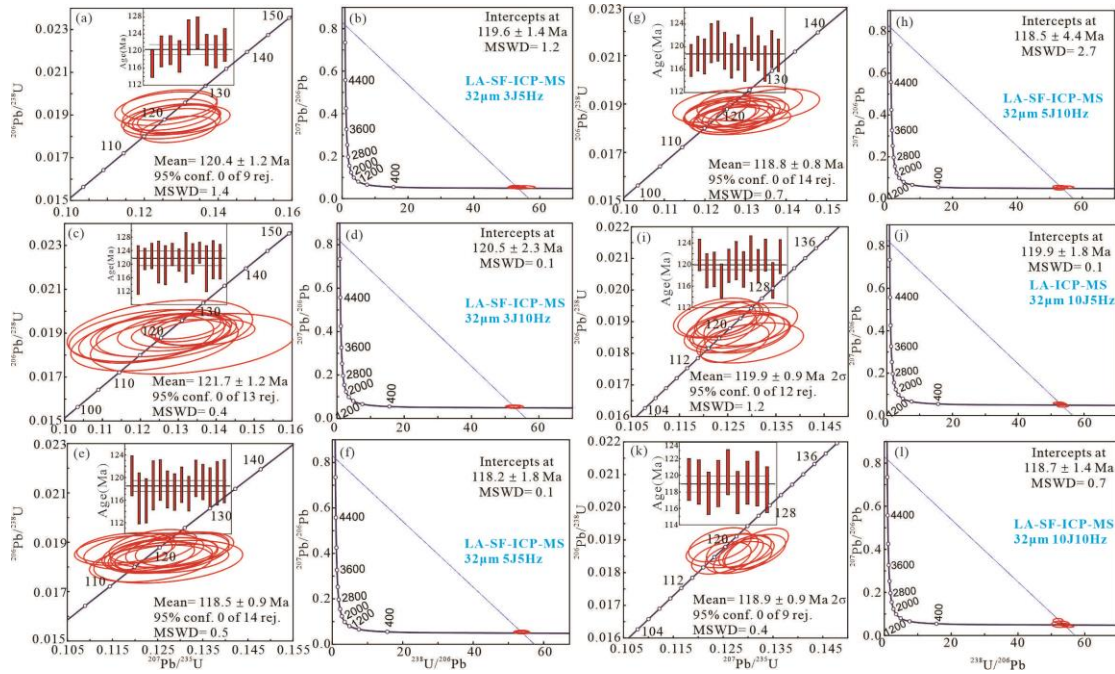

**Figure S-2** *In-situ* U–Pb ages of bastnasite K-9 calibrated by xenotime XN01 using a spot size of 32  $\mu\text{m}$  and without adding nitrogen.

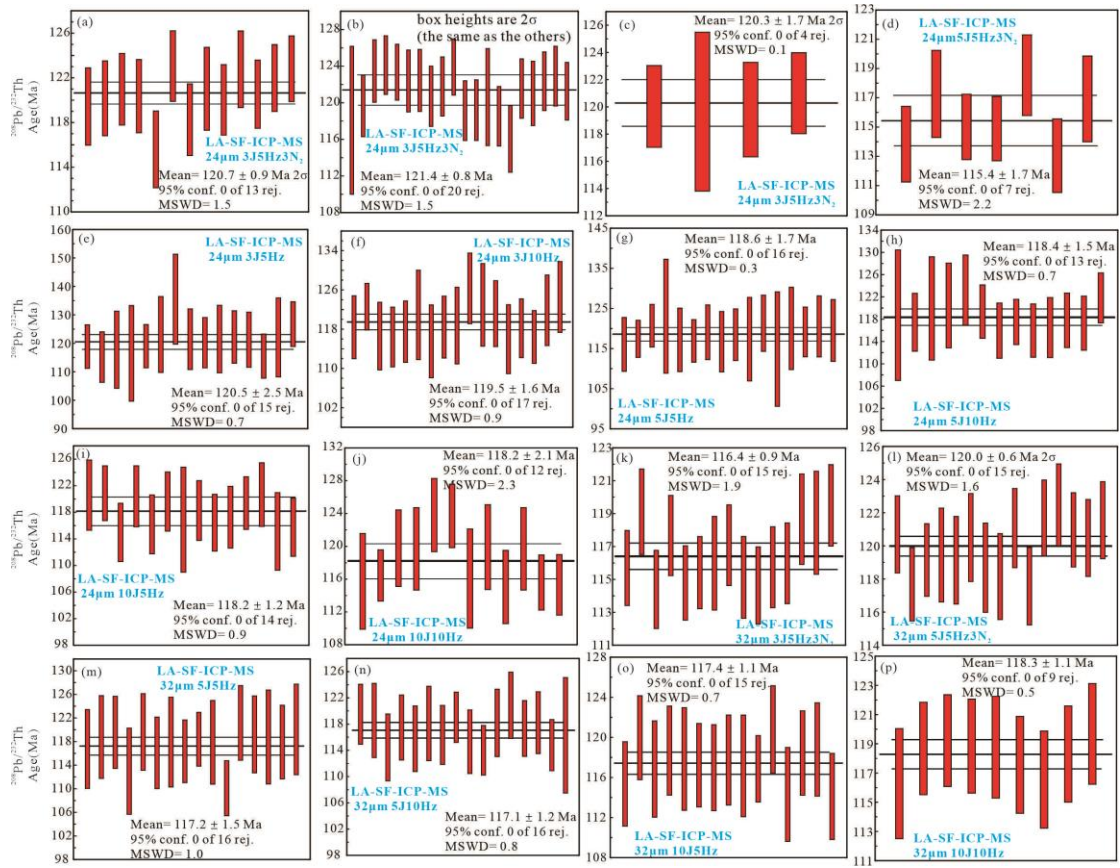

Figure S-3 *In-situ* Th–Pb ages of bastnasite K-9 calibrated by xenotime XN01.

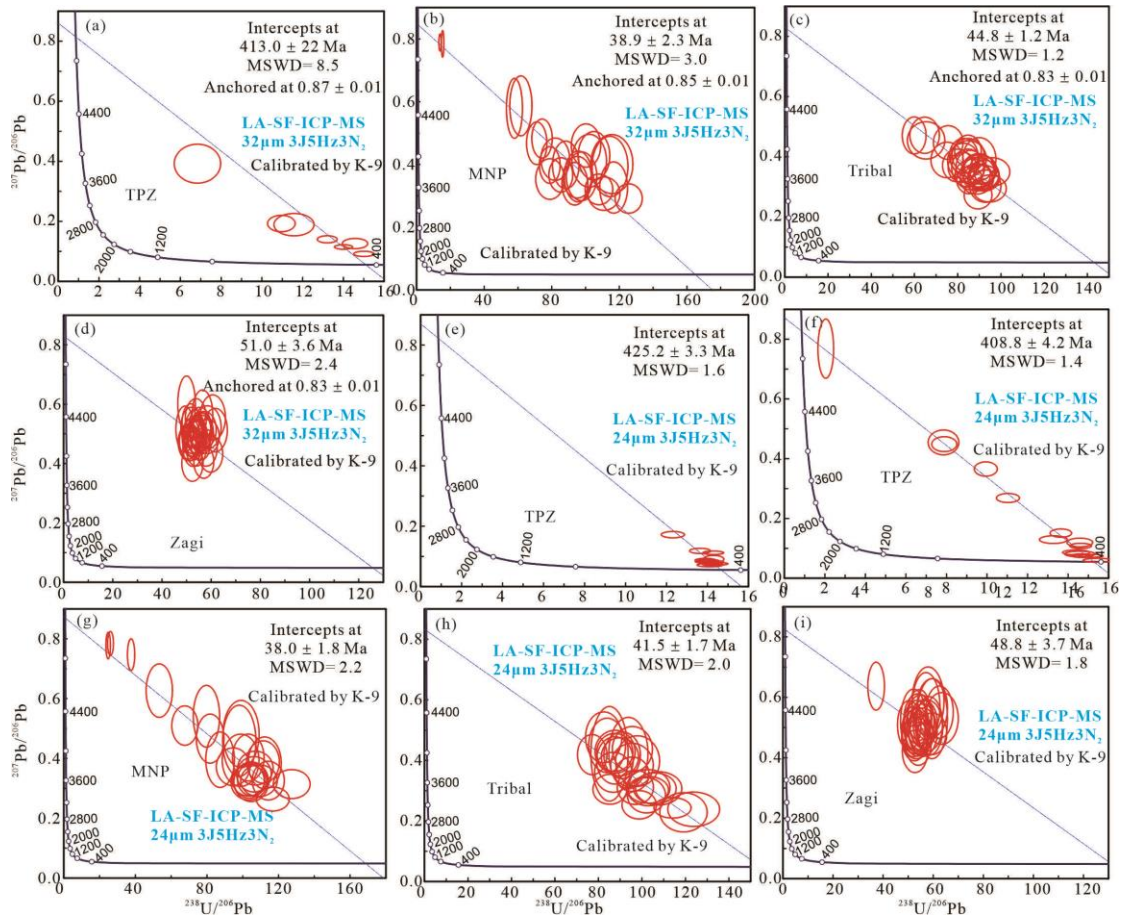

**Figure S-4** *In-situ* U-Pb ages of four typical bastnasite samples using K-9 as primary standard in three normal ablation settings by LA-SF-ICP-MS.

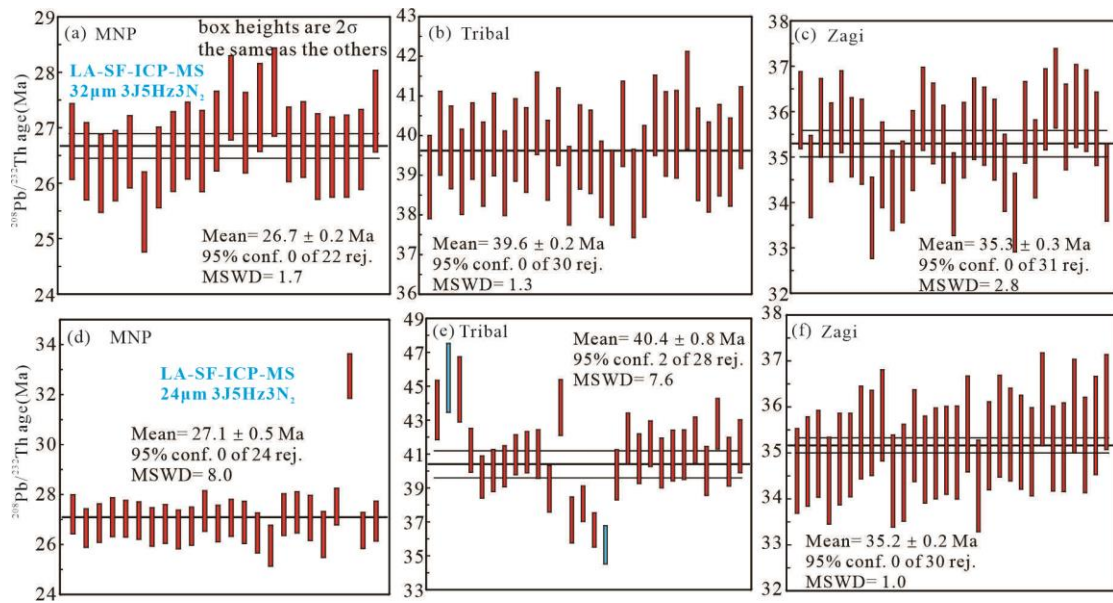

**Figure S-5** *In-situ* Th-Pb ages of four typical bastnasite samples using K-9 as the primary standard in three normal ablation settings by LA-SF-ICP-MS

Table S-2 K-9 calibrated by XN01

| Analysis date | Final U-Pb ages (Ma) <sup>a</sup> |      | Concentration <sup>b</sup> |    |        | Th/U  | Data for Tera-Wasserburg plot <sup>c</sup> |                 |             |                 |            |        | Data for Wetherill plot <sup>c</sup> |        |        |                 |      | 208Pb/232Th <sup>c</sup> |        | 207Pb/206Pb |          | 207Pb/2 |
|---------------|-----------------------------------|------|----------------------------|----|--------|-------|--------------------------------------------|-----------------|-------------|-----------------|------------|--------|--------------------------------------|--------|--------|-----------------|------|--------------------------|--------|-------------|----------|---------|
|               |                                   |      | Pb                         | Th | U      |       | 238U/206Pb                                 |                 | 207Pb/206Pb |                 | 207Pb/235U |        | 206Pb/238U                           |        |        | Ratio           | 2σ   | Age (Ma)                 | 2σ     | Age (Ma)    |          |         |
|               |                                   |      | ppm                        |    |        |       | Ratio                                      | 2σ <sup>*</sup> | Ratio       | 2σ <sup>*</sup> | 2σ         | Ratio  | 2σ <sup>*</sup>                      | 2σ     | Ratio  | 2σ <sup>*</sup> | 2σ   | rho                      | Ratio  | 2σ          | Age (Ma) | 2σ      |
| 16μm3J5Hz3N2  |                                   |      |                            |    |        |       |                                            |                 |             |                 |            |        |                                      |        |        |                 |      |                          |        |             |          |         |
| 20304D10      | 116.3                             | T-W  |                            |    | 1729.3 | 52.96 | 1.16                                       | 0.0625          | 0.0024      | 0.0022          | 0.1623     | 0.0059 | 0.0054                               | 0.0189 | 0.0004 | 0.0003          | 0.48 |                          | 700.0  | 75.9        | 152.8    |         |
| 20304D11      | 116.3                             | T-W  |                            |    | 1747.0 | 53.65 | 1.31                                       | 0.0515          | 0.0017      | 0.0015          | 0.1323     | 0.0047 | 0.0043                               | 0.0186 | 0.0005 | 0.0004          | 0.59 |                          | 264.9  | 64.8        | 126.1    |         |
| 20304D12      | 116.3                             | T-W  |                            |    | 1751.6 | 53.51 | 1.08                                       | 0.0705          | 0.0039      | 0.0037          | 0.1846     | 0.0103 | 0.0099                               | 0.0187 | 0.0004 | 0.0002          | 0.24 |                          | 942.6  | 108.2       | 172.0    |         |
| 20304D13      | 116.3                             | T-W  |                            |    | 1710.4 | 54.36 | 1.06                                       | 0.0529          | 0.0014      | 0.0012          | 0.1341     | 0.0039 | 0.0033                               | 0.0184 | 0.0004 | 0.0002          | 0.49 |                          | 324.1  | 51.8        | 127.7    |         |
| 20304D14      | 116.3                             | T-W  |                            |    | 1257.3 | 53.18 | 1.21                                       | 0.0707          | 0.0031      | 0.0029          | 0.1830     | 0.0090 | 0.0085                               | 0.0188 | 0.0004 | 0.0003          | 0.36 |                          | 950.0  | 85.2        | 170.6    |         |
| 20304D19      | 116.3                             | T-W  |                            |    | 1575.1 | 51.43 | 1.13                                       | 0.0990          | 0.0043      | 0.0040          | 0.2661     | 0.0121 | 0.0114                               | 0.0194 | 0.0004 | 0.0003          | 0.37 |                          | 1605.9 | 75.5        | 239.6    |         |
| 20304D21      | 116.3                             | T-W  |                            |    | 1708.6 | 53.96 | 1.21                                       | 0.0529          | 0.0019      | 0.0017          | 0.1344     | 0.0052 | 0.0047                               | 0.0185 | 0.0004 | 0.0003          | 0.46 |                          | 324.1  | 69.4        | 128.1    |         |
| 20304D23      | 116.3                             | T-W  |                            |    | 1103.9 | 53.70 | 1.15                                       | 0.0611          | 0.0021      | 0.0018          | 0.1567     | 0.0058 | 0.0053                               | 0.0186 | 0.0004 | 0.0003          | 0.45 |                          | 642.6  | 64.8        | 147.8    |         |
| 20304D24      | 116.3                             | T-W  |                            |    | 1167.4 | 55.52 | 1.20                                       | 0.0617          | 0.0023      | 0.0021          | 0.1517     | 0.0055 | 0.0049                               | 0.0180 | 0.0004 | 0.0003          | 0.47 |                          | 661.1  | 72.2        | 143.4    |         |
| 20304D26      | 116.3                             | T-W  |                            |    | 1220.9 | 54.12 | 1.44                                       | 0.0562          | 0.0021      | 0.0019          | 0.1428     | 0.0052 | 0.0048                               | 0.0185 | 0.0005 | 0.0004          | 0.66 |                          | 461.2  | 108.3       | 135.5    |         |
| 20304D27      | 116.3                             | T-W  |                            |    | 1308.7 | 55.00 | 1.44                                       | 0.0556          | 0.0017      | 0.0014          | 0.1391     | 0.0049 | 0.0044                               | 0.0182 | 0.0005 | 0.0004          | 0.67 |                          | 435.2  | 62.0        | 132.3    |         |
| 20304D28      | 116.3                             | T-W  |                            |    | 1226.2 | 54.67 | 1.55                                       | 0.0502          | 0.0017      | 0.0015          | 0.1266     | 0.0049 | 0.0045                               | 0.0183 | 0.0005 | 0.0004          | 0.68 |                          | 211.2  | 70.4        | 121.1    |         |
| 20304D5       | 116.3                             | T-W  |                            |    | 1597.1 | 54.34 | 1.43                                       | 0.0689          | 0.0034      | 0.0033          | 0.1774     | 0.0080 | 0.0075                               | 0.0184 | 0.0005 | 0.0004          | 0.51 |                          | 1000.0 | 100.0       | 165.9    |         |
| 20304D7       | 116.3                             | T-W  |                            |    | 1655.0 | 54.31 | 1.25                                       | 0.0741          | 0.0024      | 0.0021          | 0.1888     | 0.0061 | 0.0054                               | 0.0184 | 0.0004 | 0.0003          | 0.61 |                          | 1061.1 | 52.8        | 175.6    |         |
| 20304D8       | 116.3                             | T-W  |                            |    | 1645.0 | 54.69 | 1.29                                       | 0.0552          | 0.0018      | 0.0016          | 0.1401     | 0.0057 | 0.0053                               | 0.0183 | 0.0004 | 0.0003          | 0.48 |                          | 431.5  | 64.8        | 133.2    |         |
| 20304D20      | 116.6                             | Mean |                            |    | 1678.9 | 54.08 | 1.51                                       | 0.0487          | 0.0017      | 0.0015          | 0.1235     | 0.0044 | 0.0040                               | 0.0185 | 0.0005 | 0.0004          | 0.73 |                          | 131.6  | 76.8        | 118.3    |         |
| 20304D25      | 116.6                             | Mean |                            |    | 897.8  | 54.98 | 1.23                                       | 0.0495          | 0.0018      | 0.0017          | 0.1242     | 0.0047 | 0.0043                               | 0.0182 | 0.0004 | 0.0003          | 0.48 |                          | 172.3  | 75.0        | 118.9    |         |
| 20304D29      | 116.6                             | Mean |                            |    | 1187.7 | 55.55 | 1.30                                       | 0.0495          | 0.0015      | 0.0013          | 0.1227     | 0.0042 | 0.0037                               | 0.0180 | 0.0004 | 0.0003          | 0.58 |                          | 172.3  | 61.1        | 117.5    |         |
| 20304D6       | 116.6                             | Mean |                            |    | 1604.9 | 54.72 | 1.15                                       | 0.0496          | 0.0017      | 0.0015          | 0.1240     | 0.0037 | 0.0031                               | 0.0183 | 0.0004 | 0.0003          | 0.56 |                          | 172.3  | 72.2        | 118.7    |         |
| 20304D9       | 116.6                             | Mean |                            |    | 1618.2 | 54.46 | 1.16                                       | 0.0486          | 0.0016      | 0.0014          | 0.1233     | 0.0040 | 0.0036                               | 0.0184 | 0.0004 | 0.0003          | 0.51 |                          | 131.6  | 68.5        | 118.1    |         |
| 16μm3J10Hz3N2 |                                   |      |                            |    |        |       |                                            |                 |             |                 |            |        |                                      |        |        |                 |      |                          |        |             |          |         |
| 20306B19      | 118.2                             | T-W  |                            |    | 1045.5 | 50.16 | 1.36                                       | 0.1487          | 0.0075      | 0.0072          | 0.3731     | 0.0153 | 0.0142                               | 0.0199 | 0.0005 | 0.0004          | 0.59 |                          | 2175.9 | 64.7        | 321.9    |         |
| 20306B9       | 118.2                             | T-W  |                            |    | 1416.1 | 49.20 | 1.47                                       | 0.1231          | 0.0086      | 0.0084          | 0.3235     | 0.0148 | 0.0140                               | 0.0203 | 0.0006 | 0.0005          | 0.59 |                          | 1900.0 | 73.5        | 284.6    |         |
| 20306B13      | 118.2                             | T-W  |                            |    | 726.9  | 50.32 | 1.66                                       | 0.1066          | 0.0081      | 0.0080          | 0.2874     | 0.0260 | 0.0256                               | 0.0199 | 0.0007 | 0.0006          | 0.33 |                          | 1681.2 | 135.8       | 256.5    |         |
| 20306B12      | 118.2                             | T-W  |                            |    | 2022.0 | 53.27 | 1.90                                       | 0.0798          | 0.0042      | 0.0041          | 0.2115     | 0.0141 | 0.0137                               | 0.0188 | 0.0007 | 0.0006          | 0.50 |                          | 1184.9 | 105.6       | 194.8    |         |
| 20306B6       | 118.2                             | T-W  |                            |    | 1918.2 | 54.72 | 1.85                                       | 0.0746          | 0.0028      | 0.0026          | 0.1932     | 0.0093 | 0.0088                               | 0.0183 | 0.0006 | 0.0006          | 0.66 |                          | 1061.1 | 83.3        | 179.3    |         |
| 20306B7       | 118.2                             | T-W  |                            |    | 1827.3 | 53.68 | 1.76                                       | 0.0698          | 0.0041      | 0.0040          | 0.1724     | 0.0082 | 0.0077                               | 0.0186 | 0.0006 | 0.0005          | 0.64 |                          | 831.5  | 67.6        | 161.5    |         |
| 20306B15      | 118.2                             | T-W  |                            |    | 1198.0 | 53.09 | 1.61                                       | 0.0617          | 0.0041      | 0.0040          | 0.1620     | 0.0064 | 0.0059                               | 0.0188 | 0.0006 | 0.0005          | 0.72 |                          | 687.1  | 64.8        | 152.5    |         |

| Analysis date | Final U-Pb ages (Ma) <sup>a</sup> |           | Concentration <sup>b</sup> |    |        | Th/U  | Data for Tera-Wasserburg plot <sup>c</sup> |        |             |        |        |            | Data for Wetherill plot <sup>c</sup> |        |            |        | 208Pb/232Th <sup>c</sup> |     | 207Pb/206Pb |        | 207Pb/2  |       |          |
|---------------|-----------------------------------|-----------|----------------------------|----|--------|-------|--------------------------------------------|--------|-------------|--------|--------|------------|--------------------------------------|--------|------------|--------|--------------------------|-----|-------------|--------|----------|-------|----------|
|               |                                   |           | Pb                         | Th | U      |       | 238U/206Pb                                 |        | 207Pb/206Pb |        |        | 207Pb/235U |                                      |        | 206Pb/238U |        |                          |     | Ratio       | 2σ     | Age (Ma) | 2σ    | Age (Ma) |
|               |                                   |           | ppm                        |    |        |       | Ratio                                      | 2σ*    | Ratio       | 2σ*    | 2σ     | Ratio      | 2σ*                                  | 2σ     | Ratio      | 2σ*    | 2σ                       | rho | Ratio       | 2σ     | Age (Ma) | 2σ    | Age (Ma) |
| 20306B28      | 118.2                             | T-W       |                            |    | 1150.8 | 52.11 | 1.89                                       | 0.0627 | 0.0021      | 0.0018 | 0.1660 | 0.0143     | 0.0141                               | 0.0192 | 0.0007     | 0.0006 | 0.39                     |     |             | 733.3  | 337.9    | 155.9 |          |
| 20306B23      | 118.2                             | T-W       |                            |    | 2079.9 | 53.37 | 1.73                                       | 0.0621 | 0.0017      | 0.0014 | 0.1589 | 0.0062     | 0.0057                               | 0.0187 | 0.0006     | 0.0005 | 0.80                     |     |             | 661.1  | 55.7     | 149.7 |          |
| 20306B24      | 118.2                             | T-W       |                            |    | 1808.9 | 52.91 | 1.57                                       | 0.0620 | 0.0024      | 0.0022 | 0.1548 | 0.0058     | 0.0053                               | 0.0189 | 0.0006     | 0.0005 | 0.74                     |     |             | 587.1  | 75.9     | 146.1 |          |
| 20306B25      | 118.2                             | T-W       |                            |    | 2662.5 | 51.11 | 1.64                                       | 0.0604 | 0.0018      | 0.0016 | 0.1605 | 0.0060     | 0.0054                               | 0.0196 | 0.0006     | 0.0006 | 0.83                     |     |             | 594.5  | 64.8     | 151.1 |          |
| 20306B5       | 118.2                             | T-W       |                            |    | 1923.4 | 53.70 | 2.04                                       | 0.0573 | 0.0024      | 0.0022 | 0.1498 | 0.0085     | 0.0082                               | 0.0186 | 0.0007     | 0.0006 | 0.63                     |     |             | 487.1  | 92.6     | 141.7 |          |
| 20306B11      | 118.2                             | T-W       |                            |    | 2336.8 | 52.73 | 1.73                                       | 0.0571 | 0.0016      | 0.0014 | 0.1453 | 0.0049     | 0.0043                               | 0.0190 | 0.0006     | 0.0006 | 0.97                     |     |             | 442.6  | 10.2     | 137.7 |          |
| 20306B14      | 118.2                             | T-W       |                            |    | 1220.2 | 52.33 | 1.88                                       | 0.0544 | 0.0017      | 0.0015 | 0.1409 | 0.0064     | 0.0060                               | 0.0191 | 0.0007     | 0.0006 | 0.76                     |     |             | 338.9  | 77.8     | 133.9 |          |
| 20306B10      | 118.2                             | T-W       |                            |    | 2045.5 | 52.53 | 1.74                                       | 0.0539 | 0.0013      | 0.0010 | 0.1394 | 0.0049     | 0.0044                               | 0.0190 | 0.0006     | 0.0006 | 0.94                     |     |             | 342.7  | 48.1     | 132.5 |          |
| 20306B22      | 118.2                             | T-W       |                            |    | 1098.6 | 51.96 | 1.89                                       | 0.0515 | 0.0016      | 0.0014 | 0.1384 | 0.0062     | 0.0059                               | 0.0192 | 0.0007     | 0.0006 | 0.78                     |     |             | 283.4  | 56.5     | 131.6 |          |
| 20306B8       | 118.2                             | T-W       |                            |    | 2008.7 | 54.49 | 2.12                                       | 0.0515 | 0.0021      | 0.0020 | 0.1279 | 0.0058     | 0.0054                               | 0.0184 | 0.0007     | 0.0007 | 0.84                     |     |             | 216.7  | 52.8     | 122.2 |          |
| 20306B26      | 118.2                             | T-W       |                            |    | 2185.8 | 53.08 | 2.01                                       | 0.0514 | 0.0014      | 0.0011 | 0.1304 | 0.0053     | 0.0049                               | 0.0188 | 0.0007     | 0.0007 | 0.91                     |     |             | 216.7  | 66.7     | 124.5 |          |
| 20306B21      | 118.2, 119.1                      | Mean, T-W |                            |    | 1271.4 | 54.52 | 1.74                                       | 0.0502 | 0.0015      | 0.0013 | 0.1244 | 0.0051     | 0.0047                               | 0.0183 | 0.0006     | 0.0005 | 0.74                     |     |             | 164.9  | 74.1     | 119.1 |          |
| 20306B27      | 118.2, 119.1                      | Mean, T-W |                            |    | 2460.0 | 53.88 | 1.79                                       | 0.0490 | 0.0012      | 0.0010 | 0.1252 | 0.0046     | 0.0042                               | 0.0186 | 0.0006     | 0.0005 | 0.88                     |     |             | 146.4  | 46.3     | 119.8 |          |
| 20306B20      | 118.2, 119.1                      | Mean, T-W |                            |    | 1291.6 | 52.09 | 1.86                                       | 0.0486 | 0.0016      | 0.0015 | 0.1284 | 0.0056     | 0.0053                               | 0.0192 | 0.0007     | 0.0006 | 0.79                     |     |             | 200.1  | 74.1     | 122.7 |          |
| 16μm5J5Hz3N2  |                                   |           |                            |    |        |       |                                            |        |             |        |        |            |                                      |        |            |        |                          |     |             |        |          |       |          |
| 20306C21      | 117.5                             | T-W       |                            |    | 847.6  | 47.66 | 1.16                                       | 0.1506 | 0.0085      | 0.0082 | 0.4431 | 0.0215     | 0.0205                               | 0.0210 | 0.0005     | 0.0004 | 0.41                     |     |             | 2353.4 | 93.2     | 372.5 |          |
| 20306C22      | 117.5                             | T-W       |                            |    | 852.9  | 48.69 | 1.17                                       | 0.1508 | 0.0074      | 0.0070 | 0.4318 | 0.0244     | 0.0235                               | 0.0205 | 0.0005     | 0.0004 | 0.34                     |     |             | 2355.3 | 79.6     | 364.4 |          |
| 20306C11      | 117.5                             | T-W       |                            |    | 942.4  | 51.58 | 1.13                                       | 0.0887 | 0.0052      | 0.0050 | 0.2406 | 0.0134     | 0.0129                               | 0.0194 | 0.0004     | 0.0003 | 0.29                     |     |             | 1398.5 | 108.2    | 218.9 |          |
| 20306C7       | 117.5                             | T-W       |                            |    | 616.8  | 52.02 | 1.28                                       | 0.0551 | 0.0024      | 0.0022 | 0.1460 | 0.0057     | 0.0053                               | 0.0192 | 0.0005     | 0.0004 | 0.53                     |     |             | 416.7  | 90.7     | 138.4 |          |
| 20306C28      | 117.5                             | T-W       |                            |    | 1090.3 | 52.49 | 1.71                                       | 0.0698 | 0.0031      | 0.0029 | 0.1843 | 0.0102     | 0.0098                               | 0.0191 | 0.0006     | 0.0005 | 0.54                     |     |             | 924.1  | 86.0     | 171.7 |          |
| 20306C27      | 117.5                             | T-W       |                            |    | 1206.1 | 52.51 | 1.57                                       | 0.0497 | 0.0015      | 0.0013 | 0.1310 | 0.0054     | 0.0051                               | 0.0190 | 0.0006     | 0.0005 | 0.67                     |     |             | 183.4  | 61.1     | 125.0 |          |
| 20306C19      | 117.5                             | T-W       |                            |    | 709.2  | 52.70 | 1.40                                       | 0.0764 | 0.0052      | 0.0050 | 0.2002 | 0.0143     | 0.0139                               | 0.0190 | 0.0005     | 0.0004 | 0.31                     |     |             | 1105.6 | 131.5    | 185.3 |          |
| 20306C20      | 117.5                             | T-W       |                            |    | 976.3  | 53.00 | 1.43                                       | 0.0582 | 0.0017      | 0.0015 | 0.1515 | 0.0055     | 0.0050                               | 0.0189 | 0.0005     | 0.0004 | 0.68                     |     |             | 538.9  | 53.7     | 143.2 |          |
| 20306C24      | 117.5                             | T-W       |                            |    | 662.1  | 53.02 | 1.37                                       | 0.0781 | 0.0033      | 0.0030 | 0.2047 | 0.0085     | 0.0079                               | 0.0189 | 0.0005     | 0.0004 | 0.54                     |     |             | 1150.0 | 76.7     | 189.1 |          |
| 20306C8       | 117.5                             | T-W       |                            |    | 1132.3 | 53.04 | 1.17                                       | 0.0582 | 0.0017      | 0.0014 | 0.1514 | 0.0050     | 0.0044                               | 0.0189 | 0.0004     | 0.0003 | 0.55                     |     |             | 538.9  | 53.7     | 143.1 |          |
| 20306C5       | 117.5                             | T-W       |                            |    | 782.8  | 53.08 | 1.40                                       | 0.0556 | 0.0021      | 0.0019 | 0.1440 | 0.0057     | 0.0053                               | 0.0188 | 0.0005     | 0.0004 | 0.59                     |     |             | 435.2  | 71.3     | 136.6 |          |
| 20306C25      | 117.5                             | T-W       |                            |    | 837.4  | 53.42 | 1.39                                       | 0.0692 | 0.0029      | 0.0027 | 0.1820 | 0.0071     | 0.0066                               | 0.0187 | 0.0005     | 0.0004 | 0.58                     |     |             | 905.6  | 73.9     | 169.8 |          |
| 20306C9       | 117.5                             | T-W       |                            |    | 917.1  | 53.59 | 1.30                                       | 0.0523 | 0.0019      | 0.0017 | 0.1340 | 0.0042     | 0.0037                               | 0.0187 | 0.0005     | 0.0004 | 0.69                     |     |             | 298.2  | 69.4     | 127.7 |          |
| 20306C23      | 117.5                             | T-W       |                            |    | 1302.9 | 53.59 | 1.08                                       | 0.0758 | 0.0028      | 0.0025 | 0.1946 | 0.0056     | 0.0048                               | 0.0187 | 0.0004     | 0.0002 | 0.53                     |     |             | 1100.0 | 66.7     | 180.5 |          |

| Analysis date       | Final U-Pb ages (Ma) <sup>a</sup> |      | Concentration <sup>b</sup> |         |        | Th/U  | Data for Tera-Wasserburg plot <sup>c</sup> |              |             |              |            |            | Data for Wetherill plot <sup>c</sup> |            |            |              |            | 208Pb/232Th <sup>c</sup> |                          | 207Pb/206Pb  |             | 207Pb/2 |            |
|---------------------|-----------------------------------|------|----------------------------|---------|--------|-------|--------------------------------------------|--------------|-------------|--------------|------------|------------|--------------------------------------|------------|------------|--------------|------------|--------------------------|--------------------------|--------------|-------------|---------|------------|
|                     |                                   |      | Pb                         | Th      | U      |       | 238U/206Pb                                 |              | 207Pb/206Pb |              |            | 207Pb/235U |                                      |            | 206Pb/238U |              |            | rho                      | 208Pb/232Th <sup>c</sup> |              | 207Pb/206Pb |         | 207Pb/2    |
|                     |                                   |      | ppm                        |         |        |       | Ratio                                      | 2 $\sigma^*$ | Ratio       | 2 $\sigma^*$ | 2 $\sigma$ | Ratio      | 2 $\sigma^*$                         | 2 $\sigma$ | Ratio      | 2 $\sigma^*$ | 2 $\sigma$ |                          | Ratio                    | 2 $\sigma^*$ | 2 $\sigma$  | Ratio   | 2 $\sigma$ |
| 20306C14            | 117.5                             | T-W  |                            |         | 1021.1 | 53.71 | 1.92                                       | 0.0552       | 0.0027      | 0.0026       | 0.1425     | 0.0062     | 0.0058                               | 0.0186     | 0.0007     | 0.0006       | 0.80       |                          |                          | 420.4        | 99.1        | 135.3   |            |
| 20306C30            | 117.5                             | T-W  |                            |         | 1402.1 | 54.14 | 1.18                                       | 0.0598       | 0.0017      | 0.0014       | 0.1517     | 0.0041     | 0.0034                               | 0.0185     | 0.0004     | 0.0003       | 0.69       |                          |                          | 594.5        | 56.5        | 143.4   |            |
| 20306C12            | 117.5                             | T-W  |                            |         | 1303.4 | 54.55 | 1.19                                       | 0.0538       | 0.0017      | 0.0014       | 0.1350     | 0.0036     | 0.0030                               | 0.0183     | 0.0004     | 0.0003       | 0.71       |                          |                          | 361.2        | 61.1        | 128.6   |            |
| 20306C29            | 117.5                             | T-W  |                            |         | 1533.7 | 54.90 | 1.47                                       | 0.0504       | 0.0015      | 0.0013       | 0.1261     | 0.0040     | 0.0035                               | 0.0182     | 0.0005     | 0.0004       | 0.79       |                          |                          | 213.0        | 61.1        | 120.6   |            |
| 16 $\mu$ m5J10Hz3N2 |                                   |      |                            |         |        |       |                                            |              |             |              |            |            |                                      |            |            |              |            |                          |                          |              |             |         |            |
| 20306D12            | 114.1                             | T-W  |                            |         | 1222.3 | 50.02 | 1.74                                       | 0.1389       | 0.0113      | 0.0111       | 0.4167     | 0.0418     | 0.0413                               | 0.0200     | 0.0007     | 0.0006       | 0.32       |                          |                          | 2213.3       | 134.1       | 353.7   |            |
| 20306D29            | 114.1                             | T-W  |                            |         | 784.7  | 52.72 | 1.86                                       | 0.0914       | 0.0050      | 0.0048       | 0.2432     | 0.0138     | 0.0133                               | 0.0190     | 0.0007     | 0.0006       | 0.58       |                          |                          | 1454.6       | 101.9       | 221.1   |            |
| 20306D28            | 114.1                             | T-W  |                            |         | 662.9  | 52.86 | 1.56                                       | 0.0944       | 0.0044      | 0.0042       | 0.2460     | 0.0115     | 0.0108                               | 0.0189     | 0.0006     | 0.0005       | 0.57       |                          |                          | 1516.7       | 83.3        | 223.3   |            |
| 20306D30            | 114.1                             | T-W  |                            |         | 701.6  | 52.90 | 1.70                                       | 0.0751       | 0.0038      | 0.0036       | 0.1968     | 0.0111     | 0.0107                               | 0.0189     | 0.0006     | 0.0005       | 0.52       |                          |                          | 1072.2       | 96.8        | 182.4   |            |
| 20306D32            | 114.1                             | T-W  |                            |         | 1007.4 | 54.38 | 1.65                                       | 0.0695       | 0.0021      | 0.0018       | 0.1761     | 0.0066     | 0.0060                               | 0.0184     | 0.0006     | 0.0005       | 0.76       |                          |                          | 914.5        | 53.7        | 164.7   |            |
| 20306D19            | 114.1                             | T-W  |                            |         | 1574.4 | 54.45 | 1.76                                       | 0.0641       | 0.0017      | 0.0014       | 0.1622     | 0.0056     | 0.0050                               | 0.0184     | 0.0006     | 0.0005       | 0.92       |                          |                          | 746.3        | 45.5        | 152.6   |            |
| 20306D24            | 114.1                             | T-W  |                            |         | 1251.2 | 54.93 | 1.73                                       | 0.0581       | 0.0034      | 0.0033       | 0.1460     | 0.0076     | 0.0073                               | 0.0182     | 0.0006     | 0.0005       | 0.56       |                          |                          | 531.5        | 91.7        | 138.4   |            |
| 20306D21            | 114.1                             | T-W  |                            |         | 1034.6 | 55.31 | 1.73                                       | 0.0596       | 0.0024      | 0.0022       | 0.1502     | 0.0063     | 0.0058                               | 0.0181     | 0.0006     | 0.0005       | 0.70       |                          |                          | 590.8        | 78.5        | 142.1   |            |
| 20306D5             | 114.1                             | T-W  |                            |         | 1449.1 | 55.34 | 1.54                                       | 0.0597       | 0.0023      | 0.0021       | 0.1484     | 0.0062     | 0.0057                               | 0.0181     | 0.0005     | 0.0004       | 0.60       |                          |                          | 590.8        | 71.3        | 140.5   |            |
| 20306D8             | 114.1                             | T-W  |                            |         | 2219.6 | 55.93 | 1.65                                       | 0.0645       | 0.0020      | 0.0018       | 0.1587     | 0.0059     | 0.0053                               | 0.0179     | 0.0005     | 0.0005       | 0.75       |                          |                          | 766.7        | 57.4        | 149.6   |            |
| 24 $\mu$ m3J5Hz3N2  |                                   |      |                            |         |        |       |                                            |              |             |              |            |            |                                      |            |            |              |            |                          |                          |              |             |         |            |
| 20102a5             | 118.6                             | Mean | 190                        | 36696.1 | 726.7  | 50.5  | 54.71                                      | 1.66         | 0.0484      | 0.0019       | 0.0017     | 0.1214     | 0.0049                               | 0.0045     | 0.0183     | 0.0006       | 0.0005     | 0.71                     | 0.0059                   | 0.0001       | 116.8       | 83.3    | 116.4      |
| 20102a6             | 118.6                             | Mean | 212                        | 40138.4 | 881.9  | 45.5  | 55.35                                      | 1.75         | 0.0488      | 0.0018       | 0.0017     | 0.1210     | 0.0050                               | 0.0047     | 0.0181     | 0.0006       | 0.0005     | 0.71                     | 0.0060                   | 0.0001       | 139.0       | 79.6    | 116.0      |
| 20102a7             | 118.6                             | Mean | 200                        | 36702.2 | 805.7  | 45.6  | 53.71                                      | 1.57         | 0.0482      | 0.0016       | 0.0015     | 0.1241     | 0.0051                               | 0.0048     | 0.0186     | 0.0005       | 0.0005     | 0.65                     | 0.0064                   | 0.0001       | 109.4       | 76.8    | 118.8      |
| 20102a18            |                                   |      | 27                         | 1506.6  | 1105.6 | 1.4   |                                            |              |             |              |            |            |                                      |            |            |              |            |                          |                          |              |             |         |            |
| 20102a19            |                                   |      | 19                         | 710.6   | 836.4  | 0.8   |                                            |              |             |              |            |            |                                      |            |            |              |            |                          |                          |              |             |         |            |
| 20102a20            |                                   |      | 32                         | 2039.2  | 1400.2 | 1.5   |                                            |              |             |              |            |            |                                      |            |            |              |            |                          |                          |              |             |         |            |
| 20102a29            | 118.6                             | Mean | 36                         | 1433.3  | 1604.3 | 0.9   | 53.85                                      | 1.47         | 0.0482      | 0.0013       | 0.0011     | 0.1234     | 0.0043                               | 0.0039     | 0.0186     | 0.0005       | 0.0004     | 0.73                     | 0.0063                   | 0.0002       | 109.4       | 53.7    | 118.1      |
| 20102a30            | 118.6                             | Mean | 28                         | 669.6   | 1374.8 | 0.5   | 53.65                                      | 1.47         | 0.0489      | 0.0014       | 0.0012     | 0.1255     | 0.0045                               | 0.0041     | 0.0186     | 0.0005       | 0.0004     | 0.70                     | 0.0065                   | 0.0002       | 142.7       | 57.4    | 120.1      |
| 20102a31            | 118.6                             | Mean | 40                         | 5078.9  | 867.4  | 5.9   | 52.45                                      | 1.57         | 0.0485      | 0.0015       | 0.0013     | 0.1275     | 0.0046                               | 0.0042     | 0.0191     | 0.0006       | 0.0005     | 0.78                     | 0.0060                   | 0.0001       | 124.2       | 61.1    | 121.8      |
| 20102a41            | 118.6                             | Mean | 40                         | 982.9   | 2019.2 | 0.5   | 54.33                                      | 1.64         | 0.0490      | 0.0014       | 0.0011     | 0.1243     | 0.0046                               | 0.0042     | 0.0184     | 0.0006       | 0.0005     | 0.77                     | 0.0072                   | 0.0002       | 150.1       | 55.5    | 119.0      |
| 20102a42            | 118.6                             | Mean | 30                         | 762.8   | 1468.3 | 0.5   | 53.18                                      | 1.60         | 0.0493      | 0.0013       | 0.0010     | 0.1280     | 0.0048                               | 0.0043     | 0.0188     | 0.0006       | 0.0005     | 0.76                     | 0.0070                   | 0.0003       | 164.9       | 45.4    | 122.3      |
| 20102a43            | 118.6                             | Mean | 39                         | 4263.3  | 1075.3 | 4.0   | 53.13                                      | 1.75         | 0.0484      | 0.0015       | 0.0014     | 0.1253     | 0.0051                               | 0.0048     | 0.0188     | 0.0006       | 0.0005     | 0.77                     | 0.0060                   | 0.0001       | 116.8       | 69.4    | 119.9      |
| 20102a53            | 118.6                             | Mean | 31                         | 3847.1  | 717.4  | 5.4   | 54.06                                      | 1.40         | 0.0491      | 0.0019       | 0.0017     | 0.1248     | 0.0049                               | 0.0045     | 0.0185     | 0.0005       | 0.0004     | 0.58                     | 0.0057                   | 0.0001       | 153.8       | 76.8    | 119.4      |

| Analysis date | Final U-Pb ages (Ma) <sup>a</sup> |      | Concentration <sup>b</sup> |         |        | Th/U | Data for Tera-Wasserburg plot <sup>c</sup> |      |             |        |            |        | Data for Wetherill plot <sup>c</sup> |        |        |        |        |          | 208Pb/232Th <sup>c</sup> |          | 207Pb/206Pb |       | 207Pb/2  |
|---------------|-----------------------------------|------|----------------------------|---------|--------|------|--------------------------------------------|------|-------------|--------|------------|--------|--------------------------------------|--------|--------|--------|--------|----------|--------------------------|----------|-------------|-------|----------|
|               |                                   |      | Pb                         | Th      | U      |      | 238U/206Pb                                 |      | 207Pb/206Pb |        | 207Pb/235U |        | 206Pb/238U                           |        |        | Ratio  | 2σ     | Age (Ma) | 2σ                       | Age (Ma) |             |       |          |
|               |                                   |      | ppm                        |         |        |      | Ratio                                      | 2σ*  | Ratio       | 2σ*    | 2σ         | Ratio  | 2σ*                                  | 2σ     | Ratio  | 2σ*    | 2σ     | rho      | Ratio                    | 2σ       | Age (Ma)    | 2σ    | Age (Ma) |
| 20102a54      | 118.6                             | Mean | 63                         | 8027.5  | 1362.2 | 5.9  | 54.17                                      | 1.46 | 0.0489      | 0.0015 | 0.0013     | 0.1244 | 0.0042                               | 0.0038 | 0.0185 | 0.0005 | 0.0004 | 0.74     | 0.0061                   | 0.0001   | 146.4       | 63.9  | 119.0    |
| 20102a55      | 118.6                             | Mean | 58                         | 7323.8  | 1211.8 | 6.0  | 52.87                                      | 1.38 | 0.0555      | 0.0019 | 0.0018     | 0.1444 | 0.0052                               | 0.0048 | 0.0189 | 0.0005 | 0.0004 | 0.64     | 0.0059                   | 0.0001   | 435.2       | 70.4  | 137.0    |
| 20102a64      | 118.6                             | Mean | 42                         | 5429.1  | 864.5  | 6.3  | 53.89                                      | 1.48 | 0.0513      | 0.0026 | 0.0024     | 0.1317 | 0.0072                               | 0.0069 | 0.0186 | 0.0005 | 0.0004 | 0.43     | 0.0060                   | 0.0002   | 253.8       | 109.2 | 125.6    |
| 20102a65      | 118.6                             | Mean | 48                         | 5941.1  | 1114.8 | 5.3  | 54.29                                      | 1.36 | 0.0504      | 0.0016 | 0.0014     | 0.1278 | 0.0046                               | 0.0041 | 0.0184 | 0.0005 | 0.0004 | 0.61     | 0.0060                   | 0.0001   | 213.0       | 66.7  | 122.1    |
| 20102a66      | 118.6                             | Mean | 61                         | 7352.8  | 1428.8 | 5.1  | 55.06                                      | 1.46 | 0.0488      | 0.0015 | 0.0013     | 0.1220 | 0.0040                               | 0.0036 | 0.0182 | 0.0005 | 0.0004 | 0.74     | 0.0061                   | 0.0001   | 139.0       | 59.3  | 116.9    |
| 20102a72      | 118.6                             | Mean | 44                         | 5220.8  | 1040.4 | 5.0  | 54.33                                      | 1.48 | 0.0484      | 0.0015 | 0.0013     | 0.1222 | 0.0039                               | 0.0035 | 0.0184 | 0.0005 | 0.0004 | 0.80     | 0.0060                   | 0.0001   | 116.8       | 67.6  | 117.1    |
| 20102a73      | 118.6                             | Mean | 182                        | 33967.6 | 645.9  | 52.6 | 53.16                                      | 1.35 | 0.0488      | 0.0017 | 0.0015     | 0.1262 | 0.0047                               | 0.0043 | 0.0188 | 0.0005 | 0.0004 | 0.60     | 0.0061                   | 0.0001   | 200.1       | 70.4  | 120.7    |
| 20102a74      | 118.6                             | Mean | 185                        | 34277.2 | 745.2  | 46.0 | 53.12                                      | 1.30 | 0.0490      | 0.0017 | 0.0015     | 0.1269 | 0.0046                               | 0.0041 | 0.0188 | 0.0005 | 0.0004 | 0.59     | 0.0061                   | 0.0001   | 150.1       | 72.2  | 121.3    |
| 24μm3J5Hz3N2  |                                   |      |                            |         |        |      |                                            |      |             |        |            |        |                                      |        |        |        |        |          |                          |          |             |       |          |
| 20111A47      | 119.2                             | T-W  | 35                         | 2248    | 1035.0 | 2.2  | 53.06                                      | 4.05 | 0.0572      | 0.0051 | 0.0050     | 0.1444 | 0.0123                               | 0.0121 | 0.0188 | 0.0014 | 0.0014 | 0.89     | 0.0059                   | 0.0004   | 498.2       | 189.8 | 136.9    |
| 20111A103     | 119.2                             | T-W  | 29                         | 4077    | 456.8  | 8.9  | 52.98                                      | 1.44 | 0.0570      | 0.0028 | 0.0027     | 0.1545 | 0.0071                               | 0.0067 | 0.0189 | 0.0005 | 0.0004 | 0.52     | 0.0059                   | 0.0001   | 494.5       | 103.7 | 145.9    |
| 20111A124     | 119.2                             | T-W  | 41                         | 3435    | 1218.5 | 2.8  | 53.18                                      | 1.74 | 0.0551      | 0.0022 | 0.0021     | 0.1457 | 0.0068                               | 0.0064 | 0.0188 | 0.0006 | 0.0005 | 0.65     | 0.0061                   | 0.0001   | 416.7       | 83.3  | 138.1    |
| 20111A143     | 119.2                             | T-W  | 49                         | 3584    | 1244.2 | 2.9  | 50.31                                      | 1.93 | 0.0909      | 0.0078 | 0.0076     | 0.2590 | 0.0286                               | 0.0283 | 0.0199 | 0.0008 | 0.0007 | 0.32     | 0.0069                   | 0.0003   | 1443.5      | 159.7 | 233.9    |
| 20111A144     | 119.2                             | T-W  | 46                         | 3616    | 1470.9 | 2.5  | 54.04                                      | 1.98 | 0.0523      | 0.0019 | 0.0018     | 0.1333 | 0.0063                               | 0.0060 | 0.0185 | 0.0007 | 0.0006 | 0.74     | 0.0062                   | 0.0001   | 298.2       | 77.8  | 127.1    |
| 20111A164     | 119.2                             | T-W  | 81                         | 13641   | 671.2  | 20.3 | 52.94                                      | 1.93 | 0.0522      | 0.0024 | 0.0023     | 0.1359 | 0.0059                               | 0.0056 | 0.0189 | 0.0007 | 0.0006 | 0.81     | 0.0061                   | 0.0001   | 300.1       | 100.0 | 129.4    |
| 20111A5       | 118.7                             | Mean | 48                         | 5142    | 1187.2 | 4.3  | 54.64                                      | 1.23 | 0.0488      | 0.0019 | 0.0017     | 0.1251 | 0.0039                               | 0.0034 | 0.0183 | 0.0004 | 0.0003 | 0.61     | 0.0063                   | 0.0001   | 200.1       | 85.2  | 119.7    |
| 20111A6       | 118.7                             | Mean | 55                         | 5493    | 1477.2 | 3.7  | 53.37                                      | 1.47 | 0.0492      | 0.0016 | 0.0014     | 0.1301 | 0.0047                               | 0.0043 | 0.0187 | 0.0005 | 0.0004 | 0.70     | 0.0061                   | 0.0001   | 153.8       | 75.0  | 124.2    |
| 20111A7       | 118.7                             | Mean | 56                         | 5761    | 1530.4 | 3.8  | 53.10                                      | 1.14 | 0.0487      | 0.0013 | 0.0011     | 0.1269 | 0.0038                               | 0.0032 | 0.0188 | 0.0004 | 0.0003 | 0.60     | 0.0061                   | 0.0001   | 131.6       | 51.8  | 121.3    |
| 20111A26      | 118.7                             | Mean | 42                         | 4516    | 1051.7 | 4.3  | 54.25                                      | 1.50 | 0.0480      | 0.0018 | 0.0017     | 0.1220 | 0.0047                               | 0.0044 | 0.0184 | 0.0005 | 0.0004 | 0.65     | 0.0060                   | 0.0001   | 98.2        | 81.5  | 116.9    |
| 20111A27      | 118.7                             | Mean | 53                         | 6282    | 1113.4 | 5.6  | 54.49                                      | 1.49 | 0.0478      | 0.0016 | 0.0015     | 0.1237 | 0.0043                               | 0.0038 | 0.0184 | 0.0005 | 0.0004 | 0.74     | 0.0060                   | 0.0001   | 87.1        | 76.8  | 118.4    |
| 20111A46      | 118.7                             | Mean | 49                         | 5835    | 1073.3 | 5.4  | 54.58                                      | 1.57 | 0.0473      | 0.0023 | 0.0022     | 0.1241 | 0.0044                               | 0.0040 | 0.0183 | 0.0005 | 0.0004 | 0.75     | 0.0062                   | 0.0001   | 64.9        | 103.7 | 118.8    |
| 20111A66      | 118.7                             | Mean | 42                         | 3613    | 1256.0 | 2.9  | 52.59                                      | 1.48 | 0.0506      | 0.0018 | 0.0016     | 0.1324 | 0.0045                               | 0.0040 | 0.0190 | 0.0005 | 0.0004 | 0.79     | 0.0059                   | 0.0001   | 233.4       | 74.1  | 126.3    |
| 20111A67      | 118.7                             | Mean | 39                         | 3312    | 1205.3 | 2.7  | 52.86                                      | 1.72 | 0.0480      | 0.0019 | 0.0017     | 0.1283 | 0.0051                               | 0.0047 | 0.0189 | 0.0006 | 0.0005 | 0.79     | 0.0059                   | 0.0001   | 98.2        | 89.8  | 122.6    |
| 20111A83      | 118.7                             | Mean | 52                         | 4509    | 1691.1 | 2.7  | 53.97                                      | 2.67 | 0.0510      | 0.0031 | 0.0030     | 0.1305 | 0.0102                               | 0.0100 | 0.0185 | 0.0009 | 0.0009 | 0.61     | 0.0060                   | 0.0002   | 242.7       | 135.2 | 124.6    |
| 20111A84      | 118.7                             | Mean | 38                         | 3795    | 970.6  | 3.9  | 54.56                                      | 1.49 | 0.0489      | 0.0022 | 0.0020     | 0.1293 | 0.0043                               | 0.0038 | 0.0183 | 0.0005 | 0.0004 | 0.77     | 0.0059                   | 0.0001   | 142.7       | 98.1  | 123.4    |
| 20111A104     | 118.7                             | Mean | 48                         | 3774    | 1567.9 | 2.4  | 53.35                                      | 1.91 | 0.0507      | 0.0016 | 0.0014     | 0.1310 | 0.0054                               | 0.0051 | 0.0187 | 0.0007 | 0.0006 | 0.84     | 0.0058                   | 0.0002   | 233.4       | 63.0  | 125.0    |
| 20111A123     | 118.7                             | Mean | 41                         | 3507    | 1248.8 | 2.8  | 54.61                                      | 1.97 | 0.0480      | 0.0020 | 0.0018     | 0.1231 | 0.0050                               | 0.0046 | 0.0183 | 0.0007 | 0.0006 | 0.87     | 0.0060                   | 0.0001   | 98.2        |       | 117.9    |
| 20111A163     | 118.7                             | Mean | 48                         | 3965    | 1454.4 | 2.7  | 52.75                                      | 1.79 | 0.0482      | 0.0017 | 0.0015     | 0.1257 | 0.0051                               | 0.0047 | 0.0190 | 0.0006 | 0.0006 | 0.80     | 0.0060                   | 0.0001   | 109.4       | 75.9  | 120.2    |
| 20111A183     | 118.7                             | Mean | 84                         | 14433   | 721.6  | 20.0 | 53.29                                      | 1.77 | 0.0501      | 0.0019 | 0.0018     | 0.1305 | 0.0060                               | 0.0056 | 0.0188 | 0.0006 | 0.0006 | 0.69     | 0.0061                   | 0.0001   | 198.2       | 78.7  | 124.5    |



| Analysis date | Final U-Pb ages (Ma) <sup>a</sup> |      | Concentration <sup>b</sup> |       |        | Th/U | Data for Tera-Wasserburg plot <sup>c</sup> |                 |             |                 |            |        | Data for Wetherill plot <sup>c</sup> |        |        |                          | 208Pb/232Th <sup>c</sup> |          | 207Pb/206Pb |          | 207Pb/2 |       |       |
|---------------|-----------------------------------|------|----------------------------|-------|--------|------|--------------------------------------------|-----------------|-------------|-----------------|------------|--------|--------------------------------------|--------|--------|--------------------------|--------------------------|----------|-------------|----------|---------|-------|-------|
|               |                                   |      | Pb                         | Th    | U      |      | 238U/206Pb                                 |                 | 207Pb/206Pb |                 | 207Pb/235U |        | 206Pb/238U                           |        | rho    | 208Pb/232Th <sup>c</sup> |                          | Age (Ma) | 2σ          | Age (Ma) |         |       |       |
|               |                                   |      | ppm                        |       |        |      | Ratio                                      | 2σ <sup>*</sup> | Ratio       | 2σ <sup>*</sup> | 2σ         | Ratio  | 2σ <sup>*</sup>                      | 2σ     |        | Ratio                    | 2σ <sup>*</sup>          |          |             |          | 2σ      | Ratio | 2σ    |
| 20111A184     | 118.7                             | Mean | 77                         | 12756 | 711.9  | 17.9 | 54.00                                      | 1.75            | 0.0484      | 0.0021          | 0.0019     | 0.1260 | 0.0045                               | 0.0041 | 0.0185 | 0.0006                   | 0.0005                   | 0.87     | 0.0061      | 0.0001   | 120.5   | 94.4  | 120.5 |
| 20111A185     | 118.7                             | Mean | 86                         | 15467 | 603.2  | 25.6 | 54.91                                      | 2.36            | 0.0507      | 0.0049          | 0.0049     | 0.1269 | 0.0112                               | 0.0111 | 0.0182 | 0.0008                   | 0.0007                   | 0.46     | 0.0060      | 0.0001   | 233.4   | 198.1 | 121.3 |
| 24μm3J5Hz3N2  |                                   |      |                            |       |        |      |                                            |                 |             |                 |            |        |                                      |        |        |                          |                          |          |             |          |         |       |       |
| 20112C05      | 120.2                             | T-W  | 17                         | 257   | 489.3  | 0.5  | 45.54                                      | 1.53            | 0.1355      | 0.0152          | 0.0151     | 0.4020 | 0.0426                               | 0.0421 | 0.0220 | 0.0007                   | 0.0007                   | 0.29     | 0.02661     | 0.01416  | 2170.1  | 196.1 | 343.1 |
| 20112C08      | 120.2                             | T-W  | 45                         | 4734  | 1040.2 | 4.6  | 52.71                                      | 1.22            | 0.0544      | 0.0033          | 0.0032     | 0.1424 | 0.0084                               | 0.0081 | 0.0190 | 0.0004                   | 0.0003                   | 0.31     | 0.00596     | 0.00012  | 387.1   | 136.1 | 135.2 |
| 20112C11      | 120.2                             | T-W  | 24                         | 561   | 1071.7 | 0.5  | 51.82                                      | 1.29            | 0.0645      | 0.0041          | 0.0040     | 0.1703 | 0.0106                               | 0.0103 | 0.0193 | 0.0005                   | 0.0004                   | 0.32     | 0.00594     | 0.00028  | 761.1   | 125.0 | 159.7 |
| 20112C12      | 120.2                             | T-W  | 110                        | 21938 | 446.4  | 49.1 | 52.94                                      | 1.58            | 0.0553      | 0.0045          | 0.0044     | 0.1420 | 0.0101                               | 0.0098 | 0.0189 | 0.0006                   | 0.0005                   | 0.37     | 0.00550     | 0.00007  | 433.4   | 181.5 | 134.8 |
| 20112C18      | 120.2                             | T-W  | 100                        | 17985 | 840.6  | 21.4 | 53.31                                      | 1.33            | 0.0571      | 0.0037          | 0.0036     | 0.1473 | 0.0093                               | 0.0090 | 0.0188 | 0.0005                   | 0.0004                   | 0.32     | 0.00549     | 0.00008  | 494.5   | 140.7 | 139.6 |
| 20112C19      | 120.2                             | T-W  | 114                        | 20869 | 969.9  | 21.5 | 52.34                                      | 1.24            | 0.0597      | 0.0033          | 0.0032     | 0.1577 | 0.0085                               | 0.0082 | 0.0191 | 0.0005                   | 0.0003                   | 0.35     | 0.00548     | 0.00008  | 590.8   | 113.9 | 148.6 |
| 20112C06      | 119.6                             | Mean | 32                         | 2831  | 932.8  | 3.0  | 52.87                                      | 1.30            | 0.0489      | 0.0031          | 0.0031     | 0.1246 | 0.0075                               | 0.0072 | 0.0189 | 0.0005                   | 0.0004                   | 0.33     | 0.00595     | 0.00015  | 142.7   | 140.7 | 119.3 |
| 20112C07      | 119.6                             | Mean | 46                         | 4241  | 1267.0 | 3.3  | 53.55                                      | 1.24            | 0.0510      | 0.0028          | 0.0027     | 0.1322 | 0.0072                               | 0.0069 | 0.0187 | 0.0004                   | 0.0003                   | 0.33     | 0.00601     | 0.00012  | 242.7   | 119.4 | 126.1 |
| 20112C13      | 119.6                             | Mean | 137                        | 26639 | 514.1  | 51.8 | 52.15                                      | 1.52            | 0.0503      | 0.0041          | 0.0041     | 0.1280 | 0.0096                               | 0.0094 | 0.0192 | 0.0006                   | 0.0005                   | 0.34     | 0.00565     | 0.00008  | 209.3   | 188.9 | 122.3 |
| 20112C20      | 119.6                             | Mean | 113                        | 20197 | 963.4  | 21.0 | 53.67                                      | 1.26            | 0.0493      | 0.0032          | 0.0031     | 0.1249 | 0.0076                               | 0.0074 | 0.0186 | 0.0004                   | 0.0003                   | 0.30     | 0.00552     | 0.00008  | 161.2   | 146.3 | 119.5 |
| 20112C24      | 119.6                             | Mean | 64                         | 7580  | 1469.8 | 5.2  | 53.61                                      | 1.20            | 0.0504      | 0.0026          | 0.0025     | 0.1281 | 0.0068                               | 0.0065 | 0.0187 | 0.0004                   | 0.0003                   | 0.32     | 0.00549     | 0.00009  | 213.0   | 112.0 | 122.4 |
| 20112C25      | 119.6                             | Mean | 65                         | 7928  | 1458.5 | 5.4  | 53.32                                      | 1.15            | 0.0498      | 0.0026          | 0.0025     | 0.1288 | 0.0068                               | 0.0065 | 0.0188 | 0.0004                   | 0.0003                   | 0.30     | 0.00551     | 0.00009  | 187.1   | 116.7 | 123.0 |
| 20112C26      | 119.6                             | Mean | 70                         | 9145  | 1418.3 | 6.4  | 53.72                                      | 1.22            | 0.0509      | 0.0026          | 0.0025     | 0.1300 | 0.0066                               | 0.0063 | 0.0186 | 0.0004                   | 0.0003                   | 0.35     | 0.00543     | 0.00009  | 235.3   | 112.9 | 124.1 |
| 20112C30      | 119.6                             | Mean | 186                        | 35637 | 766.6  | 46.5 | 53.78                                      | 1.38            | 0.0499      | 0.0033          | 0.0032     | 0.1265 | 0.0082                               | 0.0079 | 0.0186 | 0.0005                   | 0.0004                   | 0.33     | 0.00549     | 0.00007  | 190.8   | 154.6 | 121.0 |
| 20112C31      | 119.6                             | Mean | 123                        | 23453 | 458.5  | 51.2 | 53.73                                      | 1.54            | 0.0507      | 0.0041          | 0.0041     | 0.1277 | 0.0093                               | 0.0091 | 0.0186 | 0.0005                   | 0.0005                   | 0.34     | 0.00551     | 0.00007  | 227.8   | 217.6 | 122.1 |
| 20112C32      | 119.6                             | Mean | 192                        | 36506 | 756.3  | 48.3 | 53.25                                      | 1.35            | 0.0488      | 0.0032          | 0.0031     | 0.1257 | 0.0079                               | 0.0077 | 0.0188 | 0.0005                   | 0.0004                   | 0.33     | 0.00541     | 0.00006  | 139.0   | 140.7 | 120.2 |
| 24μm3J10Hz3N2 |                                   |      |                            |       |        |      |                                            |                 |             |                 |            |        |                                      |        |        |                          |                          |          |             |          |         |       |       |
| 20306a8       | 117.3                             | T-W  |                            |       | 1000.0 |      | 49.11                                      | 1.60            | 0.1023      | 0.0078          | 0.0076     | 0.2914 | 0.0204                               | 0.0199 | 0.0204 | 0.0007                   | 0.0006                   | 0.42     |             |          | 1677.8  | 137.2 | 259.7 |
| 20306a27      | 117.3                             | T-W  |                            |       | 1142.0 |      | 51.45                                      | 1.53            | 0.0795      | 0.0030          | 0.0027     | 0.2144 | 0.0106                               | 0.0100 | 0.0194 | 0.0006                   | 0.0005                   | 0.54     |             |          | 1184.3  | 66.7  | 197.3 |
| 20306a10      | 117.3                             | T-W  |                            |       | 1264.6 |      | 52.22                                      | 1.79            | 0.0532      | 0.0019          | 0.0017     | 0.1422 | 0.0057                               | 0.0053 | 0.0191 | 0.0007                   | 0.0006                   | 0.82     |             |          | 338.9   | 74.1  | 135.0 |
| 20306a21      | 117.3                             | T-W  |                            |       | 1798.6 |      | 52.28                                      | 1.34            | 0.1078      | 0.0063          | 0.0061     | 0.3016 | 0.0186                               | 0.0180 | 0.0191 | 0.0005                   | 0.0004                   | 0.35     |             |          | 1762.7  | 102.3 | 267.7 |
| 20306a26      | 117.3                             | T-W  |                            |       | 1442.8 |      | 52.62                                      | 1.42            | 0.0604      | 0.0024          | 0.0022     | 0.1581 | 0.0066                               | 0.0061 | 0.0190 | 0.0005                   | 0.0004                   | 0.58     |             |          | 616.7   | 47.2  | 149.1 |
| 20306a19      | 117.3                             | T-W  |                            |       | 1377.6 |      | 52.67                                      | 1.65            | 0.0525      | 0.0013          | 0.0011     | 0.1370 | 0.0044                               | 0.0039 | 0.0190 | 0.0006                   | 0.0005                   | 0.97     |             |          | 309.3   | 46.3  | 130.4 |
| 20306a29      | 117.3                             | T-W  |                            |       | 1256.0 |      | 52.99                                      | 1.68            | 0.0669      | 0.0023          | 0.0020     | 0.1740 | 0.0074                               | 0.0069 | 0.0189 | 0.0006                   | 0.0005                   | 0.70     |             |          | 835.2   | 63.0  | 162.9 |
| 20306a5       | 117.3                             | T-W  |                            |       | 1309.7 |      | 52.99                                      | 1.82            | 0.0528      | 0.0016          | 0.0014     | 0.1370 | 0.0056                               | 0.0051 | 0.0189 | 0.0006                   | 0.0006                   | 0.82     |             |          | 320.4   | 63.9  | 130.4 |
| 20306a14      | 117.3                             | T-W  |                            |       | 1663.5 |      | 53.26                                      | 1.49            | 0.0671      | 0.0027          | 0.0025     | 0.1739 | 0.0073                               | 0.0068 | 0.0188 | 0.0005                   | 0.0004                   | 0.60     |             |          | 840.4   | 77.8  | 162.8 |

| Analysis date | Final U-Pb ages (Ma) <sup>a</sup> |     | Concentration <sup>b</sup> |         |        | Th/U  | Data for Tera-Wasserburg plot <sup>c</sup> |        |             |        |            |        | Data for Wetherill plot <sup>c</sup> |        |        |        |        |      | 208Pb/232Th <sup>c</sup> |         | 207Pb/206Pb |       | 207Pb/2  |  |
|---------------|-----------------------------------|-----|----------------------------|---------|--------|-------|--------------------------------------------|--------|-------------|--------|------------|--------|--------------------------------------|--------|--------|--------|--------|------|--------------------------|---------|-------------|-------|----------|--|
|               |                                   |     | Pb                         | Th      | U      |       | 238U/206Pb                                 |        | 207Pb/206Pb |        | 207Pb/235U |        | 206Pb/238U                           |        | rho    |        |        |      |                          |         |             |       |          |  |
|               |                                   |     | ppm                        |         |        |       | Ratio                                      | 2σ*    | Ratio       | 2σ*    | 2σ         | Ratio  | 2σ*                                  | 2σ     | Ratio  | 2σ*    | 2σ     | rho  | Ratio                    | 2σ      | Age (Ma)    | 2σ    | Age (Ma) |  |
| 20306a9       | 117.3                             | T-W |                            |         | 1196.7 | 53.56 | 1.80                                       | 0.0850 | 0.0039      | 0.0037 | 0.2207     | 0.0131 | 0.0126                               | 0.0187 | 0.0006 | 0.0006 | 0.52   |      |                          | 1316.7  | 84.4        | 202.5 |          |  |
| 20306a11      | 117.3                             | T-W |                            |         | 1226.4 | 53.68 | 1.63                                       | 0.0556 | 0.0019      | 0.0017 | 0.1425     | 0.0054 | 0.0049                               | 0.0186 | 0.0006 | 0.0005 | 0.76   |      |                          | 435.2   | 68.5        | 135.3 |          |  |
| 20306a13      | 117.3                             | T-W |                            |         | 628.6  | 54.00 | 1.69                                       | 0.0700 | 0.0035      | 0.0033 | 0.1786     | 0.0078 | 0.0073                               | 0.0185 | 0.0006 | 0.0005 | 0.66   |      |                          | 929.3   | 102.0       | 166.8 |          |  |
| 20306a23      | 117.3                             | T-W |                            |         | 1937.1 | 54.07 | 1.33                                       | 0.0490 | 0.0010      | 0.0007 | 0.1248     | 0.0033 | 0.0027                               | 0.0185 | 0.0005 | 0.0004 | 0.89   |      |                          | 146.4   | 33.3        | 119.4 |          |  |
| 20306a20      | 117.3                             | T-W |                            |         | 1782.8 | 54.19 | 1.35                                       | 0.0495 | 0.0010      | 0.0007 | 0.1258     | 0.0034 | 0.0028                               | 0.0185 | 0.0005 | 0.0004 | 0.87   |      |                          | 172.3   | 5.6         | 120.3 |          |  |
| 20306a22      | 117.3                             | T-W |                            |         | 1586.8 | 54.55 | 1.39                                       | 0.0545 | 0.0017      | 0.0014 | 0.1394     | 0.0042 | 0.0037                               | 0.0183 | 0.0005 | 0.0004 | 0.77   |      |                          | 390.8   | 63.9        | 132.6 |          |  |
| 20306a24      | 117.3                             | T-W |                            |         | 1968.1 | 55.04 | 1.22                                       | 0.0564 | 0.0019      | 0.0017 | 0.1412     | 0.0040 | 0.0033                               | 0.0182 | 0.0004 | 0.0003 | 0.68   |      |                          | 477.8   | 32.4        | 134.1 |          |  |
| 20306a7       | 117.3                             | T-W |                            |         | 1559.8 | 55.40 | 1.73                                       | 0.0516 | 0.0012      | 0.0009 | 0.1283     | 0.0044 | 0.0040                               | 0.0180 | 0.0006 | 0.0005 | 0.88   |      |                          | 333.4   | 38.9        | 122.6 |          |  |
| 24μm3J10Hz3N2 |                                   |     |                            |         |        |       |                                            |        |             |        |            |        |                                      |        |        |        |        |      |                          |         |             |       |          |  |
| 20308A11      | 118.0                             | T-W | 898                        |         | 898.5  | 50.85 | 1.75                                       | 0.0741 | 0.0081      | 0.0080 | 0.2004     | 0.0086 | 0.0080                               | 0.0197 | 0.0007 | 0.0006 | 0.78   |      |                          | 1055.6  | 83.3        | 185.4 |          |  |
| 20308A7       | 118.0                             | T-W | 1004                       |         | 1004.2 | 52.19 | 2.02                                       | 0.0776 | 0.0013      | 0.0006 | 0.2168     | 0.0156 | 0.0152                               | 0.0192 | 0.0007 | 0.0007 | 0.51   |      |                          | 1144.5  | 205.6       | 199.2 |          |  |
| 20308A32      | 118.0                             | T-W | 883                        |         | 882.9  | 52.27 | 1.72                                       | 0.0462 | 0.0017      | 0.0016 | 0.1191     | 0.0066 | 0.0064                               | 0.0191 | 0.0006 | 0.0006 | 0.55   |      |                          | 9.4     | 233.3       | 114.2 |          |  |
| 20308A38      | 118.0                             | T-W | 1089                       |         | 1089.4 | 52.36 | 1.81                                       | 0.0720 | 0.0016      | 0.0011 | 0.1899     | 0.0098 | 0.0094                               | 0.0191 | 0.0007 | 0.0006 | 0.63   |      |                          | 987.0   | 116.8       | 176.6 |          |  |
| 20308A19      | 118.0                             | T-W | 867                        |         | 866.6  | 53.25 | 1.88                                       | 0.0661 | 0.0016      | 0.0013 | 0.1720     | 0.0078 | 0.0073                               | 0.0188 | 0.0007 | 0.0006 | 0.75   |      |                          | 810.8   | 86.1        | 161.2 |          |  |
| 20308A18      | 118.0                             | T-W | 985                        |         | 985.1  | 53.34 | 1.88                                       | 0.0526 | 0.0015      | 0.0013 | 0.1362     | 0.0054 | 0.0050                               | 0.0187 | 0.0007 | 0.0006 | 0.86   |      |                          | 322.3   | 74.1        | 129.6 |          |  |
| 20308A25      | 118.0                             | T-W | 860                        |         | 860.2  | 53.41 | 1.87                                       | 0.0511 | 0.0040      | 0.0039 | 0.1326     | 0.0055 | 0.0051                               | 0.0187 | 0.0007 | 0.0006 | 0.82   |      |                          | 255.6   | 60.2        | 126.4 |          |  |
| 20308A26      | 118.0                             | T-W | 1109                       |         | 1108.9 | 53.58 | 1.92                                       | 0.0513 | 0.0019      | 0.0017 | 0.1325     | 0.0057 | 0.0054                               | 0.0187 | 0.0007 | 0.0006 | 0.80   |      |                          | 257.5   | 68.5        | 126.4 |          |  |
| 20308A12      | 118.0                             | T-W | 830                        |         | 830.3  | 53.58 | 1.81                                       | 0.0584 | 0.0014      | 0.0011 | 0.1517     | 0.0061 | 0.0057                               | 0.0187 | 0.0006 | 0.0006 | 0.80   |      |                          | 542.6   | 66.7        | 143.4 |          |  |
| 20308A30      | 118.0                             | T-W | 1126                       |         | 1125.8 | 53.71 | 1.64                                       | 0.0498 | 0.0018      | 0.0016 | 0.1282     | 0.0045 | 0.0040                               | 0.0186 | 0.0006 | 0.0005 | 0.84   |      |                          | 187.1   | 19.4        | 122.5 |          |  |
| 20308A9       | 118.0                             | T-W | 1418                       |         | 1417.8 | 54.30 | 1.74                                       | 0.0597 | 0.0024      | 0.0022 | 0.1513     | 0.0050 | 0.0044                               | 0.0184 | 0.0006 | 0.0005 | 0.96   |      |                          | 590.8   | 37.0        | 143.1 |          |  |
| 20308A33      | 118.0                             | T-W | 1183                       |         | 1182.9 | 54.40 | 1.67                                       | 0.0492 | 0.0016      | 0.0014 | 0.1247     | 0.0043 | 0.0039                               | 0.0184 | 0.0006 | 0.0005 | 0.86   |      |                          | 166.8   | 57.4        | 119.4 |          |  |
| 20308A37      | 118.0                             | T-W | 1793                       |         | 1793.3 | 55.20 | 1.74                                       | 0.0613 | 0.0014      | 0.0010 | 0.1522     | 0.0057 | 0.0052                               | 0.0181 | 0.0006 | 0.0005 | 0.80   |      |                          | 650.0   | 91.7        | 143.9 |          |  |
| 20308A10      | 118.0                             | T-W | 1277                       |         | 1276.5 | 55.49 | 1.99                                       | 0.0489 | 0.0021      | 0.0020 | 0.1214     | 0.0047 | 0.0043                               | 0.0180 | 0.0006 | 0.0006 | 0.92   |      |                          | 142.7   | 42.6        | 116.3 |          |  |
| 24μm5J5Hz3N2  |                                   |     |                            |         |        |       |                                            |        |             |        |            |        |                                      |        |        |        |        |      |                          |         |             |       |          |  |
| 20112D07      | 119.4                             | T-W | 76                         | 4335.0  | 610.7  | 7.1   | 53.44                                      | 1.21   | 0.0466      | 0.0028 | 0.0027     | 0.1181 | 0.0062                               | 0.0060 | 0.0187 | 0.0004 | 0.0003 | 0.33 | 0.00565                  | 0.00010 | 33.4        | 133.3 | 113.4    |  |
| 20112D13      | 119.4                             | T-W | 76                         | 1439.4  | 937.1  | 1.5   | 53.81                                      | 1.15   | 0.0473      | 0.0023 | 0.0022     | 0.1221 | 0.0056                               | 0.0052 | 0.0186 | 0.0004 | 0.0003 | 0.35 | 0.00582                  | 0.00012 | 64.9        | 107.4 | 116.9    |  |
| 20112D17      | 119.4                             | T-W | 2009                       | 25872.1 | 7666.8 | 3.4   | 52.92                                      | 1.26   | 0.0534      | 0.0032 | 0.0031     | 0.1388 | 0.0077                               | 0.0074 | 0.0189 | 0.0005 | 0.0003 | 0.34 | 0.00571                  | 0.00007 | 346.4       | 131.5 | 132.0    |  |
| 20112D18      | 119.4                             | T-W | 1872                       | 19710.5 | 6785.3 | 2.9   | 53.29                                      | 1.33   | 0.0538      | 0.0034 | 0.0033     | 0.1385 | 0.0083                               | 0.0081 | 0.0188 | 0.0005 | 0.0004 | 0.34 | 0.00570                  | 0.00007 | 364.9       | 140.7 | 131.7    |  |
| 20112D05      | 119.4                             | T-W | 76                         | 4729.7  | 674.3  | 7.0   | 51.21                                      | 1.15   | 0.0795      | 0.0049 | 0.0047     | 0.2179 | 0.0137                               | 0.0133 | 0.0195 | 0.0004 | 0.0003 | 0.27 | 0.00588                  | 0.00010 | 1187.0      | 116.7 | 200.2    |  |

| Analysis date       | Final U-Pb ages (Ma) <sup>a</sup> |     | Concentration <sup>b</sup> |        |        | Th/U | Data for Tera-Wasserburg plot <sup>c</sup> |              |             |              |            |            | Data for Wetherill plot <sup>c</sup> |            |            |              |            | 208Pb/232Th <sup>c</sup> |                          | 207Pb/206Pb |             | 207Pb/2    |          |            |
|---------------------|-----------------------------------|-----|----------------------------|--------|--------|------|--------------------------------------------|--------------|-------------|--------------|------------|------------|--------------------------------------|------------|------------|--------------|------------|--------------------------|--------------------------|-------------|-------------|------------|----------|------------|
|                     |                                   |     | Pb                         | Th     | U      |      | 238U/206Pb                                 |              | 207Pb/206Pb |              |            | 207Pb/235U |                                      |            | 206Pb/238U |              |            | rho                      | 208Pb/232Th <sup>c</sup> |             | 207Pb/206Pb |            | 207Pb/2  |            |
|                     |                                   |     | ppm                        |        |        |      | Ratio                                      | 2 $\sigma^*$ | Ratio       | 2 $\sigma^*$ | 2 $\sigma$ | Ratio      | 2 $\sigma^*$                         | 2 $\sigma$ | Ratio      | 2 $\sigma^*$ | 2 $\sigma$ |                          | Ratio                    | 2 $\sigma$  | Age (Ma)    | 2 $\sigma$ | Age (Ma) | 2 $\sigma$ |
| 20112D06            | 119.4                             | T-W | 84                         | 5296.7 | 694.9  | 7.6  | 52.70                                      | 1.16         | 0.0581      | 0.0030       | 0.0029     | 0.1498     | 0.0069                               | 0.0065     | 0.0190     | 0.0004       | 0.0003     | 0.36                     | 0.00561                  | 0.00009     | 600.0       | 109.2      | 141.7    |            |
| 20112D12            | 119.4                             | T-W | 52                         | 2383.6 | 152.2  | 15.7 | 51.62                                      | 1.70         | 0.0821      | 0.0070       | 0.0069     | 0.2064     | 0.0156                               | 0.0153     | 0.0194     | 0.0006       | 0.0006     | 0.39                     | 0.00580                  | 0.00012     | 1247.2      | 166.7      | 190.5    |            |
| 24 $\mu$ m5J5Hz3N2  |                                   |     |                            |        |        |      |                                            |              |             |              |            |            |                                      |            |            |              |            |                          |                          |             |             |            |          |            |
| 20303A26            | 119.0                             | T-W |                            |        | 755.3  |      | 51.70                                      | 1.61         | 0.0521      | 0.0023       | 0.0021     | 0.1379     | 0.0046                               | 0.0040     | 0.0193     | 0.0006       | 0.0005     | 0.93                     |                          |             | 300.1       | 97.2       | 131.2    |            |
| 20303A13            | 119.0                             | T-W |                            |        | 672.1  |      | 51.71                                      | 1.69         | 0.0679      | 0.0044       | 0.0043     | 0.1766     | 0.0081                               | 0.0076     | 0.0193     | 0.0006       | 0.0006     | 0.67                     |                          |             | 877.8       | 130.4      | 165.1    |            |
| 20303A20            | 119.0                             | T-W |                            |        | 634.9  |      | 51.97                                      | 1.46         | 0.0525      | 0.0029       | 0.0028     | 0.1370     | 0.0054                               | 0.0049     | 0.0192     | 0.0005       | 0.0005     | 0.65                     |                          |             | 309.3       | 119.4      | 130.3    |            |
| 20303A28            | 119.0                             | T-W |                            |        | 818.9  |      | 52.01                                      | 1.58         | 0.0569      | 0.0022       | 0.0020     | 0.1499     | 0.0053                               | 0.0048     | 0.0192     | 0.0006       | 0.0005     | 0.83                     |                          |             | 487.1       | 77.8       | 141.8    |            |
| 20303A21            | 119.0                             | T-W |                            |        | 633.9  |      | 52.56                                      | 1.42         | 0.0501      | 0.0021       | 0.0019     | 0.1325     | 0.0041                               | 0.0036     | 0.0190     | 0.0005       | 0.0004     | 0.82                     |                          |             | 211.2       | 88.9       | 126.4    |            |
| 20303A25            | 119.0                             | T-W |                            |        | 824.6  |      | 52.76                                      | 1.63         | 0.0558      | 0.0023       | 0.0022     | 0.1485     | 0.0048                               | 0.0042     | 0.0190     | 0.0006       | 0.0005     | 0.96                     |                          |             | 455.6       | 80.5       | 140.6    |            |
| 20303A22            | 119.0                             | T-W |                            |        | 788.3  |      | 52.91                                      | 1.55         | 0.0521      | 0.0022       | 0.0020     | 0.1363     | 0.0044                               | 0.0039     | 0.0189     | 0.0006       | 0.0005     | 0.88                     |                          |             | 287.1       | 87.0       | 129.8    |            |
| 20303A6             | 119.0                             | T-W |                            |        | 1084.3 |      | 53.34                                      | 2.44         | 0.0548      | 0.0031       | 0.0029     | 0.1374     | 0.0063                               | 0.0059     | 0.0187     | 0.0009       | 0.0008     | 1.00                     |                          |             | 405.6       | 120.4      | 130.7    |            |
| 20303A8             | 119.0                             | T-W |                            |        | 1363.6 |      | 53.49                                      | 2.53         | 0.0563      | 0.0031       | 0.0030     | 0.1423     | 0.0077                               | 0.0074     | 0.0187     | 0.0009       | 0.0008     | 0.86                     |                          |             | 464.9       | 116.7      | 135.1    |            |
| 20303A14            | 119.0                             | T-W |                            |        | 1029.5 |      | 53.83                                      | 2.15         | 0.0496      | 0.0025       | 0.0023     | 0.1310     | 0.0052                               | 0.0048     | 0.0186     | 0.0007       | 0.0007     | 0.99                     |                          |             | 176.0       | 111.1      | 125.0    |            |
| 20303A27            | 119.0                             | T-W |                            |        | 1272.2 |      | 54.44                                      | 1.87         | 0.0510      | 0.0015       | 0.0013     | 0.1265     | 0.0046                               | 0.0041     | 0.0184     | 0.0006       | 0.0006     | 0.94                     |                          |             | 239.0       | 61.1       | 120.9    |            |
| 20303A19            | 119.0                             | T-W |                            |        | 474.2  |      | 54.69                                      | 1.72         | 0.0533      | 0.0025       | 0.0024     | 0.1356     | 0.0058                               | 0.0054     | 0.0183     | 0.0006       | 0.0005     | 0.69                     |                          |             | 342.7       | 101.8      | 129.1    |            |
| 20303A7             | 119.0                             | T-W |                            |        | 1278.6 |      | 54.74                                      | 2.47         | 0.0617      | 0.0031       | 0.0030     | 0.1543     | 0.0085                               | 0.0082     | 0.0183     | 0.0008       | 0.0008     | 0.80                     |                          |             | 664.8       | 99.1       | 145.7    |            |
| 20303A12            | 119.0                             | T-W |                            |        | 1401.6 |      | 54.93                                      | 2.02         | 0.0561      | 0.0022       | 0.0021     | 0.1370     | 0.0059                               | 0.0055     | 0.0182     | 0.0007       | 0.0006     | 0.83                     |                          |             | 457.5       | 113.9      | 130.4    |            |
| 20303A24            | 119.0                             | T-W |                            |        | 1411.7 |      | 55.65                                      | 2.00         | 0.0566      | 0.0021       | 0.0020     | 0.1370     | 0.0053                               | 0.0049     | 0.0180     | 0.0006       | 0.0006     | 0.91                     |                          |             | 476.0       | 77.8       | 130.3    |            |
| 20303A9             | 119.0                             | T-W |                            |        | 1416.5 |      | 56.22                                      | 2.36         | 0.0509      | 0.0020       | 0.0019     | 0.1212     | 0.0053                               | 0.0050     | 0.0178     | 0.0007       | 0.0007     | 0.95                     |                          |             | 235.3       | 87.0       | 116.2    |            |
| 24 $\mu$ m5J10Hz3N2 |                                   |     |                            |        |        |      |                                            |              |             |              |            |            |                                      |            |            |              |            |                          |                          |             |             |            |          |            |
| 20303b30            | 119.5                             | T-W |                            |        | 762.6  |      | 52.10                                      | 1.16         | 0.0516      | 0.0011       | 0.0008     | 0.1364     | 0.0033                               | 0.0026     | 0.0192     | 0.0004       | 0.0003     | 0.86                     |                          |             | 264.9       | 35.2       | 129.8    |            |
| 20303b28            | 119.5                             | T-W |                            |        | 1037.4 |      | 52.25                                      | 1.10         | 0.0591      | 0.0026       | 0.0025     | 0.1569     | 0.0055                               | 0.0049     | 0.0191     | 0.0004       | 0.0003     | 0.46                     |                          |             | 572.3       | 90.7       | 148.0    |            |
| 20303b25            | 119.5                             | T-W |                            |        | 802.3  |      | 52.32                                      | 1.33         | 0.0535      | 0.0017       | 0.0014     | 0.1421     | 0.0044                               | 0.0038     | 0.0191     | 0.0005       | 0.0004     | 0.76                     |                          |             | 350.1       | 54.6       | 134.9    |            |
| 20303b13            | 119.5                             | T-W |                            |        | 903.1  |      | 52.35                                      | 1.34         | 0.0637      | 0.0030       | 0.0028     | 0.1678     | 0.0053                               | 0.0047     | 0.0191     | 0.0005       | 0.0004     | 0.74                     |                          |             | 731.5       | 99.1       | 157.5    |            |
| 20303b14            | 119.5                             | T-W |                            |        | 763.2  |      | 52.55                                      | 1.31         | 0.0658      | 0.0024       | 0.0022     | 0.1732     | 0.0069                               | 0.0064     | 0.0190     | 0.0005       | 0.0004     | 0.53                     |                          |             | 1200.0      | 73.1       | 162.2    |            |
| 20303b23            | 119.5                             | T-W |                            |        | 1053.2 |      | 52.72                                      | 1.32         | 0.0577      | 0.0020       | 0.0018     | 0.1506     | 0.0061                               | 0.0056     | 0.0190     | 0.0005       | 0.0004     | 0.53                     |                          |             | 520.4       | 68.5       | 142.4    |            |
| 20303b27            | 119.5                             | T-W |                            |        | 658.6  |      | 52.72                                      | 1.70         | 0.0576      | 0.0059       | 0.0059     | 0.1633     | 0.0132                               | 0.0129     | 0.0190     | 0.0006       | 0.0005     | 0.36                     |                          |             | 522.3       | 225.9      | 153.5    |            |
| 20303b24            | 119.5                             | T-W |                            |        | 1019.2 |      | 52.82                                      | 1.38         | 0.0524      | 0.0012       | 0.0009     | 0.1367     | 0.0038                               | 0.0032     | 0.0189     | 0.0005       | 0.0004     | 0.91                     |                          |             | 305.6       | 38.9       | 130.1    |            |
| 20303b21            | 119.5                             | T-W |                            |        | 1331.1 |      | 53.25                                      | 1.48         | 0.0505      | 0.0013       | 0.0010     | 0.1297     | 0.0041                               | 0.0036     | 0.0188     | 0.0005       | 0.0004     | 0.83                     |                          |             | 220.4       | 46.3       | 123.8    |            |

| Analysis date  | Final U-Pb ages (Ma) <sup>a</sup> |     | Concentration <sup>b</sup> |    |        | Th/U  | Data for Tera-Wasserburg plot <sup>c</sup> |                 |             |                 |        |            | Data for Wetherill plot <sup>c</sup> |        |            |                 | 208Pb/232Th <sup>c</sup> |     | 207Pb/206Pb |        | 207Pb/2  |       |          |
|----------------|-----------------------------------|-----|----------------------------|----|--------|-------|--------------------------------------------|-----------------|-------------|-----------------|--------|------------|--------------------------------------|--------|------------|-----------------|--------------------------|-----|-------------|--------|----------|-------|----------|
|                |                                   |     | Pb                         | Th | U      |       | 238U/206Pb                                 |                 | 207Pb/206Pb |                 |        | 207Pb/235U |                                      |        | 206Pb/238U |                 |                          |     | Ratio       | 2σ     | Age (Ma) | 2σ    | Age (Ma) |
|                |                                   |     | ppm                        |    |        |       | Ratio                                      | 2σ <sup>*</sup> | Ratio       | 2σ <sup>*</sup> | 2σ     | Ratio      | 2σ <sup>*</sup>                      | 2σ     | Ratio      | 2σ <sup>*</sup> | 2σ                       | rho |             |        |          |       |          |
| 20303b8        | 119.5                             | T-W |                            |    | 1444.9 | 53.62 | 1.23                                       | 0.0490          | 0.0009      | 0.0005          | 0.1260 | 0.0029     | 0.0022                               | 0.0186 | 0.0004     | 0.0003          | 0.99                     |     |             | 150.1  | 24.1     | 120.5 |          |
| 20303b6        | 119.5                             | T-W |                            |    | 1154.1 | 53.92 | 1.34                                       | 0.0503          | 0.0018      | 0.0016          | 0.1303 | 0.0035     | 0.0029                               | 0.0185 | 0.0005     | 0.0004          | 0.88                     |     |             | 209.3  | 75.9     | 124.4 |          |
| 20303b9        | 119.5                             | T-W |                            |    | 1425.7 | 53.94 | 1.34                                       | 0.0525          | 0.0018      | 0.0016          | 0.1364 | 0.0040     | 0.0034                               | 0.0185 | 0.0005     | 0.0004          | 0.79                     |     |             | 305.6  | 68.5     | 129.8 |          |
| 20303b11       | 119.5                             | T-W |                            |    | 1633.3 | 54.41 | 1.25                                       | 0.0524          | 0.0010      | 0.0006          | 0.1325 | 0.0031     | 0.0024                               | 0.0184 | 0.0004     | 0.0003          | 0.95                     |     |             | 301.9  | 27.8     | 126.4 |          |
| 24μm10J5Hz3N2  |                                   |     |                            |    |        |       |                                            |                 |             |                 |        |            |                                      |        |            |                 |                          |     |             |        |          |       |          |
| 20304B29       | 119.4                             | T-W |                            |    | 771.0  | 41.16 | 1.22                                       | 0.2548          | 0.0125      | 0.0119          | 0.8955 | 0.0432     | 0.0410                               | 0.0243 | 0.0007     | 0.0006          | 0.56                     |     |             | 3216.7 | 73.5     | 649.3 |          |
| 20304B22       | 119.4                             | T-W |                            |    | 364.2  | 44.31 | 1.03                                       | 0.1975          | 0.0078      | 0.0072          | 0.6355 | 0.0189     | 0.0162                               | 0.0226 | 0.0005     | 0.0004          | 0.69                     |     |             | 2805.3 | 60.3     | 499.5 |          |
| 20304B19       | 119.4                             | T-W |                            |    | 437.8  | 44.59 | 1.53                                       | 0.1446          | 0.0143      | 0.0141          | 0.4871 | 0.0565     | 0.0560                               | 0.0224 | 0.0008     | 0.0007          | 0.27                     |     |             | 2283.6 | 168.4    | 402.9 |          |
| 20304B21       | 119.4                             | T-W |                            |    | 513.1  | 47.75 | 1.20                                       | 0.1285          | 0.0058      | 0.0054          | 0.3795 | 0.0136     | 0.0123                               | 0.0209 | 0.0005     | 0.0004          | 0.62                     |     |             | 2077.5 | 41.5     | 326.6 |          |
| 20304B20       | 119.4                             | T-W |                            |    | 413.9  | 48.32 | 1.24                                       | 0.1146          | 0.0073      | 0.0071          | 0.3452 | 0.0194     | 0.0187                               | 0.0207 | 0.0005     | 0.0004          | 0.38                     |     |             | 1873.8 | 111.4    | 301.1 |          |
| 20304B24       | 119.4                             | T-W |                            |    | 1252.4 | 48.56 | 1.40                                       | 0.1397          | 0.0115      | 0.0113          | 0.4184 | 0.0401     | 0.0396                               | 0.0206 | 0.0006     | 0.0005          | 0.26                     |     |             | 2233.3 | 145.2    | 354.9 |          |
| 20304B23       | 119.4                             | T-W |                            |    | 1319.0 | 49.55 | 1.56                                       | 0.1019          | 0.0083      | 0.0081          | 0.2903 | 0.0264     | 0.0260                               | 0.0202 | 0.0006     | 0.0006          | 0.31                     |     |             | 1658.9 | 148.2    | 258.8 |          |
| 20304B26       | 119.4                             | T-W |                            |    | 1129.1 | 49.89 | 1.13                                       | 0.1111          | 0.0089      | 0.0087          | 0.3185 | 0.0203     | 0.0197                               | 0.0200 | 0.0005     | 0.0003          | 0.27                     |     |             | 1818.2 | 142.3    | 280.8 |          |
| 20304B7        | 119.4                             | T-W |                            |    | 819.5  | 50.32 | 1.65                                       | 0.0758          | 0.0044      | 0.0042          | 0.2075 | 0.0089     | 0.0083                               | 0.0199 | 0.0007     | 0.0006          | 0.73                     |     |             | 1100.0 | 111.1    | 191.5 |          |
| 20304B12       | 119.4                             | T-W |                            |    | 1327.4 | 52.19 | 1.10                                       | 0.0648          | 0.0031      | 0.0029          | 0.1775 | 0.0053     | 0.0046                               | 0.0192 | 0.0004     | 0.0003          | 0.56                     |     |             | 768.5  | 94.4     | 165.9 |          |
| 20304B8        | 119.4                             | T-W |                            |    | 1198.0 | 52.72 | 1.35                                       | 0.0555          | 0.0037      | 0.0036          | 0.1428 | 0.0048     | 0.0043                               | 0.0190 | 0.0005     | 0.0004          | 0.68                     |     |             | 431.5  | 144.4    | 135.6 |          |
| 20304B11       | 119.4                             | T-W |                            |    | 1202.7 | 52.77 | 1.37                                       | 0.0505          | 0.0020      | 0.0019          | 0.1308 | 0.0034     | 0.0028                               | 0.0190 | 0.0005     | 0.0004          | 0.99                     |     |             | 220.4  | 87.0     | 124.8 |          |
| 20304B9        | 119.4                             | T-W |                            |    | 802.8  | 52.89 | 1.21                                       | 0.0526          | 0.0029      | 0.0028          | 0.1391 | 0.0047     | 0.0042                               | 0.0189 | 0.0004     | 0.0003          | 0.56                     |     |             | 309.3  | 122.2    | 132.3 |          |
| 20304B6        | 119.4                             | T-W |                            |    | 1314.1 | 53.00 | 1.28                                       | 0.0475          | 0.0029      | 0.0028          | 0.1253 | 0.0037     | 0.0032                               | 0.0189 | 0.0005     | 0.0004          | 0.74                     |     |             | 72.3   | 133.3    | 119.8 |          |
| 20304B13       | 119.4                             | T-W |                            |    | 1152.0 | 53.27 | 1.14                                       | 0.0594          | 0.0023      | 0.0021          | 0.1565 | 0.0038     | 0.0030                               | 0.0188 | 0.0004     | 0.0003          | 0.78                     |     |             | 583.4  | 75.9     | 147.6 |          |
| 20304B27       | 119.4                             | T-W |                            |    | 1067.0 | 53.34 | 1.39                                       | 0.0593          | 0.0038      | 0.0036          | 0.1516 | 0.0040     | 0.0033                               | 0.0187 | 0.0005     | 0.0004          | 0.96                     |     |             | 588.9  | 133.3    | 143.3 |          |
| 20304B5        | 119.4                             | T-W |                            |    | 1267.5 | 53.45 | 1.09                                       | 0.0527          | 0.0016      | 0.0014          | 0.1373 | 0.0032     | 0.0025                               | 0.0187 | 0.0004     | 0.0003          | 0.75                     |     |             | 322.3  | 59.3     | 130.7 |          |
| 24μm10J10Hz3N2 |                                   |     |                            |    |        |       |                                            |                 |             |                 |        |            |                                      |        |            |                 |                          |     |             |        |          |       |          |
| 20304C20       | 116.4                             | T-W |                            |    | 653.7  | 36.54 | 1.25                                       | 0.3141          | 0.0156      | 0.0149          | 1.2298 | 0.0876     | 0.0856                               | 0.0274 | 0.0009     | 0.0008          | 0.44                     |     |             | 3542.6 | 73.1     | 814.2 |          |
| 20304C14       | 116.4                             | T-W |                            |    | 676.6  | 46.51 | 1.23                                       | 0.1621          | 0.0094      | 0.0091          | 0.4856 | 0.0327     | 0.0318                               | 0.0215 | 0.0006     | 0.0005          | 0.33                     |     |             | 2479.6 | 94.1     | 401.9 |          |
| 20304C19       | 116.4                             | T-W |                            |    | 1350.5 | 47.05 | 1.11                                       | 0.1520          | 0.0119      | 0.0117          | 0.4728 | 0.0393     | 0.0387                               | 0.0213 | 0.0005     | 0.0004          | 0.22                     |     |             | 2368.8 | 131.2    | 393.1 |          |
| 20304C6        | 116.4                             | T-W |                            |    | 1517.8 | 49.56 | 1.32                                       | 0.1124          | 0.0110      | 0.0109          | 0.3347 | 0.0324     | 0.0320                               | 0.0202 | 0.0005     | 0.0004          | 0.23                     |     |             | 1838.6 | 175.9    | 293.2 |          |
| 20304C13       | 116.4                             | T-W |                            |    | 961.7  | 50.41 | 1.19                                       | 0.1093          | 0.0099      | 0.0098          | 0.3157 | 0.0294     | 0.0290                               | 0.0198 | 0.0005     | 0.0004          | 0.20                     |     |             | 1787.4 | 164.2    | 278.6 |          |
| 20304C7        | 116.4                             | T-W |                            |    | 1481.8 | 50.65 | 1.05                                       | 0.0954          | 0.0062      | 0.0060          | 0.2612 | 0.0172     | 0.0168                               | 0.0197 | 0.0004     | 0.0003          | 0.22                     |     |             | 1535.5 | 118.5    | 235.6 |          |

| Analysis date | Final U-Pb ages (Ma) <sup>a</sup> |      | Concentration <sup>b</sup> |        |        | Th/U  | Data for Tera-Wasserburg plot <sup>c</sup> |        |             |        |            |        | Data for Wetherill plot <sup>c</sup> |        |        |        |        | 208Pb/232Th <sup>c</sup> |        | 207Pb/206Pb |          | 207Pb/2 |          |
|---------------|-----------------------------------|------|----------------------------|--------|--------|-------|--------------------------------------------|--------|-------------|--------|------------|--------|--------------------------------------|--------|--------|--------|--------|--------------------------|--------|-------------|----------|---------|----------|
|               |                                   |      | Pb                         | Th     | U      |       | 238U/206Pb                                 |        | 207Pb/206Pb |        | 207Pb/235U |        | 206Pb/238U                           |        |        | Ratio  | 2σ     | Age (Ma)                 | 2σ     | Age (Ma)    |          |         |          |
|               |                                   |      | ppm                        |        |        |       | Ratio                                      | 2σ*    | Ratio       | 2σ*    | 2σ         | Ratio  | 2σ*                                  | 2σ     | Ratio  | 2σ*    | 2σ     | rho                      | Ratio  | 2σ          | Age (Ma) | 2σ      | Age (Ma) |
| 20304C23      | 116.4                             | T-W  |                            |        | 1443.9 | 51.54 | 1.11                                       | 0.0920 | 0.0057      | 0.0055 | 0.2526     | 0.0158 | 0.0153                               | 0.0194 | 0.0004 | 0.0003 | 0.25   |                          |        | 1533.3      | 114.5    | 228.7   |          |
| 20304C24      | 116.4                             | T-W  |                            |        | 932.0  | 51.90 | 1.06                                       | 0.0882 | 0.0031      | 0.0028 | 0.2345     | 0.0082 | 0.0073                               | 0.0193 | 0.0004 | 0.0003 | 0.43   |                          |        | 1387.0      | 65.7     | 213.9   |          |
| 20304C11      | 116.4                             | T-W  |                            |        | 558.0  | 52.17 | 1.08                                       | 0.1040 | 0.0048      | 0.0045 | 0.2728     | 0.0112 | 0.0104                               | 0.0192 | 0.0004 | 0.0003 | 0.36   |                          |        | 1696.0      | 81.0     | 244.9   |          |
| 20304C10      | 116.4                             | T-W  |                            |        | 1240.0 | 52.30 | 1.10                                       | 0.0998 | 0.0045      | 0.0043 | 0.2626     | 0.0129 | 0.0122                               | 0.0191 | 0.0004 | 0.0003 | 0.31   |                          |        | 1620.7      | 79.3     | 236.7   |          |
| 20304C9       | 116.4                             | T-W  |                            |        | 1215.0 | 52.32 | 1.00                                       | 0.0916 | 0.0046      | 0.0044 | 0.2411     | 0.0124 | 0.0118                               | 0.0191 | 0.0004 | 0.0002 | 0.23   |                          |        | 1459.0      | 90.4     | 219.3   |          |
| 20304C22      | 116.4                             | T-W  |                            |        | 1301.6 | 52.51 | 1.03                                       | 0.0843 | 0.0057      | 0.0056 | 0.2250     | 0.0174 | 0.0171                               | 0.0190 | 0.0004 | 0.0002 | 0.16   |                          |        | 1299.7      | 133.8    | 206.1   |          |
| 20304C26      | 116.4                             | T-W  |                            |        | 849.8  | 53.27 | 1.15                                       | 0.0772 | 0.0049      | 0.0047 | 0.2013     | 0.0110 | 0.0106                               | 0.0188 | 0.0004 | 0.0003 | 0.29   |                          |        | 1127.8      | 116.2    | 186.2   |          |
| 20304C12      | 116.4                             | T-W  |                            |        | 1284.6 | 53.58 | 1.08                                       | 0.0580 | 0.0017      | 0.0014 | 0.1476     | 0.0037 | 0.0029                               | 0.0187 | 0.0004 | 0.0002 | 0.66   |                          |        | 531.5       | 53.7     | 139.8   |          |
| 20304C28      | 116.4                             | T-W  |                            |        | 853.1  | 53.77 | 1.07                                       | 0.0733 | 0.0030      | 0.0028 | 0.1883     | 0.0070 | 0.0064                               | 0.0186 | 0.0004 | 0.0002 | 0.37   |                          |        | 1033.3      | 77.8     | 175.2   |          |
| 20304C21      | 116.4                             | T-W  |                            |        | 1646.8 | 54.13 | 1.04                                       | 0.0539 | 0.0016      | 0.0014 | 0.1370     | 0.0038 | 0.0032                               | 0.0185 | 0.0004 | 0.0002 | 0.51   |                          |        | 364.9       | 55.6     | 130.4   |          |
| 20304C8       | 116.4                             | T-W  |                            |        | 1519.1 | 54.22 | 1.04                                       | 0.0583 | 0.0021      | 0.0019 | 0.1474     | 0.0035 | 0.0027                               | 0.0184 | 0.0004 | 0.0002 | 0.62   |                          |        | 538.9       | 63.9     | 139.6   |          |
| 20304C29      | 116.4                             | T-W  |                            |        | 864.3  | 54.23 | 1.08                                       | 0.0529 | 0.0014      | 0.0012 | 0.1342     | 0.0034 | 0.0027                               | 0.0184 | 0.0004 | 0.0002 | 0.62   |                          |        | 324.1       | 51.8     | 127.9   |          |
| 24μm3J5Hz     |                                   |      |                            |        |        |       |                                            |        |             |        |            |        |                                      |        |        |        |        |                          |        |             |          |         |          |
| 20107A12      | 120.1                             | T-W  | 49                         | 5416.2 | 1116.1 | 4.9   | 53.01                                      | 1.98   | 0.0569      | 0.0071 | 0.0070     | 0.1465 | 0.0167                               | 0.0166 | 0.0189 | 0.0007 | 0.0006 | 0.30                     | 0.0059 | 0.0004      | 487.1    | 274.0   | 138.8    |
| 20107A19      | 120.1                             | T-W  | 49                         | 5259.0 | 1143.6 | 4.6   | 52.91                                      | 2.10   | 0.0590      | 0.0074 | 0.0073     | 0.1551 | 0.0181                               | 0.0180 | 0.0189 | 0.0008 | 0.0007 | 0.32                     | 0.0057 | 0.0004      | 568.6    | 272.2   | 146.4    |
| 20107A20      | 120.1                             | T-W  | 25                         | 1262.7 | 970.8  | 1.3   | 52.95                                      | 2.29   | 0.0569      | 0.0085 | 0.0085     | 0.1385 | 0.0179                               | 0.0177 | 0.0189 | 0.0008 | 0.0008 | 0.32                     | 0.0058 | 0.0007      | 487.1    | 334.1   | 131.7    |
| 20107A25      | 120.1                             | T-W  | 28                         | 1455.2 | 1121.3 | 1.3   | 52.08                                      | 1.98   | 0.0557      | 0.0066 | 0.0065     | 0.1469 | 0.0164                               | 0.0162 | 0.0192 | 0.0007 | 0.0007 | 0.32                     | 0.0058 | 0.0008      | 442.6    | 258.3   | 139.2    |
| 20107A26      | 120.1                             | T-W  | 46                         | 4936.9 | 995.5  | 5.0   | 52.79                                      | 2.27   | 0.0622      | 0.0070 | 0.0070     | 0.1604 | 0.0178                               | 0.0176 | 0.0189 | 0.0008 | 0.0008 | 0.37                     | 0.0059 | 0.0004      | 683.3    | 236.1   | 151.1    |
| 20107A30      | 120.1                             | T-W  | 32                         | 1542.5 | 1326.5 | 1.2   | 52.18                                      | 2.06   | 0.0611      | 0.0070 | 0.0070     | 0.1581 | 0.0176                               | 0.0175 | 0.0192 | 0.0008 | 0.0007 | 0.33                     | 0.0061 | 0.0007      | 642.6    | 247.0   | 149.1    |
| 20107A32      | 120.1                             | T-W  | 43                         | 974.6  | 2102.0 | 0.5   | 52.18                                      | 1.81   | 0.0532      | 0.0051 | 0.0050     | 0.1415 | 0.0121                               | 0.0119 | 0.0192 | 0.0007 | 0.0006 | 0.37                     | 0.0067 | 0.0008      | 338.9    | 214.8   | 134.4    |
| 20107A5       | 121.1                             | Mean | 47                         | 3360.3 | 1436.8 | 2.3   | 53.35                                      | 1.97   | 0.0490      | 0.0051 | 0.0050     | 0.1257 | 0.0124                               | 0.0123 | 0.0187 | 0.0007 | 0.0006 | 0.34                     | 0.0060 | 0.0005      | 150.1    | 222.2   | 120.3    |
| 20107A6       | 121.1                             | Mean | 47                         | 3352.0 | 1420.9 | 2.4   | 52.78                                      | 1.89   | 0.0471      | 0.0053 | 0.0052     | 0.1229 | 0.0130                               | 0.0129 | 0.0189 | 0.0007 | 0.0006 | 0.31                     | 0.0060 | 0.0004      | 53.8     | 244.4   | 117.7    |
| 20107A7       | 121.1                             | Mean | 34                         | 2100.2 | 1142.1 | 1.8   | 52.93                                      | 1.97   | 0.0500      | 0.0055 | 0.0054     | 0.1313 | 0.0144                               | 0.0143 | 0.0189 | 0.0007 | 0.0006 | 0.31                     | 0.0060 | 0.0006      | 194.5    | 233.3   | 125.3    |
| 20107A11      | 121.1                             | Mean | 54                         | 5514.4 | 1147.3 | 4.8   | 54.11                                      | 2.31   | 0.0486      | 0.0058 | 0.0057     | 0.1311 | 0.0123                               | 0.0121 | 0.0185 | 0.0008 | 0.0007 | 0.43                     | 0.0061 | 0.0004      | 127.9    | 255.5   | 125.1    |
| 20107A13      | 121.1                             | Mean | 46                         | 3348.9 | 1532.7 | 2.2   | 51.75                                      | 1.64   | 0.0510      | 0.0058 | 0.0057     | 0.1350 | 0.0142                               | 0.0140 | 0.0193 | 0.0006 | 0.0005 | 0.27                     | 0.0060 | 0.0005      | 242.7    | 240.7   | 128.5    |
| 20107A18      | 121.1                             | Mean | 62                         | 6460.7 | 1461.4 | 4.4   | 53.07                                      | 1.75   | 0.0524      | 0.0061 | 0.0061     | 0.1351 | 0.0153                               | 0.0151 | 0.0188 | 0.0006 | 0.0005 | 0.26                     | 0.0057 | 0.0004      | 301.9    | 264.8   | 128.7    |
| 20107A24      | 121.1                             | Mean | 32                         | 1579.1 | 1269.3 | 1.2   | 52.00                                      | 2.41   | 0.0520      | 0.0072 | 0.0072     | 0.1327 | 0.0156                               | 0.0155 | 0.0192 | 0.0009 | 0.0008 | 0.38                     | 0.0061 | 0.0007      | 283.4    | 288.9   | 126.5    |
| 20107A31      | 121.1                             | Mean | 64                         | 6282.7 | 1531.1 | 4.1   | 52.17                                      | 1.82   | 0.0502      | 0.0056 | 0.0056     | 0.1353 | 0.0142                               | 0.0141 | 0.0192 | 0.0007 | 0.0006 | 0.30                     | 0.0063 | 0.0004      | 211.2    | 231.5   | 128.8    |
| 24μm3J10Hz    |                                   |      |                            |        |        |       |                                            |        |             |        |            |        |                                      |        |        |        |        |                          |        |             |          |         |          |

| Analysis date | Final U-Pb ages (Ma) <sup>a</sup> |      | Concentration <sup>b</sup> |         |        | Th/U | Data for Tera-Wasserburg plot <sup>c</sup> |                 |             |                 |            |        | Data for Wetherill plot <sup>c</sup> |        |        |                 |        | 208Pb/232Th <sup>c</sup> |        | 207Pb/206Pb |          | 207Pb/2 |       |
|---------------|-----------------------------------|------|----------------------------|---------|--------|------|--------------------------------------------|-----------------|-------------|-----------------|------------|--------|--------------------------------------|--------|--------|-----------------|--------|--------------------------|--------|-------------|----------|---------|-------|
|               |                                   |      | Pb                         | Th      | U      |      | 238U/206Pb                                 |                 | 207Pb/206Pb |                 | 207Pb/235U |        | 206Pb/238U                           |        |        | Ratio           | 2σ     | Age (Ma)                 | 2σ     |             |          |         |       |
|               |                                   |      | ppm                        |         |        |      | Ratio                                      | 2σ <sup>*</sup> | Ratio       | 2σ <sup>*</sup> | 2σ         | Ratio  | 2σ <sup>*</sup>                      | 2σ     | Ratio  | 2σ <sup>*</sup> | 2σ     | rho                      | Ratio  | 2σ          | Age (Ma) |         | 2σ    |
| 20106c12      | 120.5                             | T-W  | 53                         | 3774.9  | 1601.5 | 2.4  | 51.88                                      | 1.80            | 0.0517      | 0.0047          | 0.0047     | 0.1412 | 0.0126                               | 0.0125 | 0.0193 | 0.0007          | 0.0006 | 0.35                     | 0.0065 | 0.0004      | 272.3    | 212.0   | 134.1 |
| 20106c19      | 120.5                             | T-W  | 68                         | 5050.1  | 2018.4 | 2.5  | 51.79                                      | 1.64            | 0.0578      | 0.0048          | 0.0047     | 0.1526 | 0.0127                               | 0.0124 | 0.0193 | 0.0006          | 0.0005 | 0.34                     | 0.0059 | 0.0003      | 520.4    | 184.2   | 144.2 |
| 20106c26      | 120.5                             | T-W  | 134                        | 19252.4 | 1108.3 | 17.4 | 51.43                                      | 1.74            | 0.0588      | 0.0063          | 0.0062     | 0.1536 | 0.0143                               | 0.0141 | 0.0194 | 0.0007          | 0.0006 | 0.33                     | 0.0061 | 0.0002      | 561.1    | 226.8   | 145.1 |
| 20106c36      | 120.5                             | T-W  | 51                         | 4274.7  | 1257.7 | 3.4  | 54.29                                      | 1.93            | 0.0677      | 0.0068          | 0.0067     | 0.1702 | 0.0161                               | 0.0158 | 0.0184 | 0.0007          | 0.0006 | 0.35                     | 0.0058 | 0.0003      | 858.9    | 207.4   | 159.6 |
| 20106c37      | 120.5                             | T-W  | 49                         | 4665.4  | 1226.4 | 3.8  | 52.83                                      | 1.89            | 0.0546      | 0.0063          | 0.0062     | 0.1397 | 0.0146                               | 0.0145 | 0.0189 | 0.0007          | 0.0006 | 0.31                     | 0.0058 | 0.0003      | 394.5    | 257.4   | 132.8 |
| 20106c5       | 121.7                             | Mean | 60                         | 6539.4  | 1360.8 | 4.8  | 54.57                                      | 1.80            | 0.0527      | 0.0052          | 0.0052     | 0.1321 | 0.0125                               | 0.0123 | 0.0183 | 0.0006          | 0.0005 | 0.31                     | 0.0058 | 0.0003      | 316.7    | 224.0   | 126.0 |
| 20106c6       | 121.7                             | Mean | 43                         | 2911.6  | 1433.7 | 2.0  | 52.22                                      | 1.72            | 0.0519      | 0.0049          | 0.0048     | 0.1349 | 0.0112                               | 0.0110 | 0.0192 | 0.0006          | 0.0006 | 0.36                     | 0.0060 | 0.0004      | 279.7    | 212.9   | 128.5 |
| 20106c7       | 121.7                             | Mean | 53                         | 5543.8  | 1142.5 | 4.9  | 52.48                                      | 1.67            | 0.0522      | 0.0055          | 0.0054     | 0.1380 | 0.0130                               | 0.0129 | 0.0191 | 0.0006          | 0.0005 | 0.30                     | 0.0057 | 0.0004      | 294.5    | 241.6   | 131.2 |
| 20106c13      | 121.7                             | Mean | 58                         | 6813.8  | 1001.3 | 6.8  | 52.11                                      | 1.89            | 0.0479      | 0.0045          | 0.0044     | 0.1254 | 0.0116                               | 0.0114 | 0.0192 | 0.0007          | 0.0006 | 0.36                     | 0.0059 | 0.0003      | 100.1    | 198.1   | 120.0 |
| 20106c14      | 121.7                             | Mean | 63                         | 4048.8  | 2095.0 | 1.9  | 51.93                                      | 1.53            | 0.0526      | 0.0045          | 0.0044     | 0.1394 | 0.0114                               | 0.0112 | 0.0193 | 0.0006          | 0.0005 | 0.31                     | 0.0059 | 0.0004      | 322.3    | 192.6   | 132.5 |
| 20106c18      | 121.7                             | Mean | 68                         | 5065.6  | 2086.1 | 2.4  | 53.64                                      | 1.50            | 0.0490      | 0.0041          | 0.0040     | 0.1281 | 0.0097                               | 0.0095 | 0.0186 | 0.0005          | 0.0004 | 0.32                     | 0.0063 | 0.0003      | 146.4    | 181.5   | 122.4 |
| 20106c20      | 121.7                             | Mean | 47                         | 3152.3  | 1530.0 | 2.1  | 52.25                                      | 1.74            | 0.0495      | 0.0045          | 0.0045     | 0.1324 | 0.0117                               | 0.0115 | 0.0191 | 0.0006          | 0.0006 | 0.34                     | 0.0061 | 0.0004      | 172.3    | 200.0   | 126.2 |
| 20106c24      | 121.7                             | Mean | 54                         | 4940.5  | 1403.0 | 3.5  | 51.73                                      | 1.63            | 0.0486      | 0.0048          | 0.0047     | 0.1313 | 0.0119                               | 0.0117 | 0.0193 | 0.0006          | 0.0005 | 0.31                     | 0.0060 | 0.0003      | 127.9    | 214.8   | 125.3 |
| 20106c25      | 121.7                             | Mean | 56                         | 5046.5  | 1576.0 | 3.2  | 51.86                                      | 1.65            | 0.0467      | 0.0041          | 0.0041     | 0.1228 | 0.0097                               | 0.0095 | 0.0193 | 0.0006          | 0.0005 | 0.36                     | 0.0058 | 0.0003      | 35.3     | 196.3   | 117.6 |
| 20106c31      | 121.7                             | Mean | 55                         | 6548.3  | 1040.7 | 6.3  | 51.35                                      | 1.69            | 0.0521      | 0.0063          | 0.0062     | 0.1379 | 0.0149                               | 0.0147 | 0.0195 | 0.0006          | 0.0006 | 0.27                     | 0.0059 | 0.0003      | 300.1    | 238.9   | 131.2 |
| 20106c32      | 121.7                             | Mean | 78                         | 6918.1  | 2099.9 | 3.3  | 52.57                                      | 1.57            | 0.0497      | 0.0044          | 0.0043     | 0.1303 | 0.0111                               | 0.0109 | 0.0190 | 0.0006          | 0.0005 | 0.31                     | 0.0058 | 0.0003      | 189.0    | 183.3   | 124.4 |
| 20106c33      | 121.7                             | Mean | 62                         | 5324.1  | 1707.6 | 3.1  | 52.88                                      | 1.78            | 0.0501      | 0.0045          | 0.0044     | 0.1340 | 0.0107                               | 0.0105 | 0.0189 | 0.0006          | 0.0006 | 0.38                     | 0.0060 | 0.0003      | 198.2    | 196.3   | 127.7 |
| 20106c38      | 121.7                             | Mean | 54                         | 4501.4  | 1537.0 | 2.9  | 52.05                                      | 1.67            | 0.0473      | 0.0049          | 0.0049     | 0.1246 | 0.0116                               | 0.0114 | 0.0192 | 0.0006          | 0.0005 | 0.31                     | 0.0062 | 0.0003      | 64.9     | 229.6   | 119.3 |
| 24μm5J5Hz     |                                   |      |                            |         |        |      |                                            |                 |             |                 |            |        |                                      |        |        |                 |        |                          |        |             |          |         |       |
| 20107A42      | 118.9                             | T-W  | 41                         | 4666.0  | 932.1  | 5.0  | 53.51                                      | 1.81            | 0.0490      | 0.0064          | 0.0064     | 0.1376 | 0.0154                               | 0.0153 | 0.0187 | 0.0006          | 0.0006 | 0.27                     | 0.0058 | 0.0003      | 150.1    | 277.7   | 130.9 |
| 20107A48      | 118.9                             | T-W  | 158                        | 28246.0 | 652.6  | 43.3 | 53.80                                      | 2.34            | 0.0534      | 0.0074          | 0.0073     | 0.1382 | 0.0165                               | 0.0164 | 0.0186 | 0.0008          | 0.0008 | 0.34                     | 0.0058 | 0.0002      | 342.7    | 285.1   | 131.5 |
| 20107A57      | 118.9                             | T-W  | 104                        | 17385.7 | 424.8  | 40.9 | 50.37                                      | 2.56            | 0.0947      | 0.0123          | 0.0122     | 0.2937 | 0.0283                               | 0.0280 | 0.0199 | 0.0010          | 0.0010 | 0.51                     | 0.0060 | 0.0002      | 1524.1   | 246.3   | 261.4 |
| 20107A41      | 120.8                             | Mean | 27                         | 1294.4  | 1104.9 | 1.2  | 52.42                                      | 1.78            | 0.0487      | 0.0054          | 0.0053     | 0.1310 | 0.0134                               | 0.0133 | 0.0191 | 0.0006          | 0.0006 | 0.30                     | 0.0061 | 0.0007      | 200.1    | 172.2   | 125.0 |
| 20107A43      | 120.8                             | Mean | 38                         | 4244.0  | 823.6  | 5.2  | 53.73                                      | 1.92            | 0.0483      | 0.0067          | 0.0066     | 0.1291 | 0.0133                               | 0.0132 | 0.0186 | 0.0007          | 0.0006 | 0.32                     | 0.0058 | 0.0004      | 122.3    | 290.7   | 123.3 |
| 20107A47      | 120.8                             | Mean | 79                         | 12929.6 | 429.6  | 30.1 | 53.02                                      | 2.88            | 0.0493      | 0.0080          | 0.0079     | 0.1288 | 0.0163                               | 0.0162 | 0.0189 | 0.0010          | 0.0010 | 0.42                     | 0.0058 | 0.0002      | 161.2    | 340.7   | 123.0 |
| 20107A49      | 120.8                             | Mean | 54                         | 5737.9  | 1338.6 | 4.3  | 53.44                                      | 1.77            | 0.0475      | 0.0047          | 0.0046     | 0.1286 | 0.0115                               | 0.0113 | 0.0187 | 0.0006          | 0.0006 | 0.33                     | 0.0059 | 0.0003      | 76.0     | 224.0   | 122.8 |
| 20107A54      | 120.8                             | Mean | 38                         | 4177.2  | 912.0  | 4.6  | 54.97                                      | 2.11            | 0.0482      | 0.0066          | 0.0066     | 0.1242 | 0.0134                               | 0.0132 | 0.0182 | 0.0007          | 0.0006 | 0.33                     | 0.0058 | 0.0004      | 109.4    | 296.3   | 118.9 |
| 20107A55      | 120.8                             | Mean | 48                         | 6050.9  | 923.7  | 6.6  | 52.46                                      | 1.96            | 0.0462      | 0.0062          | 0.0062     | 0.1330 | 0.0139                               | 0.0137 | 0.0191 | 0.0007          | 0.0007 | 0.33                     | 0.0059 | 0.0003      | 9.4      | 292.6   | 126.8 |
| 20107A56      | 120.8                             | Mean | 25                         | 1671.9  | 968.0  | 1.7  | 53.71                                      | 1.89            | 0.0527      | 0.0052          | 0.0052     | 0.1334 | 0.0130                               | 0.0128 | 0.0186 | 0.0007          | 0.0006 | 0.33                     | 0.0058 | 0.0005      | 322.3    | 225.9   | 127.2 |

| Analysis date | Final U-Pb ages (Ma) <sup>a</sup> |      | Concentration <sup>b</sup> |         |        | Th/U  | Data for Tera-Wasserburg plot <sup>c</sup> |      |             |        |            |        | Data for Wetherill plot <sup>c</sup> |        |        |        |        |          | 208Pb/232Th <sup>c</sup> |          | 207Pb/206Pb |       | 207Pb/2 |  |
|---------------|-----------------------------------|------|----------------------------|---------|--------|-------|--------------------------------------------|------|-------------|--------|------------|--------|--------------------------------------|--------|--------|--------|--------|----------|--------------------------|----------|-------------|-------|---------|--|
|               |                                   |      | Pb                         | Th      | U      |       | 238U/206Pb                                 |      | 207Pb/206Pb |        | 207Pb/235U |        | 206Pb/238U                           |        |        | Ratio  | 2σ     | Age (Ma) | 2σ                       | Age (Ma) |             |       |         |  |
|               |                                   |      | ppm                        |         |        | Ratio |                                            | 2σ*  |             | 2σ     |            | Ratio  | 2σ*                                  | 2σ     |        | rho    | Ratio  | 2σ       | Age (Ma)                 | 2σ       | Age (Ma)    |       |         |  |
| 20107A61      | 120.8                             | Mean | 45                         | 5583.3  | 885.7  | 6.3   | 51.39                                      | 1.98 | 0.0487      | 0.0065 | 0.0065     | 0.1284 | 0.0153                               | 0.0152 | 0.0195 | 0.0007 | 0.0007 | 0.30     | 0.0060                   | 0.0003   | 131.6       | 288.9 | 122.7   |  |
| 20107A62      | 120.8                             | Mean | 33                         | 993.5   | 1558.9 | 0.6   | 52.42                                      | 1.62 | 0.0477      | 0.0039 | 0.0038     | 0.1242 | 0.0094                               | 0.0092 | 0.0191 | 0.0006 | 0.0005 | 0.36     | 0.0057                   | 0.0007   | 87.1        | 177.8 | 118.9   |  |
| 20107A63      | 120.8                             | Mean | 30                         | 1743.2  | 1151.4 | 1.5   | 50.32                                      | 1.82 | 0.0499      | 0.0047 | 0.0047     | 0.1340 | 0.0114                               | 0.0113 | 0.0199 | 0.0007 | 0.0007 | 0.39     | 0.0060                   | 0.0005   | 187.1       | 207.4 | 127.7   |  |
| 20107A67      | 120.8                             | Mean | 59                         | 6692.6  | 1298.3 | 5.2   | 52.31                                      | 1.82 | 0.0506      | 0.0046 | 0.0046     | 0.1316 | 0.0113                               | 0.0112 | 0.0191 | 0.0007 | 0.0006 | 0.37     | 0.0059                   | 0.0003   | 233.4       | 10.2  | 125.5   |  |
| 20107A68      | 120.8                             | Mean | 38                         | 3982.8  | 913.7  | 4.4   | 53.09                                      | 1.87 | 0.0513      | 0.0054 | 0.0053     | 0.1332 | 0.0122                               | 0.0121 | 0.0188 | 0.0007 | 0.0006 | 0.35     | 0.0060                   | 0.0004   | 253.8       | 222.2 | 127.0   |  |
| 20107A69      | 120.8                             | Mean | 39                         | 4070.2  | 928.0  | 4.4   | 53.72                                      | 2.08 | 0.0523      | 0.0051 | 0.0050     | 0.1321 | 0.0122                               | 0.0120 | 0.0186 | 0.0007 | 0.0007 | 0.39     | 0.0059                   | 0.0004   | 298.2       | 220.3 | 126.0   |  |
| 24μm5J10Hz    |                                   |      |                            |         |        |       |                                            |      |             |        |            |        |                                      |        |        |        |        |          |                          |          |             |       |         |  |
| 20110C19      | 120.3                             | T-W  | 49                         | 2310.1  | 1143.4 | 2.0   | 47.82                                      | 1.93 | 0.0964      | 0.0119 | 0.0118     | 0.2896 | 0.0418                               | 0.0416 | 0.0209 | 0.0008 | 0.0008 | 0.26     | 0.0076                   | 0.0005   | 1554.6      | 231.6 | 258.2   |  |
| 20110C20      | 120.3                             | T-W  | 39                         | 2310.1  | 853.6  | 2.7   | 50.47                                      | 1.99 | 0.1091      | 0.0142 | 0.0141     | 0.3213 | 0.0426                               | 0.0424 | 0.0198 | 0.0008 | 0.0007 | 0.28     | 0.0069                   | 0.0004   | 1784.3      | 237.0 | 282.9   |  |
| 20110C25      | 120.3                             | T-W  | 80                         | 5709.1  | 1072.6 | 5.3   | 54.30                                      | 4.06 | 0.0547      | 0.0134 | 0.0134     | 0.1708 | 0.0613                               | 0.0612 | 0.0184 | 0.0014 | 0.0013 | 0.20     | 0.0059                   | 0.0006   | 398.2       | 474.0 | 160.1   |  |
| 20110C30      | 120.3                             | T-W  | 47                         | 3027.3  | 1323.8 | 2.3   | 52.81                                      | 1.65 | 0.0540      | 0.0038 | 0.0037     | 0.1408 | 0.0093                               | 0.0091 | 0.0189 | 0.0006 | 0.0005 | 0.42     | 0.0058                   | 0.0002   | 372.3       | 155.5 | 133.7   |  |
| 20110C5       | 119.7                             | Mean | 79                         | 5719.1  | 1676.9 | 3.4   | 52.29                                      | 1.69 | 0.0494      | 0.0045 | 0.0044     | 0.1338 | 0.0080                               | 0.0078 | 0.0191 | 0.0006 | 0.0005 | 0.49     | 0.0060                   | 0.0005   | 168.6       | 196.3 | 127.5   |  |
| 20110C6       | 119.7                             | Mean | 86                         | 6525.4  | 1872.6 | 3.5   | 53.18                                      | 1.53 | 0.0491      | 0.0029 | 0.0028     | 0.1273 | 0.0083                               | 0.0081 | 0.0188 | 0.0005 | 0.0005 | 0.39     | 0.0060                   | 0.0004   | 153.8       | 133.3 | 121.7   |  |
| 20110C7       | 119.7                             | Mean | 87                         | 6454.4  | 1865.2 | 3.5   | 53.60                                      | 1.61 | 0.0486      | 0.0027 | 0.0026     | 0.1251 | 0.0073                               | 0.0070 | 0.0187 | 0.0006 | 0.0005 | 0.46     | 0.0061                   | 0.0003   | 127.9       | 122.2 | 119.7   |  |
| 20110C11      | 119.7                             | Mean | 71                         | 4254.5  | 1798.7 | 2.4   | 52.85                                      | 1.48 | 0.0487      | 0.0034 | 0.0033     | 0.1287 | 0.0075                               | 0.0072 | 0.0189 | 0.0005 | 0.0004 | 0.42     | 0.0059                   | 0.0002   | 131.6       | 155.5 | 122.9   |  |
| 20110C12      | 119.7                             | Mean | 68                         | 4422.3  | 1747.7 | 2.5   | 53.81                                      | 1.41 | 0.0494      | 0.0028 | 0.0027     | 0.1245 | 0.0069                               | 0.0067 | 0.0186 | 0.0005 | 0.0004 | 0.40     | 0.0058                   | 0.0002   | 164.9       | 125.9 | 119.1   |  |
| 20110C13      | 119.7                             | Mean | 97                         | 10602.2 | 1258.7 | 8.4   | 54.08                                      | 1.62 | 0.0468      | 0.0040 | 0.0039     | 0.1283 | 0.0081                               | 0.0078 | 0.0185 | 0.0006 | 0.0005 | 0.42     | 0.0058                   | 0.0002   | 39.0        | 188.9 | 122.6   |  |
| 20110C18      | 119.7                             | Mean | 68                         | 4401.9  | 1778.9 | 2.5   | 54.07                                      | 1.62 | 0.0487      | 0.0032 | 0.0031     | 0.1242 | 0.0071                               | 0.0069 | 0.0185 | 0.0006 | 0.0005 | 0.46     | 0.0058                   | 0.0002   | 131.6       | 148.1 | 118.9   |  |
| 20110C24      | 119.7                             | Mean | 57                         | 4415.3  | 1303.2 | 3.4   | 52.94                                      | 1.63 | 0.0454      | 0.0038 | 0.0037     | 0.1188 | 0.0075                               | 0.0073 | 0.0189 | 0.0006 | 0.0005 | 0.44     | 0.0058                   | 0.0003   |             |       | 114.0   |  |
| 20110C26      | 119.7                             | Mean | 66                         | 5814.8  | 1239.2 | 4.7   | 53.85                                      | 1.57 | 0.0502      | 0.0039 | 0.0038     | 0.1286 | 0.0085                               | 0.0083 | 0.0186 | 0.0005 | 0.0005 | 0.38     | 0.0058                   | 0.0002   | 211.2       | 175.9 | 122.9   |  |
| 20110C31      | 119.7                             | Mean | 58                         | 5452.5  | 1071.3 | 5.1   | 52.88                                      | 1.79 | 0.0480      | 0.0040 | 0.0039     | 0.1239 | 0.0089                               | 0.0087 | 0.0189 | 0.0006 | 0.0006 | 0.43     | 0.0058                   | 0.0002   | 101.9       | 181.5 | 118.6   |  |
| 20110C32      | 119.7                             | Mean | 76                         | 6841.4  | 1497.1 | 4.6   | 52.92                                      | 1.45 | 0.0484      | 0.0028 | 0.0027     | 0.1260 | 0.0077                               | 0.0074 | 0.0189 | 0.0005 | 0.0004 | 0.39     | 0.0060                   | 0.0002   | 120.5       | 135.2 | 120.5   |  |
| 24μm10J5Hz    |                                   |      |                            |         |        |       |                                            |      |             |        |            |        |                                      |        |        |        |        |          |                          |          |             |       |         |  |
| 20110B13      | 118.4                             | T-W  | 30                         | 2643.4  | 562.2  | 4.7   | 53.57                                      | 1.67 | 0.0536      | 0.0048 | 0.0048     | 0.1432 | 0.0109                               | 0.0107 | 0.0187 | 0.0006 | 0.0005 | 0.36     | 0.0060                   | 0.0002   | 353.8       | 171.3 | 135.9   |  |
| 20110B20      | 118.4                             | T-W  | 22                         | 465.6   | 768.4  | 0.6   | 53.13                                      | 1.58 | 0.0629      | 0.0049 | 0.0048     | 0.1678 | 0.0129                               | 0.0127 | 0.0188 | 0.0006 | 0.0005 | 0.34     | 0.0068                   | 0.0006   | 705.6       | 130.5 | 157.5   |  |
| 20110B24      | 118.4                             | T-W  | 36                         | 3232.1  | 556.1  | 5.8   | 54.26                                      | 1.57 | 0.0542      | 0.0039 | 0.0038     | 0.1368 | 0.0093                               | 0.0090 | 0.0184 | 0.0005 | 0.0005 | 0.37     | 0.0060                   | 0.0002   | 388.9       | 155.5 | 130.2   |  |
| 20110B30      | 118.4                             | T-W  | 21                         | 1345.8  | 243.4  | 5.5   | 53.23                                      | 1.79 | 0.0549      | 0.0038 | 0.0037     | 0.1411 | 0.0100                               | 0.0098 | 0.0188 | 0.0006 | 0.0006 | 0.43     | 0.0057                   | 0.0002   | 405.6       | 147.2 | 134.0   |  |
| 20110B32      | 118.4                             | T-W  | 22                         | 886.6   | 300.1  | 3.0   | 52.94                                      | 1.50 | 0.0549      | 0.0038 | 0.0037     | 0.1436 | 0.0098                               | 0.0095 | 0.0189 | 0.0005 | 0.0005 | 0.36     | 0.0060                   | 0.0002   | 409.3       | 150.0 | 136.2   |  |
| 20110B5       | 119.4                             | Mean | 41                         | 4236.7  | 668.1  | 6.3   | 53.04                                      | 1.66 | 0.0521      | 0.0043 | 0.0042     | 0.1341 | 0.0106                               | 0.0104 | 0.0189 | 0.0006 | 0.0005 | 0.35     | 0.0058                   | 0.0002   | 287.1       | 182.4 | 127.8   |  |

| Analysis date | Final U-Pb ages (Ma) <sup>a</sup> |      | Concentration <sup>b</sup> |         |        | Th/U | Data for Tera-Wasserburg plot <sup>c</sup> |      |             |        |            |        | Data for Wetherill plot <sup>c</sup> |        |        |        |        |          | 208Pb/232Th <sup>c</sup> |          | 207Pb/206Pb |       | 207Pb/2  |  |
|---------------|-----------------------------------|------|----------------------------|---------|--------|------|--------------------------------------------|------|-------------|--------|------------|--------|--------------------------------------|--------|--------|--------|--------|----------|--------------------------|----------|-------------|-------|----------|--|
|               |                                   |      | Pb                         | Th      | U      |      | 238U/206Pb                                 |      | 207Pb/206Pb |        | 207Pb/235U |        | 206Pb/238U                           |        |        | Ratio  | 2σ     | Age (Ma) | 2σ                       | Age (Ma) |             |       |          |  |
|               |                                   |      | ppm                        |         |        |      | Ratio                                      | 2σ*  | Ratio       | 2σ*    | 2σ         | Ratio  | 2σ*                                  | 2σ     | Ratio  | 2σ*    | 2σ     | rho      | Ratio                    | 2σ       | Age (Ma)    | 2σ    | Age (Ma) |  |
| 20110B6       | 119.4                             | Mean | 48                         | 4641.1  | 790.9  | 5.9  | 53.64                                      | 1.64 | 0.0519      | 0.0044 | 0.0043     | 0.1307 | 0.0096                               | 0.0094 | 0.0186 | 0.0006 | 0.0005 | 0.37     | 0.0059                   | 0.0002   | 279.7       | 190.7 | 124.7    |  |
| 20110B7       | 119.4                             | Mean | 35                         | 1304.9  | 1244.3 | 1.0  | 53.18                                      | 1.43 | 0.0516      | 0.0033 | 0.0032     | 0.1341 | 0.0081                               | 0.0078 | 0.0188 | 0.0005 | 0.0004 | 0.38     | 0.0058                   | 0.0004   | 333.4       | 142.6 | 127.8    |  |
| 20110B11      | 119.4                             | Mean | 44                         | 3896.4  | 828.8  | 4.7  | 53.11                                      | 1.73 | 0.0522      | 0.0035 | 0.0034     | 0.1337 | 0.0090                               | 0.0087 | 0.0188 | 0.0006 | 0.0005 | 0.44     | 0.0059                   | 0.0002   | 294.5       | 119.4 | 127.4    |  |
| 20110B12      | 119.4                             | Mean | 40                         | 3767.9  | 703.4  | 5.4  | 52.96                                      | 1.66 | 0.0499      | 0.0039 | 0.0039     | 0.1282 | 0.0096                               | 0.0094 | 0.0189 | 0.0006 | 0.0005 | 0.37     | 0.0058                   | 0.0002   |             |       | 122.5    |  |
| 20110B18      | 119.4                             | Mean | 41                         | 3491.2  | 828.0  | 4.2  | 53.86                                      | 1.70 | 0.0512      | 0.0031 | 0.0030     | 0.1325 | 0.0077                               | 0.0074 | 0.0186 | 0.0006 | 0.0005 | 0.49     | 0.0058                   | 0.0002   | 250.1       | 133.3 | 126.3    |  |
| 20110B19      | 119.4                             | Mean | 123                        | 17306.1 | 392.6  | 44.1 | 53.70                                      | 1.90 | 0.0474      | 0.0055 | 0.0054     | 0.1262 | 0.0125                               | 0.0124 | 0.0186 | 0.0007 | 0.0006 | 0.33     | 0.0059                   | 0.0002   | 77.9        | 238.9 | 120.6    |  |
| 20110B25      | 119.4                             | Mean | 29                         | 2477.2  | 353.4  | 7.0  | 53.77                                      | 1.88 | 0.0519      | 0.0045 | 0.0044     | 0.1344 | 0.0121                               | 0.0120 | 0.0186 | 0.0006 | 0.0006 | 0.35     | 0.0060                   | 0.0002   | 283.4       | 194.4 | 128.1    |  |
| 20110B26      | 119.4                             | Mean | 21                         | 1052.4  | 507.8  | 2.1  | 54.79                                      | 1.75 | 0.0516      | 0.0035 | 0.0034     | 0.1303 | 0.0090                               | 0.0088 | 0.0183 | 0.0006 | 0.0005 | 0.41     | 0.0057                   | 0.0003   | 264.9       | 151.8 | 124.4    |  |
| 20110B31      | 119.4                             | Mean | 19                         | 1076.1  | 209.0  | 5.1  | 53.22                                      | 1.78 | 0.0530      | 0.0040 | 0.0039     | 0.1344 | 0.0090                               | 0.0088 | 0.0188 | 0.0006 | 0.0006 | 0.45     | 0.0057                   | 0.0002   | 331.5       | 166.6 | 128.1    |  |
| 24μm10J10Hz   |                                   |      |                            |         |        |      |                                            |      |             |        |            |        |                                      |        |        |        |        |          |                          |          |             |       |          |  |
| 20110A6       | 117.5                             | T-W  | 120                        | 18326.2 | 424.0  | 43.2 | 54.33                                      | 1.64 | 0.0719      | 0.0055 | 0.0054     | 0.1832 | 0.0137                               | 0.0134 | 0.0184 | 0.0006 | 0.0005 | 0.36     | 0.0055                   | 0.0001   | 983.3       | 154.2 | 170.8    |  |
| 20110A7       | 117.5                             | T-W  | 132                        | 20257.6 | 456.3  | 44.4 | 54.21                                      | 1.53 | 0.0669      | 0.0045 | 0.0044     | 0.1692 | 0.0115                               | 0.0112 | 0.0184 | 0.0005 | 0.0004 | 0.36     | 0.0055                   | 0.0001   | 835.2       | 134.3 | 158.8    |  |
| 20110A11      | 117.5                             | T-W  | 39                         | 1606.1  | 1264.0 | 1.3  | 52.66                                      | 1.28 | 0.0537      | 0.0026 | 0.0025     | 0.1398 | 0.0055                               | 0.0050 | 0.0190 | 0.0005 | 0.0004 | 0.53     | 0.0064                   | 0.0002   | 366.7       | 105.5 | 132.9    |  |
| 20110A19      | 117.5                             | T-W  | 75                         | 5467.3  | 1063.7 | 5.1  | 51.89                                      | 2.23 | 0.0642      | 0.0100 | 0.0099     | 0.1631 | 0.0276                               | 0.0275 | 0.0193 | 0.0008 | 0.0008 | 0.24     | 0.0057                   | 0.0003   | 750.0       | 336.1 | 153.4    |  |
| 20110A32      | 117.5                             | T-W  | 192                        | 28427.5 | 564.7  | 50.3 |                                            |      |             |        | 0.0028     | 0.1428 | 0.0080                               | 0.0077 | 0.0194 | 0.0006 | 0.0005 | 0.48     | 0.0058                   | 0.0001   | 366.7       | 123.1 | 135.5    |  |
| 20110A5       | 119.0                             | Mean | 42                         | 1704.7  | 1354.3 | 1.3  | 52.92                                      | 1.36 | 0.0470      | 0.0022 | 0.0021     | 0.1224 | 0.0053                               | 0.0049 | 0.0189 | 0.0005 | 0.0004 | 0.51     | 0.0059                   | 0.0002   | 50.1        | 103.7 | 117.2    |  |
| 20110A12      | 119.0                             | Mean | 38                         | 1572.6  | 1300.2 | 1.2  | 54.36                                      | 1.40 | 0.0496      | 0.0020 | 0.0018     | 0.1259 | 0.0054                               | 0.0051 | 0.0184 | 0.0005 | 0.0004 | 0.51     | 0.0059                   | 0.0002   | 176.0       | 80.5  | 120.4    |  |
| 20110A13      | 119.0                             | Mean | 43                         | 4160.3  | 634.6  | 6.6  | 53.03                                      | 1.54 | 0.0484      | 0.0029 | 0.0028     | 0.1242 | 0.0061                               | 0.0058 | 0.0189 | 0.0005 | 0.0005 | 0.53     | 0.0061                   | 0.0002   | 116.8       | 138.9 | 118.9    |  |
| 20110A18      | 119.0                             | Mean | 76                         | 6558.2  | 1443.0 | 4.5  | 52.45                                      | 1.43 | 0.0507      | 0.0023 | 0.0022     | 0.1330 | 0.0057                               | 0.0053 | 0.0191 | 0.0005 | 0.0004 | 0.57     | 0.0061                   | 0.0002   | 227.8       | 98.1  | 126.8    |  |
| 20110A20      | 119.0                             | Mean | 50                         | 997.7   | 2014.2 | 0.5  | 53.74                                      | 1.21 | 0.0485      | 0.0018 | 0.0016     | 0.1245 | 0.0048                               | 0.0044 | 0.0186 | 0.0004 | 0.0003 | 0.47     | 0.0058                   | 0.0003   | 124.2       | 77.8  | 119.1    |  |
| 20110A25      | 119.0                             | Mean | 44                         | 1683.5  | 1448.8 | 1.2  | 53.85                                      | 1.46 | 0.0493      | 0.0023 | 0.0021     | 0.1279 | 0.0055                               | 0.0052 | 0.0186 | 0.0005 | 0.0004 | 0.55     | 0.0060                   | 0.0002   | 161.2       | 101.8 | 122.2    |  |
| 20110A26      | 119.0                             | Mean | 44                         | 1808.3  | 1537.8 | 1.2  | 54.80                                      | 1.30 | 0.0483      | 0.0020 | 0.0019     | 0.1214 | 0.0046                               | 0.0043 | 0.0182 | 0.0004 | 0.0003 | 0.52     | 0.0057                   | 0.0002   | 122.3       | 95.4  | 116.4    |  |
| 20110A27      | 119.0                             | Mean | 44                         | 1744.9  | 1492.6 | 1.2  | 52.97                                      | 1.49 | 0.0488      | 0.0022 | 0.0020     | 0.1271 | 0.0053                               | 0.0049 | 0.0189 | 0.0005 | 0.0004 | 0.61     | 0.0059                   | 0.0002   | 139.0       | 98.1  | 121.5    |  |
| 20110A30      | 119.0                             | Mean | 65                         | 6587.2  | 992.1  | 6.6  | 54.98                                      | 1.51 | 0.0503      | 0.0027 | 0.0026     | 0.1261 | 0.0067                               | 0.0064 | 0.0182 | 0.0005 | 0.0004 | 0.45     | 0.0057                   | 0.0001   | 209.3       | 118.5 | 120.6    |  |
| 20110A31      | 119.0                             | Mean | 74                         | 6865.9  | 1151.4 | 6.0  | 53.00                                      | 1.45 | 0.0513      | 0.0021 | 0.0020     | 0.1326 | 0.0057                               | 0.0054 | 0.0189 | 0.0005 | 0.0004 | 0.56     | 0.0057                   | 0.0002   | 253.8       | 88.9  | 126.4    |  |
| 32μm3J5Hz3N2  |                                   |      |                            |         |        |      |                                            |      |             |        |            |        |                                      |        |        |        |        |          |                          |          |             |       |          |  |
| 11231_175     | 117.3                             | Mean | 48                         |         | 736.8  |      | 55.99                                      | 1.38 | 0.0490      | 0.0013 | 0.0011     | 0.1203 | 0.0034                               | 0.0029 | 0.0179 | 0.0004 | 0.0003 | 0.81     |                          |          | 146.4       | 51.8  | 115.4    |  |
| 11231_130     | 117.3                             | Mean | 53                         |         | 874.3  |      | 55.77                                      | 1.60 | 0.0484      | 0.0015 | 0.0013     | 0.1195 | 0.0043                               | 0.0039 | 0.0179 | 0.0005 | 0.0004 | 0.75     |                          |          | 120.5       | 67.6  | 114.6    |  |
| 11231_131     | 117.3                             | Mean | 51                         |         | 843.3  |      | 55.50                                      | 1.53 | 0.0490      | 0.0017 | 0.0015     | 0.1216 | 0.0045                               | 0.0041 | 0.0180 | 0.0005 | 0.0004 | 0.68     |                          |          | 150.1       | 70.4  | 116.5    |  |



| Analysis date | Final U-Pb ages (Ma) <sup>a</sup> |      | Concentration <sup>b</sup> |         |        | Th/U  | Data for Tera-Wasserburg plot <sup>c</sup> |        |             |        |        |            | Data for Wetherill plot <sup>c</sup> |        |            |        |        | 208Pb/232Th <sup>c</sup> |         | 207Pb/206Pb |       | 207Pb/2  |       |
|---------------|-----------------------------------|------|----------------------------|---------|--------|-------|--------------------------------------------|--------|-------------|--------|--------|------------|--------------------------------------|--------|------------|--------|--------|--------------------------|---------|-------------|-------|----------|-------|
|               |                                   |      | Pb                         | Th      | U      |       | 238U/206Pb                                 |        | 207Pb/206Pb |        |        | 207Pb/235U |                                      |        | 206Pb/238U |        |        | Ratio                    | 2σ      | Age (Ma)    | 2σ    | Age (Ma) |       |
|               |                                   |      | ppm                        |         |        |       | Ratio                                      | 2σ*    | Ratio       | 2σ*    | 2σ     | Ratio      | 2σ*                                  | 2σ     | Ratio      | 2σ*    | 2σ     |                          |         |             |       |          | rho   |
| 11231A93      | 117.3                             | Mean | 67                         |         | 1031.4 | 55.43 | 1.37                                       | 0.0486 | 0.0014      | 0.0012 | 0.1207 | 0.0043     | 0.0039                               | 0.0180 | 0.0004     | 0.0004 | 0.61   |                          |         | 127.9       | 61.1  | 115.7    |       |
| 11231A86      | 117.3                             | Mean | 30                         |         | 639.1  | 55.17 | 1.61                                       | 0.0465 | 0.0026      | 0.0025 | 0.1214 | 0.0054     | 0.0051                               | 0.0181 | 0.0005     | 0.0005 | 0.59   |                          |         | 33.4        | 116.7 | 116.3    |       |
| 11231A85      | 117.3                             | Mean | 37                         |         | 777.7  | 55.07 | 1.53                                       | 0.0470 | 0.0017      | 0.0015 | 0.1180 | 0.0044     | 0.0040                               | 0.0182 | 0.0005     | 0.0004 | 0.69   |                          |         | 55.7        | 68.5  | 113.3    |       |
| 11231_109     | 117.3                             | Mean | 43                         |         | 702.0  | 54.73 | 1.67                                       | 0.0480 | 0.0014      | 0.0012 | 0.1208 | 0.0045     | 0.0041                               | 0.0183 | 0.0006     | 0.0005 | 0.77   |                          |         | 101.9       | 61.1  | 115.8    |       |
| 11231_132     | 117.3                             | Mean | 45                         |         | 761.8  | 54.59 | 1.58                                       | 0.0503 | 0.0018      | 0.0016 | 0.1268 | 0.0052     | 0.0048                               | 0.0183 | 0.0005     | 0.0004 | 0.65   |                          |         | 209.3       | 74.1  | 121.2    |       |
| 11231A68      | 117.3                             | Mean | 46                         |         | 1089.2 | 54.58 | 1.51                                       | 0.0511 | 0.0017      | 0.0015 | 0.1286 | 0.0044     | 0.0039                               | 0.0183 | 0.0005     | 0.0004 | 0.76   |                          |         | 242.7       | 66.7  | 122.8    |       |
| 11231_153     | 117.3                             | Mean | 61                         |         | 106.8  | 54.49 | 1.63                                       | 0.0494 | 0.0015      | 0.0013 | 0.1250 | 0.0046     | 0.0042                               | 0.0184 | 0.0006     | 0.0005 | 0.76   |                          |         | 168.6       | 63.9  | 119.6    |       |
| 11231_176     | 117.3                             | Mean | 141                        |         | 433.5  | 54.40 | 1.44                                       | 0.0487 | 0.0016      | 0.0014 | 0.1231 | 0.0043     | 0.0039                               | 0.0184 | 0.0005     | 0.0004 | 0.69   |                          |         | 200.1       | 73.1  | 117.9    |       |
| 11231A28      | 117.3                             | Mean | 24                         |         | 1236.2 | 54.32 | 1.38                                       | 0.0489 | 0.0013      | 0.0010 | 0.1240 | 0.0038     | 0.0032                               | 0.0184 | 0.0005     | 0.0004 | 0.77   |                          |         | 142.7       | 45.4  | 118.7    |       |
| 11231A5       | 117.3                             | Mean | 162                        |         | 602.2  | 54.16 | 1.35                                       | 0.0507 | 0.0025      | 0.0023 | 0.1316 | 0.0050     | 0.0046                               | 0.0185 | 0.0005     | 0.0004 | 0.56   |                          |         | 227.8       | 107.4 | 125.5    |       |
| 11231_177     | 117.3                             | Mean | 120                        |         | 389.3  | 54.00 | 1.42                                       | 0.0493 | 0.0019      | 0.0017 | 0.1259 | 0.0043     | 0.0039                               | 0.0185 | 0.0005     | 0.0004 | 0.69   |                          |         | 164.9       | 79.6  | 120.4    |       |
| 11231A84      | 117.3                             | Mean | 146                        |         | 620.9  | 53.66 | 1.59                                       | 0.0483 | 0.0017      | 0.0015 | 0.1241 | 0.0052     | 0.0049                               | 0.0186 | 0.0006     | 0.0005 | 0.65   |                          |         | 122.3       | 74.1  | 118.8    |       |
| 11231A7       | 117.3                             | Mean | 129                        |         | 536.5  | 53.49 | 1.28                                       | 0.0476 | 0.0014      | 0.0012 | 0.1228 | 0.0042     | 0.0038                               | 0.0187 | 0.0004     | 0.0003 | 0.60   |                          |         | 79.7        | 59.3  | 117.6    |       |
| 11231A6       | 117.3                             | Mean | 128                        |         | 458.7  | 53.10 | 1.30                                       | 0.0491 | 0.0014      | 0.0012 | 0.1277 | 0.0044     | 0.0040                               | 0.0188 | 0.0005     | 0.0004 | 0.62   |                          |         | 153.8       | 54.6  | 122.0    |       |
| 11231A48      | 117.3                             | Mean | 97                         |         | 470.6  | 52.44 | 1.35                                       | 0.0474 | 0.0019      | 0.0018 | 0.1240 | 0.0041     | 0.0037                               | 0.0191 | 0.0005     | 0.0004 | 0.70   |                          |         | 77.9        | 88.9  | 118.7    |       |
| 11231A27      | 117.3                             | Mean | 139                        |         | 553.6  | 52.08 | 1.48                                       | 0.0478 | 0.0014      | 0.0012 | 0.1264 | 0.0045     | 0.0040                               | 0.0192 | 0.0005     | 0.0005 | 0.75   |                          |         | 100.1       | 61.1  | 120.8    |       |
| 32μm3J5Hz3N2  |                                   |      |                            |         |        |       |                                            |        |             |        |        |            |                                      |        |            |        |        |                          |         |             |       |          |       |
| 20112B06      | 120.4                             | T-W  | 75                         | 13077.4 | 538.1  | 24.3  | 53.33                                      | 1.21   | 0.0621      | 0.0032 | 0.0030 | 0.1598     | 0.0079                               | 0.0075 | 0.0188     | 0.0004 | 0.0003 | 0.36                     | 0.00574 | 0.00007     | 675.9 | 110.2    | 150.5 |
| 20112B12      | 120.4                             | T-W  | 38                         | 3920.7  | 961.2  | 4.1   | 53.02                                      | 1.16   | 0.0541      | 0.0030 | 0.0029 | 0.1506     | 0.0073                               | 0.0069 | 0.0189     | 0.0004 | 0.0003 | 0.34                     | 0.00591 | 0.00009     | 376.0 | 125.0    | 142.4 |
| 20112B25      | 120.4                             | T-W  | 36                         | 4365.4  | 807.4  | 5.4   | 52.24                                      | 1.06   | 0.0541      | 0.0025 | 0.0023 | 0.1427     | 0.0062                               | 0.0058 | 0.0191     | 0.0004 | 0.0003 | 0.33                     | 0.00568 | 0.00008     | 376.0 | 100.9    | 135.5 |
| 20112B31      | 120.4                             | T-W  | 36                         | 4569.0  | 715.4  | 6.4   | 52.03                                      | 1.08   | 0.0519      | 0.0026 | 0.0025 | 0.1411     | 0.0058                               | 0.0053 | 0.0192     | 0.0004 | 0.0003 | 0.37                     | 0.00584 | 0.00008     | 279.7 | 111.1    | 134.0 |
| 20112B05      | 121.4                             | Mean | 89                         | 15666.0 | 771.7  | 20.3  | 52.56                                      | 1.11   | 0.0521      | 0.0025 | 0.0023 | 0.1350     | 0.0060                               | 0.0057 | 0.0190     | 0.0004 | 0.0003 | 0.35                     | 0.00570 | 0.00007     | 300.1 | 103.7    | 128.6 |
| 20112B07      | 121.4                             | Mean | 76                         | 13126.8 | 624.0  | 21.0  | 52.85                                      | 1.19   | 0.0488      | 0.0025 | 0.0024 | 0.1264     | 0.0066                               | 0.0063 | 0.0189     | 0.0004 | 0.0003 | 0.33                     | 0.00573 | 0.00007     | 200.1 | 116.7    | 120.8 |
| 20112B11      | 121.4                             | Mean | 17                         | 1386.1  | 513.4  | 2.7   | 52.44                                      | 1.29   | 0.0469      | 0.0029 | 0.0028 | 0.1234     | 0.0066                               | 0.0063 | 0.0191     | 0.0005 | 0.0004 | 0.38                     | 0.00576 | 0.00011     | 42.7  | 146.3    | 118.2 |
| 20112B13      | 121.4                             | Mean | 39                         | 4224.4  | 1014.0 | 4.2   | 53.11                                      | 1.10   | 0.0452      | 0.0023 | 0.0022 | 0.1213     | 0.0048                               | 0.0044 | 0.0188     | 0.0004 | 0.0003 | 0.38                     | 0.00581 | 0.00008     |       |          | 116.2 |
| 20112B18      | 121.4                             | Mean | 30                         | 3413.6  | 721.1  | 4.7   | 52.27                                      | 1.09   | 0.0464      | 0.0022 | 0.0021 | 0.1219     | 0.0054                               | 0.0051 | 0.0191     | 0.0004 | 0.0003 | 0.34                     | 0.00571 | 0.00009     | 16.8  | 107.4    | 116.8 |
| 20112B19      | 121.4                             | Mean | 34                         | 4493.1  | 692.5  | 6.5   | 52.99                                      | 1.16   | 0.0498      | 0.0024 | 0.0022 | 0.1282     | 0.0061                               | 0.0058 | 0.0189     | 0.0004 | 0.0003 | 0.34                     | 0.00569 | 0.00008     | 187.1 | 105.5    | 122.5 |
| 20112B20      | 121.4                             | Mean | 31                         | 3762.0  | 633.4  | 5.9   | 53.33                                      | 1.16   | 0.0490      | 0.0025 | 0.0024 | 0.1243     | 0.0062                               | 0.0059 | 0.0188     | 0.0004 | 0.0003 | 0.32                     | 0.00574 | 0.00009     | 146.4 | 112.9    | 119.0 |
| 20112B24      | 121.4                             | Mean | 34                         | 4520.3  | 629.8  | 7.2   | 52.35                                      | 1.15   | 0.0495      | 0.0028 | 0.0027 | 0.1326     | 0.0064                               | 0.0061 | 0.0191     | 0.0004 | 0.0003 | 0.34                     | 0.00576 | 0.00008     | 172.3 | 128.7    | 126.5 |

| Analysis date | Final U-Pb ages (Ma) <sup>a</sup> |      | Concentration <sup>b</sup> |        |        | Th/U | Data for Tera-Wasserburg plot <sup>c</sup> |      |             |        |            |        | Data for Wetherill plot <sup>c</sup> |        |        |        |        | 208Pb/232Th <sup>c</sup> |         | 207Pb/206Pb |          | 207Pb/2 |          |
|---------------|-----------------------------------|------|----------------------------|--------|--------|------|--------------------------------------------|------|-------------|--------|------------|--------|--------------------------------------|--------|--------|--------|--------|--------------------------|---------|-------------|----------|---------|----------|
|               |                                   |      | Pb                         | Th     | U      |      | 238U/206Pb                                 |      | 207Pb/206Pb |        | 207Pb/235U |        | 206Pb/238U                           |        |        | Ratio  | 2σ     | Age (Ma)                 | 2σ      | Age (Ma)    |          |         |          |
|               |                                   |      | ppm                        |        |        |      | Ratio                                      | 2σ*  | Ratio       | 2σ*    | 2σ         | Ratio  | 2σ*                                  | 2σ     | Ratio  | 2σ*    | 2σ     | rho                      | Ratio   | 2σ          | Age (Ma) | 2σ      | Age (Ma) |
| 20112B26      | 121.4                             | Mean | 25                         | 3083.5 | 518.7  | 5.9  | 52.28                                      | 1.16 | 0.0490      | 0.0028 | 0.0027     | 0.1294 | 0.0068                               | 0.0065 | 0.0191 | 0.0004 | 0.0003 | 0.32                     | 0.00589 | 0.00010     | 150.1    | 131.5   | 123.6    |
| 20112B30      | 121.4                             | Mean | 16                         | 1317.9 | 482.4  | 2.7  | 52.58                                      | 1.21 | 0.0471      | 0.0027 | 0.0026     | 0.1224 | 0.0064                               | 0.0061 | 0.0190 | 0.0004 | 0.0003 | 0.35                     | 0.00588 | 0.00013     | 57.5     | 125.9   | 117.2    |
| 20112B32      | 121.4                             | Mean | 33                         | 4327.4 | 624.9  | 6.9  | 52.07                                      | 1.06 | 0.0499      | 0.0030 | 0.0029     | 0.1344 | 0.0062                               | 0.0059 | 0.0192 | 0.0004 | 0.0003 | 0.31                     | 0.00593 | 0.00008     | 190.8    | 132.4   | 128.0    |
| 32μm5J5Hz3N2  |                                   |      |                            |        |        |      |                                            |      |             |        |            |        |                                      |        |        |        |        |                          |         |             |          |         |          |
| 20102B19      | 121.2                             | T-W  |                            |        | 712.7  |      | 52.19                                      | 1.78 | 0.0495      | 0.0013 | 0.0011     | 0.1310 | 0.0045                               | 0.0040 | 0.0192 | 0.0007 | 0.0006 | 0.99                     |         |             | 172.3    | 58.3    | 125.0    |
| 20102B29      | 121.2                             | T-W  |                            |        | 815.4  |      |                                            |      |             |        | 0.0012     | 0.1326 | 0.0046                               | 0.0041 | 0.0188 | 0.0006 | 0.0005 | 0.84                     |         |             | 257.5    | 49.1    | 126.4    |
| 20102B52      | 121.2                             | T-W  |                            |        | 343.4  |      | 52.58                                      | 1.65 | 0.0508      | 0.0018 | 0.0016     | 0.1314 | 0.0048                               | 0.0043 | 0.0190 | 0.0006 | 0.0005 | 0.83                     |         |             | 231.6    | 75.9    | 125.3    |
| 20102B54      | 121.2                             | T-W  |                            |        | 737.7  |      | 52.66                                      | 1.66 | 0.0546      | 0.0040 | 0.0039     | 0.1470 | 0.0083                               | 0.0080 | 0.0190 | 0.0006 | 0.0005 | 0.51                     |         |             | 394.5    | 159.2   | 139.3    |
| 20102B5       | 118.8                             | Mean |                            |        | 1361.6 |      | 54.62                                      | 1.70 | 0.0475      | 0.0038 | 0.0037     | 0.1191 | 0.0057                               | 0.0054 | 0.0183 | 0.0006 | 0.0005 | 0.59                     |         |             | 76.0     | 177.8   | 114.2    |
| 20102B62      | 118.8                             | Mean |                            |        | 1443.4 |      | 53.51                                      | 1.21 | 0.0466      | 0.0029 | 0.0028     | 0.1209 | 0.0032                               | 0.0026 | 0.0187 | 0.0004 | 0.0003 | 0.77                     |         |             | 27.9     | 137.0   | 115.9    |
| 20102B30      | 118.8                             | Mean |                            |        | 500.8  |      | 54.17                                      | 1.69 | 0.0484      | 0.0012 | 0.0010     | 0.1217 | 0.0040                               | 0.0035 | 0.0185 | 0.0006 | 0.0005 | 0.94                     |         |             | 120.5    | 45.4    | 116.6    |
| 20102B42      | 118.8                             | Mean |                            |        | 908.4  |      | 53.72                                      | 1.38 | 0.0472      | 0.0019 | 0.0018     | 0.1256 | 0.0033                               | 0.0027 | 0.0186 | 0.0005 | 0.0004 | 0.96                     |         |             | 57.5     | 92.6    | 120.2    |
| 20102B6       | 118.8                             | Mean |                            |        | 1196.8 |      | 54.63                                      | 1.69 | 0.0483      | 0.0012 | 0.0010     | 0.1211 | 0.0040                               | 0.0035 | 0.0183 | 0.0006 | 0.0005 | 0.93                     |         |             | 122.3    | 50.0    | 116.1    |
| 20102B31      | 118.8                             | Mean |                            |        | 421.7  |      | 52.20                                      | 1.59 | 0.0482      | 0.0021 | 0.0020     | 0.1272 | 0.0046                               | 0.0041 | 0.0192 | 0.0006 | 0.0005 | 0.81                     |         |             | 109.4    | 100.9   | 121.6    |
| 20102B40      | 118.8                             | Mean |                            |        | 1038.0 |      | 53.02                                      | 1.22 | 0.0487      | 0.0036 | 0.0035     | 0.1262 | 0.0048                               | 0.0044 | 0.0189 | 0.0004 | 0.0003 | 0.49                     |         |             | 200.1    | 94.4    | 120.7    |
| 20102B41      | 118.8                             | Mean |                            |        | 639.8  |      | 54.26                                      | 1.59 | 0.0429      | 0.0034 | 0.0033     | 0.1239 | 0.0039                               | 0.0034 | 0.0184 | 0.0005 | 0.0005 | 0.91                     |         | error       |          |         | 118.6    |
| 20102B53      | 118.8                             | Mean |                            |        | 1195.6 |      | 54.39                                      | 1.38 | 0.0496      | 0.0016 | 0.0014     | 0.1239 | 0.0032                               | 0.0026 | 0.0184 | 0.0005 | 0.0004 | 0.96                     |         |             | 189.0    | 60.2    | 118.6    |
| 20102B63      | 118.8                             | Mean |                            |        | 1016.7 |      | 54.06                                      | 1.23 | 0.0470      | 0.0018 | 0.0017     | 0.1245 | 0.0032                               | 0.0026 | 0.0185 | 0.0004 | 0.0003 | 0.81                     |         |             | 55.7     | 144.4   | 119.2    |
| 20102B67      | 118.8                             | Mean |                            |        | 976.9  |      | 53.82                                      | 1.43 | 0.0486      | 0.0044 | 0.0043     | 0.1247 | 0.0073                               | 0.0070 | 0.0186 | 0.0005 | 0.0004 | 0.39                     |         |             | 127.9    | 192.6   | 119.3    |
| 20102B68      | 118.8                             | Mean |                            |        | 1529.1 |      | 53.27                                      | 1.19 | 0.0483      | 0.0019 | 0.0017     | 0.1251 | 0.0030                               | 0.0023 | 0.0188 | 0.0004 | 0.0003 | 0.88                     |         |             | 122.3    | 85.2    | 119.6    |
| 20102B69      | 118.8                             | Mean |                            |        | 1036.7 |      | 54.13                                      | 1.41 | 0.0474      | 0.0030 | 0.0029     | 0.1229 | 0.0036                               | 0.0030 | 0.0185 | 0.0005 | 0.0004 | 0.85                     |         |             | 77.9     | 131.5   | 117.7    |
| 32μm5J5Hz3N2  |                                   |      |                            |        |        |      |                                            |      |             |        |            |        |                                      |        |        |        |        |                          |         |             |          |         |          |
| 20112A05      | 118.3                             | Mean | 34                         | 4713   | 578.8  | 8.1  | 54.05                                      | 1.08 | 0.0500      | 0.0020 | 0.0019     | 0.1269 | 0.0053                               | 0.0049 | 0.0185 | 0.0004 | 0.0002 | 0.33                     | 0.00599 | 0.00007     | 194.5    | 87.0    | 121.3    |
| 20112A06      | 118.3                             | Mean | 39                         | 4839   | 801.9  | 6.0  | 54.43                                      | 1.05 | 0.0485      | 0.0020 | 0.0018     | 0.1252 | 0.0049                               | 0.0045 | 0.0184 | 0.0004 | 0.0002 | 0.33                     | 0.00584 | 0.00006     | 124.2    | 88.9    | 119.8    |
| 20112A07      | 118.3                             | Mean | 41                         | 5219   | 931.5  | 5.6  | 54.73                                      | 1.04 | 0.0457      | 0.0030 | 0.0030     | 0.1297 | 0.0042                               | 0.0037 | 0.0183 | 0.0003 | 0.0002 | 0.40                     | 0.00591 | 0.00006     |          |         | 123.8    |
| 20112A11      | 118.3                             | Mean | 16                         | 1353   | 482.4  | 2.8  | 53.44                                      | 1.13 | 0.0492      | 0.0024 | 0.0023     | 0.1306 | 0.0057                               | 0.0054 | 0.0187 | 0.0004 | 0.0003 | 0.35                     | 0.00593 | 0.00011     | 166.8    | 102.8   | 124.7    |
| 20112A12      | 118.3                             | Mean | 26                         | 2482   | 619.8  | 4.0  | 53.26                                      | 1.11 | 0.0490      | 0.0030 | 0.0029     | 0.1287 | 0.0052                               | 0.0048 | 0.0188 | 0.0004 | 0.0003 | 0.38                     | 0.00591 | 0.00010     | 150.1    | 137.0   | 122.9    |
| 20112A13      | 118.3                             | Mean | 37                         | 4469   | 730.2  | 6.1  | 54.64                                      | 1.17 | 0.0479      | 0.0025 | 0.0024     | 0.1218 | 0.0047                               | 0.0043 | 0.0183 | 0.0004 | 0.0003 | 0.42                     | 0.00598 | 0.00010     | 100.1    | 105.5   | 116.7    |
| 20112A18      | 118.3                             | Mean | 16                         | 1227   | 510.3  | 2.4  | 54.24                                      | 1.09 | 0.0511      | 0.0022 | 0.0020     | 0.1290 | 0.0051                               | 0.0047 | 0.0184 | 0.0004 | 0.0002 | 0.36                     | 0.00589 | 0.00010     | 242.7    | 90.7    | 123.2    |

| Analysis date | Final U-Pb ages (Ma) <sup>a</sup> |      | Concentration <sup>b</sup> |      |        | Th/U | Data for Tera-Wasserburg plot <sup>c</sup> |      |             |        |        |            | Data for Wetherill plot <sup>c</sup> |        |            |        |        |      | 208Pb/232Th <sup>c</sup> |         | 207Pb/206Pb |       | 207Pb/2 |          |
|---------------|-----------------------------------|------|----------------------------|------|--------|------|--------------------------------------------|------|-------------|--------|--------|------------|--------------------------------------|--------|------------|--------|--------|------|--------------------------|---------|-------------|-------|---------|----------|
|               |                                   |      | Pb                         | Th   | U      |      | 238U/206Pb                                 |      | 207Pb/206Pb |        |        | 207Pb/235U |                                      |        | 206Pb/238U |        |        | rho  | 208Pb/232Th <sup>c</sup> |         | 207Pb/206Pb |       | 207Pb/2 |          |
|               |                                   |      | ppm                        |      |        |      | Ratio                                      | 2σ*  | Ratio       | 2σ*    | 2σ     | Ratio      | 2σ*                                  | 2σ     | Ratio      | 2σ*    | 2σ     |      | Ratio                    | 2σ*     | 2σ          | Ratio | 2σ      | Age (Ma) |
| 20112A19      | 118.3                             | Mean | 16                         | 1358 | 471.0  | 2.9  | 54.35                                      | 1.08 | 0.0494      | 0.0022 | 0.0020 | 0.1237     | 0.0052                               | 0.0049 | 0.0184     | 0.0004 | 0.0002 | 0.32 | 0.00586                  | 0.00009 | 168.6       | 91.7  | 118.4   |          |
| 20112A20      | 118.3                             | Mean | 18                         | 2182 | 379.5  | 5.7  | 54.04                                      | 1.12 | 0.0538      | 0.0028 | 0.0027 | 0.1356     | 0.0058                               | 0.0054 | 0.0185     | 0.0004 | 0.0003 | 0.35 | 0.00601                  | 0.00008 | 364.9       | 108.3 | 129.1   |          |
| 20112A24      | 118.3                             | Mean | 20                         | 2732 | 348.9  | 7.8  | 54.24                                      | 1.20 | 0.0469      | 0.0026 | 0.0025 | 0.1241     | 0.0060                               | 0.0057 | 0.0184     | 0.0004 | 0.0003 | 0.35 | 0.00583                  | 0.00007 | 55.7        | 113.0 | 118.8   |          |
| 20112A25      | 118.3                             | Mean | 35                         | 4430 | 746.9  | 5.9  | 54.27                                      | 1.01 | 0.0465      | 0.0023 | 0.0022 | 0.1254     | 0.0047                               | 0.0043 | 0.0184     | 0.0003 | 0.0002 | 0.31 | 0.00604                  | 0.00007 | 33.4        | 166.6 | 119.9   |          |
| 20112A26      | 118.3                             | Mean | 26                         | 3234 | 575.7  | 5.6  | 52.92                                      | 1.05 | 0.0502      | 0.0024 | 0.0023 | 0.1308     | 0.0054                               | 0.0050 | 0.0189     | 0.0004 | 0.0002 | 0.34 | 0.00608                  | 0.00008 | 205.6       | 107.4 | 124.9   |          |
| 20112A30      | 118.3                             | Mean | 56                         | 7459 | 1099.4 | 6.8  | 53.61                                      | 1.01 | 0.0516      | 0.0018 | 0.0016 | 0.1319     | 0.0044                               | 0.0039 | 0.0187     | 0.0003 | 0.0002 | 0.36 | 0.00600                  | 0.00006 | 333.4       | 75.0  | 125.8   |          |
| 20112A31      | 118.3                             | Mean | 26                         | 3685 | 432.6  | 8.5  | 54.02                                      | 1.11 | 0.0490      | 0.0038 | 0.0037 | 0.1323     | 0.0054                               | 0.0050 | 0.0185     | 0.0004 | 0.0003 | 0.36 | 0.00598                  | 0.00007 | 146.4       | 170.3 | 126.2   |          |
| 20112A32      | 118.3                             | Mean | 36                         | 4847 | 625.2  | 7.8  | 53.37                                      | 1.08 | 0.0515      | 0.0024 | 0.0023 | 0.1320     | 0.0056                               | 0.0053 | 0.0187     | 0.0004 | 0.0002 | 0.33 | 0.00603                  | 0.00007 | 264.9       | 101.8 | 125.9   |          |
| 32μm3J5Hz     |                                   |      |                            |      |        |      |                                            |      |             |        |        |            |                                      |        |            |        |        |      |                          |         |             |       |         |          |
| 20107b18      | 119.6                             | T-W  | 42                         |      | 1435.9 |      | 52.61                                      | 1.37 | 0.0577      | 0.0040 | 0.0039 | 0.1507     | 0.0101                               | 0.0099 | 0.0190     | 0.0005 | 0.0004 | 0.32 |                          |         | 516.7       | 148.1 | 142.5   |          |
| 20107b30      | 119.6                             | T-W  | 42                         |      | 1428.6 |      | 51.98                                      | 1.36 | 0.0534      | 0.0045 | 0.0045 | 0.1450     | 0.0101                               | 0.0099 | 0.0192     | 0.0005 | 0.0004 | 0.31 |                          |         | 346.4       | 188.9 | 137.5   |          |
| 20107b20      | 119.6                             | T-W  | 80                         |      | 714.6  |      | 53.21                                      | 1.63 | 0.0535      | 0.0053 | 0.0052 | 0.1388     | 0.0112                               | 0.0110 | 0.0188     | 0.0006 | 0.0005 | 0.34 |                          |         | 350.1       | 222.2 | 132.0   |          |
| 20107b5       | 119.6                             | T-W  | 48                         |      | 1157.6 |      | 53.82                                      | 1.68 | 0.0518      | 0.0050 | 0.0050 | 0.1336     | 0.0120                               | 0.0118 | 0.0186     | 0.0006 | 0.0005 | 0.31 |                          |         | 276.0       | 222.2 | 127.4   |          |
| 20107b6       | 119.6                             | T-W  | 47                         |      | 951.0  |      | 55.28                                      | 2.70 | 0.0538      | 0.0057 | 0.0057 | 0.1308     | 0.0107                               | 0.0105 | 0.0181     | 0.0009 | 0.0008 | 0.58 |                          |         | 364.9       | 238.9 | 124.8   |          |
| 20107b13      | 119.6                             | T-W  | 60                         |      | 1444.6 |      | 53.27                                      | 1.41 | 0.0528      | 0.0037 | 0.0036 | 0.1361     | 0.0087                               | 0.0084 | 0.0188     | 0.0005 | 0.0004 | 0.35 |                          |         | 320.4       | 155.5 | 129.6   |          |
| 20107b25      | 120.4                             | Mean | 38                         |      | 1265.1 |      | 54.55                                      | 1.51 | 0.0474      | 0.0043 | 0.0042 | 0.1292     | 0.0083                               | 0.0081 | 0.0183     | 0.0005 | 0.0004 | 0.37 |                          |         | 77.9        | 255.5 | 123.4   |          |
| 20107b31      | 120.4                             | Mean | 87                         |      | 747.8  |      | 53.25                                      | 1.60 | 0.0469      | 0.0055 | 0.0054 | 0.1300     | 0.0108                               | 0.0106 | 0.0188     | 0.0006 | 0.0005 | 0.32 |                          |         | 42.7        | 255.5 | 124.1   |          |
| 20107b11      | 120.4                             | Mean | 52                         |      | 1662.9 |      | 53.11                                      | 1.49 | 0.0506      | 0.0040 | 0.0039 | 0.1293     | 0.0092                               | 0.0089 | 0.0188     | 0.0005 | 0.0004 | 0.34 |                          |         | 233.4       | 179.6 | 123.5   |          |
| 20107b24      | 120.4                             | Mean | 83                         |      | 702.5  |      | 53.78                                      | 1.67 | 0.0509      | 0.0060 | 0.0059 | 0.1275     | 0.0107                               | 0.0105 | 0.0186     | 0.0006 | 0.0005 | 0.33 |                          |         | 239.0       | 248.1 | 121.9   |          |
| 20107b26      | 120.4                             | Mean | 30                         |      | 573.6  |      | 51.82                                      | 1.72 | 0.0482      | 0.0056 | 0.0055 | 0.1259     | 0.0113                               | 0.0112 | 0.0193     | 0.0006 | 0.0006 | 0.33 |                          |         | 109.4       | 251.8 | 120.4   |          |
| 20107b32      | 120.4                             | Mean | 95                         |      | 799.4  |      | 51.38                                      | 1.54 | 0.0472      | 0.0060 | 0.0060 | 0.1268     | 0.0105                               | 0.0104 | 0.0195     | 0.0006 | 0.0005 | 0.32 |                          |         | 61.2        | 283.3 | 121.2   |          |
| 20107b7       | 120.4                             | Mean | 34                         |      | 1122.9 |      | 53.10                                      | 1.61 | 0.0501      | 0.0048 | 0.0047 | 0.1282     | 0.0102                               | 0.0100 | 0.0188     | 0.0006 | 0.0005 | 0.34 |                          |         | 211.2       | 194.4 | 122.5   |          |
| 20107b12      | 120.4                             | Mean | 44                         |      | 984.5  |      | 53.27                                      | 1.67 | 0.0487      | 0.0050 | 0.0049 | 0.1270     | 0.0108                               | 0.0106 | 0.0188     | 0.0006 | 0.0005 | 0.33 |                          |         | 200.1       | 166.6 | 121.4   |          |
| 20107b19      | 120.4                             | Mean | 87                         |      | 776.7  |      | 52.58                                      | 1.66 | 0.0490      | 0.0055 | 0.0055 | 0.1267     | 0.0102                               | 0.0101 | 0.0190     | 0.0006 | 0.0005 | 0.35 |                          |         | 146.4       | 244.4 | 121.1   |          |
| 32UM3J10HZ    |                                   |      |                            |      |        |      |                                            |      |             |        |        |            |                                      |        |            |        |        |      |                          |         |             |       |         |          |
| 20107B57      | 120.5                             | T-W  | 60                         |      | 1885.6 |      | 52.26                                      | 1.74 | 0.0548      | 0.0052 | 0.0051 | 0.1498     | 0.0130                               | 0.0128 | 0.0191     | 0.0006 | 0.0006 | 0.35 |                          |         | 405.6       | 211.1 | 141.7   |          |
| 20107B62      | 120.5                             | T-W  | 38                         |      | 1284.1 |      | 52.62                                      | 1.57 | 0.0545      | 0.0037 | 0.0036 | 0.1424     | 0.0090                               | 0.0087 | 0.0190     | 0.0006 | 0.0005 | 0.42 |                          |         | 390.8       | 182.4 | 135.2   |          |
| 20107B55      | 120.5                             | T-W  | 31                         |      | 811.7  |      | 52.93                                      | 2.04 | 0.0537      | 0.0063 | 0.0062 | 0.1403     | 0.0150                               | 0.0149 | 0.0189     | 0.0007 | 0.0007 | 0.33 |                          |         | 361.2       | 267.6 | 133.3   |          |
| 20107B42      | 121.7                             | Mean | 40                         |      | 602.0  |      | 54.00                                      | 3.29 | 0.0517      | 0.0103 | 0.0103 | 0.1339     | 0.0221                               | 0.0220 | 0.0185     | 0.0011 | 0.0011 | 0.36 |                          |         | 272.3       | 400.0 | 127.6   |          |

| Analysis date | Final U-Pb ages (Ma) <sup>a</sup> |      | Concentration <sup>b</sup> |        |        | Th/U  | Data for Tera-Wasserburg plot <sup>c</sup> |              |             |              |            | Data for Wetherill plot <sup>c</sup> |              |            |            |              | 208Pb/232Th <sup>c</sup> |       | 207Pb/206Pb  |            | 207Pb/2 |            |       |
|---------------|-----------------------------------|------|----------------------------|--------|--------|-------|--------------------------------------------|--------------|-------------|--------------|------------|--------------------------------------|--------------|------------|------------|--------------|--------------------------|-------|--------------|------------|---------|------------|-------|
|               |                                   |      | Pb                         | Th     | U      |       | 238U/206Pb                                 |              | 207Pb/206Pb |              |            | 207Pb/235U                           |              |            | 206Pb/238U |              |                          |       |              |            |         |            | rho   |
|               |                                   |      | ppm                        |        |        |       | Ratio                                      | 2 $\sigma$ * | Ratio       | 2 $\sigma$ * | 2 $\sigma$ | Ratio                                | 2 $\sigma$ * | 2 $\sigma$ | Ratio      | 2 $\sigma$ * | 2 $\sigma$               | Ratio | 2 $\sigma$ * | 2 $\sigma$ | Ratio   | 2 $\sigma$ |       |
| 20107B68      | 121.7                             | Mean | 28                         |        | 703.1  | 52.54 | 1.37                                       | 0.0524       | 0.0044      | 0.0044       | 0.1371     | 0.0107                               | 0.0105       | 0.0190     | 0.0005     | 0.0004       | 0.27                     |       |              | 301.9      | 190.7   | 130.4      |       |
| 20107B61      | 121.7                             | Mean | 111                        |        | 959.3  | 52.15 | 1.60                                       | 0.0512       | 0.0044      | 0.0043       | 0.1351     | 0.0098                               | 0.0096       | 0.0192     | 0.0006     | 0.0005       | 0.37                     |       |              | 250.1      | 187.9   | 128.6      |       |
| 20107B47      | 121.7                             | Mean | 93                         |        | 815.6  | 52.95 | 2.72                                       | 0.0466       | 0.0082      | 0.0082       | 0.1217     | 0.0167                               | 0.0166       | 0.0189     | 0.0010     | 0.0009       | 0.36                     |       |              | 33.4       | 433.3   | 116.6      |       |
| 20107B48      | 121.7                             | Mean | 52                         |        | 1489.5 | 53.36 | 2.58                                       | 0.0469       | 0.0063      | 0.0062       | 0.1215     | 0.0145                               | 0.0144       | 0.0187     | 0.0009     | 0.0009       | 0.39                     |       |              | 42.7       | 301.8   | 116.5      |       |
| 20107B63      | 121.7                             | Mean | 47                         |        | 1346.6 | 51.97 | 1.40                                       | 0.0500       | 0.0033      | 0.0032       | 0.1324     | 0.0084                               | 0.0081       | 0.0192     | 0.0005     | 0.0004       | 0.36                     |       |              | 194.5      | 154.6   | 126.3      |       |
| 20107B67      | 121.7                             | Mean | 27                         |        | 719.3  | 52.68 | 1.44                                       | 0.0505       | 0.0044      | 0.0043       | 0.1307     | 0.0107                               | 0.0105       | 0.0190     | 0.0005     | 0.0004       | 0.28                     |       |              | 216.7      | 200.0   | 124.7      |       |
| 20107B41      | 121.7                             | Mean | 56                         |        | 1315.4 | 52.34 | 3.15                                       | 0.0474       | 0.0083      | 0.0083       | 0.1252     | 0.0200                               | 0.0199       | 0.0191     | 0.0011     | 0.0011       | 0.37                     |       |              | 77.9       | 357.4   | 119.7      |       |
| 20107B56      | 121.7                             | Mean | 32                         |        | 847.1  | 52.51 | 1.93                                       | 0.0495       | 0.0054      | 0.0054       | 0.1297     | 0.0128                               | 0.0127       | 0.0190     | 0.0007     | 0.0006       | 0.34                     |       |              | 172.3      | 233.3   | 123.8      |       |
| 20107B69      | 121.7                             | Mean | 41                         |        | 1202.6 | 51.74 | 1.30                                       | 0.0494       | 0.0042      | 0.0042       | 0.1307     | 0.0086                               | 0.0083       | 0.0193     | 0.0005     | 0.0004       | 0.31                     |       |              | 168.6      | 185.2   | 124.7      |       |
| 20107B43      | 121.7                             | Mean | 55                         |        | 1254.3 | 53.82 | 3.08                                       | 0.0463       | 0.0076      | 0.0076       | 0.1237     | 0.0180                               | 0.0179       | 0.0186     | 0.0011     | 0.0010       | 0.38                     |       |              | 13.1       | 351.8   | 118.4      |       |
| 20107B49      | 121.7                             | Mean | 53                         |        | 1539.2 | 52.63 | 2.44                                       | 0.0480       | 0.0063      | 0.0062       | 0.1262     | 0.0146                               | 0.0144       | 0.0190     | 0.0009     | 0.0008       | 0.38                     |       |              | 98.2       | 290.7   | 120.7      |       |
| 20107B54      | 121.7                             | Mean | 23                         |        | 730.4  | 52.88 | 2.25                                       | 0.0480       | 0.0059      | 0.0059       | 0.1253     | 0.0151                               | 0.0150       | 0.0189     | 0.0008     | 0.0008       | 0.33                     |       |              | 101.9      | 266.6   | 119.9      |       |
| 32Um5J5HZ     |                                   |      |                            |        |        |       |                                            |              |             |              |            |                                      |              |            |            |              |                          |       |              |            |         |            |       |
| 20106a7       | 118.2                             | T-W  | 33                         | 2243   | 1099.8 | 2.0   | 53.38                                      | 1.54         | 0.0536      | 0.0052       | 0.0052     | 0.1361                               | 0.0094       | 0.0091     | 0.0187     | 0.0005       | 0.0005                   | 0.37  | 0.0058       | 0.0003     | 353.8   | 223.1      | 129.6 |
| 20106a12      | 118.2                             | T-W  | 30                         | 2020   | 1014.0 | 2.0   | 53.79                                      | 1.63         | 0.0555      | 0.0049       | 0.0049     | 0.1422                               | 0.0113       | 0.0111     | 0.0186     | 0.0006       | 0.0005                   | 0.33  | 0.0059       | 0.0003     | 431.5   | 191.6      | 135.0 |
| 20106a26      | 118.2                             | T-W  | 37                         | 3890   | 802.5  | 4.8   | 54.01                                      | 1.66         | 0.0522      | 0.0047       | 0.0047     | 0.1319                               | 0.0101       | 0.0099     | 0.0185     | 0.0006       | 0.0005                   | 0.36  | 0.0059       | 0.0003     | 294.5   | 205.5      | 125.8 |
| 20106a38      | 118.2                             | T-W  | 32                         | 1548   | 910.6  | 1.7   | 53.64                                      | 1.57         | 0.0523      | 0.0043       | 0.0043     | 0.1373                               | 0.0101       | 0.0099     | 0.0186     | 0.0005       | 0.0005                   | 0.34  | 0.0056       | 0.0004     | 298.2   | 187.0      | 130.6 |
| 20106a20      | 118.5                             | Mean | 35                         | 2645.1 | 968.3  | 2.7   | 53.08                                      | 1.56         | 0.0477      | 0.0050       | 0.0050     | 0.1240                               | 0.0080       | 0.0077     | 0.0188     | 0.0006       | 0.0005                   | 0.40  | 0.0064       | 0.0003     | 83.4    | 238.9      | 118.7 |
| 20106a31      | 118.5                             | Mean | 22                         | 2515.9 | 379.8  | 6.6   | 54.92                                      | 2.12         | 0.0521      | 0.0060       | 0.0059     | 0.1274                               | 0.0135       | 0.0133     | 0.0182     | 0.0007       | 0.0006                   | 0.34  | 0.0062       | 0.0003     | 300.1   | 261.1      | 121.7 |
| 20106a5       | 118.5                             | Mean | 30                         | 3027.2 | 730.5  | 4.1   | 55.12                                      | 1.86         | 0.0498      | 0.0057       | 0.0057     | 0.1235                               | 0.0111       | 0.0110     | 0.0181     | 0.0006       | 0.0005                   | 0.34  | 0.0059       | 0.0003     | 187.1   | 244.4      | 118.3 |
| 20106a6       | 118.5                             | Mean | 24                         | 2743.9 | 532.2  | 5.2   | 53.85                                      | 1.97         | 0.0509      | 0.0050       | 0.0049     | 0.1268                               | 0.0115       | 0.0113     | 0.0186     | 0.0007       | 0.0006                   | 0.37  | 0.0058       | 0.0003     | 235.3   | 220.4      | 121.2 |
| 20106a13      | 118.5                             | Mean | 27                         | 1940.8 | 870.5  | 2.2   | 53.41                                      | 1.60         | 0.0511      | 0.0036       | 0.0035     | 0.1310                               | 0.0089       | 0.0087     | 0.0187     | 0.0006       | 0.0005                   | 0.39  | 0.0059       | 0.0004     | 242.7   | 159.2      | 125.0 |
| 20106a14      | 118.5                             | Mean | 45                         | 4720.0 | 970.1  | 4.9   | 54.18                                      | 1.50         | 0.0476      | 0.0039       | 0.0038     | 0.1232                               | 0.0081       | 0.0079     | 0.0185     | 0.0005       | 0.0004                   | 0.36  | 0.0058       | 0.0002     | 79.7    | 181.5      | 118.0 |
| 20106a18      | 118.5                             | Mean | 47                         | 4728.9 | 1021.0 | 4.6   | 54.39                                      | 1.50         | 0.0481      | 0.0041       | 0.0040     | 0.1256                               | 0.0094       | 0.0092     | 0.0184     | 0.0005       | 0.0004                   | 0.31  | 0.0059       | 0.0002     | 101.9   | 198.1      | 120.1 |
| 20106a19      | 118.5                             | Mean | 29                         | 2091.3 | 902.4  | 2.3   | 53.80                                      | 1.42         | 0.0493      | 0.0043       | 0.0042     | 0.1263                               | 0.0097       | 0.0095     | 0.0186     | 0.0005       | 0.0004                   | 0.29  | 0.0059       | 0.0003     | 161.2   | 188.9      | 120.8 |
| 20106a24      | 118.5                             | Mean | 54                         | 6650.5 | 958.6  | 6.9   | 54.53                                      | 1.42         | 0.0510      | 0.0044       | 0.0044     | 0.1282                               | 0.0103       | 0.0101     | 0.0183     | 0.0005       | 0.0004                   | 0.27  | 0.0055       | 0.0002     | 239.0   | 202.8      | 122.4 |
| 20106a25      | 118.5                             | Mean | 40                         | 2861.6 | 1215.3 | 2.4   | 53.28                                      | 1.43         | 0.0457      | 0.0036       | 0.0036     | 0.1181                               | 0.0089       | 0.0088     | 0.0188     | 0.0005       | 0.0004                   | 0.30  | 0.0060       | 0.0003     | error   |            | 113.3 |
| 20106a32      | 118.5                             | Mean | 35                         | 2196.5 | 1100.8 | 2.0   | 53.58                                      | 1.40         | 0.0459      | 0.0036       | 0.0036     | 0.1174                               | 0.0089       | 0.0087     | 0.0187     | 0.0005       | 0.0004                   | 0.29  | 0.0059       | 0.0003     | error   |            | 112.7 |
| 20106a33      | 118.5                             | Mean | 25                         | 1570.2 | 792.3  | 2.0   | 54.06                                      | 1.64         | 0.0481      | 0.0041       | 0.0040     | 0.1265                               | 0.0097       | 0.0095     | 0.0185     | 0.0006       | 0.0005                   | 0.35  | 0.0059       | 0.0004     | 105.6   | 194.4      | 120.9 |



| Analysis date | Final U-Pb ages (Ma) <sup>a</sup> |      | Concentration <sup>b</sup> |         |        | Th/U | Data for Tera-Wasserburg plot <sup>c</sup> |      |             |        |            |        | Data for Wetherill plot <sup>c</sup> |        |        |        |        | 208Pb/232Th <sup>c</sup> |        | 207Pb/206Pb |          | 207Pb/2 |          |
|---------------|-----------------------------------|------|----------------------------|---------|--------|------|--------------------------------------------|------|-------------|--------|------------|--------|--------------------------------------|--------|--------|--------|--------|--------------------------|--------|-------------|----------|---------|----------|
|               |                                   |      | Pb                         | Th      | U      |      | 238U/206Pb                                 |      | 207Pb/206Pb |        | 207Pb/235U |        | 206Pb/238U                           |        |        | Ratio  | 2σ     | Age (Ma)                 | 2σ     | Age (Ma)    |          |         |          |
|               |                                   |      | ppm                        |         |        |      | Ratio                                      | 2σ*  | Ratio       | 2σ*    | 2σ         | Ratio  | 2σ*                                  | 2σ     | Ratio  | 2σ*    | 2σ     | rho                      | Ratio  | 2σ          | Age (Ma) | 2σ      | Age (Ma) |
| 20111A19      | 119.9                             | Mean | 43                         | 3030.4  | 1272.6 | 2.4  | 53.32                                      | 1.37 | 0.0483      | 0.0022 | 0.0020     | 0.1244 | 0.0054                               | 0.0050 | 0.0188 | 0.0005 | 0.0004 | 0.51                     | 0.0058 | 0.0002      | 122.3    | 100.0   | 119.0    |
| 20111A20      | 119.9                             | Mean | 27                         | 2069.5  | 734.8  | 2.8  | 52.89                                      | 1.55 | 0.0490      | 0.0039 | 0.0038     | 0.1298 | 0.0079                               | 0.0077 | 0.0189 | 0.0006 | 0.0005 | 0.42                     | 0.0058 | 0.0002      | 150.1    | 174.0   | 123.9    |
| 20111A24      | 119.9                             | Mean | 65                         | 8883.3  | 554.9  | 16.0 | 53.63                                      | 1.49 | 0.0487      | 0.0035 | 0.0034     | 0.1254 | 0.0077                               | 0.0075 | 0.0186 | 0.0005 | 0.0004 | 0.39                     | 0.0058 | 0.0001      | 200.1    | 100.0   | 120.0    |
| 20111A25      | 119.9                             | Mean | 80                         | 11614.4 | 633.9  | 18.3 | 52.32                                      | 1.41 | 0.0471      | 0.0037 | 0.0037     | 0.1228 | 0.0073                               | 0.0071 | 0.0191 | 0.0005 | 0.0004 | 0.38                     | 0.0060 | 0.0002      | 53.8     | 174.0   | 117.6    |
| 20111A26      | 119.9                             | Mean | 23                         | 2204.8  | 538.1  | 4.1  | 53.34                                      | 1.36 | 0.0492      | 0.0033 | 0.0032     | 0.1267 | 0.0083                               | 0.0080 | 0.0187 | 0.0005 | 0.0004 | 0.32                     | 0.0057 | 0.0002      | 166.8    | 135.2   | 121.1    |
| 20111A30      | 119.9                             | Mean | 42                         | 2983.8  | 1243.3 | 2.4  | 52.44                                      | 1.28 | 0.0479      | 0.0022 | 0.0021     | 0.1254 | 0.0057                               | 0.0053 | 0.0191 | 0.0005 | 0.0004 | 0.45                     | 0.0059 | 0.0002      | 94.5     | 100.0   | 120.0    |
| 20111A31      | 119.9                             | Mean | 31                         | 1948.9  | 898.4  | 2.2  | 54.56                                      | 1.54 | 0.0500      | 0.0051 | 0.0050     | 0.1297 | 0.0090                               | 0.0088 | 0.0183 | 0.0005 | 0.0004 | 0.35                     | 0.0059 | 0.0002      | 198.2    | 214.8   | 123.8    |
| 20111A32      | 119.9                             | Mean | 37                         | 2321.0  | 1192.0 | 1.9  | 52.57                                      | 1.36 | 0.0471      | 0.0024 | 0.0023     | 0.1259 | 0.0063                               | 0.0060 | 0.0190 | 0.0005 | 0.0004 | 0.44                     | 0.0057 | 0.0002      | 57.5     | 114.8   | 120.4    |
| 32UM10J10HZ   |                                   |      |                            |         |        |      |                                            |      |             |        |            |        |                                      |        |        |        |        |                          |        |             |          |         |          |
| 20110D7       | 118.7                             | T-W  | 41                         | 2687.3  | 888.2  | 3.0  | 52.00                                      | 1.22 | 0.0691      | 0.0083 | 0.0082     | 0.1916 | 0.0187                               | 0.0185 | 0.0192 | 0.0005 | 0.0003 | 0.19                     | 0.0068 | 0.0002      | 901.9    | 246.8   | 178.0    |
| 20110D13      | 118.7                             | T-W  | 243                        | 36999.8 | 614.1  | 60.3 | 55.08                                      | 1.34 | 0.0423      | 0.0037 | 0.0037     | 0.1181 | 0.0066                               | 0.0063 | 0.0182 | 0.0004 | 0.0003 | 0.35                     | 0.0054 | 0.0001      | error    | error   | 113.3    |
| 20110D20      | 118.7                             | T-W  | 53                         | 4672.0  | 951.5  | 4.9  | 53.82                                      | 1.15 | 0.0509      | 0.0048 | 0.0047     | 0.1299 | 0.0053                               | 0.0049 | 0.0186 | 0.0004 | 0.0003 | 0.40                     | 0.0058 | 0.0002      | 239.0    | 214.8   | 124.0    |
| 20110D26      | 118.7                             | T-W  | 216                        | 33056.9 | 582.8  | 56.7 | 53.20                                      | 1.31 | 0.0517      | 0.0039 | 0.0038     | 0.1334 | 0.0058                               | 0.0055 | 0.0188 | 0.0005 | 0.0004 | 0.47                     | 0.0052 | 0.0001      | 272.3    | 168.5   | 127.2    |
| 20110D32      | 118.7                             | T-W  | 37                         | 1698.6  | 711.3  | 2.4  | 52.75                                      | 2.22 | 0.0525      | 0.0121 | 0.0120     | 0.1207 | 0.0326                               | 0.0326 | 0.0190 | 0.0008 | 0.0007 | 0.15                     | 0.0092 | 0.0007      | 305.6    | 461.1   | 115.7    |
| 20110D5       | 118.9                             | Mean | 56                         | 3595.0  | 1525.8 | 2.4  | 53.45                                      | 1.13 | 0.0494      | 0.0017 | 0.0016     | 0.1268 | 0.0042                               | 0.0038 | 0.0187 | 0.0004 | 0.0003 | 0.49                     | 0.0059 | 0.0001      | 164.9    | 75.9    | 121.3    |
| 20110D6       | 118.9                             | Mean | 43                         | 3524.8  | 921.2  | 3.8  | 53.58                                      | 1.20 | 0.0492      | 0.0028 | 0.0026     | 0.1264 | 0.0072                               | 0.0070 | 0.0187 | 0.0004 | 0.0003 | 0.30                     | 0.0059 | 0.0001      | 166.8    | 123.1   | 120.9    |
| 20110D11      | 118.9                             | Mean | 44                         | 3115.3  | 1065.2 | 2.9  | 54.21                                      | 1.18 | 0.0490      | 0.0018 | 0.0016     | 0.1246 | 0.0049                               | 0.0045 | 0.0184 | 0.0004 | 0.0003 | 0.43                     | 0.0059 | 0.0001      | 146.4    | 71.3    | 119.3    |
| 20110D12      | 118.9                             | Mean | 54                         | 3410.1  | 1395.7 | 2.4  | 53.67                                      | 1.26 | 0.0506      | 0.0023 | 0.0021     | 0.1313 | 0.0051                               | 0.0047 | 0.0186 | 0.0004 | 0.0003 | 0.49                     | 0.0059 | 0.0001      | 233.4    | 98.1    | 125.2    |
| 20110D18      | 118.9                             | Mean | 51                         | 4333.6  | 923.9  | 4.7  | 53.05                                      | 1.20 | 0.0480      | 0.0021 | 0.0019     | 0.1244 | 0.0051                               | 0.0048 | 0.0189 | 0.0004 | 0.0003 | 0.43                     | 0.0058 | 0.0001      | 98.2     | 92.6    | 119.0    |
| 20110D24      | 118.9                             | Mean | 54                         | 3260.1  | 1418.9 | 2.3  | 54.17                                      | 1.17 | 0.0503      | 0.0019 | 0.0017     | 0.1281 | 0.0055                               | 0.0051 | 0.0185 | 0.0004 | 0.0003 | 0.38                     | 0.0058 | 0.0001      | 209.3    | 77.8    | 122.4    |
| 20110D25      | 118.9                             | Mean | 55                         | 3385.6  | 1444.2 | 2.3  | 53.62                                      | 1.17 | 0.0505      | 0.0017 | 0.0015     | 0.1294 | 0.0043                               | 0.0038 | 0.0186 | 0.0004 | 0.0003 | 0.52                     | 0.0059 | 0.0001      | 216.7    | 68.5    | 123.6    |
| 20110D30      | 118.9                             | Mean | 60                         | 4202.7  | 1213.7 | 3.5  | 53.40                                      | 1.47 | 0.0481      | 0.0035 | 0.0035     | 0.1317 | 0.0052                               | 0.0048 | 0.0187 | 0.0005 | 0.0004 | 0.63                     | 0.0063 | 0.0002      | 101.9    | 162.9   | 125.6    |
| 20110D31      | 118.9                             | Mean | 57                         | 3378.8  | 1500.6 | 2.3  | 54.01                                      | 1.26 | 0.0503      | 0.0015 | 0.0013     | 0.1281 | 0.0041                               | 0.0036 | 0.0185 | 0.0004 | 0.0003 | 0.64                     | 0.0059 | 0.0001      | 209.3    | 93.5    | 122.4    |
| 44UM3J5HZ     |                                   |      |                            |         |        |      |                                            |      |             |        |            |        |                                      |        |        |        |        |                          |        |             |          |         |          |
| 20303C21      | 119.4                             | T-W  |                            |         | 1174.3 |      | 51.56                                      | 1.17 | 0.0671      | 0.0060 | 0.0059     | 0.1810 | 0.0160                               | 0.0157 | 0.0194 | 0.0004 | 0.0003 | 0.19                     |        |             | 838.9    | 185.2   | 169.0    |
| 20303C6       | 119.4                             | T-W  |                            |         | 679.9  |      | 52.21                                      | 1.48 | 0.0804      | 0.0067 | 0.0066     | 0.2145 | 0.0199                               | 0.0197 | 0.0192 | 0.0005 | 0.0005 | 0.26                     |        |             | 1242.6   | 157.6   | 197.4    |
| 20303C20      | 119.4                             | T-W  |                            |         | 459.2  |      | 52.31                                      | 1.60 | 0.0664      | 0.0046 | 0.0045     | 0.1787 | 0.0120                               | 0.0117 | 0.0191 | 0.0006 | 0.0005 | 0.40                     |        |             | 816.7    | 110.2   | 166.9    |
| 20303C24      | 119.4                             | T-W  |                            |         | 597.2  |      | 52.41                                      | 1.58 | 0.0554      | 0.0044 | 0.0044     | 0.1563 | 0.0093                               | 0.0090 | 0.0191 | 0.0006 | 0.0005 | 0.45                     |        |             | 431.5    | 169.4   | 147.5    |
| 20303C7       | 119.4                             | T-W  |                            |         | 921.0  |      | 53.51                                      | 1.37 | 0.0546      | 0.0035 | 0.0034     | 0.1493 | 0.0081                               | 0.0078 | 0.0187 | 0.0005 | 0.0004 | 0.39                     |        |             | 398.2    | 138.9   | 141.3    |

| Analysis date | Final U-Pb ages (Ma) <sup>a</sup> |      | Concentration <sup>b</sup> |    |        | Th/U  | Data for Tera-Wasserburg plot <sup>c</sup> |        |             |        |        | Data for Wetherill plot <sup>c</sup> |        |        |            |        | 208Pb/232Th <sup>c</sup> |       | 207Pb/206Pb |          | 207Pb/2 |          |
|---------------|-----------------------------------|------|----------------------------|----|--------|-------|--------------------------------------------|--------|-------------|--------|--------|--------------------------------------|--------|--------|------------|--------|--------------------------|-------|-------------|----------|---------|----------|
|               |                                   |      | Pb                         | Th | U      |       | 238U/206Pb                                 |        | 207Pb/206Pb |        |        | 207Pb/235U                           |        |        | 206Pb/238U |        |                          | Ratio | 2σ          | Age (Ma) | 2σ      | Age (Ma) |
|               |                                   |      | ppm                        |    |        |       | Ratio                                      | 2σ*    | Ratio       | 2σ*    | 2σ     | Ratio                                | 2σ*    | 2σ     | Ratio      | 2σ*    | 2σ                       |       |             |          |         |          |
| 20303C5       | 120.2                             | Mean |                            |    | 469.1  | 52.18 | 1.25                                       | 0.0533 | 0.0028      | 0.0027 | 0.1410 | 0.0076                               | 0.0073 | 0.0192 | 0.0005     | 0.0004 | 0.36                     |       |             | 309.3    | 121.3   | 133.9    |
| 20303C23      | 120.2                             | Mean |                            |    | 814.0  | 52.24 | 1.40                                       | 0.0528 | 0.0033      | 0.0032 | 0.1408 | 0.0074                               | 0.0070 | 0.0191 | 0.0005     | 0.0004 | 0.44                     |       |             | 322.3    | 137.0   | 133.8    |
| 20303C12      | 120.2                             | Mean |                            |    | 781.4  | 52.81 | 1.41                                       | 0.0511 | 0.0035      | 0.0034 | 0.1385 | 0.0086                               | 0.0083 | 0.0189 | 0.0005     | 0.0004 | 0.36                     |       |             | 242.7    | 153.7   | 131.7    |
| 20303C22      | 120.2                             | Mean |                            |    | 878.0  | 52.38 | 1.50                                       | 0.0541 | 0.0029      | 0.0028 | 0.1403 | 0.0071                               | 0.0068 | 0.0191 | 0.0005     | 0.0005 | 0.50                     |       |             | 376.0    | 116.7   | 133.3    |
| 20303C18      | 120.2                             | Mean |                            |    | 1064.2 | 54.39 | 1.31                                       | 0.0519 | 0.0027      | 0.0026 | 0.1322 | 0.0069                               | 0.0066 | 0.0184 | 0.0004     | 0.0003 | 0.37                     |       |             | 283.4    | 114.8   | 126.0    |
| 20303C19      | 120.2                             | Mean |                            |    | 1170.8 | 54.14 | 1.27                                       | 0.0505 | 0.0025      | 0.0023 | 0.1290 | 0.0064                               | 0.0061 | 0.0185 | 0.0004     | 0.0003 | 0.38                     |       |             | 233.4    | 104.6   | 123.2    |
| 20303C17      | 120.2                             | Mean |                            |    | 1109.4 | 54.14 | 1.34                                       | 0.0472 | 0.0025      | 0.0024 | 0.1175 | 0.0060                               | 0.0058 | 0.0185 | 0.0005     | 0.0004 | 0.40                     |       |             | 16.8     | 183.3   | 112.8    |
| 20303C10      | 120.2                             | Mean |                            |    | 1119.4 | 53.45 | 1.42                                       | 0.0497 | 0.0026      | 0.0025 | 0.1292 | 0.0063                               | 0.0059 | 0.0187 | 0.0005     | 0.0004 | 0.47                     |       |             | 189.0    | 121.3   | 123.4    |
| 20303C8       | 120.2                             | Mean |                            |    | 1002.3 | 52.09 | 1.27                                       | 0.0482 | 0.0024      | 0.0023 | 0.1259 | 0.0064                               | 0.0061 | 0.0192 | 0.0005     | 0.0004 | 0.39                     |       |             | 109.4    | 107.4   | 120.4    |
| 44UM5J5HZ     |                                   |      |                            |    |        |       |                                            |        |             |        |        |                                      |        |        |            |        |                          |       |             |          |         |          |
| 20303d11      | 120.8                             | T-W  |                            |    | 356.9  | 52.60 | 2.07                                       | 0.0660 | 0.0054      | 0.0053 | 0.1719 | 0.0130                               | 0.0127 | 0.0190 | 0.0007     | 0.0007 | 0.49                     |       |             | 807.1    | 170.4   | 161.0    |
| 20303d23      | 120.8                             | T-W  |                            |    | 490.8  | 52.42 | 1.26                                       | 0.0636 | 0.0043      | 0.0042 | 0.1681 | 0.0111                               | 0.0108 | 0.0191 | 0.0005     | 0.0004 | 0.29                     |       |             | 727.8    | 141.8   | 157.7    |
| 20303d8       | 120.8                             | T-W  |                            |    | 891.7  | 53.98 | 2.94                                       | 0.0613 | 0.0066      | 0.0065 | 0.1564 | 0.0155                               | 0.0153 | 0.0185 | 0.0010     | 0.0010 | 0.54                     |       |             | 650.0    | 228.5   | 147.6    |
| 20303d24      | 120.8                             | T-W  |                            |    | 831.6  | 53.10 | 1.29                                       | 0.0570 | 0.0031      | 0.0030 | 0.1575 | 0.0070                               | 0.0066 | 0.0188 | 0.0005     | 0.0004 | 0.45                     |       |             | 500.0    | 118.5   | 148.5    |
| 20303d21      | 120.8                             | T-W  |                            |    | 638.1  | 51.79 | 1.22                                       | 0.0595 | 0.0030      | 0.0029 | 0.1587 | 0.0084                               | 0.0080 | 0.0193 | 0.0005     | 0.0003 | 0.35                     |       |             | 587.1    | 112.0   | 149.6    |
| 20303d9       | 120.8                             | T-W  |                            |    | 1237.7 | 55.03 | 2.60                                       | 0.0531 | 0.0051      | 0.0050 | 0.1376 | 0.0113                               | 0.0111 | 0.0182 | 0.0009     | 0.0008 | 0.55                     |       |             | 331.5    | 214.8   | 130.9    |
| 20303d20      | 120.8                             | T-W  |                            |    | 1168.0 | 52.46 | 1.19                                       | 0.0537 | 0.0028      | 0.0027 | 0.1404 | 0.0063                               | 0.0059 | 0.0191 | 0.0004     | 0.0003 | 0.40                     |       |             | 366.7    | 117.6   | 133.4    |
| 20303d19      | 120.8                             | T-W  |                            |    | 1078.8 | 50.84 | 1.15                                       | 0.0535 | 0.0023      | 0.0021 | 0.1447 | 0.0060                               | 0.0056 | 0.0197 | 0.0004     | 0.0003 | 0.44                     |       |             | 350.1    | 88.9    | 137.3    |
| 20303d7       | 120.8                             | T-W  |                            |    | 1100.7 | 54.67 | 3.37                                       | 0.0527 | 0.0064      | 0.0063 | 0.1322 | 0.0147                               | 0.0145 | 0.0183 | 0.0011     | 0.0011 | 0.54                     |       |             | 322.3    | 274.0   | 126.1    |
| 20303d18      | 120.8                             | T-W  |                            |    | 1119.6 | 52.42 | 1.24                                       | 0.0512 | 0.0022      | 0.0021 | 0.1365 | 0.0052                               | 0.0048 | 0.0191 | 0.0005     | 0.0003 | 0.52                     |       |             | 255.6    | 96.3    | 129.9    |
| 20303d22      | 120.8                             | T-W  |                            |    | 1179.6 | 52.22 | 1.19                                       | 0.0514 | 0.0021      | 0.0020 | 0.1353 | 0.0054                               | 0.0050 | 0.0191 | 0.0004     | 0.0003 | 0.46                     |       |             | 257.5    | 90.7    | 128.9    |
| 20303d10      | 120.8                             | T-W  |                            |    | 1153.1 | 53.53 | 2.20                                       | 0.0508 | 0.0040      | 0.0039 | 0.1293 | 0.0095                               | 0.0093 | 0.0187 | 0.0008     | 0.0007 | 0.53                     |       |             | 231.6    | 212.0   | 123.5    |
| 20303d12      | 120.8                             | T-W  |                            |    | 1073.6 | 52.39 | 1.56                                       | 0.0501 | 0.0028      | 0.0027 | 0.1314 | 0.0070                               | 0.0067 | 0.0191 | 0.0006     | 0.0005 | 0.50                     |       |             | 211.2    | 124.1   | 125.3    |
| 20303d5       | 120.8                             | T-W  |                            |    | 1094.3 | 55.34 | 4.27                                       | 0.0488 | 0.0072      | 0.0072 | 0.1208 | 0.0167                               | 0.0166 | 0.0181 | 0.0014     | 0.0014 | 0.55                     |       |             | 139.0    | 311.1   | 115.8    |
| 20303d6       | 120.8                             | T-W  |                            |    | 1056.5 | 55.37 | 3.85                                       | 0.0484 | 0.0064      | 0.0064 | 0.1203 | 0.0149                               | 0.0148 | 0.0181 | 0.0013     | 0.0012 | 0.55                     |       |             | 120.5    | 285.1   | 115.3    |
| 44UM10J5HZ    |                                   |      |                            |    |        |       |                                            |        |             |        |        |                                      |        |        |            |        |                          |       |             |          |         |          |
| 20304A5       | 118.3                             | T-W  |                            |    | 1043.1 | 51.84 | 1.07                                       | 0.0839 | 0.0043      | 0.0041 | 0.2193 | 0.0109                               | 0.0104 | 0.0193 | 0.0004     | 0.0003 | 0.29                     |       |             | 1327.8   | 93.1    | 201.3    |
| 20304A6       | 118.3                             | T-W  |                            |    | 994.7  | 52.06 | 1.07                                       | 0.0697 | 0.0034      | 0.0032 | 0.1805 | 0.0082                               | 0.0077 | 0.0192 | 0.0004     | 0.0003 | 0.32                     |       |             | 953.7    | 92.1    | 168.5    |
| 20304A7       | 118.3                             | T-W  |                            |    | 1144.7 | 53.02 | 1.06                                       | 0.0721 | 0.0025      | 0.0023 | 0.1845 | 0.0060                               | 0.0053 | 0.0189 | 0.0004     | 0.0002 | 0.45                     |       |             | 1020.4   | 57.3    | 171.9    |

| Analysis date | Final U-Pb ages (Ma) <sup>a</sup> |     | Concentration <sup>b</sup> |    |        | Th/U  | Data for Tera-Wasserburg plot <sup>c</sup> |              |             |              |            | Data for Wetherill plot <sup>c</sup> |              |            |            |              | 208Pb/232Th <sup>c</sup> |     | 207Pb/206Pb              |            | 207Pb/2     |            |          |
|---------------|-----------------------------------|-----|----------------------------|----|--------|-------|--------------------------------------------|--------------|-------------|--------------|------------|--------------------------------------|--------------|------------|------------|--------------|--------------------------|-----|--------------------------|------------|-------------|------------|----------|
|               |                                   |     | Pb                         | Th | U      |       | 238U/206Pb                                 |              | 207Pb/206Pb |              |            | 207Pb/235U                           |              |            | 206Pb/238U |              |                          | rho | 208Pb/232Th <sup>c</sup> |            | 207Pb/206Pb |            | Age (Ma) |
|               |                                   |     | ppm                        |    |        |       | Ratio                                      | 2 $\sigma^*$ | Ratio       | 2 $\sigma^*$ | 2 $\sigma$ | Ratio                                | 2 $\sigma^*$ | 2 $\sigma$ | Ratio      | 2 $\sigma^*$ | 2 $\sigma$               |     | Ratio                    | 2 $\sigma$ | Age (Ma)    | 2 $\sigma$ | Age (Ma) |
| 20304A8       | 118.3                             | T-W |                            |    | 606.2  | 50.14 | 1.20                                       | 0.1182       | 0.0080      | 0.0078       | 0.3229     | 0.0209                               | 0.0203       | 0.0199     | 0.0005     | 0.0004       | 0.29                     |     |                          | 1953.7     | 117.1       | 284.1      |          |
| 20304A9       | 118.3                             | T-W |                            |    | 895.6  | 51.29 | 1.11                                       | 0.0911       | 0.0058      | 0.0056       | 0.2420     | 0.0147                               | 0.0143       | 0.0195     | 0.0004     | 0.0003       | 0.26                     |     |                          | 1472.2     | 116.7       | 220.1      |          |
| 20304A10      | 118.3                             | T-W |                            |    | 653.1  | 50.20 | 1.21                                       | 0.1079       | 0.0079      | 0.0077       | 0.2989     | 0.0250                               | 0.0246       | 0.0199     | 0.0005     | 0.0004       | 0.23                     |     |                          | 1783.3     | 129.3       | 265.5      |          |
| 20304A11      | 118.3                             | T-W |                            |    | 744.3  | 51.79 | 1.10                                       | 0.0715       | 0.0042      | 0.0041       | 0.1875     | 0.0108                               | 0.0104       | 0.0193     | 0.0004     | 0.0003       | 0.26                     |     |                          | 988.6      | 112.0       | 174.5      |          |
| 20304A12      | 118.3                             | T-W |                            |    | 793.9  | 47.47 | 1.14                                       | 0.1165       | 0.0072      | 0.0070       | 0.3347     | 0.0162                               | 0.0154       | 0.0211     | 0.0005     | 0.0004       | 0.40                     |     |                          | 1916.7     | 107.4       | 293.2      |          |
| 20304A18      | 118.3                             | T-W |                            |    | 704.2  | 52.86 | 1.25                                       | 0.0817       | 0.0033      | 0.0031       | 0.2122     | 0.0080                               | 0.0073       | 0.0189     | 0.0004     | 0.0003       | 0.53                     |     |                          | 1238.9     | 74.5        | 195.4      |          |
| 20304A19      | 118.3                             | T-W |                            |    | 1150.6 | 52.62 | 1.20                                       | 0.0677       | 0.0043      | 0.0042       | 0.1752     | 0.0075                               | 0.0070       | 0.0190     | 0.0004     | 0.0003       | 0.42                     |     |                          | 857.4      | 132.4       | 163.9      |          |
| 20304A20      | 118.3                             | T-W |                            |    | 622.1  | 51.97 | 1.20                                       | 0.0860       | 0.0052      | 0.0050       | 0.2281     | 0.0124                               | 0.0119       | 0.0192     | 0.0004     | 0.0003       | 0.33                     |     |                          | 1400.0     | 111.1       | 208.6      |          |
| 20304A21      | 118.3                             | T-W |                            |    | 666.9  | 46.93 | 1.13                                       | 0.1478       | 0.0076      | 0.0073       | 0.4328     | 0.0192                               | 0.0180       | 0.0213     | 0.0005     | 0.0004       | 0.45                     |     |                          | 2316.4     | 83.2        | 365.1      |          |
| 20304A22      | 118.3                             | T-W |                            |    | 722.9  | 46.31 | 1.11                                       | 0.1672       | 0.0078      | 0.0074       | 0.4959     | 0.0204                               | 0.0190       | 0.0216     | 0.0005     | 0.0004       | 0.48                     |     |                          | 2525.0     | 73.9        | 408.9      |          |
| 20304A23      | 118.3                             | T-W |                            |    | 674.7  | 47.39 | 1.58                                       | 0.1207       | 0.0091      | 0.0089       | 0.3675     | 0.0306                               | 0.0300       | 0.0211     | 0.0007     | 0.0006       | 0.36                     |     |                          | 1961.4     | 130.7       | 317.8      |          |
| 20304A24      | 118.3                             | T-W |                            |    | 749.7  | 43.37 | 1.00                                       | 0.2116       | 0.0101      | 0.0096       | 0.6766     | 0.0270                               | 0.0250       | 0.0231     | 0.0005     | 0.0004       | 0.47                     |     |                          | 2922.2     | 72.2        | 524.7      |          |
| 20304A25      | 118.3                             | T-W |                            |    | 655.5  | 49.25 | 1.21                                       | 0.1129       | 0.0060      | 0.0058       | 0.3161     | 0.0166                               | 0.0159       | 0.0203     | 0.0005     | 0.0004       | 0.38                     |     |                          | 1839.2     | 90.7        | 278.9      |          |
| 20304A26      | 118.3                             | T-W |                            |    | 569.0  | 51.40 | 1.31                                       | 0.0710       | 0.0043      | 0.0042       | 0.1897     | 0.0107                               | 0.0103       | 0.0195     | 0.0005     | 0.0004       | 0.38                     |     |                          | 947.2      | 114.7       | 176.3      |          |

Note: a Mean: weighted average 206Pb/238U age; b concentration uncertainty < 5%; c data and dates not corrected for common-Pb and only 2 $\sigma^*$  were used; d Concordance calculated as ( $^{206}\text{Pb}-^{238}\text{U}$  age/ $^{207}\text{Pb}-^{238}\text{U}$  age)\*100; Decay constants of Jaffey et al. (1971) used and a small number data were deleted due to abnormal ages, i.e., quite young or older and different from other data in the sample group. 2 $\sigma^*$ : uncertainty has calculated as the recommendations in Horstwood et al. (2016)



| Dates <sup>c</sup> |            |     |             |          |     |    | % conc<br>d |
|--------------------|------------|-----|-------------|----------|-----|----|-------------|
| <sup>35</sup> U    | 206Pb/238U |     | 208Pb/232Th |          |     |    |             |
| 2σ                 | Age (Ma)   | 2σ* | 2σ          | Age (Ma) | 2σ* | 2σ |             |
| 4.7                | 120.6      | 2.6 | 1.9         |          |     |    | 78.9        |
| 3.8                | 119.1      | 2.9 | 2.3         |          |     |    | 94.4        |
| 8.5                | 119.4      | 2.4 | 1.6         |          |     |    | 69.4        |
| 2.9                | 117.5      | 2.3 | 1.4         |          |     |    | 92.0        |
| 7.3                | 120.1      | 2.7 | 2.0         |          |     |    | 70.4        |
| 9.1                | 124.1      | 2.7 | 1.9         |          |     |    | 51.8        |
| 4.3                | 118.4      | 2.6 | 1.9         |          |     |    | 92.4        |
| 4.6                | 118.9      | 2.6 | 1.8         |          |     |    | 80.5        |
| 4.4                | 115.1      | 2.5 | 1.7         |          |     |    | 80.2        |
| 4.2                | 118.0      | 3.2 | 2.6         |          |     |    | 87.1        |
| 3.9                | 116.2      | 3.0 | 2.4         |          |     |    | 87.8        |
| 4.0                | 116.9      | 3.3 | 2.8         |          |     |    | 96.5        |
| 6.4                | 117.5      | 3.1 | 2.5         |          |     |    | 70.9        |
| 4.6                | 117.6      | 2.7 | 2.0         |          |     |    | 67.0        |
| 4.7                | 116.8      | 2.8 | 2.1         |          |     |    | 87.7        |
| 3.6                | 118.1      | 3.3 | 2.7         |          |     |    | 99.9        |
| 3.9                | 116.2      | 2.6 | 1.9         |          |     |    | 97.7        |
| 3.4                | 115.0      | 2.7 | 2.0         |          |     |    | 97.9        |
| 2.8                | 116.8      | 2.4 | 1.7         |          |     |    | 98.4        |
| 3.2                | 117.3      | 2.5 | 1.7         |          |     |    | 99.4        |
| 10.5               | 127.3      | 3.5 | 2.8         |          |     |    | 39.5        |
| 10.7               | 129.7      | 3.9 | 3.3         |          |     |    | 45.6        |
| 20.2               | 126.8      | 4.2 | 3.7         |          |     |    | 49.5        |
| 11.5               | 119.9      | 4.3 | 3.8         |          |     |    | 61.5        |
| 7.5                | 116.7      | 3.9 | 3.5         |          |     |    | 65.1        |
| 6.7                | 119.0      | 3.9 | 3.4         |          |     |    | 73.7        |
| 5.1                | 120.3      | 3.6 | 3.1         |          |     |    | 78.9        |

| Dates <sup>c</sup> |            |     |             |          |     |    | % conc<br>d |
|--------------------|------------|-----|-------------|----------|-----|----|-------------|
| <sup>35</sup> U    | 206Pb/238U |     | 208Pb/232Th |          |     |    |             |
| 2σ                 | Age (Ma)   | 2σ* | 2σ          | Age (Ma) | 2σ* | 2σ |             |
| 12.3               | 122.5      | 4.4 | 4.0         |          |     |    | 78.6        |
| 5.0                | 119.7      | 3.9 | 3.4         |          |     |    | 79.9        |
| 4.7                | 120.7      | 3.6 | 3.0         |          |     |    | 82.6        |
| 4.7                | 124.9      | 4.0 | 3.5         |          |     |    | 82.7        |
| 7.3                | 119.0      | 4.5 | 4.1         |          |     |    | 83.9        |
| 3.8                | 121.1      | 4.0 | 3.5         |          |     |    | 87.9        |
| 5.4                | 122.0      | 4.4 | 3.9         |          |     |    | 91.2        |
| 3.9                | 121.6      | 4.0 | 3.5         |          |     |    | 91.8        |
| 5.2                | 122.9      | 4.5 | 4.0         |          |     |    | 93.4        |
| 4.9                | 117.2      | 4.6 | 4.2         |          |     |    | 95.9        |
| 4.4                | 120.3      | 4.6 | 4.1         |          |     |    | 96.7        |
| 4.3                | 117.2      | 3.7 | 3.3         |          |     |    | 98.4        |
| 3.8                | 118.6      | 3.9 | 3.5         |          |     |    | 99.0        |
| 4.7                | 122.6      | 4.4 | 3.9         |          |     |    | 99.9        |
| 14.4               | 133.9      | 3.2 | 2.5         |          |     |    | 35.9        |
| 16.6               | 131.0      | 3.1 | 2.4         |          |     |    | 36.0        |
| 10.5               | 123.8      | 2.7 | 1.9         |          |     |    | 56.5        |
| 4.7                | 122.7      | 3.0 | 2.4         |          |     |    | 88.7        |
| 8.4                | 121.7      | 4.0 | 3.5         |          |     |    | 70.8        |
| 4.5                | 121.6      | 3.6 | 3.1         |          |     |    | 97.3        |
| 11.8               | 121.2      | 3.2 | 2.6         |          |     |    | 65.4        |
| 4.4                | 120.5      | 3.3 | 2.7         |          |     |    | 84.1        |
| 6.7                | 120.5      | 3.1 | 2.5         |          |     |    | 63.7        |
| 3.9                | 120.4      | 2.7 | 1.9         |          |     |    | 84.1        |
| 4.7                | 120.3      | 3.2 | 2.6         |          |     |    | 88.1        |
| 5.7                | 119.6      | 3.1 | 2.5         |          |     |    | 70.4        |
| 3.3                | 119.2      | 2.9 | 2.2         |          |     |    | 93.3        |
| 4.0                | 119.2      | 2.4 | 1.5         |          |     |    | 66.0        |

| Dates <sup>c</sup> |            |     |     |             |     |     |  | % conc<br>d |
|--------------------|------------|-----|-----|-------------|-----|-----|--|-------------|
| 35U                | 206Pb/238U |     |     | 208Pb/232Th |     |     |  |             |
| 2σ                 | Age (Ma)   | 2σ* | 2σ  | Age (Ma)    | 2σ* | 2σ  |  |             |
| 5.1                | 118.9      | 4.3 | 3.8 |             |     |     |  | 87.9        |
| 3.0                | 118.0      | 2.6 | 1.8 |             |     |     |  | 82.3        |
| 2.7                | 117.1      | 2.5 | 1.8 |             |     |     |  | 91.1        |
| 3.2                | 116.4      | 3.1 | 2.5 |             |     |     |  | 96.5        |
| 29.6               | 127.6      | 4.4 | 4.0 |             |     |     |  | 36.1        |
| 10.8               | 121.1      | 4.3 | 3.8 |             |     |     |  | 54.8        |
| 8.8                | 120.8      | 3.6 | 3.0 |             |     |     |  | 54.1        |
| 9.1                | 120.7      | 3.9 | 3.4 |             |     |     |  | 66.2        |
| 5.2                | 117.5      | 3.6 | 3.0 |             |     |     |  | 71.3        |
| 4.4                | 117.3      | 3.8 | 3.3 |             |     |     |  | 76.9        |
| 6.4                | 116.3      | 3.7 | 3.2 |             |     |     |  | 84.1        |
| 5.2                | 115.5      | 3.6 | 3.1 |             |     |     |  | 81.3        |
| 5.1                | 115.5      | 3.2 | 2.7 |             |     |     |  | 82.2        |
| 4.7                | 114.2      | 3.4 | 2.9 |             |     |     |  | 76.4        |
| 4.1                | 116.8      | 3.5 | 3.0 | 119.5       | 3.5 | 2.9 |  | 100.3       |
| 4.2                | 115.4      | 3.6 | 3.2 | 120.2       | 3.3 | 2.8 |  | 99.5        |
| 4.3                | 118.9      | 3.5 | 2.9 |             |     |     |  | 100.1       |
| 3.5                | 118.6      | 3.2 | 2.7 |             |     |     |  | 100.4       |
| 3.7                | 119.0      | 3.3 | 2.7 |             |     |     |  | 99.2        |
| 3.8                | 121.7      | 3.6 | 3.1 | 121.0       | 3.2 | 2.6 |  | 99.9        |
| 3.8                | 117.6      | 3.6 | 3.0 |             |     |     |  | 98.8        |
| 3.9                | 120.1      | 3.6 | 3.1 |             |     |     |  | 98.2        |
| 4.3                | 120.2      | 4.0 | 3.5 | 120.4       | 3.3 | 2.7 |  | 100.3       |
| 4.1                | 118.1      | 3.1 | 2.4 | 115.6       | 3.4 | 3.0 |  | 98.9        |

| Dates <sup>c</sup> |            |     |     |             |     |     | % conc<br>d |
|--------------------|------------|-----|-----|-------------|-----|-----|-------------|
| 35U                | 206Pb/238U |     |     | 208Pb/232Th |     |     |             |
| 2σ                 | Age (Ma)   | 2σ* | 2σ  | Age (Ma)    | 2σ* | 2σ  |             |
| 3.4                | 117.9      | 3.2 | 2.6 | 123.1       | 3.2 | 2.5 | 99.1        |
| 4.2                | 120.8      | 3.1 | 2.5 | 118.3       | 3.2 | 2.6 | 88.2        |
| 6.2                | 118.5      | 3.2 | 2.7 | 121.0       | 3.7 | 3.2 | 94.3        |
| 3.7                | 117.7      | 2.9 | 2.3 | 120.0       | 3.2 | 2.6 | 96.3        |
| 3.2                | 116.0      | 3.1 | 2.5 | 122.8       | 3.4 | 2.9 | 99.3        |
| 3.1                | 117.6      | 3.2 | 2.6 | 120.6       | 3.0 | 2.4 | 100.4       |
| 3.8                | 120.1      | 3.1 | 2.4 | 122.0       | 3.0 | 2.3 | 99.6        |
| 3.7                | 120.2      | 2.9 | 2.3 | 122.8       | 2.9 | 2.3 | 99.1        |
| 10.7               | 120.4      | 9.2 | 8.9 | 118.1       | 8.1 | 7.9 | 87.9        |
| 5.9                | 120.6      | 3.3 | 2.7 | 119.7       | 3.4 | 2.8 | 82.6        |
| 5.7                | 120.1      | 3.9 | 3.4 | 123.5       | 3.4 | 2.8 | 86.9        |
| 22.8               | 126.9      | 4.9 | 4.4 |             |     |     | 54.3        |
| 5.4                | 118.2      | 4.3 | 3.9 | 124.1       | 3.2 | 2.6 | 93.0        |
| 5.0                | 120.6      | 4.4 | 3.9 | 123.4       | 3.1 | 2.4 | 93.2        |
| 3.0                | 116.9      | 2.6 | 1.9 |             |     |     | 97.7        |
| 3.8                | 119.7      | 3.3 | 2.7 | 122.4       | 3.4 | 2.8 | 96.4        |
| 2.9                | 120.3      | 2.6 | 1.8 | 122.5       | 3.4 | 2.8 | 99.1        |
| 3.9                | 117.8      | 3.3 | 2.7 | 120.7       | 3.3 | 2.7 | 100.7       |
| 3.4                | 117.2      | 3.2 | 2.6 | 121.8       | 3.2 | 2.6 | 99.0        |
| 3.6                | 117.0      | 3.4 | 2.8 | 123.9       | 3.1 | 2.4 | 98.5        |
| 3.6                | 121.4      | 3.4 | 2.8 | 119.2       | 3.3 | 2.7 | 96.2        |
| 4.2                | 120.8      | 3.9 | 3.4 | 119.2       | 3.3 | 2.8 | 98.6        |
| 9.0                | 118.4      | 5.9 | 5.5 | 120.6       | 5.3 | 5.0 | 95.0        |
| 3.4                | 117.1      | 3.2 | 2.6 | 118.6       | 3.3 | 2.7 | 94.8        |
| 4.5                | 119.7      | 4.3 | 3.8 | 116.1       | 3.6 | 3.2 | 95.8        |
| 4.2                | 117.0      | 4.2 | 3.8 | 121.6       | 3.2 | 2.7 | 99.2        |
| 4.3                | 121.1      | 4.1 | 3.6 | 121.0       | 3.5 | 3.0 | 100.7       |
| 5.1                | 119.8      | 4.0 | 3.5 | 122.4       | 3.2 | 2.6 | 96.2        |

| Dates <sup>c</sup> |            |     |     |             |     |     |       | % conc<br>d |
|--------------------|------------|-----|-----|-------------|-----|-----|-------|-------------|
| 35U                | 206Pb/238U |     |     | 208Pb/232Th |     |     |       |             |
| 2σ                 | Age (Ma)   | 2σ* | 2σ  | Age (Ma)    | 2σ* | 2σ  |       |             |
| 3.7                | 118.3      | 3.8 | 3.3 | 122.9       | 3.3 | 2.7 | 98.2  |             |
| 10.0               | 116.4      | 5.0 | 4.6 | 121.3       | 3.2 | 2.6 | 95.9  |             |
| 30.5               | 140.0      | 4.7 | 4.1 |             |     |     | 40.8  |             |
| 7.2                | 121.1      | 2.8 | 2.1 | 120.1       | 3.0 | 2.4 | 89.6  |             |
| 8.9                | 123.2      | 3.1 | 2.4 | 119.7       | 5.8 | 5.5 | 77.2  |             |
| 8.7                | 120.6      | 3.6 | 3.1 |             |     |     | 89.5  |             |
| 8.0                | 119.8      | 3.0 | 2.3 |             |     |     | 85.8  |             |
| 7.2                | 122.0      | 2.9 | 2.2 |             |     |     | 82.1  |             |
| 6.5                | 120.8      | 3.0 | 2.3 | 119.8       | 3.5 | 3.0 | 101.3 |             |
| 6.2                | 119.3      | 2.8 | 2.0 | 121.0       | 3.0 | 2.3 | 94.6  |             |
| 8.5                | 122.4      | 3.6 | 3.0 |             |     |     | 100.1 |             |
| 6.7                | 119.0      | 2.8 | 2.1 |             |     |     | 99.6  |             |
| 5.8                | 119.1      | 2.7 | 1.9 |             |     |     | 97.4  |             |
| 5.8                | 119.8      | 2.6 | 1.8 |             |     |     | 97.4  |             |
| 5.7                | 118.9      | 2.7 | 2.0 |             |     |     | 95.8  |             |
| 7.1                | 118.8      | 3.1 | 2.4 |             |     |     | 98.2  |             |
| 8.2                | 118.9      | 3.4 | 2.9 |             |     |     | 97.4  |             |
| 6.9                | 119.9      | 3.0 | 2.4 |             |     |     | 99.8  |             |
| 15.6               | 130.0      | 4.2 | 3.7 |             |     |     | 50.0  |             |
| 8.4                | 124.1      | 3.7 | 3.1 |             |     |     | 62.9  |             |
| 4.7                | 122.3      | 4.2 | 3.7 |             |     |     | 90.6  |             |
| 14.1               | 122.1      | 3.1 | 2.5 |             |     |     | 45.6  |             |
| 5.3                | 121.4      | 3.3 | 2.7 |             |     |     | 81.4  |             |
| 3.5                | 121.2      | 3.8 | 3.3 |             |     |     | 93.0  |             |
| 5.9                | 120.5      | 3.8 | 3.3 |             |     |     | 74.0  |             |
| 4.6                | 120.5      | 4.1 | 3.7 |             |     |     | 92.4  |             |
| 5.9                | 119.9      | 3.4 | 2.8 |             |     |     | 73.7  |             |

| Dates <sup>c</sup> |            |     |     |             |     |     |       | % conc<br>d |
|--------------------|------------|-----|-----|-------------|-----|-----|-------|-------------|
| 35U                | 206Pb/238U |     |     | 208Pb/232Th |     |     |       |             |
| 2σ                 | Age (Ma)   | 2σ* | 2σ  | Age (Ma)    | 2σ* | 2σ  |       |             |
| 10.5               | 119.2      | 4.0 | 3.5 |             |     |     | 58.9  |             |
| 4.4                | 119.0      | 3.6 | 3.1 |             |     |     | 87.9  |             |
| 6.3                | 118.3      | 3.7 | 3.2 |             |     |     | 70.9  |             |
| 2.5                | 118.1      | 2.9 | 2.3 |             |     |     | 98.9  |             |
| 2.6                | 117.9      | 2.9 | 2.3 |             |     |     | 98.0  |             |
| 3.3                | 117.1      | 3.0 | 2.4 |             |     |     | 88.3  |             |
| 3.0                | 116.1      | 2.6 | 1.9 |             |     |     | 86.5  |             |
| 3.6                | 115.3      | 3.6 | 3.1 |             |     |     | 94.0  |             |
| 6.8                | 125.5      | 4.3 | 3.8 |             |     |     | 67.7  |             |
| 12.7               | 122.3      | 4.7 | 4.3 |             |     |     | 61.4  |             |
| 5.8                | 122.2      | 4.0 | 3.5 |             |     |     | 106.9 |             |
| 8.0                | 122.0      | 4.2 | 3.7 |             |     |     | 69.1  |             |
| 6.3                | 119.9      | 4.2 | 3.8 |             |     |     | 74.4  |             |
| 4.5                | 119.7      | 4.2 | 3.8 |             |     |     | 92.4  |             |
| 4.6                | 119.6      | 4.2 | 3.7 |             |     |     | 94.6  |             |
| 4.8                | 119.2      | 4.3 | 3.8 |             |     |     | 94.3  |             |
| 5.0                | 119.2      | 4.0 | 3.6 |             |     |     | 83.1  |             |
| 3.6                | 118.9      | 3.6 | 3.1 |             |     |     | 97.1  |             |
| 3.9                | 117.6      | 3.8 | 3.3 |             |     |     | 82.2  |             |
| 3.5                | 117.4      | 3.6 | 3.1 |             |     |     | 98.4  |             |
| 4.6                | 115.7      | 3.6 | 3.2 |             |     |     | 80.5  |             |
| 3.9                | 115.1      | 4.1 | 3.7 |             |     |     | 99.0  |             |
| 5.4                | 119.5      | 2.7 | 2.0 | 113.9       | 2.6 | 1.9 | 105.4 |             |
| 4.8                | 118.7      | 2.5 | 1.8 | 117.3       | 3.0 | 2.4 | 101.5 |             |
| 6.6                | 120.7      | 2.9 | 2.2 | 115.0       | 2.2 | 1.4 | 91.4  |             |
| 7.2                | 119.9      | 3.0 | 2.3 | 114.9       | 2.2 | 1.3 | 91.0  |             |
| 11.1               | 124.7      | 2.8 | 2.0 | 118.6       | 2.8 | 2.1 | 62.3  |             |

| Dates <sup>c</sup> |            |     |             |          |     |     | % conc<br>d |
|--------------------|------------|-----|-------------|----------|-----|-----|-------------|
| 35U                | 206Pb/238U |     | 208Pb/232Th |          |     |     |             |
| 2σ                 | Age (Ma)   | 2σ* | 2σ          | Age (Ma) | 2σ* | 2σ  |             |
| 5.8                | 121.2      | 2.7 | 1.9         | 113.1    | 2.5 | 1.8 | 85.5        |
| 12.9               | 123.7      | 4.1 | 3.6         | 116.9    | 2.9 | 2.3 | 64.9        |

|     |       |     |     |  |  |  |      |
|-----|-------|-----|-----|--|--|--|------|
| 3.6 | 123.5 | 3.9 | 3.3 |  |  |  | 94.2 |
| 6.6 | 123.5 | 4.0 | 3.5 |  |  |  | 74.8 |
| 4.4 | 122.9 | 3.5 | 2.9 |  |  |  | 94.3 |
| 4.2 | 122.8 | 3.7 | 3.2 |  |  |  | 86.6 |
| 3.2 | 121.5 | 3.3 | 2.7 |  |  |  | 96.1 |
| 3.7 | 121.0 | 3.7 | 3.2 |  |  |  | 86.1 |
| 3.5 | 120.7 | 3.5 | 3.0 |  |  |  | 93.0 |
| 5.3 | 119.7 | 5.5 | 5.1 |  |  |  | 91.6 |
| 6.6 | 119.4 | 5.7 | 5.3 |  |  |  | 88.4 |
| 4.3 | 118.7 | 4.7 | 4.3 |  |  |  | 94.9 |
| 3.7 | 117.3 | 4.0 | 3.6 |  |  |  | 97.0 |
| 4.8 | 116.8 | 3.7 | 3.2 |  |  |  | 90.5 |
| 7.2 | 116.7 | 5.3 | 4.9 |  |  |  | 80.1 |
| 4.9 | 116.3 | 4.3 | 3.9 |  |  |  | 89.2 |
| 4.4 | 114.8 | 4.1 | 3.7 |  |  |  | 88.1 |
| 4.5 | 113.7 | 4.8 | 4.4 |  |  |  | 97.8 |

|      |       |     |     |  |  |  |      |
|------|-------|-----|-----|--|--|--|------|
| 2.3  | 122.5 | 2.7 | 2.0 |  |  |  | 94.4 |
| 4.3  | 122.2 | 2.6 | 1.8 |  |  |  | 82.6 |
| 3.4  | 122.0 | 3.1 | 2.5 |  |  |  | 90.5 |
| 4.1  | 122.0 | 3.1 | 2.5 |  |  |  | 77.4 |
| 5.6  | 121.5 | 3.0 | 2.4 |  |  |  | 74.9 |
| 5.0  | 121.1 | 3.0 | 2.4 |  |  |  | 85.1 |
| 11.3 | 121.1 | 3.9 | 3.4 |  |  |  | 78.9 |
| 2.8  | 120.9 | 3.2 | 2.5 |  |  |  | 92.9 |
| 3.3  | 119.9 | 3.3 | 2.8 |  |  |  | 96.9 |

| Dates <sup>c</sup> |            |     |     |             |     |    | % conc<br>d |
|--------------------|------------|-----|-----|-------------|-----|----|-------------|
| 35U                | 206Pb/238U |     |     | 208Pb/232Th |     |    |             |
| 2σ                 | Age (Ma)   | 2σ* | 2σ  | Age (Ma)    | 2σ* | 2σ |             |
| 2.0                | 119.1      | 2.7 | 2.0 |             |     |    | 98.9        |
| 2.6                | 118.5      | 2.9 | 2.3 |             |     |    | 95.3        |
| 3.0                | 118.4      | 2.9 | 2.3 |             |     |    | 91.2        |
| 2.2                | 117.4      | 2.7 | 2.0 |             |     |    | 92.9        |
| 22.0               | 154.7      | 4.6 | 3.9 |             |     |    | 23.8        |
| 10.0               | 143.9      | 3.3 | 2.5 |             |     |    | 28.8        |
| 38.2               | 143.0      | 4.9 | 4.3 |             |     |    | 35.5        |
| 9.0                | 133.6      | 3.4 | 2.6 |             |     |    | 40.9        |
| 14.1               | 132.0      | 3.4 | 2.7 |             |     |    | 43.9        |
| 28.3               | 131.4      | 3.8 | 3.2 |             |     |    | 37.0        |
| 20.5               | 128.8      | 4.1 | 3.5 |             |     |    | 49.8        |
| 15.2               | 127.9      | 2.9 | 2.1 |             |     |    | 45.6        |
| 7.0                | 126.9      | 4.2 | 3.7 |             |     |    | 66.3        |
| 4.0                | 122.4      | 2.6 | 1.8 |             |     |    | 73.8        |
| 3.8                | 121.1      | 3.1 | 2.5 |             |     |    | 89.4        |
| 2.5                | 121.0      | 3.1 | 2.5 |             |     |    | 97.0        |
| 3.8                | 120.7      | 2.8 | 2.0 |             |     |    | 91.3        |
| 2.9                | 120.5      | 2.9 | 2.2 |             |     |    | 100.5       |
| 2.6                | 119.9      | 2.6 | 1.8 |             |     |    | 81.2        |
| 2.9                | 119.7      | 3.1 | 2.5 |             |     |    | 83.6        |
| 2.2                | 119.5      | 2.4 | 1.6 |             |     |    | 91.4        |
| 39.0               | 174.0      | 6.0 | 5.3 |             |     |    | 21.4        |
| 21.8               | 137.1      | 3.6 | 2.9 |             |     |    | 34.1        |
| 26.7               | 135.6      | 3.2 | 2.4 |             |     |    | 34.5        |
| 24.3               | 128.8      | 3.4 | 2.8 |             |     |    | 43.9        |
| 22.4               | 126.6      | 3.0 | 2.3 |             |     |    | 45.5        |
| 13.5               | 126.0      | 2.6 | 1.8 |             |     |    | 53.5        |



| Dates <sup>c</sup> |            |     |     |             |     |    |      | % conc<br>d |
|--------------------|------------|-----|-----|-------------|-----|----|------|-------------|
| 35U                | 206Pb/238U |     |     | 208Pb/232Th |     |    |      |             |
| 2σ                 | Age (Ma)   | 2σ* | 2σ  | Age (Ma)    | 2σ* | 2σ |      |             |
| 12.4               | 123.9      | 2.7 | 1.9 |             |     |    | 54.2 |             |
| 6.0                | 123.0      | 2.5 | 1.6 |             |     |    | 57.5 |             |
| 8.3                | 122.4      | 2.5 | 1.7 |             |     |    | 50.0 |             |
| 9.8                | 122.1      | 2.6 | 1.7 |             |     |    | 51.6 |             |
| 9.7                | 122.0      | 2.3 | 1.4 |             |     |    | 55.7 |             |
| 14.2               | 121.6      | 2.4 | 1.5 |             |     |    | 59.0 |             |
| 9.0                | 119.9      | 2.6 | 1.8 |             |     |    | 64.4 |             |
| 2.6                | 119.2      | 2.4 | 1.5 |             |     |    | 85.3 |             |
| 5.5                | 118.8      | 2.4 | 1.5 |             |     |    | 67.8 |             |
| 2.8                | 118.0      | 2.3 | 1.4 |             |     |    | 90.5 |             |
| 2.4                | 117.8      | 2.3 | 1.3 |             |     |    | 84.4 |             |
| 2.4                | 117.8      | 2.3 | 1.5 |             |     |    | 92.1 |             |

|      |       |     |     |       |      |      |       |
|------|-------|-----|-----|-------|------|------|-------|
| 14.7 | 120.5 | 4.5 | 4.1 | 118.9 | 7.6  | 7.4  | 86.8  |
| 15.8 | 120.7 | 4.8 | 4.4 | 115.3 | 8.9  | 8.7  | 82.4  |
| 15.8 | 120.6 | 5.2 | 4.8 | 117.8 | 13.5 | 13.4 | 91.6  |
| 14.4 | 122.6 | 4.7 | 4.2 | 116.6 | 16.8 | 16.7 | 88.1  |
| 15.4 | 121.0 | 5.2 | 4.8 | 119.1 | 7.6  | 7.4  | 80.1  |
| 15.3 | 122.4 | 4.8 | 4.4 | 123.2 | 13.3 | 13.2 | 82.1  |
| 10.6 | 122.4 | 4.2 | 3.8 | 135.6 | 15.8 | 15.6 | 91.1  |
| 11.1 | 119.7 | 4.4 | 4.0 | 121.5 | 10.6 | 10.5 | 99.5  |
| 11.7 | 121.0 | 4.3 | 3.9 | 120.3 | 8.8  | 8.6  | 102.8 |
| 12.8 | 120.7 | 4.5 | 4.1 | 121.6 | 11.9 | 11.7 | 96.3  |
| 10.9 | 118.1 | 5.0 | 4.7 | 122.3 | 9.2  | 9.0  | 94.4  |
| 12.6 | 123.4 | 3.9 | 3.4 | 121.4 | 9.7  | 9.5  | 96.0  |
| 13.5 | 120.3 | 4.0 | 3.5 | 115.6 | 7.7  | 7.5  | 93.5  |
| 13.9 | 122.8 | 5.7 | 5.3 | 122.2 | 13.9 | 13.8 | 97.1  |
| 12.6 | 122.4 | 4.3 | 3.8 | 126.8 | 7.9  | 7.6  | 95.0  |

| Dates <sup>c</sup> |            |     |     |             |      |      | % conc<br>d |
|--------------------|------------|-----|-----|-------------|------|------|-------------|
| 35U                | 206Pb/238U |     |     | 208Pb/232Th |      |      |             |
| 2σ                 | Age (Ma)   | 2σ* | 2σ  | Age (Ma)    | 2σ*  | 2σ   |             |
| 11.1               | 123.1      | 4.3 | 3.8 |             |      |      | 91.8        |
| 11.0               | 123.3      | 3.9 | 3.4 | 118.5       | 6.4  | 6.2  | 85.5        |
| 12.4               | 124.1      | 4.2 | 3.7 | 122.6       | 4.7  | 4.4  | 85.6        |
| 13.8               | 117.7      | 4.2 | 3.8 | 116.6       | 6.9  | 6.7  | 73.7        |
| 12.9               | 120.9      | 4.3 | 3.9 | 116.5       | 6.1  | 5.8  | 91.0        |
| 11.1               | 117.1      | 3.9 | 3.4 | 117.5       | 6.3  | 6.0  | 92.9        |
| 9.8                | 122.3      | 4.0 | 3.5 | 121.0       | 9.1  | 8.9  | 95.2        |
| 11.5               | 121.7      | 3.9 | 3.4 | 115.6       | 7.4  | 7.2  | 92.7        |
| 10.3               | 122.5      | 4.5 | 4.0 | 118.5       | 6.3  | 6.0  | 102.1       |
| 10.0               | 122.9      | 3.6 | 3.1 | 118.8       | 7.8  | 7.6  | 92.8        |
| 8.5                | 119.1      | 3.3 | 2.8 | 126.4       | 7.2  | 6.9  | 97.3        |
| 10.3               | 122.2      | 4.1 | 3.6 | 123.0       | 8.4  | 8.2  | 96.8        |
| 10.5               | 123.4      | 3.9 | 3.4 | 121.2       | 6.7  | 6.5  | 98.5        |
| 8.6                | 123.1      | 3.9 | 3.4 | 116.0       | 7.0  | 6.8  | 104.7       |
| 13.1               | 124.3      | 4.1 | 3.6 | 118.2       | 6.0  | 5.7  | 94.8        |
| 9.8                | 121.5      | 3.6 | 3.1 | 116.5       | 5.4  | 5.1  | 97.7        |
| 9.4                | 120.8      | 4.1 | 3.6 | 121.9       | 7.2  | 6.9  | 94.6        |
| 10.3               | 122.7      | 3.9 | 3.4 | 124.6       | 7.2  | 7.0  | 102.9       |
| 13.6               | 119.4      | 4.0 | 3.6 | 116.1       | 6.7  | 6.5  | 91.2        |
| 14.6               | 118.7      | 5.2 | 4.8 | 117.5       | 4.6  | 4.3  | 90.3        |
| 22.0               | 126.7      | 6.4 | 6.1 | 120.8       | 5.3  | 5.0  | 48.5        |
| 11.9               | 121.8      | 4.1 | 3.7 | 123.1       | 14.2 | 14.1 | 97.4        |
| 11.8               | 118.9      | 4.3 | 3.8 | 117.2       | 7.9  | 7.7  | 96.4        |
| 14.5               | 120.5      | 6.5 | 6.2 | 117.0       | 5.3  | 5.0  | 97.9        |
| 10.2               | 119.5      | 4.0 | 3.5 | 119.1       | 6.8  | 6.5  | 97.3        |
| 12.0               | 116.2      | 4.5 | 4.1 | 116.8       | 7.5  | 7.3  | 97.7        |
| 12.3               | 121.7      | 4.6 | 4.1 | 118.5       | 6.4  | 6.2  | 96.0        |
| 11.5               | 118.9      | 4.2 | 3.7 | 117.4       | 10.4 | 10.3 | 93.5        |

| Dates <sup>c</sup> |            |     |     |             |      |      |       | % conc<br>d |
|--------------------|------------|-----|-----|-------------|------|------|-------|-------------|
| 35U                | 206Pb/238U |     |     | 208Pb/232Th |      |      |       |             |
| 2σ                 | Age (Ma)   | 2σ* | 2σ  | Age (Ma)    | 2σ*  | 2σ   |       |             |
| 13.7               | 124.2      | 4.8 | 4.4 | 121.4       | 7.0  | 6.8  | 101.3 |             |
| 8.3                | 121.8      | 3.8 | 3.2 | 115.0       | 14.3 | 14.1 | 102.5 |             |
| 10.1               | 126.8      | 4.6 | 4.1 | 120.1       | 10.2 | 10.1 | 99.3  |             |
| 10.0               | 122.1      | 4.3 | 3.8 | 119.2       | 6.2  | 5.9  | 97.3  |             |
| 10.8               | 120.3      | 4.2 | 3.8 | 120.6       | 7.6  | 7.4  | 94.7  |             |
| 10.8               | 118.9      | 4.6 | 4.2 | 119.6       | 7.7  | 7.5  | 94.4  |             |
| 32.8               | 133.4      | 5.4 | 4.9 |             |      |      | 51.7  |             |
| 32.5               | 126.5      | 5.0 | 4.6 |             |      |      | 44.7  |             |
| 53.1               | 117.6      | 8.8 | 8.5 | 118.8       | 11.7 | 11.6 | 73.5  |             |
| 8.1                | 120.9      | 3.8 | 3.3 | 117.5       | 5.2  | 4.9  | 90.4  |             |
| 7.0                | 122.1      | 4.0 | 3.5 | 120.0       | 9.3  | 9.1  | 95.8  |             |
| 7.3                | 120.1      | 3.5 | 2.9 | 120.5       | 7.6  | 7.4  | 98.7  |             |
| 6.4                | 119.2      | 3.6 | 3.1 | 123.3       | 6.3  | 6.0  | 99.6  |             |
| 6.5                | 120.8      | 3.4 | 2.8 | 119.4       | 4.8  | 4.4  | 98.3  |             |
| 6.0                | 118.7      | 3.1 | 2.5 | 116.0       | 5.0  | 4.6  | 99.7  |             |
| 7.1                | 118.1      | 3.5 | 3.0 | 117.6       | 4.1  | 3.6  | 96.4  |             |
| 6.2                | 118.1      | 3.5 | 3.0 | 116.0       | 4.8  | 4.4  | 99.4  |             |
| 6.6                | 120.6      | 3.7 | 3.2 | 116.6       | 5.4  | 5.1  | 105.8 |             |
| 7.5                | 118.6      | 3.5 | 2.9 | 117.8       | 4.9  | 4.5  | 96.5  |             |
| 7.8                | 120.8      | 4.1 | 3.6 | 117.3       | 4.8  | 4.5  | 101.8 |             |
| 6.7                | 120.7      | 3.3 | 2.7 | 121.9       | 4.5  | 4.1  | 100.2 |             |
| 9.5                | 119.2      | 3.7 | 3.2 | 120.6       | 5.3  | 4.9  | 87.8  |             |
| 11.0               | 120.2      | 3.6 | 3.0 |             |      |      | 76.3  |             |
| 8.1                | 117.7      | 3.4 | 2.9 | 120.9       | 4.1  | 3.7  | 90.4  |             |
| 8.7                | 120.0      | 4.0 | 3.6 | 115.0       | 4.4  | 4.0  | 89.5  |             |
| 8.4                | 120.6      | 3.4 | 2.9 | 120.4       | 4.6  | 4.2  | 88.5  |             |
| 9.3                | 120.4      | 3.8 | 3.3 | 116.2       | 4.4  | 4.1  | 94.2  |             |

| Dates <sup>c</sup> |            |     |     |             |     |     | % conc<br>d |
|--------------------|------------|-----|-----|-------------|-----|-----|-------------|
| 35U                | 206Pb/238U |     |     | 208Pb/232Th |     |     |             |
| 2σ                 | Age (Ma)   | 2σ* | 2σ  | Age (Ma)    | 2σ* | 2σ  |             |
| 8.5                | 119.1      | 3.6 | 3.1 | 119.7       | 4.4 | 4.1 | 95.5        |
| 7.0                | 120.1      | 3.2 | 2.6 | 116.9       | 7.9 | 7.7 | 94.0        |
| 7.8                | 120.2      | 3.9 | 3.4 | 118.3       | 4.5 | 4.1 | 94.4        |
| 8.5                | 120.6      | 3.8 | 3.3 | 116.5       | 4.3 | 3.9 | 98.4        |
| 6.7                | 118.6      | 3.7 | 3.3 | 117.3       | 4.6 | 4.3 | 93.9        |
| 11.1               | 118.9      | 4.2 | 3.8 | 119.4       | 4.0 | 3.5 | 98.6        |
| 10.7               | 118.8      | 4.1 | 3.7 | 120.7       | 4.8 | 4.4 | 92.7        |
| 7.9                | 116.6      | 3.7 | 3.2 | 115.2       | 5.8 | 5.6 | 93.7        |
| 7.9                | 120.0      | 4.0 | 3.5 | 115.8       | 4.4 | 4.0 | 93.7        |
| 11.5               | 117.6      | 3.6 | 3.0 |             |     |     | 68.8        |
| 9.7                | 117.8      | 3.3 | 2.8 |             |     |     | 74.2        |
| 4.5                | 121.3      | 3.0 | 2.3 |             |     |     | 91.3        |
| 24.0               | 123.1      | 5.3 | 4.9 | 115.8       | 5.8 | 5.6 | 80.2        |
| 6.8                |            |     | 3.2 | 116.5       | 3.1 | 2.6 | 0.0         |
| 4.5                | 120.7      | 3.1 | 2.5 | 119.8       | 4.7 | 4.3 | 103.0       |
| 4.6                | 117.5      | 3.0 | 2.4 | 119.7       | 5.0 | 4.7 | 97.6        |
| 5.3                | 120.4      | 3.5 | 3.0 | 123.8       | 4.5 | 4.0 | 101.3       |
| 4.7                | 121.7      | 3.3 | 2.7 | 123.7       | 3.9 | 3.4 | 96.0        |
| 4.0                | 118.9      | 2.7 | 2.0 | 116.1       | 6.0 | 5.8 | 99.8        |
| 4.7                | 118.6      | 3.2 | 2.6 | 119.9       | 5.2 | 4.8 | 97.1        |
| 3.9                | 116.6      | 2.8 | 2.1 | 115.1       | 4.5 | 4.1 | 100.2       |
| 4.4                | 120.6      | 3.4 | 2.8 | 119.7       | 5.0 | 4.7 | 99.2        |
| 5.8                | 116.2      | 3.2 | 2.6 | 115.6       | 3.4 | 2.9 | 96.4        |
| 4.8                | 120.5      | 3.3 | 2.7 | 115.3       | 3.7 | 3.2 | 95.3        |
| 2.6                | 114.1      | 2.8 | 2.2 |             |     |     | 98.9        |
| 3.5                | 114.6      | 3.3 | 2.8 |             |     |     | 100.0       |
| 3.7                | 115.1      | 3.2 | 2.6 |             |     |     | 98.8        |

| Dates <sup>c</sup> |            |     |     |             |     |     |       | % conc<br>d |
|--------------------|------------|-----|-----|-------------|-----|-----|-------|-------------|
| 35U                | 206Pb/238U |     |     | 208Pb/232Th |     |     |       |             |
| 2σ                 | Age (Ma)   | 2σ* | 2σ  | Age (Ma)    | 2σ* | 2σ  |       |             |
| 3.5                | 115.3      | 2.9 | 2.2 |             |     |     | 99.6  |             |
| 4.6                | 115.8      | 3.4 | 2.9 |             |     |     | 99.6  |             |
| 3.6                | 116.0      | 3.2 | 2.7 |             |     |     | 102.4 |             |
| 3.8                | 116.7      | 3.6 | 3.1 |             |     |     | 100.8 |             |
| 4.3                | 117.0      | 3.4 | 2.8 |             |     |     | 96.5  |             |
| 3.5                | 117.0      | 3.2 | 2.7 |             |     |     | 95.3  |             |
| 3.8                | 117.2      | 3.5 | 3.0 |             |     |     | 98.0  |             |
| 3.5                | 117.4      | 3.1 | 2.5 |             |     |     | 99.6  |             |
| 2.9                | 117.6      | 3.0 | 2.4 |             |     |     | 99.1  |             |
| 4.1                | 117.9      | 2.9 | 2.3 |             |     |     | 93.9  |             |
| 3.5                | 118.3      | 3.1 | 2.5 |             |     |     | 98.3  |             |
| 4.4                | 119.0      | 3.5 | 3.0 |             |     |     | 100.2 |             |
| 3.4                | 119.4      | 2.8 | 2.2 |             |     |     | 101.5 |             |
| 3.6                | 120.3      | 3.0 | 2.3 |             |     |     | 98.6  |             |
| 3.3                | 121.8      | 3.1 | 2.5 |             |     |     | 102.6 |             |
| 3.7                | 122.6      | 3.5 | 2.9 |             |     |     | 101.5 |             |
| 6.6                | 119.8      | 2.7 | 2.0 | 115.7       | 2.3 | 1.4 | 79.6  |             |
| 6.1                | 120.4      | 2.6 | 1.9 | 119.1       | 2.6 | 1.9 | 84.6  |             |
| 5.1                | 122.2      | 2.5 | 1.6 | 114.4       | 2.4 | 1.6 | 90.2  |             |
| 4.8                | 122.7      | 2.6 | 1.7 | 117.7       | 2.4 | 1.6 | 91.6  |             |
| 5.1                | 121.5      | 2.6 | 1.8 | 114.8       | 2.3 | 1.4 | 94.5  |             |
| 5.7                | 120.8      | 2.7 | 2.0 | 115.4       | 2.2 | 1.3 | 100.0 |             |
| 5.7                | 121.8      | 3.0 | 2.3 | 116.0       | 2.8 | 2.2 | 103.1 |             |
| 4.0                | 120.2      | 2.5 | 1.7 | 117.1       | 2.4 | 1.7 | 103.4 |             |
| 4.6                | 122.2      | 2.6 | 1.7 | 115.1       | 2.5 | 1.8 | 104.6 |             |
| 5.2                | 120.5      | 2.6 | 1.9 | 114.7       | 2.3 | 1.6 | 98.4  |             |
| 5.3                | 119.8      | 2.6 | 1.8 | 115.8       | 2.5 | 1.7 | 100.7 |             |
| 5.4                | 122.0      | 2.7 | 1.9 | 116.0       | 2.5 | 1.7 | 96.5  |             |

| Dates <sup>c</sup> |            |     |     |             |     |     | % conc<br>d |
|--------------------|------------|-----|-----|-------------|-----|-----|-------------|
| 35U                | 206Pb/238U |     |     | 208Pb/232Th |     |     |             |
| 2σ                 | Age (Ma)   | 2σ* | 2σ  | Age (Ma)    | 2σ* | 2σ  |             |
| 5.8                | 122.1      | 2.7 | 2.0 | 118.7       | 2.7 | 2.1 | 98.8        |
| 5.5                | 121.4      | 2.8 | 2.1 | 118.5       | 3.1 | 2.6 | 103.6       |
| 5.3                | 122.6      | 2.5 | 1.7 | 119.5       | 2.5 | 1.7 | 95.8        |
| 3.6                | 122.3      | 4.2 | 3.7 |             |     |     | 97.9        |
| 3.7                | 119.8      | 3.6 | 3.1 |             |     |     | 94.8        |
| 3.9                | 121.5      | 3.8 | 3.3 |             |     |     | 96.9        |
| 7.1                | 121.3      | 3.8 | 3.3 |             |     |     | 87.1        |
| 4.9                | 117.0      | 3.6 | 3.1 |             |     |     | 102.4       |
| 2.4                | 119.4      | 2.7 | 2.0 |             |     |     | 103.0       |
| 3.2                | 117.9      | 3.7 | 3.2 |             |     |     | 101.1       |
| 2.4                | 118.9      | 3.1 | 2.4 |             |     |     | 99.0        |
| 3.2                | 116.9      | 3.6 | 3.1 |             |     |     | 100.7       |
| 3.7                | 122.3      | 3.7 | 3.2 |             |     |     | 100.6       |
| 4.0                | 120.5      | 2.8 | 2.0 |             |     |     | 99.8        |
| 3.1                | 117.7      | 3.4 | 2.9 |             |     |     | 99.3        |
| 2.4                | 117.4      | 3.0 | 2.3 |             |     |     | 99.0        |
| 2.4                | 118.2      | 2.7 | 2.0 |             |     |     | 99.2        |
| 6.3                | 118.7      | 3.1 | 2.6 |             |     |     | 99.4        |
| 2.1                | 119.9      | 2.7 | 1.9 |             |     |     | 100.2       |
| 2.8                | 118.0      | 3.1 | 2.5 |             |     |     | 100.3       |
| 4.4                | 118.2      | 2.4 | 1.5 | 120.7       | 2.3 | 1.4 | 97.4        |
| 4.1                | 117.4      | 2.3 | 1.4 | 117.7       | 2.2 | 1.3 | 98.0        |
| 3.3                | 116.7      | 2.2 | 1.3 | 119.2       | 2.2 | 1.2 | 94.3        |
| 4.8                | 119.5      | 2.5 | 1.7 | 119.5       | 2.8 | 2.2 | 95.9        |
| 4.4                | 119.9      | 2.5 | 1.7 | 119.2       | 2.6 | 1.9 | 97.6        |
| 3.9                | 116.9      | 2.5 | 1.7 | 120.5       | 2.7 | 1.9 | 100.2       |
| 4.3                | 117.8      | 2.4 | 1.5 | 118.7       | 2.7 | 2.0 | 95.6        |

| Dates <sup>c</sup> |            |     |     |             |     |     | % conc<br>d |
|--------------------|------------|-----|-----|-------------|-----|-----|-------------|
| 35U                | 206Pb/238U |     |     | 208Pb/232Th |     |     |             |
| 2σ                 | Age (Ma)   | 2σ* | 2σ  | Age (Ma)    | 2σ* | 2σ  |             |
| 4.4                | 117.5      | 2.3 | 1.5 | 118.2       | 2.6 | 1.9 | 99.2        |
| 4.9                | 118.2      | 2.4 | 1.6 | 121.1       | 2.4 | 1.5 | 91.6        |
| 5.1                | 117.8      | 2.6 | 1.9 | 117.6       | 2.3 | 1.5 | 99.1        |
| 3.9                | 117.7      | 2.2 | 1.2 | 121.7       | 2.3 | 1.3 | 98.2        |
| 4.5                | 120.7      | 2.4 | 1.5 | 122.5       | 2.5 | 1.6 | 96.7        |
| 3.5                | 119.1      | 2.2 | 1.3 | 121.0       | 2.2 | 1.3 | 94.7        |
| 4.5                | 118.2      | 2.4 | 1.6 | 120.5       | 2.3 | 1.4 | 93.7        |
| 4.7                | 119.7      | 2.4 | 1.6 | 121.6       | 2.3 | 1.4 | 95.0        |
| 8.7                | 121.4      | 3.2 | 2.5 |             |     |     | 85.2        |
| 8.8                | 122.8      | 3.2 | 2.6 |             |     |     | 89.3        |
| 9.8                | 120.0      | 3.7 | 3.2 |             |     |     | 90.9        |
| 10.6               | 118.7      | 3.7 | 3.2 |             |     |     | 93.2        |
| 9.4                | 115.6      | 5.6 | 5.3 |             |     |     | 92.6        |
| 7.5                | 119.9      | 3.2 | 2.6 |             |     |     | 92.5        |
| 7.3                | 117.1      | 3.2 | 2.7 |             |     |     | 94.9        |
| 9.5                | 119.9      | 3.6 | 3.1 |             |     |     | 96.6        |
| 8.0                | 120.2      | 3.4 | 2.8 |             |     |     | 97.4        |
| 9.5                | 118.8      | 3.7 | 3.2 |             |     |     | 97.4        |
| 10.1               | 123.2      | 4.1 | 3.6 |             |     |     | 102.4       |
| 9.3                | 124.3      | 3.7 | 3.2 |             |     |     | 102.5       |
| 9.0                | 120.3      | 3.6 | 3.1 |             |     |     | 98.2        |
| 9.6                | 119.9      | 3.8 | 3.3 |             |     |     | 98.7        |
| 9.1                | 121.5      | 3.8 | 3.3 |             |     |     | 100.3       |
| 11.3               | 122.2      | 4.1 | 3.6 |             |     |     | 86.2        |
| 7.8                | 121.4      | 3.6 | 3.1 |             |     |     | 89.8        |
| 13.3               | 120.7      | 4.6 | 4.2 |             |     |     | 90.5        |
| 19.7               | 118.3      | 7.2 | 6.9 |             |     |     | 92.7        |

| Dates <sup>c</sup> |            |     |     |             |     |    |  | % conc<br>d |
|--------------------|------------|-----|-----|-------------|-----|----|--|-------------|
| 35U                | 206Pb/238U |     |     | 208Pb/232Th |     |    |  |             |
| 2σ                 | Age (Ma)   | 2σ* | 2σ  | Age (Ma)    | 2σ* | 2σ |  |             |
| 9.4                | 121.5      | 3.2 | 2.5 |             |     |    |  | 93.2        |
| 8.6                | 122.4      | 3.8 | 3.2 |             |     |    |  | 95.2        |
| 15.1               | 120.6      | 6.2 | 5.9 |             |     |    |  | 103.4       |
| 13.0               | 119.7      | 5.8 | 5.4 |             |     |    |  | 102.8       |
| 7.3                | 122.9      | 3.3 | 2.7 |             |     |    |  | 97.3        |
| 9.4                | 121.2      | 3.3 | 2.7 |             |     |    |  | 97.2        |
| 18.0               | 122.0      | 7.3 | 7.0 |             |     |    |  | 101.9       |
| 11.4               | 121.6      | 4.5 | 4.0 |             |     |    |  | 98.3        |
| 7.5                | 123.4      | 3.1 | 2.4 |             |     |    |  | 98.9        |
| 16.2               | 118.7      | 6.8 | 6.5 |             |     |    |  | 100.2       |
| 13.0               | 121.3      | 5.6 | 5.3 |             |     |    |  | 100.5       |
| 13.5               | 120.8      | 5.1 | 4.7 |             |     |    |  | 100.7       |

|      |       |     |     |       |     |     |       |
|------|-------|-----|-----|-------|-----|-----|-------|
| 8.2  | 119.6 | 3.5 | 2.9 | 116.8 | 6.7 | 6.4 | 92.3  |
| 9.9  | 118.7 | 3.6 | 3.1 | 118.8 | 7.0 | 6.8 | 87.9  |
| 8.9  | 118.3 | 3.6 | 3.1 | 119.6 | 6.1 | 5.8 | 94.0  |
| 8.8  | 119.1 | 3.5 | 2.9 | 113.0 | 7.3 | 7.1 | 91.2  |
| 7.0  | 120.3 | 3.5 | 3.0 |       |     |     | 101.4 |
| 12.0 | 116.3 | 4.5 | 4.1 |       |     |     | 95.6  |
| 9.9  | 115.9 | 3.9 | 3.5 | 119.7 | 6.5 | 6.2 | 98.0  |
| 10.2 | 118.6 | 4.3 | 3.9 | 116.1 | 6.1 | 5.8 | 97.9  |
| 7.8  | 119.6 | 3.6 | 3.1 | 118.0 | 7.6 | 7.4 | 95.7  |
| 7.2  | 117.9 | 3.3 | 2.7 | 116.4 | 5.3 | 5.0 | 99.9  |
| 8.3  | 117.4 | 3.2 | 2.7 | 118.4 | 4.6 | 4.2 | 97.8  |
| 8.6  | 118.7 | 3.1 | 2.5 | 117.9 | 7.1 | 6.8 | 98.3  |
| 9.1  | 117.1 | 3.1 | 2.5 | 110.1 | 4.7 | 4.4 | 95.7  |
| 8.0  | 119.9 | 3.2 | 2.6 | 121.2 | 6.3 | 6.0 | 105.8 |
| 7.9  | 119.2 | 3.1 | 2.5 | 119.3 | 6.5 | 6.2 | 105.7 |
| 8.6  | 118.2 | 3.6 | 3.1 | 118.8 | 8.0 | 7.7 | 97.7  |



| Dates <sup>c</sup> |            |     |     |             |     |     |       | % conc<br>d |
|--------------------|------------|-----|-----|-------------|-----|-----|-------|-------------|
| 35U                | 206Pb/238U |     |     | 208Pb/232Th |     |     |       |             |
| 2σ                 | Age (Ma)   | 2σ* | 2σ  | Age (Ma)    | 2σ* | 2σ  |       |             |
| 9.7                | 119.0      | 3.8 | 3.4 | 118.0       | 6.2 | 6.0 | 101.8 |             |
| 8.2                | 119.4      | 3.8 | 3.3 | 120.1       | 7.7 | 7.4 | 96.6  |             |
| 9.3                | 118.8      | 3.2 | 2.6 | 119.5       | 4.6 | 4.2 | 88.2  |             |
| 6.0                | 120.6      | 3.0 | 2.4 | 118.6       | 5.7 | 5.4 | 107.5 |             |
| 8.2                | 115.4      | 3.5 | 3.0 | 114.5       | 5.1 | 4.8 | 88.0  |             |
| 9.8                | 120.7      | 3.6 | 3.1 |             |     |     | 87.2  |             |
| 5.7                | 117.7      | 2.8 | 2.1 | 117.5       | 5.0 | 4.6 | 95.5  |             |
| 6.3                | 118.8      | 3.0 | 2.4 | 115.8       | 5.0 | 4.7 | 94.6  |             |
| 6.3                | 118.4      | 3.1 | 2.5 | 118.1       | 5.7 | 5.4 | 96.6  |             |
| 6.8                | 120.7      | 3.4 | 2.9 | 116.4       | 4.5 | 4.1 | 103.6 |             |
| 8.6                | 121.1      | 3.5 | 2.9 | 119.1       | 3.8 | 3.4 | 93.3  |             |
| 7.4                | 119.4      | 3.2 | 2.6 | 115.4       | 4.8 | 4.5 | 99.5  |             |
| 7.1                | 117.6      | 3.0 | 2.4 | 114.1       | 3.8 | 3.4 | 96.7  |             |
| 7.4                | 119.0      | 3.1 | 2.5 | 118.2       | 5.1 | 4.8 | 97.1  |             |
| 6.8                | 117.0      | 3.0 | 2.3 | 120.9       | 5.0 | 4.7 | 96.7  |             |
| 9.4                | 121.4      | 3.7 | 3.2 | 117.4       | 4.2 | 3.8 | 97.1  |             |
| 6.6                | 118.9      | 3.0 | 2.4 |             |     |     | 100.1 |             |
| 9.0                | 117.1      | 3.1 | 2.5 | 118.3       | 4.7 | 4.4 | 95.3  |             |
| 7.7                | 119.6      | 3.2 | 2.7 | 114.8       | 3.9 | 3.5 | 97.1  |             |
| 6.4                | 118.5      | 2.8 | 2.2 | 116.3       | 8.8 | 8.6 | 100.1 |             |
| 4.5                | 119.3      | 3.0 | 2.4 | 115.4       | 4.2 | 3.8 | 108.7 |             |
| 5.6                | 120.3      | 3.0 | 2.4 | 120.0       | 4.2 | 3.8 | 88.4  |             |
| 7.5                | 122.0      | 3.2 | 2.6 | 116.9       | 4.8 | 4.5 | 84.3  |             |
| 5.7                | 121.8      | 2.9 | 2.2 | 118.7       | 4.4 | 4.1 | 103.6 |             |
| 6.3                | 118.9      | 3.2 | 2.6 | 117.9       | 5.1 | 4.8 | 96.4  |             |
| 7.3                | 119.1      | 3.2 | 2.6 | 117.2       | 4.2 | 3.8 | 97.8  |             |
| 4.9                | 117.0      | 3.1 | 2.6 | 117.0       | 4.3 | 3.9 | 96.8  |             |

| Dates <sup>c</sup> |            |     |             |          |     |     | % conc<br>d |
|--------------------|------------|-----|-------------|----------|-----|-----|-------------|
| 35U                | 206Pb/238U |     | 208Pb/232Th |          |     |     |             |
| 2σ                 | Age (Ma)   | 2σ* | 2σ          | Age (Ma) | 2σ* | 2σ  |             |
| 4.6                | 119.8      | 3.1 | 2.4         | 117.8    | 4.5 | 4.1 | 100.6       |
| 6.9                | 120.7      | 3.5 | 3.0         | 117.2    | 5.1 | 4.7 | 97.4        |
| 6.7                | 119.1      | 3.3 | 2.7         | 116.9    | 3.3 | 2.8 | 99.3        |
| 6.4                | 122.0      | 3.3 | 2.7         | 120.8    | 4.3 | 3.9 | 103.8       |
| 7.3                | 119.7      | 3.1 | 2.4         | 114.3    | 4.7 | 4.3 | 98.9        |
| 4.8                | 121.8      | 3.0 | 2.3         | 118.5    | 4.2 | 3.8 | 101.5       |
| 7.9                | 117.1      | 3.3 | 2.8         | 118.8    | 4.7 | 4.3 | 94.6        |
| 5.4                | 121.5      | 3.1 | 2.5         | 114.1    | 4.3 | 3.9 | 100.9       |
| 15.8               | 122.8      | 2.9 | 2.2         |          |     |     | 69.0        |
| 5.7                | 116.0      | 2.8 | 2.2         |          |     |     | 102.3       |
| 4.4                | 118.7      | 2.5 | 1.8         | 116.3    | 3.8 | 3.3 | 95.7        |
| 4.9                | 120.1      | 3.0 | 2.3         |          |     |     | 94.4        |
| 29.5               | 121.1      | 5.1 | 4.7         |          |     |     | 104.6       |
| 3.4                | 119.5      | 2.5 | 1.7         | 118.7    | 3.2 | 2.6 | 98.5        |
| 6.3                | 119.2      | 2.7 | 1.9         | 119.2    | 3.1 | 2.6 | 98.6        |
| 4.1                | 117.8      | 2.6 | 1.8         | 118.9    | 3.2 | 2.7 | 98.8        |
| 4.3                | 119.0      | 2.8 | 2.1         | 118.8    | 3.5 | 3.0 | 95.0        |
| 4.3                | 120.4      | 2.7 | 2.0         | 117.6    | 3.3 | 2.8 | 101.1       |
| 4.6                | 117.9      | 2.6 | 1.8         | 116.6    | 3.3 | 2.8 | 96.3        |
| 3.4                | 119.1      | 2.6 | 1.8         | 118.3    | 3.3 | 2.8 | 96.4        |
| 4.3                | 119.6      | 3.3 | 2.7         |          |     |     | 95.2        |
| 3.2                | 118.3      | 2.8 | 2.1         | 119.7    | 3.4 | 2.9 | 96.7        |
| 13.5               | 123.8      | 2.8 | 2.1         |          |     |     | 73.3        |
| 16.5               | 122.3      | 3.5 | 2.9         |          |     |     | 62.0        |
| 10.1               | 122.1      | 3.7 | 3.2         |          |     |     | 73.1        |
| 7.9                | 121.8      | 3.7 | 3.1         |          |     |     | 82.6        |
| 6.9                | 119.4      | 3.1 | 2.4         |          |     |     | 84.5        |

| Dates <sup>c</sup> |            |     |             |          |     |    | % conc<br>d |
|--------------------|------------|-----|-------------|----------|-----|----|-------------|
| <sup>35</sup> U    | 206Pb/238U |     | 208Pb/232Th |          |     |    |             |
| 2σ                 | Age (Ma)   | 2σ* | 2σ          | Age (Ma) | 2σ* | 2σ |             |
| 6.5                | 122.4      | 2.9 | 2.2         |          |     |    | 91.4        |
| 6.3                | 122.2      | 3.3 | 2.7         |          |     |    | 91.4        |
| 7.4                | 120.9      | 3.2 | 2.6         |          |     |    | 91.8        |
| 6.1                | 121.9      | 3.5 | 2.9         |          |     |    | 91.5        |
| 5.9                | 117.5      | 2.8 | 2.2         |          |     |    | 93.2        |
| 5.5                | 118.0      | 2.8 | 2.1         |          |     |    | 95.8        |
| 5.2                | 118.0      | 2.9 | 2.3         |          |     |    | 104.6       |
| 5.3                | 119.5      | 3.2 | 2.6         |          |     |    | 96.8        |
| 5.5                | 122.6      | 3.0 | 2.3         |          |     |    | 101.8       |
| 11.0               | 121.4      | 4.8 | 4.4         |          |     |    | 75.4        |
| 9.4                | 121.8      | 2.9 | 2.2         |          |     |    | 77.2        |
| 13.4               | 118.3      | 6.4 | 6.1         |          |     |    | 80.2        |
| 5.8                | 120.3      | 2.9 | 2.3         |          |     |    | 81.0        |
| 7.0                | 123.3      | 2.9 | 2.2         |          |     |    | 82.4        |
| 9.9                | 116.1      | 5.5 | 5.2         |          |     |    | 88.7        |
| 5.3                | 121.7      | 2.8 | 2.0         |          |     |    | 91.2        |
| 4.9                | 125.6      | 2.8 | 2.1         |          |     |    | 91.5        |
| 13.0               | 116.9      | 7.2 | 6.9         |          |     |    | 92.7        |
| 4.3                | 121.8      | 2.9 | 2.2         |          |     |    | 93.8        |
| 4.5                | 122.3      | 2.8 | 2.0         |          |     |    | 94.9        |
| 8.3                | 119.3      | 4.9 | 4.5         |          |     |    | 96.6        |
| 6.0                | 121.9      | 3.6 | 3.1         |          |     |    | 97.3        |
| 15.0               | 115.5      | 8.9 | 8.6         |          |     |    | 99.7        |
| 13.4               | 115.4      | 8.0 | 7.8         |          |     |    | 100.1       |
| 8.7                | 123.2      | 2.5 | 1.7         |          |     |    | 61.2        |
| 6.6                | 122.6      | 2.5 | 1.7         |          |     |    | 72.8        |
| 4.6                | 120.4      | 2.4 | 1.6         |          |     |    | 70.1        |

| Dates <sup>c</sup> |                                     |     |     |                                      |     |    | % conc<br>d |
|--------------------|-------------------------------------|-----|-----|--------------------------------------|-----|----|-------------|
| <sup>35</sup> U    | <sup>206</sup> Pb/ <sup>238</sup> U |     |     | <sup>208</sup> Pb/ <sup>232</sup> Th |     |    |             |
| 2σ                 | Age (Ma)                            | 2σ* | 2σ  | Age (Ma)                             | 2σ* | 2σ |             |
| 15.6               | 127.3                               | 3.0 | 2.3 |                                      |     |    | 44.8        |
| 11.7               | 124.5                               | 2.7 | 1.9 |                                      |     |    | 56.6        |
| 19.2               | 127.1                               | 3.1 | 2.4 |                                      |     |    | 47.9        |
| 8.9                | 123.3                               | 2.6 | 1.8 |                                      |     |    | 70.6        |
| 11.7               | 134.4                               | 3.2 | 2.5 |                                      |     |    | 45.8        |
| 6.1                | 120.8                               | 2.9 | 2.2 |                                      |     |    | 61.8        |
| 6.1                | 121.4                               | 2.8 | 2.1 |                                      |     |    | 74.1        |
| 9.9                | 122.9                               | 2.8 | 2.1 |                                      |     |    | 58.9        |
| 12.8               | 135.9                               | 3.3 | 2.5 |                                      |     |    | 37.2        |
| 12.9               | 137.7                               | 3.3 | 2.5 |                                      |     |    | 33.7        |
| 22.3               | 134.6                               | 4.5 | 3.9 |                                      |     |    | 42.4        |
| 15.1               | 146.9                               | 3.4 | 2.5 |                                      |     |    | 28.0        |
| 12.3               | 129.6                               | 3.2 | 2.5 |                                      |     |    | 46.5        |
| 8.8                | 124.2                               | 3.2 | 2.5 |                                      |     |    | 70.4        |

Table S-3 other bastnasite samples calibrated by XN01

| Analysis date      | Sample | U-Pb Concentration <sup>a</sup> |       |         | Th/U | Data for Tera-Wasserburg plot <sup>b</sup> |              |              |              |              |            | rho    | 208Pb/232Th |            | 207Pb/206Pb  |              | 207Pb/235U |            |            |            |            |            |            |
|--------------------|--------|---------------------------------|-------|---------|------|--------------------------------------------|--------------|--------------|--------------|--------------|------------|--------|-------------|------------|--------------|--------------|------------|------------|------------|------------|------------|------------|------------|
|                    |        | age                             | Pb    | Th      |      | U                                          | 238U/206Pb   |              | 207Pb/206Pb  |              |            |        | 207Pb/235U  |            | 206Pb/238U   |              |            |            |            |            |            |            |            |
|                    |        |                                 |       |         |      |                                            | Ratio        | 2 $\sigma$ * | Ratio        | 2 $\sigma$ * | 2 $\sigma$ |        | Ratio       | 2 $\sigma$ | Ratio        | 2 $\sigma$ * | 2 $\sigma$ | Ratio      | 2 $\sigma$ | Age (Ma)   | 2 $\sigma$ | Age (Ma)   | 2 $\sigma$ |
|                    |        | Ma                              | ppm   |         |      | Ratio                                      | 2 $\sigma$ * | Ratio        | 2 $\sigma$ * | 2 $\sigma$   | Ratio      |        | 2 $\sigma$  | Ratio      | 2 $\sigma$ * | 2 $\sigma$   | Ratio      | 2 $\sigma$ | Age (Ma)   | 2 $\sigma$ | Age (Ma)   | 2 $\sigma$ |            |
| 32 $\mu$ m2J4Hz3N2 |        |                                 |       |         |      |                                            |              |              |              |              |            |        |             |            |              |              |            |            |            |            |            |            |            |
| 11227a4            | TPZ    | 440.6                           | 129.7 | 7497.8  | 60.2 | 125                                        | 14.31        | 0.32         | 0.0851       | 0.0034       | 0.0031     | 0.8156 | 0.0309      | 0.0699     | 0.0019       | 0.0016       | 0.59       | 0.02098    | 0.00035    | 1317.6     | 65.7       | 605.6      | 17.3       |
| 11227a8            | TPZ    | 440.6                           | 151.1 | 8682.2  | 51.5 | 168                                        | 11.18        | 0.33         | 0.2434       | 0.0175       | 0.0171     | 3.1458 | 0.2767      | 0.0894     | 0.0029       | 0.0026       | 0.33       | 0.02161    | 0.00031    | 3142.3     | 112.0      | 1444.0     | 67.8       |
| 11227a10           | TPZ    | 440.6                           | 122.8 | 6267.6  | 96.9 | 65                                         | 11.26        | 0.52         | 0.1769       | 0.0159       | 0.0157     | 2.1625 | 0.1623      | 0.0888     | 0.0043       | 0.0041       | 0.62       | 0.02229    | 0.00051    | 2624.4     | 147.8      | 1169.1     | 52.1       |
| 11227a7            | TPZ    | 440.6                           | 237.2 | 13761.9 | 34.0 | 404                                        | 14.08        | 0.30         | 0.0839       | 0.0036       | 0.0033     | 0.8198 | 0.0354      | 0.0710     | 0.0019       | 0.0015       | 0.49       | 0.02170    | 0.00029    | 1300.0     | 77.5       | 607.9      | 19.8       |
| 11227a9            | TPZ    | 440.6                           | 114.3 | 6282.9  | 46.7 | 135                                        | 13.67        | 0.24         | 0.0781       | 0.0029       | 0.0026     | 0.7853 | 0.0276      | 0.0732     | 0.0017       | 0.0013       | 0.49       | 0.02186    | 0.00033    | 1150.0     | 67.1       | 588.5      | 15.7       |
| 11227a14           | TPZ    | 440.6                           | 125.0 | 7035.9  | 54.4 | 129                                        | 13.81        | 0.23         | 0.0746       | 0.0030       | 0.0028     | 0.7429 | 0.0293      | 0.0724     | 0.0016       | 0.0012       | 0.43       | 0.02203    | 0.00030    | 1057.4     | 71.3       | 564.1      | 17.0       |
| 11227a13           | TPZ    | 440.6                           | 116.1 | 6436.1  | 52.5 | 123                                        | 13.84        | 0.23         | 0.0714       | 0.0028       | 0.0026     | 0.7089 | 0.0252      | 0.0722     | 0.0016       | 0.0012       | 0.46       | 0.02236    | 0.00036    | 968.5      | 74.1       | 544.1      | 15.0       |
| 11227a12           | TPZ    | 440.6                           | 65.2  | 3531.1  | 51.9 | 68                                         | 14.02        | 0.24         | 0.0755       | 0.0028       | 0.0025     | 0.7399 | 0.0247      | 0.0713     | 0.0016       | 0.0012       | 0.51       | 0.02256    | 0.00043    | 1083.3     | 68.5       | 562.4      | 14.4       |
| 11227a11           | TPZ    | 440.6                           | 72.7  | 3843.8  | 53.1 | 72                                         | 13.20        | 0.23         | 0.0891       | 0.0055       | 0.0053     | 0.9568 | 0.0532      | 0.0758     | 0.0018       | 0.0013       | 0.31       | 0.02270    | 0.00031    | 1407.1     | 114.0      | 681.7      | 27.6       |
| 11227a5            | TPZ    | 440.6                           | 161.3 | 8741.4  | 67.7 | 129                                        | 13.78        | 0.26         | 0.0722       | 0.0023       | 0.0021     | 0.7217 | 0.0247      | 0.0726     | 0.0018       | 0.0014       | 0.56       | 0.02265    | 0.00031    | 992.3      | 58.8       | 551.6      | 14.6       |
| 11227a6            | TPZ    | 440.6                           | 142.5 | 7536.5  | 73.0 | 103                                        | 13.79        | 0.28         | 0.0709       | 0.0024       | 0.0021     | 0.7078 | 0.0249      | 0.0725     | 0.0018       | 0.0015       | 0.58       | 0.02272    | 0.00031    | 953.7      | 59.3       | 543.5      | 14.8       |
| 11227a22           | MNP    | 35.9                            | 10.9  | 9214.4  | 14.7 | 625                                        | 31.00        | 3.55         | 0.6751       | 0.0440       | 0.0428     | 3.1547 | 0.4467      | 0.0323     | 0.0037       | 0.0037       | 0.81       | 0.00129    | 0.00003    | 4678.7     | 94.4       | 1446.1     | 109.2      |
| 11227a23           | MNP    | 35.9                            | 12.6  | 12035.8 | 17.5 | 689                                        | 100.68       | 5.87         | 0.4372       | 0.0371       | 0.0365     | 0.5816 | 0.0509      | 0.0099     | 0.0006       | 0.0006       | 0.67       | 0.00131    | 0.00003    | 4042.3     | 124.7      | 465.5      | 32.7       |
| 11227a24           | MNP    | 35.9                            | 11.0  | 10364.6 | 14.0 | 739                                        | 109.65       | 5.89         | 0.3214       | 0.0294       | 0.0290     | 0.3807 | 0.0293      | 0.0091     | 0.0005       | 0.0005       | 0.70       | 0.00131    | 0.00004    | 3576.2     | 138.9      | 327.6      | 21.6       |
| 11227a25           | MNP    | 35.9                            | 7.9   | 7708.0  | 9.3  | 824                                        | 89.70        | 5.96         | 0.4240       | 0.0442       | 0.0437     | 0.5981 | 0.0497      | 0.0111     | 0.0008       | 0.0007       | 0.80       | 0.00132    | 0.00003    | 3998.2     | 154.9      | 476.1      | 31.6       |
| 11227a26           | MNP    | 35.9                            | 8.0   | 7805.5  | 9.2  | 845                                        | 97.97        | 6.99         | 0.3931       | 0.0594       | 0.0591     | 0.4719 | 0.0453      | 0.0102     | 0.0007       | 0.0007       | 0.74       | 0.00132    | 0.00003    | 3883.0     | 228.2      | 392.5      | 31.3       |
| 11227a27           | MNP    | 35.9                            | 11.5  | 11027.2 | 22.0 | 501                                        | 124.13       | 5.90         | 0.3340       | 0.0334       | 0.0330     | 0.3545 | 0.0296      | 0.0081     | 0.0004       | 0.0004       | 0.57       | 0.00132    | 0.00004    | 3635.5     | 151.9      | 308.1      | 22.2       |
| 11227a28           | MNP    | 35.9                            | 8.0   | 8083.3  | 9.5  | 852                                        | 98.92        | 7.08         | 0.3875       | 0.0444       | 0.0440     | 0.4896 | 0.0473      | 0.0101     | 0.0007       | 0.0007       | 0.74       | 0.00134    | 0.00003    | 3861.4     | 172.2      | 404.7      | 32.3       |
| 11227a29           | MNP    | 35.9                            | 8.0   | 7941.2  | 9.4  | 848                                        | 98.37        | 6.27         | 0.4238       | 0.0495       | 0.0491     | 0.5370 | 0.0480      | 0.0102     | 0.0007       | 0.0006       | 0.71       | 0.00134    | 0.00003    | 3996.0     | 174.1      | 436.5      | 31.7       |
| 11227a30           | MNP    | 35.9                            | 8.5   | 8460.8  | 9.7  | 874                                        | 88.49        | 5.38         | 0.4081       | 0.0556       | 0.0553     | 0.5742 | 0.0508      | 0.0113     | 0.0007       | 0.0007       | 0.69       | 0.00134    | 0.00003    | 3939.2     | 204.6      | 460.7      | 32.8       |
| 11227a31           | MNP    | 35.9                            | 10.6  | 10344.6 | 13.8 | 752                                        | 114.59       | 7.06         | 0.3310       | 0.0393       | 0.0390     | 0.3676 | 0.0337      | 0.0087     | 0.0006       | 0.0005       | 0.67       | 0.00135    | 0.00003    | 3621.9     | 181.5      | 317.9      | 25.0       |
| 11227a32           | MNP    | 35.9                            | 11.0  | 9399.5  | 3.4  | 2805                                       | 54.73        | 4.76         | 0.8941       | 0.9292       | 0.9291     | 1.4117 | 0.1351      | 0.0183     | 0.0016       | 0.0016       | 0.91       | 0.00137    | 0.00004    | error      | error      | 893.9      | 56.9       |
| 11227a33           | MNP    | 35.9                            | 10.4  | 8819.1  | 3.3  | 2661                                       | 60.63        | 5.78         | 0.5924       | 0.1046       | 0.1042     | 1.0554 | 0.0988      | 0.0165     | 0.0016       | 0.0016       | 1.03       | 0.00138    | 0.00003    | 4489.5     | 283.3      | 731.6      | 48.8       |
| 11227a34           | MNP    | 35.9                            | 10.9  | 9317.7  | 3.4  | 2722                                       | 54.42        | 5.01         | 0.6448       | 0.1348       | 0.1344     | 1.2309 | 0.1038      | 0.0184     | 0.0017       | 0.0017       | 1.26       | 0.00142    | 0.00003    | 4612.7     | 340.7      | 814.7      | 47.2       |
| 11227a35           | MNP    | 35.9                            | 11.0  | 9249.6  | 3.3  | 2763                                       | 55.78        | 4.77         | 0.6839       | 0.1356       | 0.1352     | 1.3337 | 0.1358      | 0.0179     | 0.0016       | 0.0015       | 0.84       | 0.00154    | 0.00004    | 4697.3     | 319.6      | 860.5      | 59.1       |
| 11227a36           | MNP    | 35.9                            | 8.3   | 8226.0  | 9.6  | 853                                        | 98.53        | 6.50         | 0.4212       | 0.0599       | 0.0596     | 0.5306 | 0.0519      | 0.0101     | 0.0007       | 0.0007       | 0.67       | 0.00156    | 0.00004    | 3986.7     | 213.2      | 432.2      | 34.4       |
| 11227a37           | MNP    | 35.9                            | 7.2   | 7324.3  | 9.4  | 783                                        | 100.33       | 5.70         | 0.4043       | 0.0480       | 0.0476     | 0.5120 | 0.0471      | 0.0100     | 0.0006       | 0.0006       | 0.62       | 0.00158    | 0.00004    | 3925.3     | 177.8      | 419.8      | 31.6       |
| 11227a38           | MNP    | 35.9                            | 7.7   | 7720.8  | 9.4  | 825                                        | 84.55        | 4.86         | 0.4468       | 0.0518       | 0.0514     | 0.6702 | 0.0579      | 0.0118     | 0.0007       | 0.0007       | 0.66       | 0.00158    | 0.00004    | 4074.6     | 172.0      | 520.9      | 35.2       |
| 32 $\mu$ m3J5Hz3N2 |        |                                 |       |         |      |                                            |              |              |              |              |            |        |             |            |              |              |            |            |            |            |            |            |            |
| 11231A16           | TPZ    | 417                             | 126.7 | 8328.8  | 23.6 | 353                                        | 14.35        | 0.43         | 0.1258       | 0.0139       | 0.0137     | 1.2147 | 0.1489      | 0.0697     | 0.0024       | 0.0021       | 0.25       | 0.01896    | 0.00039    | 2040.4     | 193.4      | 807.4      | 68.3       |

| Analysis date | Sample | U-Pb age | Concentration <sup>a</sup> |         |      |            | Th/U   | Data for Tera-Wasserburg plot <sup>b</sup> |        |              |            |            |            | rho    | 208Pb/232Th |            | 207Pb/206Pb |            | 207Pb/235U |            |        |              |            |
|---------------|--------|----------|----------------------------|---------|------|------------|--------|--------------------------------------------|--------|--------------|------------|------------|------------|--------|-------------|------------|-------------|------------|------------|------------|--------|--------------|------------|
|               |        |          | Pb                         | Th      | U    | 238U/206Pb |        | 207Pb/206Pb                                |        | 207Pb/235U   |            | 206Pb/238U |            |        | Ratio       | 2 $\sigma$ | Age (Ma)    | 2 $\sigma$ | Age (Ma)   | 2 $\sigma$ |        |              |            |
|               |        |          |                            |         |      | Ratio      |        | 2 $\sigma^*$                               | Ratio  | 2 $\sigma^*$ | 2 $\sigma$ | Ratio      | 2 $\sigma$ |        |             |            |             |            |            |            | Ratio  | 2 $\sigma^*$ | 2 $\sigma$ |
| 11231A21      | TPZ    | 417      | 105.4                      | 6905.9  | 17.5 | 395        | 14.75  | 0.30                                       | 0.0915 | 0.0070       | 0.0069     | 0.8460     | 0.0455     | 0.0678 | 0.0017      | 0.0014     | 0.38        | 0.01917    | 0.00034    | 1457.4     | 143.7  | 622.5        | 25.0       |
| 11231A30      | TPZ    | 417      | 77.7                       | 4791.8  | 38.8 | 123        | 13.85  | 0.23                                       | 0.1145 | 0.0059       | 0.0057     | 1.1386     | 0.0574     | 0.0722 | 0.0016      | 0.0012     | 0.34        | 0.01985    | 0.00035    | 1871.9     | 89.5   | 771.9        | 27.3       |
| 11231A29      | TPZ    | 417      | 105.3                      | 6121.7  | 40.2 | 152        | 11.42  | 0.76                                       | 0.1889 | 0.0304       | 0.0302     | 2.7401     | 0.6385     | 0.0875 | 0.0060      | 0.0058     | 0.29        | 0.02035    | 0.00037    | 2732.4     | 265.6  | 1339.4       | 173.3      |
| 11231A9       | TPZ    | 417      | 156.3                      | 9253.7  | 12.8 | 724        | 13.02  | 0.31                                       | 0.1400 | 0.0094       | 0.0092     | 1.5261     | 0.0957     | 0.0768 | 0.0021      | 0.0018     | 0.37        | 0.02109    | 0.00037    | 2227.8     | 113.7  | 941.0        | 38.5       |
| 11231A31      | TPZ    | 417      | 193.3                      | 10748.2 | 46.5 | 231        | 6.78   | 0.91                                       | 0.3923 | 0.0528       | 0.0525     | 9.7690     | 2.2163     | 0.1476 | 0.0200      | 0.0199     | 0.59        | 0.02216    | 0.00055    | 3879.9     | 202.8  | 2413.2       | 209.0      |
| 11231A32      | TPZ    | 417      | 225.6                      | 12433.7 | 44.6 | 279        | 10.88  | 0.51                                       | 0.1928 | 0.0222       | 0.0220     | 2.7146     | 0.4248     | 0.0919 | 0.0045      | 0.0043     | 0.30        | 0.02290    | 0.00037    | 2766.4     | 188.6  | 1332.5       | 116.1      |
| 11231A50      | MNP    | 38.2     | 10.6                       | 8311.4  | 3.5  | 2360       | 56.51  | 5.41                                       | 0.4440 | 0.2504       | 0.2503     | 1.3045     | 0.1832     | 0.0177 | 0.0017      | 0.0017     | 0.68        | 0.00163    | 0.00004    | 4065.2     | 1292.0 | 847.7        | 80.7       |
| 11231A51      | MNP    | 38.2     | 11.0                       | 10229.6 | 11.0 | 926        | 75.82  | 4.87                                       | 0.4880 | 0.0509       | 0.0504     | 0.8674     | 0.0698     | 0.0132 | 0.0009      | 0.0008     | 0.80        | 0.00139    | 0.00003    | 4205.4     | 153.1  | 634.1        | 37.9       |
| 11231A52      | MNP    | 38.2     | 10.9                       | 10269.5 | 10.9 | 942        | 90.07  | 6.35                                       | 0.4042 | 0.0625       | 0.0622     | 0.5620     | 0.0553     | 0.0111 | 0.0008      | 0.0008     | 0.72        | 0.00137    | 0.00003    | 3925.0     | 233.3  | 452.8        | 36.0       |
| 11231A54      | MNP    | 38.2     | 11.2                       | 10512.9 | 11.6 | 908        | 97.48  | 6.64                                       | 0.3685 | 0.0672       | 0.0670     | 0.4683     | 0.0467     | 0.0103 | 0.0007      | 0.0007     | 0.68        | 0.00137    | 0.00003    | 3787.0     | 278.5  | 390.0        | 32.3       |
| 11231A56      | MNP    | 38.2     | 10.8                       | 10085.7 | 14.9 | 676        | 109.85 | 6.53                                       | 0.3281 | 0.0405       | 0.0402     | 0.3950     | 0.0326     | 0.0091 | 0.0006      | 0.0005     | 0.72        | 0.00137    | 0.00002    | 3608.3     | 189.3  | 338.0        | 23.7       |
| 11231A59      | MNP    | 38.2     | 12.0                       | 10319.6 | 12.7 | 811        | 25.23  | 6.37                                       | 0.4976 | 0.0573       | 0.0568     | 3.8514     | 1.1956     | 0.0396 | 0.0100      | 0.0100     | 0.81        | 0.00145    | 0.00004    | 4234.3     | 169.2  | 1603.6       | 250.2      |
| 11231A60      | MNP    | 38.2     | 10.6                       | 9577.2  | 15.4 | 620        | 83.36  | 6.91                                       | 0.4310 | 0.0565       | 0.0561     | 0.7862     | 0.1678     | 0.0120 | 0.0010      | 0.0010     | 0.39        | 0.00139    | 0.00002    | 4021.3     | 195.6  | 589.0        | 95.4       |
| 11231A62      | MNP    | 38.2     | 14.1                       | 10075.3 | 6.7  | 1501       | 58.74  | 3.78                                       | 0.6017 | 0.0803       | 0.0798     | 1.2989     | 0.0946     | 0.0170 | 0.0011      | 0.0011     | 0.88        | 0.00181    | 0.00004    | 4512.2     | 193.8  | 845.2        | 41.8       |
| 11231A69      | MNP    | 38.2     | 7.6                        | 7194.4  | 10.8 | 666        | 115.64 | 8.39                                       | 0.4131 | 0.0818       | 0.0815     | 0.4179     | 0.0416     | 0.0086 | 0.0006      | 0.0006     | 0.73        | 0.00133    | 0.00003    | 3957.4     | 300.4  | 354.5        | 29.8       |
| 11231A71      | MNP    | 38.2     | 7.8                        | 7182.7  | 10.3 | 700        | 98.65  | 7.20                                       | 0.3764 | 0.0654       | 0.0651     | 0.4700     | 0.0463     | 0.0101 | 0.0008      | 0.0007     | 0.74        | 0.00137    | 0.00003    | 3817.6     | 264.8  | 391.2        | 32.0       |
| 11231A72      | MNP    | 38.2     | 8.1                        | 7443.2  | 11.4 | 651        | 94.58  | 6.02                                       | 0.3500 | 0.0569       | 0.0566     | 0.4825     | 0.0344     | 0.0106 | 0.0007      | 0.0007     | 0.89        | 0.00138    | 0.00003    | 3707.1     | 249.2  | 399.8        | 23.6       |
| 11231A75      | MNP    | 38.2     | 8.0                        | 7517.8  | 10.2 | 736        | 112.03 | 7.55                                       | 0.3128 | 0.0440       | 0.0437     | 0.3896     | 0.0431     | 0.0089 | 0.0006      | 0.0006     | 0.61        | 0.00137    | 0.00003    | 3534.5     | 216.5  | 334.1        | 31.5       |
| 11231A77      | MNP    | 38.2     | 7.7                        | 7186.9  | 10.0 | 715        | 116.78 | 10.05                                      | 0.4049 | 0.0773       | 0.0770     | 0.3876     | 0.0361     | 0.0086 | 0.0007      | 0.0007     | 0.92        | 0.00135    | 0.00003    | 3927.5     | 289.8  | 332.6        | 26.4       |
| 11231A78      | MNP    | 38.2     | 7.3                        | 6734.4  | 9.7  | 697        | 103.24 | 8.27                                       | 0.4137 | 0.0688       | 0.0685     | 0.4842     | 0.0546     | 0.0097 | 0.0008      | 0.0008     | 0.71        | 0.00136    | 0.00003    | 3961.1     | 250.9  | 400.9        | 37.4       |
| 11231A80      | MNP    | 38.2     | 7.5                        | 6802.2  | 9.5  | 718        | 62.39  | 5.32                                       | 0.5839 | 0.0771       | 0.0766     | 1.1489     | 0.1180     | 0.0160 | 0.0014      | 0.0014     | 0.83        | 0.00138    | 0.00003    | 4468.5     | 192.3  | 776.7        | 55.7       |
| 11231A81      | MNP    | 38.2     | 9.4                        | 8831.6  | 18.1 | 488        | 126.85 | 6.25                                       | 0.2885 | 0.0375       | 0.0373     | 0.3043     | 0.0318     | 0.0079 | 0.0004      | 0.0004     | 0.47        | 0.00135    | 0.00003    | 3409.6     | 201.4  | 269.8        | 24.8       |
| 11231A82      | MNP    | 38.2     | 6.8                        | 6384.8  | 9.3  | 686        | 96.16  | 6.71                                       | 0.3540 | 0.0530       | 0.0527     | 0.4638     | 0.0504     | 0.0104 | 0.0007      | 0.0007     | 0.64        | 0.00137    | 0.00003    | 3724.4     | 228.7  | 386.9        | 35.0       |
| 11231A83      | MNP    | 38.2     | 9.2                        | 8406.9  | 18.2 | 463        | 117.88 | 6.46                                       | 0.3201 | 0.0651       | 0.0649     | 0.3294     | 0.0341     | 0.0085 | 0.0005      | 0.0005     | 0.53        | 0.00137    | 0.00003    | 3572.2     | 317.1  | 289.1        | 26.0       |
| 11231A49      | MNP    | 38.2     | 10.7                       | 8592.4  | 3.5  | 2472       | 50.68  | 4.91                                       | 0.2967 | 0.3404       | 0.3404     | 1.2480     | 0.1764     | 0.0197 | 0.0019      | 0.0019     | 0.68        | 0.00157    | 0.00003    | 3453.4     | 1141.6 | 822.5        | 79.7       |
| 11231A53      | MNP    | 38.2     | 11.5                       | 10662.9 | 12.1 | 883        | 80.39  | 4.93                                       | 0.4047 | 0.0481       | 0.0477     | 0.6501     | 0.0521     | 0.0124 | 0.0008      | 0.0008     | 0.77        | 0.00139    | 0.00003    | 3926.9     | 177.3  | 508.5        | 32.1       |
| 11231A55      | MNP    | 38.2     | 10.9                       | 10142.8 | 11.2 | 902        | 86.94  | 5.68                                       | 0.3745 | 0.0454       | 0.0450     | 0.5471     | 0.0499     | 0.0115 | 0.0008      | 0.0008     | 0.72        | 0.00140    | 0.00003    | 3809.8     | 182.9  | 443.1        | 32.8       |

| Analysis date | Sample | U-Pb age | Concentration <sup>a</sup> |         |      | Th/U | Data for Tera-Wasserburg plot <sup>b</sup> |              |             |              |            |            |            |            |              |            |       |            | rho     | 208Pb/232Th |            | 207Pb/206Pb |            | 207Pb/235U |  |
|---------------|--------|----------|----------------------------|---------|------|------|--------------------------------------------|--------------|-------------|--------------|------------|------------|------------|------------|--------------|------------|-------|------------|---------|-------------|------------|-------------|------------|------------|--|
|               |        |          | Pb                         | Th      | U    |      | 238U/206Pb                                 |              | 207Pb/206Pb |              |            | 207Pb/235U |            | 206Pb/238U |              |            | Ratio | 2 $\sigma$ |         | Age (Ma)    | 2 $\sigma$ | Age (Ma)    | 2 $\sigma$ |            |  |
|               |        |          | Ma                         | ppm     |      |      | Ratio                                      | 2 $\sigma$ * | Ratio       | 2 $\sigma$ * | 2 $\sigma$ | Ratio      | 2 $\sigma$ | Ratio      | 2 $\sigma$ * | 2 $\sigma$ | Ratio | 2 $\sigma$ |         | Age (Ma)    | 2 $\sigma$ | Age (Ma)    | 2 $\sigma$ |            |  |
| 11231A57      | MNP    | 38.2     | 18.1                       | 10120.1 | 31.1 | 325  | 14.20                                      | 0.55         | 0.8097      | 0.0187       | 0.0141     | 7.8542     | 0.3173     | 0.0704     | 0.0029       | 0.0027     | 0.96  | 0.00185    | 0.00003 | error       | error      | 2214.4      | 36.4       |            |  |
| 11231A58      | MNP    | 38.2     | 12.9                       | 9883.3  | 12.6 | 785  | 15.70                                      | 0.55         | 0.8074      | 0.0329       | 0.0305     | 6.9902     | 0.2378     | 0.0637     | 0.0024       | 0.0022     | 1.02  | 0.00152    | 0.00003 | error       | error      | 2110.2      | 30.2       |            |  |
| 11231A61      | MNP    | 38.2     | 14.5                       | 10109.1 | 6.8  | 1481 | 56.46                                      | 3.76         | 0.4907      | 0.0600       | 0.0595     | 1.0977     | 0.0798     | 0.0177     | 0.0012       | 0.0012     | 0.92  | 0.00183    | 0.00003 | 4213.9      | 180.2      | 752.2       | 38.6       |            |  |
| 11231A63      | MNP    | 38.2     | 10.6                       | 8249.1  | 3.6  | 2264 | 56.14                                      | 5.40         | 0.4778      | 0.2425       | 0.2424     | 1.1019     | 0.1377     | 0.0178     | 0.0017       | 0.0017     | 0.77  | 0.00167    | 0.00004 | 4174.0      | 1074.0     | 754.3       | 66.5       |            |  |
| 11231A70      | MNP    | 38.2     | 8.0                        | 7326.7  | 9.8  | 748  | 79.76                                      | 6.76         | 0.3692      | 0.0547       | 0.0544     | 0.5910     | 0.0728     | 0.0125     | 0.0011       | 0.0011     | 0.69  | 0.00138    | 0.00003 | 3788.6      | 225.0      | 471.5       | 46.5       |            |  |
| 11231A73      | MNP    | 38.2     | 8.1                        | 7482.5  | 10.5 | 712  | 106.06                                     | 7.46         | 0.4402      | 0.0644       | 0.0641     | 0.5106     | 0.0439     | 0.0094     | 0.0007       | 0.0007     | 0.82  | 0.00136    | 0.00003 | 4052.3      | 218.8      | 418.9       | 29.5       |            |  |
| 11231A74      | MNP    | 38.2     | 7.6                        | 6877.5  | 10.0 | 690  | 71.84                                      | 4.80         | 0.4788      | 0.0561       | 0.0556     | 0.8387     | 0.0687     | 0.0139     | 0.0010       | 0.0009     | 0.82  | 0.00136    | 0.00003 | 4177.5      | 172.7      | 618.4       | 37.9       |            |  |
| 11231A76      | MNP    | 38.2     | 7.3                        | 6822.4  | 9.5  | 716  | 97.95                                      | 7.61         | 0.5553      | 0.4527       | 0.4526     | 0.3884     | 0.0529     | 0.0102     | 0.0008       | 0.0008     | 0.57  | 0.00136    | 0.00003 | 4395.4      | 2722.8     | 333.2       | 38.7       |            |  |
| 11231A79      | MNP    | 38.2     | 9.2                        | 8484.9  | 13.6 | 623  | 101.34                                     | 6.96         | 0.4602      | 0.0558       | 0.0553     | 0.5737     | 0.0458     | 0.0099     | 0.0007       | 0.0007     | 0.86  | 0.00138    | 0.00003 | 4120.4      | 179.4      | 460.4       | 29.5       |            |  |
| 11231_138     | Zagi   | 49.1     | 13.0                       | 8452.4  | 5.5  | 1536 | 51.84                                      | 2.98         | 0.4821      | 0.0490       | 0.0485     | 1.2070     | 0.0822     | 0.0193     | 0.0011       | 0.0011     | 0.84  | 0.00185    | 0.00003 | 4187.4      | 148.6      | 803.8       | 37.8       |            |  |
| 11231_139     | Zagi   | 49.1     | 11.2                       | 7135.7  | 4.9  | 1454 | 59.08                                      | 3.53         | 0.4605      | 0.0510       | 0.0505     | 1.0317     | 0.0777     | 0.0169     | 0.0010       | 0.0010     | 0.79  | 0.00178    | 0.00004 | 4119.4      | 163.6      | 719.8       | 38.9       |            |  |
| 11231_140     | Zagi   | 49.1     | 10.6                       | 6714.5  | 4.6  | 1465 | 55.25                                      | 2.84         | 0.4954      | 0.0459       | 0.0453     | 1.1659     | 0.0758     | 0.0181     | 0.0010       | 0.0009     | 0.79  | 0.00184    | 0.00003 | 4227.5      | 134.5      | 784.7       | 35.5       |            |  |
| 11231_141     | Zagi   | 49.1     | 9.7                        | 6036.1  | 4.2  | 1427 | 54.81                                      | 3.18         | 0.4608      | 0.0509       | 0.0504     | 1.1391     | 0.0876     | 0.0182     | 0.0011       | 0.0011     | 0.76  | 0.00181    | 0.00003 | 4120.7      | 163.2      | 772.1       | 41.6       |            |  |
| 11231_142     | Zagi   | 49.1     | 9.5                        | 5817.8  | 4.0  | 1447 | 53.37                                      | 3.19         | 0.5017      | 0.0496       | 0.0490     | 1.1975     | 0.0759     | 0.0187     | 0.0012       | 0.0011     | 0.94  | 0.00185    | 0.00004 | 4246.3      | 144.4      | 799.4       | 35.1       |            |  |
| 11231_143     | Zagi   | 49.1     | 9.0                        | 5473.7  | 3.6  | 1502 | 51.92                                      | 3.61         | 0.4801      | 0.0517       | 0.0512     | 1.1420     | 0.0824     | 0.0193     | 0.0014       | 0.0013     | 0.96  | 0.00182    | 0.00003 | 4181.3      | 158.4      | 773.4       | 39.1       |            |  |
| 11231_145     | Zagi   | 49.1     | 8.6                        | 4616.3  | 3.3  | 1399 | 53.35                                      | 3.20         | 0.4645      | 0.0542       | 0.0537     | 1.0926     | 0.0826     | 0.0187     | 0.0012       | 0.0011     | 0.79  | 0.00181    | 0.00004 | 4132.4      | 172.5      | 749.8       | 40.1       |            |  |
| 11231_146     | Zagi   | 49.1     | 8.6                        | 4315.1  | 3.0  | 1424 | 56.26                                      | 3.46         | 0.5156      | 0.0562       | 0.0556     | 1.2011     | 0.0749     | 0.0178     | 0.0011       | 0.0011     | 0.99  | 0.00172    | 0.00004 | 4286.4      | 159.4      | 801.1       | 34.5       |            |  |
| 11231_147     | Zagi   | 49.1     | 8.1                        | 3994.2  | 3.0  | 1331 | 53.65                                      | 3.26         | 0.4934      | 0.0504       | 0.0499     | 1.2409     | 0.0908     | 0.0186     | 0.0012       | 0.0011     | 0.83  | 0.00178    | 0.00004 | 4221.6      | 150.6      | 819.3       | 41.1       |            |  |
| 11231_148     | Zagi   | 49.1     | 8.2                        | 3584.4  | 2.7  | 1332 | 60.52                                      | 3.77         | 0.4406      | 0.0502       | 0.0497     | 0.9350     | 0.0653     | 0.0165     | 0.0011       | 0.0010     | 0.89  | 0.00175    | 0.00003 | 4054.0      | 168.2      | 670.3       | 34.3       |            |  |
| 11231_149     | Zagi   | 49.1     | 6.7                        | 3219.4  | 2.4  | 1329 | 57.64                                      | 3.02         | 0.4138      | 0.0455       | 0.0451     | 0.9927     | 0.0789     | 0.0174     | 0.0009       | 0.0009     | 0.66  | 0.00176    | 0.00003 | 3960.2      | 164.1      | 700.1       | 40.2       |            |  |
| 11231_151     | Zagi   | 49.1     | 5.6                        | 2206.6  | 1.8  | 1241 | 59.10                                      | 3.57         | 0.5013      | 0.0468       | 0.0462     | 1.0897     | 0.0778     | 0.0169     | 0.0011       | 0.0010     | 0.85  | 0.00179    | 0.00003 | 4244.9      | 136.1      | 748.4       | 37.8       |            |  |
| 11231_157     | Zagi   | 49.1     | 5.4                        | 463.1   | 0.7  | 698  | 53.67                                      | 3.09         | 0.5075      | 0.0697       | 0.0692     | 1.1659     | 0.0758     | 0.0186     | 0.0011       | 0.0011     | 0.89  | 0.00185    | 0.00004 | 4264.8      | 202.2      | 784.7       | 35.6       |            |  |
| 11231_158     | Zagi   | 49.1     | 4.5                        | 830.6   | 0.9  | 912  | 54.45                                      | 3.24         | 0.5052      | 0.0500       | 0.0495     | 1.2025     | 0.0837     | 0.0184     | 0.0011       | 0.0011     | 0.85  | 0.00183    | 0.00003 | 4256.5      | 144.7      | 801.7       | 38.6       |            |  |
| 11231_161     | Zagi   | 49.1     | 6.2                        | 1960.3  | 1.6  | 1224 | 52.27                                      | 3.32         | 0.5315      | 0.0561       | 0.0555     | 1.2837     | 0.0887     | 0.0191     | 0.0012       | 0.0012     | 0.92  | 0.00182    | 0.00003 | 4331.2      | 153.9      | 838.5       | 39.4       |            |  |
| 11231_162     | Zagi   | 49.1     | 6.8                        | 2289.8  | 1.8  | 1281 | 54.22                                      | 2.82         | 0.5004      | 0.0491       | 0.0485     | 1.1983     | 0.0901     | 0.0184     | 0.0010       | 0.0010     | 0.69  | 0.00176    | 0.00004 | 4242.3      | 143.4      | 799.8       | 41.6       |            |  |
| 11231_164     | Zagi   | 49.1     | 7.6                        | 3027.5  | 2.2  | 1347 | 56.59                                      | 3.58         | 0.5111      | 0.0563       | 0.0557     | 1.1301     | 0.0758     | 0.0177     | 0.0012       | 0.0011     | 0.94  | 0.00183    | 0.00003 | 4273.8      | 161.2      | 767.8       | 36.1       |            |  |
| 11231_165     | Zagi   | 49.1     | 7.2                        | 3433.9  | 2.5  | 1364 | 56.07                                      | 3.53         | 0.5139      | 0.0481       | 0.0475     | 1.1764     | 0.0791     | 0.0178     | 0.0012       | 0.0011     | 0.94  | 0.00185    | 0.00004 | 4283.3      | 137.2      | 789.7       | 36.9       |            |  |

| Analysis date | Sample | U-Pb age | Concentration <sup>a</sup> |        |      | Th/U | Data for Tera-Wasserburg plot <sup>b</sup> |              |        |              |            |        |            |        |              | rho    | 208Pb/232Th |         | 207Pb/206Pb |          | 207Pb/235U |          |            |  |
|---------------|--------|----------|----------------------------|--------|------|------|--------------------------------------------|--------------|--------|--------------|------------|--------|------------|--------|--------------|--------|-------------|---------|-------------|----------|------------|----------|------------|--|
|               |        |          | Pb                         | Th     | U    |      | 238U/206Pb                                 |              |        | 207Pb/206Pb  |            |        | 207Pb/235U |        | 206Pb/238U   |        |             | Ratio   | 2 $\sigma$  | Age (Ma) | 2 $\sigma$ | Age (Ma) | 2 $\sigma$ |  |
|               |        |          |                            |        |      |      | Ratio                                      | 2 $\sigma^*$ | Ratio  | 2 $\sigma^*$ | 2 $\sigma$ | Ratio  | 2 $\sigma$ | Ratio  | 2 $\sigma^*$ |        | 2 $\sigma$  |         |             |          |            |          |            |  |
| 11231_166     | Zagi   | 49.1     | 8.2                        | 3767.7 | 2.6  | 1431 | 52.01                                      | 2.73         | 0.4963 | 0.0526       | 0.0521     | 1.2567 | 0.0861     | 0.0192 | 0.0010       | 0.0010 | 0.77        | 0.00185 | 0.00003     | 4230.6   | 155.5      | 826.4    | 38.7       |  |
| 11231_167     | Zagi   | 49.1     | 8.4                        | 4171.7 | 3.0  | 1402 | 55.93                                      | 2.99         | 0.4715 | 0.0431       | 0.0424     | 1.1677 | 0.0797     | 0.0179 | 0.0010       | 0.0010 | 0.78        | 0.00183 | 0.00004     | 4154.6   | 134.6      | 785.6    | 37.3       |  |
| 11231_170     | Zagi   | 49.1     | 10.2                       | 5164.8 | 3.3  | 1543 | 49.48                                      | 2.81         | 0.5239 | 0.0637       | 0.0632     | 1.3013 | 0.0770     | 0.0202 | 0.0012       | 0.0011 | 0.96        | 0.00180 | 0.00003     | 4310.2   | 178.2      | 846.3    | 34.0       |  |
| 11231_136     | Zagi   | 49.1     | 7.7                        | 5480.6 | 3.6  | 1503 | 53.46                                      | 3.47         | 0.4069 | 0.0499       | 0.0495     | 1.0335 | 0.0924     | 0.0187 | 0.0012       | 0.0012 | 0.73        | 0.00174 | 0.00004     | 3934.9   | 183.6      | 720.7    | 46.1       |  |
| 11231_137     | Zagi   | 49.1     | 12.4                       | 8351.3 | 5.6  | 1490 | 58.39                                      | 3.88         | 0.5230 | 0.0503       | 0.0497     | 1.1764 | 0.0805     | 0.0171 | 0.0012       | 0.0011 | 0.97        | 0.00184 | 0.00004     | 4307.4   | 140.1      | 789.6    | 37.5       |  |
| 11231_144     | Zagi   | 49.1     | 9.3                        | 5009.6 | 3.5  | 1426 | 57.30                                      | 3.29         | 0.5741 | 0.0695       | 0.0690     | 1.2460 | 0.0910     | 0.0175 | 0.0010       | 0.0010 | 0.79        | 0.00179 | 0.00003     | 4443.8   | 176.0      | 821.6    | 41.1       |  |
| 11231_150     | Zagi   | 49.1     | 6.7                        | 2660.0 | 2.1  | 1243 | 58.98                                      | 4.43         | 0.5324 | 0.0596       | 0.0591     | 1.0980 | 0.0767     | 0.0170 | 0.0013       | 0.0013 | 1.08        | 0.00184 | 0.00003     | 4344.5   | 163.6      | 752.4    | 37.1       |  |
| 11231_159     | Zagi   | 49.1     | 6.2                        | 1307.3 | 1.2  | 1094 | 54.11                                      | 3.28         | 0.5634 | 0.0542       | 0.0535     | 1.3475 | 0.0800     | 0.0185 | 0.0012       | 0.0011 | 1.02        | 0.00188 | 0.00003     | 4416.3   | 139.9      | 866.5    | 34.6       |  |
| 11231_160     | Zagi   | 49.1     | 5.0                        | 1514.9 | 1.3  | 1157 | 60.99                                      | 3.98         | 0.5659 | 0.0625       | 0.0620     | 1.1504 | 0.0891     | 0.0164 | 0.0011       | 0.0011 | 0.84        | 0.00183 | 0.00004     | 4423.1   | 160.5      | 777.4    | 42.1       |  |
| 11231_163     | Zagi   | 49.1     | 6.4                        | 2685.7 | 2.1  | 1300 | 55.69                                      | 3.53         | 0.5304 | 0.0563       | 0.0558     | 1.2168 | 0.0670     | 0.0180 | 0.0012       | 0.0011 | 1.15        | 0.00186 | 0.00004     | 4328.1   | 154.8      | 808.3    | 30.7       |  |
| 11231_168     | Zagi   | 49.1     | 8.6                        | 4555.8 | 2.9  | 1582 | 51.88                                      | 2.66         | 0.5473 | 0.0513       | 0.0506     | 1.4520 | 0.0991     | 0.0193 | 0.0010       | 0.0010 | 0.75        | 0.00187 | 0.00004     | 4373.9   | 135.9      | 910.7    | 41.1       |  |
| 11231_169     | Zagi   | 49.1     | 9.5                        | 4879.1 | 3.0  | 1616 | 50.20                                      | 2.75         | 0.6111 | 0.0768       | 0.0762     | 1.5513 | 0.1037     | 0.0199 | 0.0011       | 0.0011 | 0.82        | 0.00185 | 0.00003     | 4534.9   | 182.1      | 951.0    | 41.3       |  |
| 11231_171     | Zagi   | 49.1     | 9.4                        | 5627.7 | 3.9  | 1446 | 61.86                                      | 3.85         | 0.5205 | 0.0601       | 0.0596     | 1.0710 | 0.0749     | 0.0162 | 0.0010       | 0.0010 | 0.89        | 0.00179 | 0.00003     | 4301.9   | 169.1      | 739.2    | 36.7       |  |
| 11231_100     | Tribal | 43.0     | 10.3                       | 6194.0 | 12.0 | 518  | 91.71                                      | 5.10         | 0.2771 | 0.0383       | 0.0380     | 0.3955 | 0.0408     | 0.0109 | 0.0006       | 0.0006 | 0.54        | 0.00203 | 0.00004     | 3346.6   | 216.4      | 338.4    | 29.7       |  |
| 11231_101     | Tribal | 43.0     | 10.5                       | 6117.1 | 11.8 | 517  | 88.07                                      | 5.30         | 0.3723 | 0.0454       | 0.0450     | 0.5843 | 0.0535     | 0.0114 | 0.0007       | 0.0007 | 0.66        | 0.00209 | 0.00004     | 3800.6   | 183.5      | 467.2    | 34.3       |  |
| 11231_102     | Tribal | 43.0     | 10.0                       | 5907.1 | 11.5 | 512  | 91.97                                      | 6.22         | 0.3592 | 0.0478       | 0.0475     | 0.5052 | 0.0476     | 0.0109 | 0.0008       | 0.0007 | 0.72        | 0.00207 | 0.00004     | 3746.6   | 202.5      | 415.2    | 32.1       |  |
| 11231_103     | Tribal | 43.0     | 9.9                        | 5866.2 | 11.5 | 512  | 77.01                                      | 6.07         | 0.3973 | 0.0488       | 0.0485     | 0.7110 | 0.0975     | 0.0130 | 0.0010       | 0.0010 | 0.58        | 0.00204 | 0.00004     | 3899.1   | 184.6      | 545.3    | 57.9       |  |
| 11231_104     | Tribal | 43.0     | 10.2                       | 5926.8 | 13.5 | 440  | 84.90                                      | 5.27         | 0.4122 | 0.0479       | 0.0475     | 0.6385 | 0.0714     | 0.0118 | 0.0008       | 0.0007 | 0.55        | 0.00208 | 0.00004     | 3954.2   | 173.8      | 501.4    | 44.3       |  |
| 11231_105     | Tribal | 43.0     | 9.8                        | 5818.9 | 13.0 | 446  | 67.06                                      | 7.14         | 0.4652 | 0.0513       | 0.0509     | 0.9590 | 0.1587     | 0.0149 | 0.0016       | 0.0016 | 0.64        | 0.00205 | 0.00004     | 4134.4   | 162.8      | 682.8    | 82.3       |  |
| 11231_106     | Tribal | 43.0     | 10.1                       | 5897.3 | 13.1 | 451  | 86.96                                      | 4.83         | 0.4291 | 0.0441       | 0.0436     | 0.6767 | 0.0521     | 0.0115 | 0.0007       | 0.0006 | 0.72        | 0.00209 | 0.00004     | 4014.5   | 152.5      | 524.8    | 31.6       |  |
| 11231_107     | Tribal | 43.0     | 9.6                        | 5640.1 | 13.5 | 419  | 89.21                                      | 6.59         | 0.3501 | 0.0426       | 0.0423     | 0.5254 | 0.0626     | 0.0112 | 0.0008       | 0.0008 | 0.62        | 0.00204 | 0.00004     | 3707.3   | 185.1      | 428.7    | 41.6       |  |
| 11231_108     | Tribal | 43.0     | 9.5                        | 5574.8 | 13.3 | 420  | 98.29                                      | 6.63         | 0.3598 | 0.0391       | 0.0387     | 0.5024 | 0.0462     | 0.0102 | 0.0007       | 0.0007 | 0.73        | 0.00208 | 0.00004     | 3749.1   | 164.2      | 413.4    | 31.2       |  |
| 11231_115     | Tribal | 43.0     | 9.3                        | 5533.1 | 13.3 | 417  | 94.51                                      | 5.53         | 0.3509 | 0.0401       | 0.0398     | 0.4806 | 0.0429     | 0.0106 | 0.0006       | 0.0006 | 0.66        | 0.00206 | 0.00004     | 3711.0   | 173.5      | 398.5    | 29.4       |  |
| 11231_116     | Tribal | 43.0     | 9.1                        | 5373.0 | 13.0 | 414  | 95.19                                      | 5.80         | 0.3108 | 0.0447       | 0.0445     | 0.4344 | 0.0458     | 0.0105 | 0.0007       | 0.0006 | 0.58        | 0.00211 | 0.00004     | 3525.0   | 223.6      | 366.3    | 32.4       |  |
| 11231_117     | Tribal | 43.0     | 8.8                        | 5248.1 | 12.8 | 411  | 87.68                                      | 4.71         | 0.3306 | 0.0377       | 0.0373     | 0.5292 | 0.0524     | 0.0114 | 0.0006       | 0.0006 | 0.54        | 0.00205 | 0.00004     | 3620.1   | 174.1      | 431.3    | 34.8       |  |
| 11231_118     | Tribal | 43.0     | 9.1                        | 5407.4 | 13.1 | 414  | 92.49                                      | 5.95         | 0.3676 | 0.0405       | 0.0401     | 0.5509 | 0.0648     | 0.0108 | 0.0007       | 0.0007 | 0.55        | 0.00209 | 0.00004     | 3781.4   | 166.2      | 445.6    | 42.4       |  |
| 11231_119     | Tribal | 43.0     | 9.0                        | 5444.6 | 12.7 | 430  | 94.38                                      | 5.92         | 0.3372 | 0.0356       | 0.0352     | 0.4881 | 0.0469     | 0.0106 | 0.0007       | 0.0007 | 0.65        | 0.00201 | 0.00004     | 3650.3   | 160.3      | 403.6    | 32.0       |  |



| Analysis date | Sample | U-Pb<br>age | Concentration <sup>a</sup> |         |       | Th/U | Data for Tera-Wasserburg plot <sup>b</sup> |      |             |        |        |            |        |            |          |        |          |         | rho     | 208Pb/232Th |       | 207Pb/206Pb |      | 207Pb/235U |  |
|---------------|--------|-------------|----------------------------|---------|-------|------|--------------------------------------------|------|-------------|--------|--------|------------|--------|------------|----------|--------|----------|---------|---------|-------------|-------|-------------|------|------------|--|
|               |        |             | Pb                         | Th      | U     |      | 238U/206Pb                                 |      | 207Pb/206Pb |        |        | 207Pb/235U |        | 206Pb/238U |          |        | Ratio    | 2 σ     |         | Age<br>(Ma) | 2 σ   | Age (Ma)    | 2 σ  |            |  |
|               |        |             |                            |         |       |      | Ratio                                      | 2 σ* | Ratio       | 2 σ*   | 2 σ    | Ratio      | 2 σ    | Ratio      | 2 σ*     | 2 σ    |          |         |         |             |       |             |      |            |  |
|               |        |             |                            |         |       |      |                                            |      |             |        |        |            |        |            |          |        |          |         |         |             |       |             |      | ppm        |  |
| Ma            |        |             | Ratio                      | 2 σ     | Ratio | 2 σ  | Ratio                                      | 2 σ  | Ratio       | 2 σ    | Ratio  | 2 σ        | Ratio  | 2 σ        | Age (Ma) | 2 σ    | Age (Ma) | 2 σ     |         |             |       |             |      |            |  |
| 11231_120     | Tribal | 43.0        | 8.6                        | 5129.6  | 12.1  | 424  | 87.10                                      | 6.73 | 0.4038      | 0.0497 | 0.0494 | 0.6691     | 0.0913 | 0.0115     | 0.0009   | 0.0009 | 0.57     | 0.00206 | 0.00004 | 3923.2      | 183.9 | 520.2       | 55.6 |            |  |
| 11231_121     | Tribal | 43.0        | 9.1                        | 5472.9  | 12.8  | 427  | 91.63                                      | 5.29 | 0.3378      | 0.0359 | 0.0356 | 0.4818     | 0.0463 | 0.0109     | 0.0007   | 0.0006 | 0.60     | 0.00206 | 0.00004 | 3652.8      | 161.0 | 399.3       | 31.8 |            |  |
| 11231_122     | Tribal | 43.0        | 9.0                        | 5530.0  | 13.2  | 419  | 86.78                                      | 6.01 | 0.3714      | 0.0524 | 0.0521 | 0.5591     | 0.0559 | 0.0115     | 0.0008   | 0.0008 | 0.69     | 0.00202 | 0.00004 | 3797.2      | 214.0 | 450.9       | 36.4 |            |  |
| 11231_123     | Tribal | 43.0        | 9.1                        | 5561.0  | 13.2  | 423  | 97.03                                      | 6.26 | 0.3010      | 0.0373 | 0.0370 | 0.3957     | 0.0370 | 0.0103     | 0.0007   | 0.0007 | 0.69     | 0.00201 | 0.00004 | 3475.6      | 190.9 | 338.5       | 26.9 |            |  |
| 11231_124     | Tribal | 43.0        | 8.9                        | 5327.0  | 12.9  | 413  | 94.47                                      | 5.53 | 0.3461      | 0.0418 | 0.0415 | 0.4815     | 0.0442 | 0.0106     | 0.0006   | 0.0006 | 0.64     | 0.00209 | 0.00004 | 3689.8      | 183.6 | 399.1       | 30.3 |            |  |
| 11231_125     | Tribal | 43.0        | 8.4                        | 5195.6  | 12.4  | 420  | 91.68                                      | 6.08 | 0.3567      | 0.0411 | 0.0408 | 0.5015     | 0.0492 | 0.0109     | 0.0007   | 0.0007 | 0.68     | 0.00200 | 0.00005 | 3736.1      | 174.7 | 412.7       | 33.3 |            |  |
| 11231_126     | Tribal | 43.0        | 8.8                        | 5320.0  | 12.7  | 420  | 90.96                                      | 6.22 | 0.3334      | 0.0421 | 0.0418 | 0.4641     | 0.0419 | 0.0110     | 0.0008   | 0.0008 | 0.76     | 0.00202 | 0.00005 | 3632.7      | 192.3 | 387.1       | 29.1 |            |  |
| 11231_127     | Tribal | 43.0        | 8.8                        | 5193.9  | 12.4  | 419  | 77.40                                      | 5.57 | 0.4561      | 0.0463 | 0.0458 | 0.8260     | 0.0956 | 0.0129     | 0.0010   | 0.0009 | 0.62     | 0.00210 | 0.00004 | 4105.3      | 149.8 | 611.4       | 53.2 |            |  |
| 11231_128     | Tribal | 43.0        | 8.8                        | 5241.5  | 13.9  | 377  | 86.81                                      | 6.05 | 0.4122      | 0.0466 | 0.0462 | 0.6350     | 0.0719 | 0.0115     | 0.0008   | 0.0008 | 0.62     | 0.00207 | 0.00004 | 3954.3      | 168.9 | 499.2       | 44.6 |            |  |
| 11231_129     | Tribal | 43.0        | 8.6                        | 5223.8  | 13.9  | 375  | 93.89                                      | 4.98 | 0.3629      | 0.0387 | 0.0383 | 0.5154     | 0.0486 | 0.0107     | 0.0006   | 0.0006 | 0.56     | 0.00207 | 0.00005 | 3762.0      | 160.9 | 422.1       | 32.6 |            |  |
| 11231A94      | Tribal | 43.0        | 5.5                        | 3037.4  | 10.1  | 300  | 61.41                                      | 4.43 | 0.4731      | 0.0495 | 0.0490 | 0.9860     | 0.1028 | 0.0163     | 0.0012   | 0.0012 | 0.69     | 0.00213 | 0.00005 | 4159.6      | 153.8 | 696.7       | 52.6 |            |  |
| 11231A95      | Tribal | 43.0        | 10.4                       | 6102.1  | 12.4  | 490  | 66.37                                      | 5.55 | 0.4746      | 0.0486 | 0.0481 | 0.9824     | 0.1329 | 0.0151     | 0.0013   | 0.0013 | 0.62     | 0.00206 | 0.00005 | 4164.5      | 150.5 | 694.8       | 68.1 |            |  |
| 11231A96      | Tribal | 43.0        | 10.3                       | 6061.1  | 11.9  | 508  | 84.76                                      | 5.87 | 0.3892      | 0.0481 | 0.0477 | 0.6367     | 0.0949 | 0.0118     | 0.0008   | 0.0008 | 0.46     | 0.00204 | 0.00004 | 3867.8      | 185.8 | 500.3       | 58.9 |            |  |
| 11231A97      | Tribal | 43.0        | 10.5                       | 6099.6  | 12.3  | 495  | 81.94                                      | 5.54 | 0.3749      | 0.0443 | 0.0440 | 0.6091     | 0.0555 | 0.0122     | 0.0008   | 0.0008 | 0.74     | 0.00207 | 0.00005 | 3813.0      | 183.8 | 483.0       | 35.0 |            |  |
| 11231A98      | Tribal | 43.0        | 10.2                       | 6048.8  | 11.8  | 514  | 92.31                                      | 6.18 | 0.3970      | 0.0584 | 0.0581 | 0.5687     | 0.0626 | 0.0108     | 0.0007   | 0.0007 | 0.61     | 0.00205 | 0.00004 | 3897.8      | 222.2 | 457.2       | 40.5 |            |  |
| 11231A99      | Tribal | 43.0        | 10.5                       | 6109.9  | 11.8  | 516  | 84.28                                      | 5.28 | 0.3696      | 0.0408 | 0.0404 | 0.5649     | 0.0504 | 0.0119     | 0.0008   | 0.0007 | 0.70     | 0.00210 | 0.00004 | 3789.8      | 166.7 | 454.7       | 32.7 |            |  |
| 24µm3J5Hz3N2  |        |             |                            |         |       |      |                                            |      |             |        |        |            |        |            |          |        |          |         |         |             |       |             |      |            |  |
| 20102a34      | TPZ    | 428.5       | 79.2                       | 4795.4  | 35.1  | 137  | 14.23                                      | 0.44 | 0.0719      | 0.0048 | 0.0047 | 0.6977     | 0.0513 | 0.0703     | 0.0024   | 0.0022 | 0.42     | 0.0203  | 0.0006  | 983.3       | 134.1 | 537.4       | 30.7 |            |  |
| 20102a11      | TPZ    | 428.5       | 159.6                      | 9196.1  | 91.4  | 101  | 14.07                                      | 0.30 | 0.1118      | 0.0045 | 0.0041 | 1.0978     | 0.0479 | 0.0711     | 0.0019   | 0.0015 | 0.48     | 0.0206  | 0.0005  | 1828.7      | 66.5  | 752.3       | 23.2 |            |  |
| 20102a58      | TPZ    | 428.5       | 121.0                      | 6852.1  | 55.9  | 123  | 13.66                                      | 0.34 | 0.1208      | 0.0069 | 0.0067 | 1.2250     | 0.0817 | 0.0732     | 0.0021   | 0.0018 | 0.37     | 0.0210  | 0.0004  | 1968.5      | 99.8  | 812.1       | 37.3 |            |  |
| 20102a9       | TPZ    | 428.5       | 233.2                      | 13227.8 | 141.8 | 93   | 14.26                                      | 0.24 | 0.0809      | 0.0036 | 0.0034 | 0.7789     | 0.0305 | 0.0701     | 0.0016   | 0.0012 | 0.42     | 0.0210  | 0.0004  | 1220.4      | 77.3  | 584.8       | 17.4 |            |  |
| 20102a13      | TPZ    | 428.5       | 93.9                       | 5172.3  | 84.6  | 61   | 13.92                                      | 0.30 | 0.0906      | 0.0101 | 0.0100 | 0.9205     | 0.1168 | 0.0718     | 0.0019   | 0.0016 | 0.17     | 0.0213  | 0.0004  | 1439.2      | 211.6 | 662.6       | 61.8 |            |  |
| 20102a47      | TPZ    | 428.5       | 147.6                      | 8558.7  | 70.3  | 122  | 14.07                                      | 0.29 | 0.0762      | 0.0035 | 0.0033 | 0.7437     | 0.0316 | 0.0711     | 0.0018   | 0.0014 | 0.48     | 0.0213  | 0.0004  | 1101.9      | 86.0  | 564.6       | 18.4 |            |  |
| 20102a69      | TPZ    | 428.5       | 116.6                      | 6745.5  | 26.0  | 260  | 12.29                                      | 0.41 | 0.1759      | 0.0085 | 0.0081 | 1.9601     | 0.0988 | 0.0814     | 0.0030   | 0.0027 | 0.66     | 0.0214  | 0.0004  | 2614.5      | 82.3  | 1101.9      | 33.9 |            |  |
| 20102a33      | TPZ    | 428.5       | 129.7                      | 7566.3  | 36.1  | 210  | 13.90                                      | 0.29 | 0.0836      | 0.0044 | 0.0042 | 0.8230     | 0.0392 | 0.0720     | 0.0019   | 0.0015 | 0.44     | 0.0216  | 0.0004  | 1283.6      | 102.8 | 609.7       | 21.8 |            |  |
| 20102a57      | TPZ    | 428.5       | 148.8                      | 8324.2  | 84.0  | 99   | 13.91                                      | 0.22 | 0.0894      | 0.0047 | 0.0044 | 0.8842     | 0.0445 | 0.0719     | 0.0016   | 0.0012 | 0.32     | 0.0217  | 0.0004  | 1413.0      | 95.8  | 643.2       | 24.0 |            |  |
| 20102a8       | TPZ    | 428.5       | 265.7                      | 14850.7 | 176.9 | 84   | 14.12                                      | 0.24 | 0.0860      | 0.0026 | 0.0022 | 0.8399     | 0.0236 | 0.0708     | 0.0016   | 0.0012 | 0.61     | 0.0218  | 0.0004  | 1338.9      | 49.7  | 619.1       | 13.0 |            |  |
| 20102a70      | TPZ    | 428.5       | 99.2                       | 5586.5  | 37.8  | 148  | 13.83                                      | 0.34 | 0.0884      | 0.0049 | 0.0047 | 0.8736     | 0.0435 | 0.0723     | 0.0021   | 0.0018 | 0.49     | 0.0219  | 0.0005  | 1392.3      | 102.0 | 637.5       | 23.6 |            |  |
| 20102a71      | TPZ    | 428.5       | 217.6                      | 12057.5 | 75.8  | 159  | 14.09                                      | 0.27 | 0.0747      | 0.0031 | 0.0028 | 0.7277     | 0.0255 | 0.0710     | 0.0017   | 0.0013 | 0.54     | 0.0220  | 0.0004  | 1061.1      | 80.6  | 555.2       | 15.0 |            |  |

| Analysis date | Sample | U-Pb age | Concentration <sup>a</sup> |         |       | Th/U | Data for Tera-Wasserburg plot <sup>b</sup> |       |             |        |        |            |        |            |        |        | rho  | 208Pb/232Th |         | 207Pb/206Pb |       | 207Pb/235U |       |
|---------------|--------|----------|----------------------------|---------|-------|------|--------------------------------------------|-------|-------------|--------|--------|------------|--------|------------|--------|--------|------|-------------|---------|-------------|-------|------------|-------|
|               |        |          | Ma                         | ppm     |       |      | 238U/206Pb                                 |       | 207Pb/206Pb |        |        | 207Pb/235U |        | 206Pb/238U |        |        |      | Ratio       | 2 σ     | Age (Ma)    | 2 σ   | Age (Ma)   | 2 σ   |
|               |        |          |                            | Pb      | Th    |      | U                                          | Ratio | 2 σ*        | Ratio  | 2 σ*   | 2 σ        | Ratio  | 2 σ        | Ratio  | 2 σ*   |      |             |         |             |       |            |       |
| 20102a46      | TPZ    | 428.5    | 70.1                       | 3786.2  | 67.0  | 57   | 13.91                                      | 0.24  | 0.0740      | 0.0031 | 0.0029 | 0.7297     | 0.0256 | 0.0719     | 0.0016 | 0.0012 | 0.49 | 0.0225      | 0.0004  | 1042.6      | 79.6  | 556.4      | 15.0  |
| 20111A41      | TPZ    | 409.6    | 132.2                      | 7425.0  | 13.8  | 538  | 13.32                                      | 0.51  | 0.1267      | 0.0096 | 0.0094 | 1.2901     | 0.0738 | 0.0751     | 0.0031 | 0.0029 | 0.67 | 0.01248     | 0.00027 | 2053.7      | 137.2 | 841.4      | 32.7  |
| 20111A42      | TPZ    | 409.6    | 167.3                      | 9567.9  | 16.1  | 596  | 14.63                                      | 0.54  | 0.0795      | 0.0072 | 0.0071 | 0.7315     | 0.0612 | 0.0684     | 0.0028 | 0.0025 | 0.45 | 0.01566     | 0.00041 | 1184.9      | 177.8 | 557.5      | 35.9  |
| 20111A33      | TPZ    | 409.6    | 5.4                        | 817.6   | 0.5   | 1548 | 2.06                                       | 0.32  | 0.7573      | 0.0789 | 0.0781 | 47.861     | 8.7895 | 0.4857     | 0.0749 | 0.0745 | 0.84 | 0.01716     | 0.00028 | error       |       | 3948.8     | 182.7 |
| 20111A34      | TPZ    | 409.6    | 127.3                      | 7646.3  | 19.5  | 393  | 14.47                                      | 0.49  | 0.0849      | 0.0065 | 0.0064 | 0.8206     | 0.0548 | 0.0691     | 0.0026 | 0.0023 | 0.50 | 0.01673     | 0.00033 | 1322.2      | 146.3 | 608.4      | 30.6  |
| 20111A35      | TPZ    | 409.6    | 94.3                       | 5725.2  | 18.7  | 306  | 15.53                                      | 0.52  | 0.0591      | 0.0053 | 0.0052 | 0.5227     | 0.0447 | 0.0644     | 0.0024 | 0.0022 | 0.39 | 0.01708     | 0.00034 | 568.6       | 192.6 | 426.9      | 29.8  |
| 20111A32      | TPZ    | 409.6    | 72.5                       | 3960.6  | 73.0  | 54   | 14.73                                      | 0.35  | 0.0750      | 0.0037 | 0.0036 | 0.7277     | 0.0319 | 0.0679     | 0.0019 | 0.0016 | 0.54 | 0.01813     | 0.00034 | 1133.3      | 95.5  | 555.2      | 18.7  |
| 20111A11      | TPZ    | 409.6    | 221.2                      | 17498.3 | 29.9  | 584  | 7.79                                       | 0.48  | 0.4509      | 0.0199 | 0.0187 | 8.0851     | 0.5670 | 0.1284     | 0.0082 | 0.0080 | 0.88 | 0.01874     | 0.00037 | 4088.1      | 61.8  | 2240.6     | 63.4  |
| 20111A31      | TPZ    | 409.6    | 133.7                      | 7546.4  | 58.9  | 128  | 15.23                                      | 0.40  | 0.0738      | 0.0039 | 0.0037 | 0.6867     | 0.0305 | 0.0657     | 0.0020 | 0.0017 | 0.59 | 0.01868     | 0.00035 | 1035.2      | 106.5 | 530.8      | 18.4  |
| 20111A13      | TPZ    | 409.6    | 188.5                      | 11926.8 | 102.7 | 116  | 9.84                                       | 0.43  | 0.3665      | 0.0193 | 0.0185 | 5.3955     | 0.4725 | 0.1017     | 0.0047 | 0.0044 | 0.50 | 0.02008     | 0.00038 | 3777.0      | 76.5  | 1884.1     | 75.0  |
| 20111A18      | TPZ    | 409.6    | 123.2                      | 7501.8  | 39.4  | 190  | 13.59                                      | 0.37  | 0.1505      | 0.0113 | 0.0111 | 1.5366     | 0.1153 | 0.0736     | 0.0023 | 0.0020 | 0.36 | 0.01981     | 0.00034 | 2353.7      | 125.9 | 945.1      | 46.1  |
| 20111A8       | TPZ    | 409.6    | 87.5                       | 5509.0  | 63.1  | 87   | 14.33                                      | 0.45  | 0.1205      | 0.0120 | 0.0118 | 1.1791     | 0.1392 | 0.0698     | 0.0024 | 0.0022 | 0.26 | 0.02035     | 0.00047 | 1964.8      | 175.6 | 790.9      | 64.9  |
| 20111A12      | TPZ    | 409.6    | 134.0                      | 9991.6  | 45.8  | 218  | 10.90                                      | 0.42  | 0.2695      | 0.0122 | 0.0115 | 3.4778     | 0.2507 | 0.0917     | 0.0038 | 0.0036 | 0.54 | 0.02059     | 0.00034 | 3303.4      | 66.7  | 1522.2     | 56.9  |
| 20111A16      | TPZ    | 409.6    | 300.3                      | 17818.1 | 70.2  | 254  | 14.59                                      | 0.31  | 0.0742      | 0.0037 | 0.0036 | 0.7094     | 0.0274 | 0.0686     | 0.0018 | 0.0015 | 0.56 | 0.02096     | 0.00039 | 1055.6      | 96.3  | 544.4      | 16.3  |
| 20111A21      | TPZ    | 409.6    | 68.4                       | 3970.3  | 47.5  | 84   | 14.62                                      | 0.37  | 0.1075      | 0.0070 | 0.0068 | 1.0282     | 0.0623 | 0.0684     | 0.0020 | 0.0017 | 0.41 | 0.02154     | 0.00041 | 1757.7      | 114.7 | 718.0      | 31.2  |
| 20111A40      | TPZ    | 409.6    | 168.1                      | 11985.8 | 18.6  | 643  | 7.88                                       | 0.60  | 0.4461      | 0.0313 | 0.0305 | 8.6863     | 1.0395 | 0.1268     | 0.0099 | 0.0097 | 0.64 | 0.02415     | 0.00049 | 4072.2      | 102.9 | 2305.6     | 109.0 |
| 20111A48      | MNP    | 37.8     | 7.3                        | 6721.7  | 9.4   | 712  | 99.84                                      | 8.03  | 0.4726      | 0.0885 | 0.0882 | 0.5219     | 0.0651 | 0.0100     | 0.0008 | 0.0008 | 0.65 | 0.00142     | 0.00003 | 4158.3      | 280.2 | 426.4      | 43.4  |
| 20111A49      | MNP    | 37.8     | 10.1                       | 7636.2  | 13.0  | 589  | 29.10                                      | 7.57  | 0.6057      | 0.0963 | 0.0959 | 3.3742     | 1.0034 | 0.0344     | 0.0090 | 0.0089 | 0.87 | 0.00155     | 0.00004 | 4521.9      | 252.2 | 1498.4     | 232.9 |
| 20111A50      | MNP    | 37.8     | 11.3                       | 10083.0 | 26.3  | 383  | 128.06                                     | 8.01  | 0.3096      | 0.0378 | 0.0375 | 0.2943     | 0.0243 | 0.0078     | 0.0005 | 0.0005 | 0.76 | 0.00166     | 0.00004 | 3519.1      | 187.0 | 261.9      | 19.1  |
| 20111A52      | MNP    | 37.8     | 8.9                        | 7798.0  | 13.4  | 584  | 105.07                                     | 7.65  | 0.3186      | 0.0528 | 0.0526 | 0.3679     | 0.0385 | 0.0095     | 0.0007 | 0.0007 | 0.70 | 0.00136     | 0.00003 | 3564.8      | 256.6 | 318.1      | 28.6  |
| 20111A54      | MNP    | 37.8     | 8.7                        | 7563.9  | 11.3  | 670  | 94.66                                      | 7.44  | 0.3697      | 0.0506 | 0.0502 | 0.4959     | 0.0532 | 0.0106     | 0.0008 | 0.0008 | 0.73 | 0.00136     | 0.00003 | 3790.1      | 206.7 | 408.9      | 36.1  |
| 20111A55      | MNP    | 37.8     | 9.1                        | 7147.2  | 12.4  | 577  | 32.48                                      | 5.89  | 0.6105      | 0.0567 | 0.0559 | 3.1513     | 0.6930 | 0.0308     | 0.0056 | 0.0056 | 0.82 | 0.00150     | 0.00006 | 4533.2      | 133.2 | 1445.3     | 169.5 |
| 20111A56      | MNP    | 37.8     | 9.4                        | 8292.3  | 13.6  | 610  | 106.89                                     | 7.85  | 0.3667      | 0.0457 | 0.0454 | 0.4182     | 0.0362 | 0.0094     | 0.0007 | 0.0007 | 0.85 | 0.00136     | 0.00003 | 3788.9      | 188.9 | 354.8      | 25.9  |
| 20111A57      | MNP    | 37.8     | 10.1                       | 8900.2  | 14.4  | 619  | 102.81                                     | 6.96  | 0.4028      | 0.0639 | 0.0636 | 0.4777     | 0.0476 | 0.0097     | 0.0007 | 0.0007 | 0.68 | 0.00141     | 0.00003 | 3919.5      | 238.6 | 396.5      | 32.7  |
| 20111A58      | MNP    | 37.8     | 8.7                        | 7517.5  | 11.6  | 647  | 97.67                                      | 7.39  | 0.4598      | 0.0973 | 0.0971 | 0.5255     | 0.0484 | 0.0102     | 0.0008 | 0.0008 | 0.82 | 0.00137     | 0.00003 | 4117.2      | 319.0 | 428.8      | 32.2  |
| 20111A60      | MNP    | 37.8     | 7.3                        | 6472.9  | 8.9   | 727  | 98.16                                      | 8.18  | 0.3961      | 0.0720 | 0.0717 | 0.4930     | 0.0639 | 0.0102     | 0.0009 | 0.0008 | 0.64 | 0.00138     | 0.00003 | 3894.8      | 276.0 | 407.0      | 43.4  |
| 20111A62      | MNP    | 37.8     | 8.0                        | 7087.7  | 9.6   | 736  | 78.99                                      | 5.83  | 0.5464      | 0.0857 | 0.0853 | 0.8288     | 0.0730 | 0.0127     | 0.0010 | 0.0009 | 0.84 | 0.00139     | 0.00003 | 4371.5      | 230.6 | 613.0      | 40.5  |
| 20111A68      | MNP    | 37.8     | 7.8                        | 6887.0  | 13.0  | 532  | 106.59                                     | 7.93  | 0.3318      | 0.0444 | 0.0442 | 0.4138     | 0.0446 | 0.0094     | 0.0007 | 0.0007 | 0.69 | 0.00138     | 0.00003 | 3625.6      | 205.2 | 351.6      | 32.0  |
| 20111A69      | MNP    | 37.8     | 8.4                        | 7409.7  | 10.2  | 730  | 109.02                                     | 7.06  | 0.3960      | 0.0592 | 0.0589 | 0.4693     | 0.0521 | 0.0092     | 0.0006 | 0.0006 | 0.58 | 0.00136     | 0.00004 | 3894.1      | 225.8 | 390.7      | 36.0  |
| 20111A71      | MNP    | 37.8     | 8.9                        | 7872.5  | 9.9   | 796  | 101.69                                     | 7.87  | 0.3266      | 0.0491 | 0.0489 | 0.4097     | 0.0477 | 0.0098     | 0.0008 | 0.0008 | 0.67 | 0.00137     | 0.00003 | 3601.5      | 231.8 | 348.7      | 34.3  |
| 20111A73      | MNP    | 37.8     | 8.4                        | 7281.7  | 13.5  | 541  | 104.68                                     | 7.10  | 0.4333      | 0.1781 | 0.1780 | 0.4115     | 0.0410 | 0.0096     | 0.0007 | 0.0006 | 0.68 | 0.00140     | 0.00004 | 4028.9      | 658.4 | 350.0      | 29.5  |
| 20111A74      | MNP    | 37.8     | 9.3                        | 8201.0  | 13.7  | 601  | 103.97                                     | 6.31  | 0.3374      | 0.0455 | 0.0452 | 0.4044     | 0.0381 | 0.0096     | 0.0006 | 0.0006 | 0.64 | 0.00137     | 0.00003 | 3650.9      | 206.7 | 344.9      | 27.5  |

| Analysis date | Sample | U-Pb age | Concentration <sup>a</sup> |        |      | Th/U | Data for Tera-Wasserburg plot <sup>b</sup> |       |             |        |            |        | rho    | 208Pb/232Th |        | 207Pb/206Pb |       | 207Pb/235U |          |          |          |          |      |
|---------------|--------|----------|----------------------------|--------|------|------|--------------------------------------------|-------|-------------|--------|------------|--------|--------|-------------|--------|-------------|-------|------------|----------|----------|----------|----------|------|
|               |        |          | Pb                         | Th     | U    |      | 238U/206Pb                                 |       | 207Pb/206Pb |        | 207Pb/235U |        |        | 206Pb/238U  |        |             | Ratio | 2 σ        | Age (Ma) | 2 σ      | Age (Ma) | 2 σ      |      |
|               |        |          | Ma                         | ppm    |      |      | Ratio                                      | 2 σ*  | Ratio       | 2 σ*   | 2 σ        | Ratio  |        | 2 σ         | Ratio  | 2 σ*        | 2 σ   | Ratio      | 2 σ      | Age (Ma) | 2 σ      | Age (Ma) | 2 σ  |
| 20111A75      | MNP    | 37.8     | 9.9                        | 8834.5 | 14.0 | 629  | 102.46                                     | 6.67  | 0.3328      | 0.0480 | 0.0477     | 0.3884 | 0.0373 | 0.0098      | 0.0007 | 0.0006      | 0.68  | 0.00138    | 0.00003  | 3631.5   | 221.4    | 333.2    | 27.2 |
| 20111A76      | MNP    | 37.8     | 12.0                       | 7518.8 | 10.4 | 724  | 52.94                                      | 5.88  | 0.6432      | 0.0743 | 0.0737     | 1.6221 | 0.2403 | 0.0189      | 0.0021 | 0.0021      | 0.75  | 0.00137    | 0.00004  | 4609.0   | 176.5    | 978.8    | 93.1 |
| 20111A77      | MNP    | 37.8     | 7.7                        | 6813.8 | 10.1 | 673  | 81.26                                      | 6.08  | 0.4790      | 0.0683 | 0.0679     | 0.7165 | 0.0646 | 0.0123      | 0.0009 | 0.0009      | 0.83  | 0.00135    | 0.00003  | 4177.7   | 211.2    | 548.6    | 38.2 |
| 20111A78      | MNP    | 37.8     | 10.3                       | 9267.4 | 14.4 | 644  | 111.75                                     | 7.14  | 0.3958      | 0.0724 | 0.0721     | 0.4190 | 0.0394 | 0.0089      | 0.0006 | 0.0006      | 0.68  | 0.00132    | 0.00003  | 3893.5   | 278.1    | 355.3    | 28.2 |
| 20111A79      | MNP    | 37.8     | 9.7                        | 8629.4 | 13.8 | 623  | 116.46                                     | 7.08  | 0.2717      | 0.0330 | 0.0327     | 0.3042 | 0.0349 | 0.0086      | 0.0005 | 0.0005      | 0.53  | 0.00138    | 0.00003  | 3315.7   | 190.6    | 269.7    | 27.2 |
| 20111A80      | MNP    | 37.8     | 10.8                       | 9367.6 | 15.2 | 617  | 103.06                                     | 7.05  | 0.3369      | 0.0437 | 0.0434     | 0.4155 | 0.0361 | 0.0097      | 0.0007 | 0.0007      | 0.79  | 0.00138    | 0.00003  | 3649.1   | 198.5    | 352.8    | 25.9 |
| 20111A81      | MNP    | 37.8     | 9.6                        | 8789.9 | 14.5 | 608  | 106.34                                     | 7.54  | 0.3576      | 0.0488 | 0.0485     | 0.4174 | 0.0390 | 0.0094      | 0.0007 | 0.0007      | 0.76  | 0.00137    | 0.00004  | 3739.8   | 207.7    | 354.2    | 27.9 |
| 20111A82      | MNP    | 37.8     | 9.6                        | 8607.0 | 15.2 | 567  | 114.55                                     | 6.82  | 0.3361      | 0.0537 | 0.0535     | 0.3696 | 0.0377 | 0.0087      | 0.0005 | 0.0005      | 0.58  | 0.00134    | 0.00004  | 3645.4   | 246.0    | 319.4    | 28.0 |
| 20111A51      | MNP    | 37.8     | 11.2                       | 8205.2 | 23.0 | 357  | 37.78                                      | 1.49  | 0.7376      | 0.0369 | 0.0351     | 2.6983 | 0.0981 | 0.0265      | 0.0011 | 0.0010      | 1.08  | 0.00167    | 0.00004  | error    | error    | 1328.0   | 26.9 |
| 20111A53      | MNP    | 37.8     | 10.8                       | 9296.2 | 19.3 | 481  | 139.77                                     | 10.43 | 0.3772      | 0.0626 | 0.0623     | 0.3231 | 0.0363 | 0.0072      | 0.0005 | 0.0005      | 0.66  | 0.00138    | 0.00004  | 3820.7   | 252.5    | 284.3    | 27.9 |
| 20111A59      | MNP    | 37.8     | 12.2                       | 7844.3 | 24.4 | 322  | 25.99                                      | 1.26  | 0.7874      | 0.0331 | 0.0308     | 4.1355 | 0.2151 | 0.0385      | 0.0020 | 0.0019      | 0.93  | 0.00146    | 0.00004  | error    | error    | 1661.3   | 42.6 |
| 20111A61      | MNP    | 37.8     | 12.2                       | 7651.2 | 24.3 | 315  | 24.62                                      | 0.95  | 0.7835      | 0.0380 | 0.0361     | 4.5092 | 0.1599 | 0.0406      | 0.0017 | 0.0016      | 1.09  | 0.00139    | 0.00004  | error    | error    | 1732.7   | 29.5 |
| 20111A70      | MNP    | 37.8     | 8.3                        | 7379.0 | 9.6  | 773  | 85.69                                      | 6.23  | 0.4041      | 0.0775 | 0.0772     | 0.5441 | 0.0571 | 0.0117      | 0.0009 | 0.0008      | 0.69  | 0.00138    | 0.00003  | 3924.4   | 291.3    | 441.1    | 37.6 |
| 20111A72      | MNP    | 37.8     | 8.5                        | 7377.0 | 10.7 | 689  | 66.61                                      | 5.74  | 0.5215      | 0.0551 | 0.0546     | 0.9532 | 0.0867 | 0.0150      | 0.0013 | 0.0013      | 0.95  | 0.00137    | 0.00003  | 4303.4   | 154.5    | 679.8    | 45.1 |
| 20111A88      | Tribal | 40.9     | 5.4                        | 3169.5 | 9.3  | 340  | 82.46                                      | 6.58  | 0.4928      | 0.0701 | 0.0697     | 0.7196 | 0.0647 | 0.0121      | 0.0010 | 0.0010      | 0.89  | 0.00200    | 0.00006  | 4220.1   | 210.2    | 550.4    | 38.2 |
| 20111A89      | Tribal | 40.9     | 4.9                        | 2818.8 | 9.4  | 299  | 87.63                                      | 7.30  | 0.4438      | 0.0591 | 0.0587     | 0.6134 | 0.0575 | 0.0114      | 0.0010 | 0.0010      | 0.89  | 0.00210    | 0.00006  | 4064.5   | 198.4    | 485.7    | 36.2 |
| 20111A90      | Tribal | 40.9     | 5.0                        | 2844.7 | 9.5  | 299  | 83.92                                      | 6.68  | 0.4658      | 0.0753 | 0.0750     | 0.6152 | 0.0555 | 0.0119      | 0.0010 | 0.0009      | 0.88  | 0.00203    | 0.00006  | 4136.7   | 240.3    | 486.9    | 34.9 |
| 20111A91      | Tribal | 40.9     | 4.9                        | 2758.0 | 9.6  | 288  | 84.91                                      | 6.74  | 0.4374      | 0.1321 | 0.1319     | 0.5627 | 0.0564 | 0.0118      | 0.0010 | 0.0009      | 0.79  | 0.00207    | 0.00005  | 4043.1   | 466.7    | 453.3    | 36.6 |
| 20111A92      | Tribal | 40.9     | 4.9                        | 2838.2 | 9.7  | 293  | 89.64                                      | 6.70  | 0.4273      | 0.0528 | 0.0524     | 0.5703 | 0.0499 | 0.0112      | 0.0009 | 0.0008      | 0.85  | 0.00201    | 0.00006  | 4008.3   | 183.5    | 458.2    | 32.2 |
| 20111A93      | Tribal | 40.9     | 4.8                        | 2781.4 | 10.1 | 275  | 84.98                                      | 6.09  | 0.3163      | 0.0415 | 0.0412     | 0.4718 | 0.0608 | 0.0118      | 0.0009 | 0.0008      | 0.56  | 0.00203    | 0.00006  | 3551.6   | 202.2    | 392.4    | 42.0 |
| 20111A94      | Tribal | 40.9     | 4.8                        | 2743.3 | 9.9  | 278  | 90.52                                      | 6.55  | 0.4333      | 0.0651 | 0.0648     | 0.5982 | 0.0626 | 0.0110      | 0.0008 | 0.0008      | 0.69  | 0.00205    | 0.00006  | 4029.3   | 224.9    | 476.1    | 39.8 |
| 20111A95      | Tribal | 40.9     | 4.8                        | 2715.1 | 10.0 | 270  | 87.08                                      | 6.57  | 0.4160      | 0.0661 | 0.0658     | 0.5792 | 0.0635 | 0.0115      | 0.0009 | 0.0009      | 0.69  | 0.00206    | 0.00005  | 3968.2   | 239.2    | 464.0    | 40.8 |
| 20111A96      | Tribal | 40.9     | 4.6                        | 2659.9 | 10.1 | 263  | 91.94                                      | 7.57  | 0.5333      | 0.1262 | 0.1259     | 0.6160 | 0.0611 | 0.0109      | 0.0009 | 0.0009      | 0.83  | 0.00196    | 0.00006  | 4336.1   | 353.8    | 487.4    | 38.4 |
| 20111A97      | Tribal | 40.9     | 4.7                        | 2627.5 | 10.5 | 251  | 94.77                                      | 7.65  | 0.4003      | 0.0611 | 0.0608     | 0.5255 | 0.0498 | 0.0106      | 0.0009 | 0.0009      | 0.85  | 0.00209    | 0.00006  | 3910.2   | 230.3    | 428.8    | 33.1 |
| 20111A98      | Tribal | 40.9     | 4.7                        | 2737.9 | 10.2 | 269  | 94.88                                      | 7.14  | 0.4555      | 0.0635 | 0.0631     | 0.5762 | 0.0533 | 0.0105      | 0.0008 | 0.0008      | 0.81  | 0.00198    | 0.00006  | 4103.4   | 207.2    | 462.0    | 34.4 |
| 20111A99      | Tribal | 40.9     | 4.6                        | 2626.6 | 10.4 | 253  | 86.05                                      | 6.60  | 0.3763      | 0.0561 | 0.0558     | 0.5265 | 0.0610 | 0.0116      | 0.0009 | 0.0009      | 0.66  | 0.00202    | 0.00007  | 3817.0   | 226.2    | 429.5    | 40.6 |
| 20111A122     | Tribal | 40.9     | 10.6                       | 7808.2 | 5.3  | 1461 | 84.40                                      | 7.43  | 0.0560      | 0.1614 | 0.1614     | 0.2195 | 0.0538 | 0.0118      | 0.0011 | 0.0010      | 0.36  | 0.00165    | 0.00005  | 450.0    | 2511.4   | 201.5    | 44.8 |
| 20111A100     | Tribal | 40.9     | 4.3                        | 2406.5 | 11.2 | 216  | 97.09                                      | 7.81  | 0.4153      | 0.0709 | 0.0706     | 0.4858 | 0.0447 | 0.0103      | 0.0008 | 0.0008      | 0.87  | 0.00212    | 0.00007  | 3965.4   | 257.7    | 402.0    | 30.5 |
| 20111A101     | Tribal | 40.9     | 4.2                        | 2275.4 | 13.2 | 172  | 104.87                                     | 7.44  | 0.3212      | 0.0436 | 0.0433     | 0.3841 | 0.0320 | 0.0095      | 0.0007 | 0.0007      | 0.85  | 0.00220    | 0.00009  | 3575.6   | 209.0    | 330.0    | 23.5 |
| 20111A102     | Tribal | 40.9     | 4.1                        | 2216.5 | 13.3 | 166  | 101.77                                     | 7.04  | 0.3164      | 0.0375 | 0.0372     | 0.4078 | 0.0392 | 0.0098      | 0.0007 | 0.0007      | 0.72  | 0.00216    | 0.00008  | 3552.8   | 182.4    | 347.3    | 28.3 |
| 20111A108     | Tribal | 40.9     | 9.9                        | 5779.7 | 13.0 | 443  | 94.66                                      | 5.92  | 0.3666      | 0.0477 | 0.0474     | 0.4822 | 0.0450 | 0.0106      | 0.0007 | 0.0007      | 0.67  | 0.00201    | 0.00005  | 3777.6   | 197.2    | 399.6    | 30.8 |
| 20111A109     | Tribal | 40.9     | 9.7                        | 5736.0 | 12.8 | 450  | 98.05                                      | 5.97  | 0.2613      | 0.0394 | 0.0392     | 0.3334 | 0.0389 | 0.0102      | 0.0006 | 0.0006      | 0.52  | 0.00194    | 0.00005  | 3254.6   | 238.4    | 292.1    | 29.6 |

| Analysis date | Sample | U-Pb age | Concentration <sup>a</sup> |         |       |              | Th/U   | Data for Tera-Wasserburg plot <sup>b</sup> |              |             |              |            |            |              |            |              | rho  | 208Pb/232Th |            | 207Pb/206Pb |            | 207Pb/235U |            |            |
|---------------|--------|----------|----------------------------|---------|-------|--------------|--------|--------------------------------------------|--------------|-------------|--------------|------------|------------|--------------|------------|--------------|------|-------------|------------|-------------|------------|------------|------------|------------|
|               |        |          | Ma                         | ppm     |       |              |        | 238U/206Pb                                 |              | 207Pb/206Pb |              |            | 207Pb/235U |              | 206Pb/238U |              |      | Ratio       | 2 $\sigma$ | Age (Ma)    | 2 $\sigma$ | Age (Ma)   | 2 $\sigma$ |            |
|               |        |          |                            | Pb      | Th    | U            |        | Ratio                                      | 2 $\sigma^*$ | Ratio       | 2 $\sigma^*$ | 2 $\sigma$ | Ratio      | 2 $\sigma$   | Ratio      | 2 $\sigma^*$ |      |             |            |             |            |            |            | 2 $\sigma$ |
|               |        |          |                            | U       | Ratio | 2 $\sigma^*$ |        | Ratio                                      | 2 $\sigma^*$ | 2 $\sigma$  | Ratio        | 2 $\sigma$ | Ratio      | 2 $\sigma^*$ | 2 $\sigma$ | Ratio        |      |             |            |             |            |            |            | 2 $\sigma$ |
| 20111A110     | Tribal | 40.9     | 9.8                        | 5878.6  | 12.8  | 458          | 102.32 | 7.75                                       | 0.3188       | 0.0501      | 0.0499       | 0.3623     | 0.0386     | 0.0098       | 0.0008     | 0.0007       | 0.71 | 0.00196     | 0.00005    | 3564.5      | 242.1      | 314.0      | 28.8       |            |
| 20111A111     | Tribal | 40.9     | 9.8                        | 5781.3  | 12.9  | 448          | 101.63 | 6.71                                       | 0.2919       | 0.0486      | 0.0484       | 0.3650     | 0.0400     | 0.0098       | 0.0007     | 0.0006       | 0.60 | 0.00198     | 0.00005    | 3427.5      | 260.5      | 316.0      | 29.8       |            |
| 20111A112     | Tribal | 40.9     | 10.0                       | 5748.0  | 12.8  | 448          | 96.65  | 6.41                                       | 0.3181       | 0.0470      | 0.0468       | 0.4078     | 0.0422     | 0.0103       | 0.0007     | 0.0007       | 0.64 | 0.00203     | 0.00005    | 3560.8      | 228.2      | 347.3      | 30.5       |            |
| 20111A113     | Tribal | 40.9     | 5.7                        | 3257.3  | 10.4  | 313          | 76.97  | 5.21                                       | 0.4272       | 0.0549      | 0.0545       | 0.6658     | 0.0629     | 0.0130       | 0.0009     | 0.0009       | 0.72 | 0.00204     | 0.00005    | 4007.9      | 191.7      | 518.2      | 38.4       |            |
| 20111A114     | Tribal | 40.9     | 5.1                        | 2870.9  | 9.4   | 306          | 87.44  | 6.47                                       | 0.4334       | 0.0516      | 0.0512       | 0.6353     | 0.0650     | 0.0114       | 0.0009     | 0.0008       | 0.72 | 0.00204     | 0.00006    | 4029.3      | 177.2      | 499.4      | 40.4       |            |
| 20111A115     | Tribal | 40.9     | 4.5                        | 2629.1  | 11.2  | 235          | 93.81  | 7.01                                       | 0.4300       | 0.0974      | 0.0972       | 0.5211     | 0.0531     | 0.0107       | 0.0008     | 0.0008       | 0.73 | 0.00195     | 0.00006    | 4017.6      | 344.3      | 425.9      | 35.4       |            |
| 20111A116     | Tribal | 40.9     | 4.0                        | 2059.0  | 18.7  | 110          | 114.27 | 6.40                                       | 0.2458       | 0.0275      | 0.0272       | 0.2792     | 0.0243     | 0.0088       | 0.0005     | 0.0005       | 0.64 | 0.00220     | 0.00008    | 3158.3      | 175.8      | 250.0      | 19.3       |            |
| 20111A117     | Tribal | 40.9     | 4.6                        | 2843.2  | 17.5  | 163          | 119.48 | 8.38                                       | 0.2304       | 0.0532      | 0.0531       | 0.2144     | 0.0285     | 0.0084       | 0.0006     | 0.0006       | 0.53 | 0.00187     | 0.00006    | 3054.6      | 377.0      | 197.2      | 23.8       |            |
| 20111A118     | Tribal | 40.9     | 7.3                        | 4553.1  | 13.2  | 346          | 124.33 | 9.23                                       | 0.2397       | 0.0463      | 0.0462       | 0.2334     | 0.0331     | 0.0080       | 0.0006     | 0.0006       | 0.52 | 0.00193     | 0.00004    | 3118.2      | 311.4      | 213.0      | 27.2       |            |
| 20111A119     | Tribal | 40.9     | 7.4                        | 4702.1  | 12.5  | 375          | 108.29 | 8.25                                       | 0.3081       | 0.0445      | 0.0442       | 0.3451     | 0.0359     | 0.0092       | 0.0007     | 0.0007       | 0.73 | 0.00186     | 0.00004    | 3511.6      | 223.6      | 301.1      | 27.1       |            |
| 20111A120     | Tribal | 40.9     | 7.2                        | 4718.1  | 8.0   | 591          | 103.16 | 9.35                                       | 0.1674       | 0.1684      | 0.1683       | 0.2589     | 0.0440     | 0.0097       | 0.0009     | 0.0009       | 0.53 | 0.00182     | 0.00005    | 2531.8      | 1111.7     | 233.8      | 35.5       |            |
| 20111A121     | Tribal | 40.9     | 7.9                        | 5669.9  | 4.4   | 1301         | 101.83 | 10.94                                      | 0.1837       | 0.1515      | 0.1515       | 0.2411     | 0.0683     | 0.0098       | 0.0011     | 0.0011       | 0.38 | 0.00168     | 0.00005    | 2686.1      | 954.5      | 219.4      | 55.9       |            |
| 20111A129     | Zagi   | 45.6     | 15.0                       | 10130.3 | 6.8   | 1490         | 54.27  | 4.36                                       | 0.5373       | 0.0678      | 0.0673       | 1.1651     | 0.0987     | 0.0184       | 0.0015     | 0.0015       | 0.95 | 0.00182     | 0.00004    | 4347.2      | 184.8      | 784.4      | 46.3       |            |
| 20111A130     | Zagi   | 45.6     | 14.9                       | 9934.8  | 6.5   | 1522         | 54.80  | 3.59                                       | 0.5522       | 0.0693      | 0.0687       | 1.2563     | 0.1094     | 0.0182       | 0.0012     | 0.0012       | 0.75 | 0.00180     | 0.00004    | 4386.9      | 183.0      | 826.3      | 49.2       |            |
| 20111A131     | Zagi   | 45.6     | 14.6                       | 9732.8  | 6.5   | 1491         | 55.56  | 3.84                                       | 0.4902       | 0.0490      | 0.0484       | 1.1402     | 0.0875     | 0.0180       | 0.0013     | 0.0012       | 0.90 | 0.00181     | 0.00004    | 4212.0      | 146.4      | 772.6      | 41.5       |            |
| 20111A132     | Zagi   | 45.6     | 14.2                       | 9449.0  | 6.1   | 1555         | 50.71  | 3.66                                       | 0.5230       | 0.0669      | 0.0665       | 1.2253     | 0.0937     | 0.0197       | 0.0015     | 0.0014       | 0.94 | 0.00182     | 0.00004    | 4307.3      | 188.0      | 812.2      | 42.7       |            |
| 20111A133     | Zagi   | 45.6     | 14.2                       | 9451.7  | 6.3   | 1499         | 53.29  | 4.25                                       | 0.5022       | 0.0617      | 0.0613       | 1.1472     | 0.1008     | 0.0188       | 0.0015     | 0.0015       | 0.91 | 0.00179     | 0.00004    | 4247.8      | 180.6      | 775.9      | 47.7       |            |
| 20111A134     | Zagi   | 45.6     | 14.3                       | 9528.5  | 6.4   | 1484         | 55.24  | 4.22                                       | 0.5361       | 0.0770      | 0.0765       | 1.1423     | 0.0996     | 0.0181       | 0.0014     | 0.0014       | 0.88 | 0.00181     | 0.00004    | 4343.6      | 210.9      | 773.6      | 47.2       |            |
| 20111A135     | Zagi   | 45.6     | 14.5                       | 9487.1  | 6.4   | 1474         | 54.71  | 4.22                                       | 0.4976       | 0.0554      | 0.0549       | 1.1217     | 0.0900     | 0.0183       | 0.0014     | 0.0014       | 0.96 | 0.00182     | 0.00004    | 4234.3      | 163.5      | 763.8      | 43.1       |            |
| 20111A137     | Zagi   | 45.6     | 14.6                       | 9665.3  | 6.4   | 1511         | 56.33  | 4.34                                       | 0.5382       | 0.0665      | 0.0660       | 1.2020     | 0.1079     | 0.0178       | 0.0014     | 0.0014       | 0.86 | 0.00184     | 0.00004    | 4349.7      | 180.8      | 801.5      | 49.7       |            |
| 20111A139     | Zagi   | 45.6     | 14.7                       | 9628.1  | 6.3   | 1520         | 52.22  | 3.99                                       | 0.5504       | 0.0917      | 0.0913       | 1.1968     | 0.0931     | 0.0191       | 0.0015     | 0.0015       | 0.98 | 0.00179     | 0.00004    | 4382.4      | 244.4      | 799.1      | 43.0       |            |
| 20111A141     | Zagi   | 45.6     | 14.7                       | 9726.3  | 6.4   | 1529         | 54.13  | 3.91                                       | 0.4749       | 0.0604      | 0.0600       | 1.0881     | 0.0912     | 0.0185       | 0.0014     | 0.0013       | 0.86 | 0.00184     | 0.00004    | 4165.1      | 188.1      | 747.6      | 44.3       |            |
| 20111A142     | Zagi   | 45.6     | 14.6                       | 9882.0  | 6.5   | 1517         | 57.93  | 4.47                                       | 0.5423       | 0.0724      | 0.0719       | 1.1330     | 0.0980     | 0.0173       | 0.0014     | 0.0013       | 0.89 | 0.00181     | 0.00004    | 4360.3      | 195.5      | 769.2      | 46.6       |            |
| 20111A148     | Zagi   | 45.6     | 14.5                       | 9623.0  | 6.2   | 1547         | 52.92  | 4.53                                       | 0.4990       | 0.0602      | 0.0598       | 1.1058     | 0.0970     | 0.0189       | 0.0016     | 0.0016       | 0.98 | 0.00181     | 0.00004    | 4238.6      | 177.5      | 756.1      | 46.8       |            |
| 20111A149     | Zagi   | 45.6     | 14.8                       | 9883.6  | 6.5   | 1525         | 52.11  | 3.82                                       | 0.4931       | 0.0623      | 0.0618       | 1.1596     | 0.0935     | 0.0192       | 0.0014     | 0.0014       | 0.91 | 0.00181     | 0.00004    | 4220.7      | 186.1      | 781.8      | 44.0       |            |
| 20111A150     | Zagi   | 45.6     | 14.5                       | 9821.9  | 6.5   | 1502         | 59.05  | 4.53                                       | 0.5109       | 0.0595      | 0.0590       | 1.0609     | 0.0986     | 0.0169       | 0.0013     | 0.0013       | 0.83 | 0.00181     | 0.00004    | 4273.2      | 170.7      | 734.3      | 48.6       |            |
| 20111A154     | Zagi   | 45.6     | 13.6                       | 9177.4  | 6.1   | 1511         | 52.79  | 3.80                                       | 0.5136       | 0.0697      | 0.0693       | 1.1592     | 0.1060     | 0.0189       | 0.0014     | 0.0014       | 0.79 | 0.00183     | 0.00005    | 4280.8      | 199.7      | 781.6      | 49.8       |            |
| 20111A155     | Zagi   | 45.6     | 12.9                       | 8765.6  | 5.8   | 1501         | 52.37  | 3.91                                       | 0.5340       | 0.0709      | 0.0705       | 1.1960     | 0.1029     | 0.0191       | 0.0015     | 0.0014       | 0.87 | 0.00182     | 0.00004    | 4338.0      | 195.5      | 798.7      | 47.6       |            |
| 20111A157     | Zagi   | 45.6     | 13.0                       | 8606.7  | 5.8   | 1489         | 51.08  | 3.57                                       | 0.5102       | 0.0707      | 0.0703       | 1.2244     | 0.1056     | 0.0196       | 0.0014     | 0.0014       | 0.81 | 0.00188     | 0.00004    | 4270.9      | 204.1      | 811.8      | 48.2       |            |
| 20111A158     | Zagi   | 45.6     | 13.0                       | 8995.0  | 6.0   | 1504         | 57.19  | 4.19                                       | 0.5293       | 0.0824      | 0.0820       | 1.0984     | 0.1034     | 0.0175       | 0.0013     | 0.0013       | 0.78 | 0.00182     | 0.00004    | 4325.0      | 229.4      | 752.6      | 50.1       |            |
| 20111A159     | Zagi   | 45.6     | 12.7                       | 8519.1  | 5.5   | 1542         | 53.68  | 4.46                                       | 0.6376       | 0.1328      | 0.1325       | 1.2832     | 0.1192     | 0.0186       | 0.0016     | 0.0015       | 0.90 | 0.00182     | 0.00004    | 4596.0      | 339.6      | 838.3      | 53.0       |            |
| 20111A160     | Zagi   | 45.6     | 12.5                       | 8440.5  | 5.7   | 1488         | 58.10  | 4.74                                       | 0.5520       | 0.1123      | 0.1120       | 1.0648     | 0.1064     | 0.0172       | 0.0014     | 0.0014       | 0.82 | 0.00186     | 0.00004    | 4386.7      | 301.5      | 736.2      | 52.3       |            |

| Analysis date | Sample | U-Pb<br>age<br>Ma | Concentration <sup>a</sup> |         |     | Th/U | Data for Tera-Wasserburg plot <sup>b</sup> |              |             |              |            |        | rho    | 208Pb/232Th |        | 207Pb/206Pb  |            | 207Pb/235U |            |            |            |            |            |
|---------------|--------|-------------------|----------------------------|---------|-----|------|--------------------------------------------|--------------|-------------|--------------|------------|--------|--------|-------------|--------|--------------|------------|------------|------------|------------|------------|------------|------------|
|               |        |                   | Pb                         | Th      | U   |      | 238U/206Pb                                 |              | 207Pb/206Pb |              | 207Pb/235U |        |        | 206Pb/238U  |        |              | Ratio      | 2 $\sigma$ | Age (Ma)   | 2 $\sigma$ | Age (Ma)   | 2 $\sigma$ |            |
|               |        |                   | ppm                        |         |     |      | Ratio                                      | 2 $\sigma^*$ | Ratio       | 2 $\sigma^*$ | 2 $\sigma$ | Ratio  |        | 2 $\sigma$  | Ratio  | 2 $\sigma^*$ | 2 $\sigma$ | Ratio      | 2 $\sigma$ | Age (Ma)   | 2 $\sigma$ | Age (Ma)   | 2 $\sigma$ |
| 20111A162     | Zagi   | 45.6              | 12.4                       | 8448.2  | 5.8 | 1452 | 54.44                                      | 4.31         | 0.5033      | 0.0670       | 0.0666     | 1.1245 | 0.1180 | 0.0184      | 0.0015 | 0.0015       | 0.75       | 0.00185    | 0.00004    | 4250.9     | 196.3      | 765.1      | 56.4       |
| 20111A128     | Zagi   | 45.6              | 14.7                       | 9742.5  | 6.5 | 1501 | 62.99                                      | 4.22         | 0.5575      | 0.0704       | 0.0699     | 1.2108 | 0.0977 | 0.0159      | 0.0011 | 0.0011       | 0.83       | 0.00183    | 0.00005    | 4401.0     | 184.4      | 805.6      | 44.9       |
| 20111A136     | Zagi   | 45.6              | 14.5                       | 9604.4  | 6.5 | 1472 | 56.08                                      | 4.00         | 0.5282      | 0.0611       | 0.0606     | 1.1657 | 0.0830 | 0.0178      | 0.0013 | 0.0013       | 1.00       | 0.00184    | 0.00004    | 4321.9     | 169.2      | 784.6      | 38.9       |
| 20111A138     | Zagi   | 45.6              | 14.8                       | 9677.0  | 6.6 | 1472 | 59.77                                      | 4.77         | 0.5956      | 0.0822       | 0.0817     | 1.2179 | 0.1040 | 0.0167      | 0.0014 | 0.0013       | 0.94       | 0.00186    | 0.00004    | 4497.3     | 199.9      | 808.8      | 47.6       |
| 20111A140     | Zagi   | 45.6              | 14.5                       | 9392.1  | 6.3 | 1487 | 52.80                                      | 3.88         | 0.4471      | 0.0600       | 0.0596     | 1.0504 | 0.0963 | 0.0189      | 0.0014 | 0.0014       | 0.80       | 0.00180    | 0.00005    | 4075.7     | 199.7      | 729.1      | 47.7       |
| 20111A151     | Zagi   | 45.6              | 15.0                       | 10066.5 | 6.7 | 1502 | 53.11                                      | 3.81         | 0.6194      | 0.2399       | 0.2397     | 1.1533 | 0.0728 | 0.0188      | 0.0014 | 0.0014       | 1.14       | 0.00184    | 0.00005    | 4554.1     | 723.5      | 778.8      | 34.3       |
| 20111A152     | Zagi   | 45.6              | 14.4                       | 9576.0  | 6.4 | 1486 | 56.42                                      | 4.31         | 0.6061      | 0.0953       | 0.0949     | 1.2336 | 0.1271 | 0.0177      | 0.0014 | 0.0014       | 0.74       | 0.00177    | 0.00004    | 4522.7     | 248.8      | 816.0      | 57.8       |
| 20111A153     | Zagi   | 45.6              | 13.8                       | 9054.1  | 5.9 | 1523 | 36.70                                      | 2.56         | 0.6742      | 0.0677       | 0.0669     | 2.2967 | 0.1286 | 0.0272      | 0.0019 | 0.0019       | 1.25       | 0.00181    | 0.00004    | 4676.9     | 151.2      | 1211.3     | 39.6       |
| 20111A156     | Zagi   | 45.6              | 12.8                       | 8660.2  | 5.6 | 1536 | 56.92                                      | 4.94         | 0.6177      | 0.0968       | 0.0964     | 1.2195 | 0.1080 | 0.0176      | 0.0015 | 0.0015       | 0.98       | 0.00185    | 0.00005    | 4550.4     | 247.5      | 809.6      | 49.4       |
| 20111A161     | Zagi   | 45.6              | 12.2                       | 8137.2  | 5.6 | 1465 | 61.80                                      | 5.07         | 0.5518      | 0.0720       | 0.0715     | 1.1092 | 0.1151 | 0.0162      | 0.0013 | 0.0013       | 0.79       | 0.00181    | 0.00005    | 4386.1     | 190.7      | 757.8      | 55.4       |

Note: a concentration uncertainty < 5%; b data not corrected for common-Pb; Decay constants of Jaffey et al. (1971) used and a small number data were deleted due to abnormal ages, i.e., quite young or older and different from other data in the sample group; To get a smaller MSWD value for U–Pb dating, some data of MNP were deleted due to intensive alteration, including the data which records the older mineralization stage of 30–34 Ma.

| Dates <sup>b</sup> |              |            |             |              |            |
|--------------------|--------------|------------|-------------|--------------|------------|
| 206Pb/238U         |              |            | 208Pb/232Th |              |            |
| Age<br>(Ma)        | 2 $\sigma^*$ | 2 $\sigma$ | Age<br>(Ma) | 2 $\sigma^*$ | 2 $\sigma$ |
| 435.4              | 11.8         | 9.4        | 419.7       | 9.4          | 6.9        |
| 552.1              | 18.2         | 15.5       | 432.0       | 9.0          | 6.1        |
| 548.3              | 26.7         | 24.3       | 445.6       | 12.2         | 10.1       |
| 442.2              | 11.5         | 9.0        | 433.9       | 8.7          | 5.7        |
| 455.3              | 10.5         | 7.6        | 437.1       | 9.3          | 6.6        |
| 450.7              | 10.2         | 7.3        | 440.5       | 9.0          | 6.0        |
| 449.7              | 10.1         | 7.1        | 447.0       | 9.8          | 7.1        |
| 444.1              | 10.2         | 7.4        | 450.8       | 10.9         | 8.5        |
| 470.9              | 10.9         | 7.9        | 453.6       | 9.2          | 6.0        |
| 451.6              | 11.0         | 8.3        | 452.6       | 9.2          | 6.1        |
| 451.2              | 11.5         | 8.8        | 454.0       | 9.2          | 6.1        |
| 204.7              | 23.7         | 23.1       | 26.0        | 0.8          | 0.7        |
| 63.7               | 3.8          | 3.7        | 26.4        | 0.7          | 0.6        |
| 58.5               | 3.3          | 3.1        | 26.4        | 0.8          | 0.7        |
| 71.5               | 4.9          | 4.7        | 26.7        | 0.8          | 0.6        |
| 65.5               | 4.8          | 4.6        | 26.7        | 0.8          | 0.6        |
| 51.7               | 2.6          | 2.5        | 26.8        | 0.9          | 0.8        |
| 64.8               | 4.7          | 4.6        | 27.0        | 0.7          | 0.6        |
| 65.2               | 4.3          | 4.1        | 27.1        | 0.7          | 0.6        |
| 72.4               | 4.5          | 4.4        | 27.1        | 0.8          | 0.6        |
| 56.0               | 3.6          | 3.4        | 27.4        | 0.7          | 0.6        |
| 116.7              | 10.3         | 10.1       | 27.6        | 0.8          | 0.7        |
| 105.5              | 10.2         | 10.0       | 27.9        | 0.7          | 0.6        |
| 117.4              | 10.9         | 10.7       | 28.8        | 0.8          | 0.6        |
| 114.6              | 10.0         | 9.7        | 31.2        | 0.9          | 0.8        |
| 65.1               | 4.4          | 4.3        | 31.4        | 0.9          | 0.8        |
| 63.9               | 3.8          | 3.6        | 31.9        | 1.0          | 0.8        |
| 75.8               | 4.5          | 4.3        | 32.0        | 0.9          | 0.8        |
| 434.4              | 14.7         | 12.7       | 379.6       | 9.7          | 7.7        |

| Dates <sup>b</sup> |              |            |             |              |            |
|--------------------|--------------|------------|-------------|--------------|------------|
| 206Pb/238U         |              |            | 208Pb/232Th |              |            |
| Age<br>(Ma)        | 2 $\sigma^*$ | 2 $\sigma$ | Age<br>(Ma) | 2 $\sigma^*$ | 2 $\sigma$ |
| 422.7              | 10.8         | 8.3        | 383.8       | 8.9          | 6.7        |
| 449.3              | 10.2         | 7.3        | 397.2       | 9.2          | 7.0        |
| 541.0              | 36.9         | 34.5       | 407.1       | 9.6          | 7.4        |
| 476.9              | 13.3         | 10.8       | 421.8       | 9.8          | 7.4        |
| 887.4              | 120.3        | 111.7      | 442.9       | 12.8         | 10.9       |
| 566.8              | 28.0         | 25.5       | 457.6       | 10.1         | 7.4        |
| 113.1              | 11.0         | 10.7       | 32.8        | 0.9          | <b>0.7</b> |
| 84.5               | 5.6          | 5.4        | 28.1        | 0.7          | 0.5        |
| 71.2               | 5.1          | 5.0        | 27.8        | 0.7          | 0.5        |
| 65.8               | 4.6          | 4.5        | 27.6        | 0.7          | 0.6        |
| 58.4               | 3.6          | 3.5        | 27.8        | 0.6          | 0.5        |
| 250.6              | 63.4         | 62.0       | 29.2        | 1.0          | 0.8        |
| 76.9               | 6.5          | 6.3        | 28.1        | 0.7          | 0.5        |
| 108.8              | 7.2          | 6.9        | 36.6        | 0.9          | 0.7        |
| 55.5               | 4.1          | 4.0        | 26.9        | 0.7          | 0.6        |
| 65.0               | 4.8          | 4.7        | 27.6        | 0.7          | 0.6        |
| 67.8               | 4.4          | 4.3        | 27.8        | 0.7          | 0.6        |
| 57.3               | 4.0          | 3.8        | 27.7        | 0.7          | 0.5        |
| 55.0               | 4.8          | 4.7        | 27.3        | 0.7          | 0.6        |
| 62.1               | 5.1          | 5.0        | 27.6        | 0.7          | 0.6        |
| 102.5              | 8.9          | 8.7        | 28.0        | 0.7          | 0.6        |
| 50.6               | 2.6          | 2.5        | 27.2        | 0.7          | 0.6        |
| 66.7               | 4.8          | 4.6        | 27.6        | 0.8          | 0.6        |
| 54.5               | 3.1          | 3.0        | 27.8        | 0.8          | 0.6        |
| 125.9              | 12.3         | 12.1       | 31.6        | 0.8          | 0.7        |
| 79.7               | 5.0          | 4.9        | 28.1        | 0.7          | 0.5        |
| 73.7               | 4.9          | 4.8        | 28.2        | 0.7          | 0.5        |

| Dates <sup>b</sup> |              |            |             |              |            |
|--------------------|--------------|------------|-------------|--------------|------------|
| 206Pb/238U         |              |            | 208Pb/232Th |              |            |
| Age (Ma)           | 2 $\sigma^*$ | 2 $\sigma$ | Age (Ma)    | 2 $\sigma^*$ | 2 $\sigma$ |
| 438.7              | 18.2         | 16.4       | 37.4        | 0.9          | 0.6        |
| 398.2              | 15.1         | 13.5       | 30.8        | 0.7          | 0.5        |
| 113.2              | 7.7          | 7.5        | 37.0        | 0.9          | 0.7        |
| 113.8              | 11.1         | 10.8       | 33.7        | 0.9          | 0.8        |
| 80.3               | 6.9          | 6.8        | 27.9        | 0.8          | 0.6        |
| 60.5               | 4.4          | 4.2        | 27.6        | 0.7          | 0.6        |
| 89.1               | 6.1          | 5.9        | 27.5        | 0.7          | 0.6        |
| 65.5               | 5.2          | 5.1        | 27.4        | 0.7          | 0.6        |
| 63.3               | 4.5          | 4.3        | 27.8        | 0.7          | 0.6        |
| 123.2              | 7.3          | 7.0        | 37.4        | 0.9          | 0.7        |
| 108.2              | 6.7          | 6.4        | 35.9        | 0.9          | 0.8        |
| 115.6              | 6.2          | 5.9        | 37.2        | 0.9          | 0.7        |
| 116.5              | 7.0          | 6.7        | 36.6        | 0.9          | 0.7        |
| 119.7              | 7.4          | 7.1        | 37.3        | 0.9          | 0.7        |
| 123.0              | 8.8          | 8.5        | 36.7        | 0.9          | 0.7        |
| 119.7              | 7.4          | 7.1        | 36.6        | 0.9          | 0.8        |
| 113.6              | 7.2          | 6.9        | 34.8        | 0.9          | 0.7        |
| 119.0              | 7.5          | 7.2        | 36.0        | 0.9          | 0.8        |
| 105.6              | 6.8          | 6.5        | 35.4        | 0.9          | 0.7        |
| 110.9              | 6.1          | 5.8        | 35.6        | 0.9          | 0.7        |
| 108.2              | 6.7          | 6.5        | 36.2        | 0.9          | 0.7        |
| 119.0              | 7.1          | 6.8        | 37.3        | 0.9          | 0.7        |
| 117.3              | 7.2          | 6.9        | 37.0        | 0.9          | 0.7        |
| 122.2              | 8.0          | 7.7        | 36.7        | 0.9          | 0.7        |
| 117.8              | 6.4          | 6.1        | 35.6        | 0.9          | 0.8        |
| 112.9              | 7.4          | 7.1        | 36.9        | 0.9          | 0.6        |
| 113.9              | 7.4          | 7.1        | 37.4        | 0.9          | 0.7        |



| Dates <sup>b</sup> |              |            |             |              |            |
|--------------------|--------------|------------|-------------|--------------|------------|
| 206Pb/238U         |              |            | 208Pb/232Th |              |            |
| Age<br>(Ma)        | 2 $\sigma^*$ | 2 $\sigma$ | Age<br>(Ma) | 2 $\sigma^*$ | 2 $\sigma$ |
| 122.8              | 6.7          | 6.4        | 37.3        | 0.9          | 0.7        |
| 114.2              | 6.3          | 6.0        | 37.0        | 0.9          | 0.7        |
| 129.0              | 7.6          | 7.2        | 36.3        | 0.9          | 0.7        |
| 119.5              | 8.0          | 7.7        | 35.1        | 0.9          | 0.7        |
| 109.5              | 7.5          | 7.2        | 37.2        | 0.9          | 0.7        |
| 111.5              | 6.6          | 6.3        | 36.2        | 0.9          | 0.7        |
| 108.4              | 8.3          | 8.1        | 37.2        | 0.9          | 0.7        |
| 118.1              | 7.4          | 7.1        | 37.9        | 0.9          | 0.7        |
| 104.8              | 7.0          | 6.8        | 37.0        | 1.0          | 0.8        |
| 114.7              | 7.5          | 7.2        | 37.6        | 0.9          | 0.7        |
| 123.1              | 6.6          | 6.2        | 37.7        | 0.9          | 0.7        |
| 127.2              | 7.2          | 6.9        | 37.3        | 0.8          | 0.6        |
| 103.4              | 6.6          | 6.4        | 36.2        | 0.9          | 0.7        |
| 69.9               | 4.0          | 3.9        | 41.0        | 1.0          | 0.8        |
| 72.8               | 4.5          | 4.4        | 42.2        | 1.1          | 0.8        |
| 69.7               | 4.8          | 4.7        | 41.8        | 1.1          | 0.8        |
| 83.2               | 6.7          | 6.5        | 41.2        | 1.1          | 0.9        |
| 75.5               | 4.8          | 4.7        | 42.0        | 1.0          | 0.7        |
| 95.4               | 10.3         | 10.1       | 41.4        | 1.1          | 0.9        |
| 73.7               | 4.2          | 4.1        | 42.2        | 1.0          | 0.8        |
| 71.9               | 5.4          | 5.3        | 41.1        | 1.1          | 0.9        |
| 65.3               | 4.5          | 4.4        | 42.0        | 1.0          | 0.8        |
| 67.9               | 4.1          | 4.0        | 41.7        | 1.1          | 0.9        |
| 67.4               | 4.2          | 4.1        | 42.6        | 1.1          | 0.8        |
| 73.1               | 4.1          | 3.9        | 41.4        | 1.0          | 0.8        |
| 69.3               | 4.6          | 4.4        | 42.2        | 1.0          | 0.8        |
| 67.9               | 4.4          | 4.2        | 40.6        | 1.0          | 0.8        |

| Dates <sup>b</sup> |              |            |             |              |            |
|--------------------|--------------|------------|-------------|--------------|------------|
| 206Pb/238U         |              |            | 208Pb/232Th |              |            |
| Age<br>(Ma)        | 2 $\sigma^*$ | 2 $\sigma$ | Age<br>(Ma) | 2 $\sigma^*$ | 2 $\sigma$ |
| 73.6               | 5.8          | 5.7        | 41.6        | 1.1          | 0.9        |
| 70.0               | 4.2          | 4.0        | 41.5        | 1.1          | 0.9        |
| 73.9               | 5.2          | 5.1        | 40.8        | 1.0          | 0.8        |
| 66.1               | 4.4          | 4.2        | 40.5        | 1.0          | 0.7        |
| 67.9               | 4.1          | 4.0        | 42.2        | 1.1          | 0.9        |
| 69.9               | 4.8          | 4.6        | 40.3        | 1.1          | 1.0        |
| 70.5               | 4.9          | 4.8        | 40.9        | 1.2          | 1.0        |
| 82.8               | 6.1          | 5.9        | 42.3        | 1.0          | 0.8        |
| 73.8               | 5.3          | 5.1        | 41.8        | 1.1          | 0.9        |
| 68.3               | 3.8          | 3.6        | 41.8        | 1.1          | 0.9        |
| 104.1              | 7.7          | 7.5        | 43.0        | 1.2          | 1.0        |
| 96.4               | 8.2          | 8.0        | 41.6        | 1.1          | 0.9        |
| 75.6               | 5.4          | 5.2        | 41.3        | 1.1          | 0.9        |
| 78.2               | 5.4          | 5.3        | 41.7        | 1.1          | 0.9        |
| 69.5               | 4.8          | 4.6        | 41.4        | 1.1          | 0.9        |
| 76.0               | 4.9          | 4.7        | 42.3        | 1.0          | 0.8        |
| 437.9              | 15.2         | 13.2       | 405.4       | 13.7         | 12.2       |
| 442.7              | 11.6         | 9.1        | 413.1       | 10.9         | 9.0        |
| 455.3              | 13.2         | 10.8       | 419.1       | 10.3         | 8.1        |
| 436.8              | 9.9          | 7.0        | 419.1       | 10.2         | 8.0        |
| 447.2              | 11.9         | 9.4        | 425.0       | 10.7         | 8.5        |
| 442.6              | 11.3         | 8.7        | 426.9       | 10.9         | 8.8        |
| 504.2              | 18.5         | 16.1       | 428.7       | 10.6         | 8.4        |
| 447.9              | 11.6         | 9.1        | 431.6       | 9.7          | 7.1        |
| 447.6              | 9.9          | 7.0        | 434.6       | 10.1         | 7.6        |
| 441.3              | 10.1         | 7.3        | 435.5       | 10.8         | 8.5        |
| 450.0              | 12.9         | 10.6       | 437.3       | 11.6         | 9.5        |
| 442.1              | 10.8         | 8.1        | 439.8       | 10.0         | 7.4        |

| Dates <sup>b</sup> |              |            |             |              |            |
|--------------------|--------------|------------|-------------|--------------|------------|
| 206Pb/238U         |              |            | 208Pb/232Th |              |            |
| Age<br>(Ma)        | 2 $\sigma^*$ | 2 $\sigma$ | Age<br>(Ma) | 2 $\sigma^*$ | 2 $\sigma$ |
| 447.4              | 10.2         | 7.4        | 448.9       | 11.0         | 8.6        |
| 466.5              | 19.1         | 17.1       | 250.6       | 6.6          | 5.3        |
| 426.2              | 17.2         | 15.4       | 314.0       | 9.4          | 8.1        |
| 2552.0             | 393.6        | 323.4      | 343.9       | 7.6          | 5.5        |
| 430.9              | 15.9         | 14.0       | 335.4       | 8.3          | 6.5        |
| 402.2              | 14.8         | 13.1       | 342.2       | 8.5          | 6.7        |
| 423.5              | 11.9         | 9.6        | 363.2       | 8.7          | 6.8        |
| 778.7              | 49.7         | 45.5       | 375.3       | 9.3          | 7.3        |
| 410.1              | 12.5         | 10.5       | 374.1       | 9.0          | 6.9        |
| 624.2              | 28.9         | 26.0       | 401.9       | 9.7          | 7.5        |
| 457.7              | 14.3         | 12.1       | 396.4       | 9.1          | 6.8        |
| 434.8              | 15.1         | 13.1       | 407.2       | 11.1         | 9.2        |
| 565.6              | 23.6         | 21.0       | 411.9       | 9.2          | 6.7        |
| 427.4              | 11.3         | 8.9        | 419.2       | 10.0         | 7.6        |
| 426.4              | 12.5         | 10.3       | 430.8       | 10.5         | 8.2        |
| 769.8              | 60.2         | 55.6       | 482.3       | 12.1         | 9.6        |
| 64.2               | 5.3          | 5.1        | 28.7        | 0.8          | 0.6        |
| 217.8              | 56.7         | 55.7       | 31.3        | 0.9          | 0.7        |
| 50.1               | 3.2          | 3.1        | 33.5        | 0.9          | 0.8        |
| 61.1               | 4.5          | 4.4        | 27.5        | 0.8          | 0.6        |
| 67.7               | 5.4          | 5.3        | 27.4        | 0.8          | 0.7        |
| 195.5              | 35.6         | 34.9       | 30.3        | 1.3          | 1.2        |
| 60.0               | 4.5          | 4.4        | 27.5        | 0.8          | 0.6        |
| 62.4               | 4.3          | 4.2        | 28.4        | 0.8          | 0.7        |
| 65.7               | 5.1          | 4.9        | 27.8        | 0.8          | 0.7        |
| 65.3               | 5.5          | 5.4        | 27.9        | 0.8          | 0.7        |
| 81.1               | 6.1          | 6.0        | 28.0        | 0.8          | 0.7        |
| 60.2               | 4.6          | 4.5        | 27.9        | 0.8          | 0.7        |
| 58.9               | 3.9          | 3.8        | 27.5        | 0.8          | 0.7        |
| 63.1               | 5.0          | 4.9        | 27.6        | 0.8          | 0.7        |
| 61.3               | 4.3          | 4.1        | 28.2        | 0.8          | 0.7        |
| 61.7               | 3.9          | 3.7        | 27.7        | 0.7          | 0.6        |

| Dates <sup>b</sup> |              |            |             |              |            |
|--------------------|--------------|------------|-------------|--------------|------------|
| 206Pb/238U         |              |            | 208Pb/232Th |              |            |
| Age<br>(Ma)        | 2 $\sigma^*$ | 2 $\sigma$ | Age<br>(Ma) | 2 $\sigma^*$ | 2 $\sigma$ |
| 62.6               | 4.2          | 4.1        | 27.9        | 0.7          | 0.6        |
| 120.6              | 13.5         | 13.3       | 27.7        | 0.8          | 0.7        |
| 78.8               | 6.0          | 5.9        | 27.2        | 0.8          | 0.7        |
| 57.4               | 3.8          | 3.7        | 26.7        | 0.8          | 0.7        |
| 55.1               | 3.5          | 3.3        | 27.9        | 0.8          | 0.7        |
| 62.2               | 4.4          | 4.2        | 28.0        | 0.8          | 0.6        |
| 60.3               | 4.4          | 4.3        | 27.7        | 0.8          | 0.7        |
| 56.0               | 3.4          | 3.3        | 27.0        | 0.8          | 0.7        |
| 168.4              | 7.1          | 6.5        | 33.8        | 1.0          | 0.8        |
| 46.0               | 3.5          | 3.4        | 27.9        | 0.8          | 0.7        |
| 243.4              | 12.3         | 11.5       | 29.4        | 0.9          | 0.8        |
| 256.6              | 10.7         | 9.7        | 28.1        | 0.8          | 0.7        |
| 74.8               | 5.6          | 5.4        | 27.9        | 0.8          | 0.7        |
| 96.1               | 8.4          | 8.2        | 27.7        | 0.8          | 0.7        |
| 77.7               | 6.3          | 6.2        | 40.3        | 1.4          | 1.3        |
| 73.1               | 6.2          | 6.1        | 42.4        | 1.4          | 1.3        |
| 76.4               | 6.2          | 6.0        | 41.1        | 1.4          | 1.3        |
| 75.5               | 6.1          | 6.0        | 41.8        | 1.3          | 1.1        |
| 71.5               | 5.5          | 5.3        | 40.6        | 1.4          | 1.3        |
| 75.4               | 5.5          | 5.4        | 40.9        | 1.4          | 1.3        |
| 70.8               | 5.2          | 5.1        | 40.8        | 1.4          | 1.2        |
| 73.6               | 5.7          | 5.5        | 41.6        | 1.3          | 1.1        |
| 69.7               | 5.8          | 5.7        | 39.6        | 1.4          | 1.2        |
| 67.7               | 5.6          | 5.4        | 42.3        | 1.4          | 1.2        |
| 67.6               | 5.2          | 5.1        | 40.0        | 1.3          | 1.2        |
| 74.5               | 5.8          | 5.7        | 40.7        | 1.5          | 1.3        |
| 75.9               | 6.8          | 6.6        | 33.4        | 1.1          | 0.9        |
| 66.1               | 5.4          | 5.3        | 42.7        | 1.6          | 1.5        |
| 61.2               | 4.4          | 4.3        | 44.4        | 1.9          | 1.8        |
| 63.0               | 4.5          | 4.3        | 43.7        | 1.8          | 1.6        |
| 67.7               | 4.4          | 4.2        | 40.5        | 1.2          | 1.0        |
| 65.4               | 4.1          | 4.0        | 39.1        | 1.2          | 1.0        |

| Dates <sup>b</sup> |              |            |             |              |            |
|--------------------|--------------|------------|-------------|--------------|------------|
| 206Pb/238U         |              |            | 208Pb/232Th |              |            |
| Age (Ma)           | 2 $\sigma^*$ | 2 $\sigma$ | Age (Ma)    | 2 $\sigma^*$ | 2 $\sigma$ |
| 62.7               | 4.8          | 4.7        | 39.6        | 1.2          | 1.0        |
| 63.1               | 4.3          | 4.1        | 40.1        | 1.2          | 1.0        |
| 66.4               | 4.5          | 4.4        | 40.9        | 1.1          | 1.0        |
| 83.2               | 5.8          | 5.6        | 41.2        | 1.2          | 1.0        |
| 73.3               | 5.5          | 5.4        | 41.3        | 1.4          | 1.3        |
| 68.4               | 5.2          | 5.1        | 39.4        | 1.4          | 1.2        |
| 56.2               | 3.3          | 3.1        | 44.4        | 1.7          | 1.5        |
| 53.7               | 3.9          | 3.8        | 37.9        | 1.4          | 1.3        |
| 51.6               | 3.9          | 3.8        | 39.0        | 1.1          | 0.9        |
| 59.3               | 4.6          | 4.5        | 37.6        | 1.1          | 0.9        |
| 62.2               | 5.7          | 5.6        | 36.8        | 1.2          | 1.0        |
| 63.0               | 6.8          | 6.7        | 33.9        | 1.1          | 0.9        |
| 117.7              | 9.6          | 9.4        | 36.8        | 1.0          | 0.8        |
| 116.6              | 7.8          | 7.6        | 36.3        | 1.0          | 0.8        |
| 115.0              | 8.1          | 7.9        | 36.5        | 1.0          | 0.9        |
| 125.9              | 9.3          | 9.0        | 36.7        | 1.0          | 0.8        |
| 119.9              | 9.7          | 9.5        | 36.1        | 1.0          | 0.8        |
| 115.7              | 9.0          | 8.8        | 36.6        | 1.1          | 0.9        |
| 116.8              | 9.2          | 8.9        | 36.7        | 1.0          | 0.8        |
| 113.4              | 8.9          | 8.7        | 37.2        | 1.0          | 0.8        |
| 122.3              | 9.5          | 9.2        | 36.2        | 1.0          | 0.9        |
| 118.0              | 8.7          | 8.4        | 37.1        | 1.0          | 0.9        |
| 110.3              | 8.7          | 8.4        | 36.5        | 1.0          | 0.8        |
| 120.7              | 10.5         | 10.2       | 36.6        | 1.0          | 0.9        |
| 122.5              | 9.2          | 8.9        | 36.6        | 1.0          | 0.8        |
| 108.2              | 8.5          | 8.2        | 36.5        | 1.1          | 0.9        |
| 121.0              | 8.9          | 8.6        | 36.9        | 1.1          | 1.0        |
| 121.9              | 9.3          | 9.0        | 36.7        | 1.0          | 0.9        |
| 125.0              | 8.9          | 8.7        | 38.0        | 1.0          | 0.9        |
| 111.7              | 8.4          | 8.1        | 36.7        | 1.0          | 0.8        |
| 119.0              | 10.1         | 9.8        | 36.7        | 1.0          | 0.8        |
| 110.0              | 9.1          | 8.9        | 37.6        | 1.1          | 0.9        |

| Dates <sup>b</sup> |              |            |             |              |            |
|--------------------|--------------|------------|-------------|--------------|------------|
| 206Pb/238U         |              |            | 208Pb/232Th |              |            |
| Age<br>(Ma)        | 2 $\sigma^*$ | 2 $\sigma$ | Age<br>(Ma) | 2 $\sigma^*$ | 2 $\sigma$ |
| 117.3              | 9.5          | 9.2        | 37.4        | 1.1          | 0.9        |
| 101.5              | 7.0          | 6.7        | 36.9        | 1.1          | 1.0        |
| 113.9              | 8.3          | 8.1        | 37.2        | 1.1          | 0.9        |
| 107.0              | 8.7          | 8.5        | 37.6        | 1.0          | 0.8        |
| 120.9              | 9.1          | 8.8        | 36.4        | 1.1          | 0.9        |
| 120.2              | 8.8          | 8.5        | 37.1        | 1.1          | 0.9        |
| 113.3              | 8.8          | 8.6        | 35.6        | 1.0          | 0.9        |
| 173.3              | 12.4         | 11.9       | 36.5        | 1.0          | 0.8        |
| 112.3              | 9.9          | 9.7        | 37.4        | 1.1          | 1.0        |
| 103.5              | 8.6          | 8.4        | 36.6        | 1.1          | 0.9        |

Table S-4 other bastnasite samples calibrated by K-9

| Analysis date | Sample | Final U-Pb Age (Ma) | Th/U | Data for Tera-Wasserburg plot |       |        |        |        |            |        |        |            |        |       | Dates   |          |             |          |             |          |            |       |            |  |
|---------------|--------|---------------------|------|-------------------------------|-------|--------|--------|--------|------------|--------|--------|------------|--------|-------|---------|----------|-------------|----------|-------------|----------|------------|-------|------------|--|
|               |        |                     |      | 238U/206Pb                    |       |        |        |        | 207Pb/235U |        |        | 206Pb/238U |        |       | rho     |          | 208Pb/232Th |          | 207Pb/206Pb |          | 207Pb/235U |       | 206Pb/238U |  |
|               |        |                     |      | Ratio                         | 2 σ*  | Ratio  | 2 σ*   | 2 σ    | Ratio      | 2 σ    | Ratio  | 2 σ*       | 2 σ    | Ratio | 2 σ     | Age (Ma) | 2sigma      | Age (Ma) | 2 σ         | Age (Ma) | 2 σ*       | 2 σ   |            |  |
|               |        |                     |      | 32μm3J5Hz3N2                  |       |        |        |        |            |        |        |            |        |       |         |          |             |          |             |          |            |       |            |  |
| 11231A16      | TPZ    | 413.0               | 353  | 14.57                         | 0.51  | 0.1259 | 0.0139 | 0.0138 | 1.1925     | 0.1470 | 0.0686 | 0.0024     | 0.0021 | 0.25  | 0.01823 | 0.0004   | 2040.4      | 193.4    | 807.4       | 68.3     | 434.4      | 15.2  | 12.7       |  |
| 11231A21      | TPZ    | 413.0               | 395  | 15.01                         | 0.41  | 0.0916 | 0.0071 | 0.0070 | 0.8303     | 0.0458 | 0.0666 | 0.0018     | 0.0014 | 0.39  | 0.01838 | 0.0004   | 1457.4      | 143.7    | 622.5       | 25.0     | 422.7      | 11.4  | 8.3        |  |
| 11231A30      | TPZ    | 413.0               | 123  | 14.01                         | 0.36  | 0.1145 | 0.0061 | 0.0059 | 1.1239     | 0.0593 | 0.0714 | 0.0018     | 0.0014 | 0.38  | 0.01896 | 0.0004   | 1871.9      | 89.5     | 771.9       | 27.3     | 449.3      | 11.6  | 7.3        |  |
| 11231A29      | TPZ    | 413.0               | 152  | 11.58                         | 0.80  | 0.1889 | 0.0305 | 0.0304 | 2.6996     | 0.6306 | 0.0864 | 0.0060     | 0.0058 | 0.29  | 0.01944 | 0.0004   | 2732.4      | 265.6    | 1339.4      | 173.3    | 541.0      | 37.6  | 34.5       |  |
| 11231A9       | TPZ    | 413.0               | 724  | 13.21                         | 0.40  | 0.1401 | 0.0097 | 0.0094 | 1.4989     | 0.0979 | 0.0757 | 0.0023     | 0.0019 | 0.39  | 0.01956 | 0.0003   | 2227.8      | 113.7    | 941.0       | 38.5     | 476.9      | 14.4  | 10.8       |  |
| 11231A31      | TPZ    | 413.0               | 231  | 6.84                          | 0.93  | 0.3921 | 0.0531 | 0.0527 | 9.6616     | 2.1965 | 0.1462 | 0.0199     | 0.0198 | 0.59  | 0.02065 | 0.0005   | 3879.9      | 202.8    | 2413.2      | 209.0    | 887.4      | 120.8 | 111.7      |  |
| 11231A32      | TPZ    | 413.0               | 279  | 10.96                         | 0.56  | 0.1927 | 0.0224 | 0.0222 | 2.6899     | 0.4226 | 0.0913 | 0.0046     | 0.0044 | 0.31  | 0.02188 | 0.0004   | 2766.4      | 188.6    | 1332.5      | 116.1    | 566.8      | 28.7  | 25.5       |  |
| 11231A50      | MNP    | 38.9                | 2360 | 55.34                         | 5.38  | 0.4398 | 0.2482 | 0.2481 | 1.3202     | 0.1863 | 0.0181 | 0.0018     | 0.0017 | 0.68  | 0.00155 | 0.00004  | 4051.2      | 974.4    | 854.6       | 81.5     | 115.5      | 11.2  | 11.0       |  |
| 11231A51      | MNP    | 38.9                | 926  | 74.28                         | 4.95  | 0.4823 | 0.0510 | 0.0504 | 0.8751     | 0.0713 | 0.0135 | 0.0009     | 0.0009 | 0.79  | 0.00132 | 0.00003  | 4188.0      | 155.3    | 638.4       | 38.6     | 86.2       | 5.7   | 5.5        |  |
| 11231A52      | MNP    | 38.9                | 942  | 88.31                         | 6.42  | 0.3985 | 0.0620 | 0.0617 | 0.5653     | 0.0561 | 0.0113 | 0.0008     | 0.0008 | 0.71  | 0.00131 | 0.00003  | 3903.5      | 235.2    | 455.0       | 36.4     | 72.6       | 5.3   | 5.1        |  |
| 11231A54      | MNP    | 38.9                | 908  | 95.69                         | 6.73  | 0.3616 | 0.0662 | 0.0660 | 0.4682     | 0.0470 | 0.0105 | 0.0007     | 0.0007 | 0.68  | 0.00130 | 0.00003  | 3756.5      | 280.9    | 389.9       | 32.5     | 67.0       | 4.7   | 4.6        |  |
| 11231A56      | MNP    | 38.9                | 676  | 107.97                        | 6.69  | 0.3203 | 0.0399 | 0.0396 | 0.3925     | 0.0328 | 0.0093 | 0.0006     | 0.0006 | 0.72  | 0.00130 | 0.00002  | 3571.3      | 190.6    | 336.2       | 23.9     | 59.4       | 3.7   | 3.5        |  |
| 11231A59      | MNP    | 38.9                | 811  | 24.85                         | 6.29  | 0.4823 | 0.0562 | 0.0557 | 3.7911     | 1.1781 | 0.0402 | 0.0102     | 0.0102 | 0.81  | 0.00137 | 0.00004  | 4188.0      | 171.4    | 1590.9      | 249.7    | 254.4      | 64.4  | 63.0       |  |
| 11231A60      | MNP    | 38.9                | 620  | 82.14                         | 6.97  | 0.4167 | 0.0551 | 0.0547 | 0.7715     | 0.1650 | 0.0122 | 0.0010     | 0.0010 | 0.39  | 0.00132 | 0.00003  | 3972.2      | 197.9    | 580.6       | 94.6     | 78.0       | 6.6   | 6.5        |  |
| 11231A62      | MNP    | 38.9                | 1501 | 57.96                         | 3.88  | 0.5788 | 0.0780 | 0.0775 | 1.2666     | 0.0945 | 0.0173 | 0.0012     | 0.0011 | 0.87  | 0.00171 | 0.00004  | 4457.4      | 196.4    | 830.9       | 42.4     | 110.3      | 7.4   | 7.1        |  |
| 11231A69      | MNP    | 38.9                | 666  | 114.52                        | 8.67  | 0.3934 | 0.0785 | 0.0783 | 0.4013     | 0.0410 | 0.0087 | 0.0007     | 0.0006 | 0.72  | 0.00126 | 0.00003  | 3884.3      | 304.5    | 342.6       | 29.7     | 56.0       | 4.2   | 4.1        |  |
| 11231A71      | MNP    | 38.9                | 700  | 97.68                         | 7.40  | 0.3621 | 0.0634 | 0.0631 | 0.4548     | 0.0457 | 0.0102 | 0.0008     | 0.0008 | 0.74  | 0.00130 | 0.00003  | 3759.0      | 267.9    | 380.6       | 31.9     | 65.7       | 5.0   | 4.8        |  |
| 11231A72      | MNP    | 38.9                | 651  | 93.65                         | 6.24  | 0.3384 | 0.0554 | 0.0552 | 0.4686     | 0.0346 | 0.0107 | 0.0007     | 0.0007 | 0.88  | 0.00132 | 0.00003  | 3655.2      | 252.2    | 390.2       | 23.9     | 68.5       | 4.6   | 4.4        |  |
| 11231A75      | MNP    | 38.9                | 736  | 110.91                        | 7.75  | 0.3068 | 0.0435 | 0.0432 | 0.3827     | 0.0428 | 0.0090 | 0.0006     | 0.0006 | 0.61  | 0.00133 | 0.00003  | 3504.9      | 219.5    | 329.0       | 31.4     | 57.9       | 4.0   | 3.9        |  |
| 11231A77      | MNP    | 38.9                | 715  | 115.61                        | 10.16 | 0.4010 | 0.0768 | 0.0766 | 0.3835     | 0.0361 | 0.0086 | 0.0008     | 0.0007 | 0.92  | 0.00132 | 0.00003  | 3912.9      | 291.4    | 329.6       | 26.5     | 55.5       | 4.9   | 4.8        |  |
| 11231A78      | MNP    | 38.9                | 697  | 102.20                        | 8.38  | 0.4117 | 0.0688 | 0.0685 | 0.4808     | 0.0547 | 0.0098 | 0.0008     | 0.0008 | 0.71  | 0.00133 | 0.00003  | 3952.3      | 253.2    | 398.6       | 37.5     | 62.8       | 5.1   | 5.0        |  |
| 11231A80      | MNP    | 38.9                | 718  | 61.76                         | 5.38  | 0.5867 | 0.0781 | 0.0776 | 1.1492     | 0.1193 | 0.0162 | 0.0014     | 0.0014 | 0.82  | 0.00136 | 0.00003  | 4475.6      | 193.8    | 776.9       | 56.4     | 103.5      | 9.0   | 8.8        |  |
| 11231A81      | MNP    | 38.9                | 488  | 125.57                        | 6.56  | 0.2913 | 0.0383 | 0.0380 | 0.3055     | 0.0323 | 0.0080 | 0.0004     | 0.0004 | 0.47  | 0.00133 | 0.00003  | 3424.4      | 204.3    | 270.7       | 25.1     | 51.1       | 2.7   | 2.5        |  |
| 11231A82      | MNP    | 38.9                | 686  | 95.19                         | 6.85  | 0.3591 | 0.0542 | 0.0539 | 0.4673     | 0.0514 | 0.0105 | 0.0008     | 0.0007 | 0.64  | 0.00136 | 0.00003  | 3746.1      | 230.1    | 389.3       | 35.6     | 67.4       | 4.8   | 4.7        |  |
| 11231A83      | MNP    | 38.9                | 463  | 116.68                        | 6.73  | 0.3263 | 0.0667 | 0.0665 | 0.3331     | 0.0350 | 0.0086 | 0.0005     | 0.0005 | 0.53  | 0.00137 | 0.00003  | 3599.7      | 319.0    | 291.9       | 26.6     | 55.0       | 3.2   | 3.0        |  |
| 11231A49      | MNP    | 38.9                | 2472 | 49.60                         | 4.88  | 0.2946 | 0.3381 | 0.3381 | 1.2668     | 0.1800 | 0.0202 | 0.0020     | 0.0020 | 0.68  | 0.00149 | 0.00003  | 3442.3      | 1142.7   | 831.0       | 80.6     | 128.7      | 12.7  | 12.4       |  |

| Analysis date | Sample | Final U-Pb Age (Ma) | Th/U | Data for Tera-Wasserburg plot |              |        |              |            |             |            |        |              |            |            | Dates      |          |        |             |          |             |          |              |            |            |  |
|---------------|--------|---------------------|------|-------------------------------|--------------|--------|--------------|------------|-------------|------------|--------|--------------|------------|------------|------------|----------|--------|-------------|----------|-------------|----------|--------------|------------|------------|--|
|               |        |                     |      | 238U/206Pb                    |              |        |              |            | 207Pb/206Pb |            |        | 207Pb/235U   |            | 206Pb/238U |            |          | rho    | 208Pb/232Th |          | 207Pb/206Pb |          | 207Pb/235U   |            | 206Pb/238U |  |
|               |        |                     |      | Ratio                         | 2 $\sigma^*$ | Ratio  | 2 $\sigma^*$ | 2 $\sigma$ | Ratio       | 2 $\sigma$ | Ratio  | 2 $\sigma^*$ | 2 $\sigma$ | Ratio      | 2 $\sigma$ | Age (Ma) |        | 2sigma      | Age (Ma) | 2 $\sigma$  | Age (Ma) | 2 $\sigma^*$ | 2 $\sigma$ |            |  |
|               |        |                     |      |                               |              |        |              |            |             |            |        |              |            |            |            |          |        |             |          |             |          |              |            |            |  |
| 11231A53      | MNP    | 38.9                | 883  | 78.86                         | 5.03         | 0.3980 | 0.0478       | 0.0474     | 0.6519      | 0.0529     | 0.0127 | 0.0008       | 0.0008     | 0.76       | 0.00132    | 0.00003  | 3901.7 | 179.9       | 509.7    | 32.5        | 81.2     | 5.2          | 5.0        |            |  |
| 11231A55      | MNP    | 38.9                | 902  | 85.40                         | 5.77         | 0.3665 | 0.0448       | 0.0444     | 0.5452      | 0.0502     | 0.0117 | 0.0008       | 0.0008     | 0.71       | 0.00133    | 0.00003  | 3777.5 | 184.9       | 441.9    | 33.0        | 75.0     | 5.1          | 4.9        |            |  |
| 11231A57      | MNP    | 38.9                | 325  | 13.97                         | 0.59         | 0.7886 | 0.0222       | 0.0185     | 7.7797      | 0.3300     | 0.0716 | 0.0030       | 0.0028     | 0.93       | 0.00175    | 0.00003  | error  | error       | 2205.9   | 38.2        | 445.8    | 18.9         | 16.9       |            |  |
| 11231A58      | MNP    | 38.9                | 785  | 15.45                         | 0.60         | 0.7844 | 0.0344       | 0.0322     | 6.9023      | 0.2522     | 0.0647 | 0.0025       | 0.0023     | 0.97       | 0.00144    | 0.00003  | error  | error       | 2099.0   | 32.4        | 404.4    | 15.8         | 14.0       |            |  |
| 11231A61      | MNP    | 38.9                | 1481 | 55.66                         | 3.85         | 0.4732 | 0.0585       | 0.0581     | 1.0738      | 0.0798     | 0.0180 | 0.0012       | 0.0012     | 0.90       | 0.00173    | 0.00003  | 4160.2 | 182.7       | 740.6    | 39.1        | 114.8    | 7.9          | 7.6        |            |  |
| 11231A63      | MNP    | 38.9                | 2264 | 55.43                         | 5.43         | 0.4584 | 0.2329       | 0.2327     | 1.0711      | 0.1351     | 0.0180 | 0.0018       | 0.0017     | 0.77       | 0.00157    | 0.00004  | 4112.8 | 1090.9      | 739.3    | 66.2        | 115.3    | 11.3         | 11.0       |            |  |
| 11231A70      | MNP    | 38.9                | 748  | 78.98                         | 6.90         | 0.3534 | 0.0530       | 0.0527     | 0.5697      | 0.0713     | 0.0127 | 0.0011       | 0.0011     | 0.69       | 0.00131    | 0.00003  | 3721.9 | 229.0       | 457.8    | 46.1        | 81.1     | 7.1          | 6.9        |            |  |
| 11231A73      | MNP    | 38.9                | 712  | 105.02                        | 7.66         | 0.4276 | 0.0632       | 0.0628     | 0.4978      | 0.0437     | 0.0095 | 0.0007       | 0.0007     | 0.81       | 0.00131    | 0.00003  | 4009.1 | 221.3       | 410.2    | 29.6        | 61.1     | 4.5          | 4.3        |            |  |
| 11231A74      | MNP    | 38.9                | 690  | 71.13                         | 4.93         | 0.4674 | 0.0554       | 0.0550     | 0.8207      | 0.0686     | 0.0141 | 0.0010       | 0.0009     | 0.81       | 0.00131    | 0.00003  | 4141.7 | 175.3       | 608.4    | 38.2        | 90.0     | 6.2          | 6.0        |            |  |
| 11231A76      | MNP    | 38.9                | 716  | 96.97                         | 7.73         | 0.5473 | 0.4464       | 0.4463     | 0.3829      | 0.0524     | 0.0103 | 0.0008       | 0.0008     | 0.57       | 0.00132    | 0.00003  | 4375.9 | 2731.8      | 329.2    | 38.5        | 66.1     | 5.3          | 5.1        |            |  |
| 11231A79      | MNP    | 38.9                | 623  | 100.32                        | 7.11         | 0.4602 | 0.0563       | 0.0559     | 0.5718      | 0.0464     | 0.0100 | 0.0007       | 0.0007     | 0.85       | 0.00135    | 0.00003  | 4120.4 | 181.4       | 459.2    | 30.0        | 63.9     | 4.5          | 4.4        |            |  |
| 11231A100     | Tribal | 44.8                | 518  | 89.43                         | 5.27         | 0.2730 | 0.0379       | 0.0377     | 0.3970      | 0.0416     | 0.0112 | 0.0007       | 0.0006     | 0.54       | 0.00193    | 0.00004  | 3323.8 | 217.9       | 339.4    | 30.2        | 71.7     | 4.2          | 4.0        |            |  |
| 11231A101     | Tribal | 44.8                | 517  | 85.88                         | 5.43         | 0.3661 | 0.0450       | 0.0446     | 0.5851      | 0.0544     | 0.0116 | 0.0007       | 0.0007     | 0.66       | 0.00198    | 0.00004  | 3775.6 | 186.1       | 467.8    | 34.9        | 74.6     | 4.7          | 4.5        |            |  |
| 11231A102     | Tribal | 44.8                | 512  | 89.68                         | 6.31         | 0.3527 | 0.0473       | 0.0469     | 0.5048      | 0.0483     | 0.0112 | 0.0008       | 0.0008     | 0.72       | 0.00197    | 0.00004  | 3720.4 | 204.8       | 415.0    | 32.6        | 71.5     | 5.0          | 4.9        |            |  |
| 11231A103     | Tribal | 44.8                | 512  | 75.09                         | 6.10         | 0.3895 | 0.0482       | 0.0479     | 0.7090      | 0.0979     | 0.0133 | 0.0011       | 0.0011     | 0.58       | 0.00194    | 0.00004  | 3868.9 | 186.4       | 544.1    | 58.2        | 85.3     | 6.9          | 6.7        |            |  |
| 11231A104     | Tribal | 44.8                | 440  | 82.79                         | 5.39         | 0.4034 | 0.0473       | 0.0469     | 0.6353      | 0.0718     | 0.0121 | 0.0008       | 0.0008     | 0.56       | 0.00197    | 0.00004  | 3921.9 | 175.6       | 499.4    | 44.6        | 77.4     | 5.0          | 4.9        |            |  |
| 11231A105     | Tribal | 44.8                | 446  | 65.39                         | 7.08         | 0.4544 | 0.0507       | 0.0502     | 0.9521      | 0.1584     | 0.0153 | 0.0017       | 0.0016     | 0.64       | 0.00195    | 0.00004  | 4099.7 | 164.8       | 679.2    | 82.4        | 97.8     | 10.6         | 10.4       |            |  |
| 11231A106     | Tribal | 44.8                | 451  | 84.79                         | 5.02         | 0.4185 | 0.0436       | 0.0431     | 0.6704      | 0.0529     | 0.0118 | 0.0007       | 0.0007     | 0.72       | 0.00198    | 0.00004  | 3976.9 | 154.9       | 520.9    | 32.2        | 75.6     | 4.5          | 4.3        |            |  |
| 11231A107     | Tribal | 44.8                | 419  | 86.99                         | 6.68         | 0.3408 | 0.0419       | 0.0416     | 0.5193      | 0.0625     | 0.0115 | 0.0009       | 0.0009     | 0.62       | 0.00193    | 0.00004  | 3666.4 | 187.7       | 424.7    | 41.8        | 73.7     | 5.7          | 5.5        |            |  |
| 11231A108     | Tribal | 44.8                | 420  | 95.84                         | 6.79         | 0.3497 | 0.0386       | 0.0382     | 0.4956      | 0.0466     | 0.0104 | 0.0007       | 0.0007     | 0.73       | 0.00198    | 0.00004  | 3705.5 | 167.4       | 408.7    | 31.6        | 66.9     | 4.7          | 4.6        |            |  |
| 11231A115     | Tribal | 44.8                | 417  | 92.12                         | 5.68         | 0.3413 | 0.0393       | 0.0390     | 0.4755      | 0.0429     | 0.0109 | 0.0007       | 0.0006     | 0.66       | 0.00196    | 0.00004  | 3668.8 | 175.3       | 395.0    | 29.5        | 69.6     | 4.3          | 4.1        |            |  |
| 11231A116     | Tribal | 44.8                | 414  | 92.81                         | 5.92         | 0.3025 | 0.0437       | 0.0435     | 0.4302      | 0.0456     | 0.0108 | 0.0007       | 0.0007     | 0.58       | 0.00201    | 0.00004  | 3483.0 | 229.8       | 363.3    | 32.4        | 69.1     | 4.4          | 4.2        |            |  |
| 11231A117     | Tribal | 44.8                | 411  | 85.51                         | 4.86         | 0.3220 | 0.0369       | 0.0366     | 0.5245      | 0.0524     | 0.0117 | 0.0007       | 0.0006     | 0.55       | 0.00195    | 0.00004  | 3579.3 | 174.6       | 428.1    | 34.9        | 75.0     | 4.3          | 4.1        |            |  |
| 11231A118     | Tribal | 44.8                | 414  | 90.21                         | 6.04         | 0.3582 | 0.0397       | 0.0393     | 0.5464      | 0.0646     | 0.0111 | 0.0007       | 0.0007     | 0.55       | 0.00199    | 0.00004  | 3742.3 | 167.6       | 442.7    | 42.4        | 71.1     | 4.8          | 4.6        |            |  |
| 11231A119     | Tribal | 44.8                | 430  | 92.07                         | 6.01         | 0.3288 | 0.0349       | 0.0345     | 0.4846      | 0.0469     | 0.0109 | 0.0007       | 0.0007     | 0.65       | 0.00192    | 0.00004  | 3611.6 | 161.7       | 401.3    | 32.1        | 69.6     | 4.5          | 4.4        |            |  |
| 11231A120     | Tribal | 44.8                | 424  | 84.99                         | 6.74         | 0.3940 | 0.0488       | 0.0484     | 0.6649      | 0.0911     | 0.0118 | 0.0009       | 0.0009     | 0.57       | 0.00197    | 0.00004  | 3886.7 | 185.9       | 517.6    | 55.6        | 75.4     | 6.0          | 5.8        |            |  |
| 11231A121     | Tribal | 44.8                | 427  | 89.42                         | 5.41         | 0.3299 | 0.0353       | 0.0349     | 0.4793      | 0.0464     | 0.0112 | 0.0007       | 0.0007     | 0.60       | 0.00196    | 0.00004  | 3616.6 | 163.0       | 397.6    | 31.9        | 71.7     | 4.3          | 4.2        |            |  |
| 11231A122     | Tribal | 44.8                | 419  | 84.71                         | 6.06         | 0.3629 | 0.0513       | 0.0510     | 0.5566      | 0.0561     | 0.0118 | 0.0008       | 0.0008     | 0.69       | 0.00193    | 0.00004  | 3762.0 | 215.1       | 449.3    | 36.6        | 75.7     | 5.4          | 5.2        |            |  |
| 11231A123     | Tribal | 44.8                | 423  | 94.74                         | 6.35         | 0.2944 | 0.0366       | 0.0363     | 0.3943      | 0.0372     | 0.0106 | 0.0007       | 0.0007     | 0.69       | 0.00192    | 0.00004  | 3442.6 | 192.9       | 337.5    | 27.1        | 67.7     | 4.5          | 4.4        |            |  |



| Analysis date | Sample | Final U-Pb Age (Ma) | Th/U | Data for Tera-Wasserburg plot |      |        |             |        |        |            |        |            |        | Dates |         |             |        |             |        |            |       |            |      |
|---------------|--------|---------------------|------|-------------------------------|------|--------|-------------|--------|--------|------------|--------|------------|--------|-------|---------|-------------|--------|-------------|--------|------------|-------|------------|------|
|               |        |                     |      | 238U/206Pb                    |      |        | 207Pb/206Pb |        |        | 207Pb/235U |        | 206Pb/238U |        |       | rho     | 208Pb/232Th |        | 207Pb/206Pb |        | 207Pb/235U |       | 206Pb/238U |      |
|               |        |                     |      | Ratio                         | 2 σ* | 2 σ    | Ratio       | 2 σ*   | 2 σ    | Ratio      | 2 σ    | Ratio      | 2 σ*   | 2 σ   |         | Ratio       | 2 σ    | Age (Ma)    | 2sigma | Age (Ma)   | 2 σ   | Age (Ma)   | 2 σ* |
| 11231A124     | Tribal | 44.8                | 413  | 92.25                         | 5.65 | 0.3387 | 0.0411      | 0.0407 | 0.4802 | 0.0445     | 0.0108 | 0.0007     | 0.0006 | 0.64  | 0.00200 | 0.00004     | 3657.1 | 184.1       | 398.2  | 30.5       | 69.5  | 4.3        | 4.1  |
| 11231A125     | Tribal | 44.8                | 420  | 89.55                         | 6.16 | 0.3493 | 0.0405      | 0.0401 | 0.5007 | 0.0496     | 0.0112 | 0.0008     | 0.0007 | 0.68  | 0.00191 | 0.00005     | 3705.6 | 175.9       | 412.2  | 33.5       | 71.6  | 4.9        | 4.8  |
| 11231A126     | Tribal | 44.8                | 420  | 88.87                         | 6.29 | 0.3267 | 0.0414      | 0.0411 | 0.4637 | 0.0424     | 0.0113 | 0.0008     | 0.0008 | 0.75  | 0.00194 | 0.00005     | 3601.5 | 194.4       | 386.8  | 29.4       | 72.1  | 5.1        | 4.9  |
| 11231A127     | Tribal | 44.8                | 419  | 75.63                         | 5.61 | 0.4472 | 0.0457      | 0.0452 | 0.8261 | 0.0963     | 0.0132 | 0.0010     | 0.0010 | 0.62  | 0.00201 | 0.00004     | 4076.2 | 151.9       | 611.4  | 53.6       | 84.7  | 6.3        | 6.1  |
| 11231A128     | Tribal | 44.8                | 377  | 84.84                         | 6.12 | 0.4045 | 0.0460      | 0.0456 | 0.6356 | 0.0726     | 0.0118 | 0.0008     | 0.0008 | 0.62  | 0.00198 | 0.00004     | 3925.9 | 170.1       | 499.6  | 45.1       | 75.5  | 5.4        | 5.3  |
| 11231A129     | Tribal | 44.8                | 375  | 91.78                         | 5.17 | 0.3563 | 0.0383      | 0.0379 | 0.5163 | 0.0494     | 0.0109 | 0.0006     | 0.0006 | 0.56  | 0.00198 | 0.00005     | 3734.3 | 162.7       | 422.7  | 33.1       | 69.9  | 3.9        | 3.7  |
| 11231A94      | Tribal | 44.8                | 300  | 59.88                         | 4.51 | 0.4708 | 0.0502      | 0.0497 | 1.0023 | 0.1078     | 0.0167 | 0.0013     | 0.0012 | 0.68  | 0.00203 | 0.00005     | 4152.3 | 157.1       | 705.0  | 54.7       | 106.8 | 8.0        | 7.8  |
| 11231A95      | Tribal | 44.8                | 490  | 64.72                         | 5.58 | 0.4715 | 0.0492      | 0.0486 | 0.9965 | 0.1370     | 0.0155 | 0.0013     | 0.0013 | 0.62  | 0.00196 | 0.00005     | 4154.6 | 153.6       | 702.0  | 69.7       | 98.8  | 8.5        | 8.3  |
| 11231A96      | Tribal | 44.8                | 508  | 82.65                         | 5.97 | 0.3860 | 0.0482      | 0.0478 | 0.6445 | 0.0972     | 0.0121 | 0.0009     | 0.0009 | 0.47  | 0.00194 | 0.00005     | 3855.3 | 188.0       | 505.1  | 60.0       | 77.5  | 5.6        | 5.4  |
| 11231A97      | Tribal | 44.8                | 495  | 79.90                         | 5.64 | 0.3712 | 0.0444      | 0.0440 | 0.6152 | 0.0576     | 0.0125 | 0.0009     | 0.0009 | 0.73  | 0.00196 | 0.00005     | 3796.1 | 179.8       | 486.9  | 36.2       | 80.2  | 5.7        | 5.5  |
| 11231A98      | Tribal | 44.8                | 514  | 90.01                         | 6.28 | 0.3924 | 0.0581      | 0.0578 | 0.5732 | 0.0642     | 0.0111 | 0.0008     | 0.0008 | 0.61  | 0.00195 | 0.00005     | 3880.6 | 223.8       | 460.1  | 41.4       | 71.2  | 5.0        | 4.8  |
| 11231A99      | Tribal | 44.8                | 516  | 82.18                         | 5.39 | 0.3647 | 0.0407      | 0.0403 | 0.5682 | 0.0518     | 0.0122 | 0.0008     | 0.0008 | 0.70  | 0.00199 | 0.00004     | 3769.7 | 168.5       | 456.8  | 33.6       | 78.0  | 5.1        | 4.9  |
| 11231A138     | Zagi   | 51.0                | 1536 | 50.86                         | 3.06 | 0.4742 | 0.0485      | 0.0480 | 1.2067 | 0.0839     | 0.0197 | 0.0012     | 0.0011 | 0.83  | 0.00178 | 0.00003     | 4164.8 | 150.3       | 803.7  | 38.6       | 125.5 | 7.6        | 7.2  |
| 11231A139     | Zagi   | 51.0                | 1454 | 58.00                         | 3.63 | 0.4528 | 0.0504      | 0.0499 | 1.0304 | 0.0791     | 0.0172 | 0.0011     | 0.0010 | 0.79  | 0.00171 | 0.00004     | 4094.8 | 164.6       | 719.1  | 39.6       | 110.2 | 6.9        | 6.6  |
| 11231A140     | Zagi   | 51.0                | 1465 | 54.28                         | 2.98 | 0.4870 | 0.0455      | 0.0449 | 1.1631 | 0.0777     | 0.0184 | 0.0010     | 0.0010 | 0.78  | 0.00178 | 0.00003     | 4202.3 | 136.7       | 783.4  | 36.5       | 117.7 | 6.5        | 6.1  |
| 11231A141     | Zagi   | 51.0                | 1427 | 53.89                         | 3.30 | 0.4529 | 0.0503      | 0.0499 | 1.1351 | 0.0893     | 0.0186 | 0.0011     | 0.0011 | 0.75  | 0.00175 | 0.00003     | 4094.8 | 164.3       | 770.2  | 42.5       | 118.5 | 7.3        | 6.9  |
| 11231A142     | Zagi   | 51.0                | 1447 | 52.51                         | 3.31 | 0.4930 | 0.0491      | 0.0485 | 1.1920 | 0.0782     | 0.0190 | 0.0012     | 0.0012 | 0.93  | 0.00178 | 0.00004     | 4220.3 | 140.3       | 796.9  | 36.2       | 121.6 | 7.7        | 7.3  |
| 11231A143     | Zagi   | 51.0                | 1502 | 51.13                         | 3.71 | 0.4716 | 0.0513      | 0.0507 | 1.1355 | 0.0846     | 0.0196 | 0.0014     | 0.0014 | 0.95  | 0.00176 | 0.00003     | 4155.2 | 160.2       | 770.4  | 40.2       | 124.9 | 9.1        | 8.7  |
| 11231A145     | Zagi   | 51.0                | 1399 | 52.61                         | 3.36 | 0.4561 | 0.0536      | 0.0532 | 1.0840 | 0.0850     | 0.0190 | 0.0012     | 0.0012 | 0.79  | 0.00175 | 0.00004     | 4105.3 | 174.1       | 745.6  | 41.4       | 121.4 | 7.7        | 7.4  |
| 11231A146     | Zagi   | 51.0                | 1424 | 55.52                         | 3.64 | 0.5060 | 0.0558      | 0.0552 | 1.1904 | 0.0787     | 0.0180 | 0.0012     | 0.0011 | 0.96  | 0.00167 | 0.00004     | 4259.0 | 161.4       | 796.2  | 36.5       | 115.1 | 7.5        | 7.2  |
| 11231A147     | Zagi   | 51.0                | 1331 | 52.99                         | 3.45 | 0.4841 | 0.0502      | 0.0496 | 1.2285 | 0.0943     | 0.0189 | 0.0012     | 0.0012 | 0.82  | 0.00172 | 0.00004     | 4193.7 | 152.9       | 813.7  | 43.0       | 120.5 | 7.8        | 7.5  |
| 11231A148     | Zagi   | 51.0                | 1332 | 59.82                         | 4.00 | 0.4322 | 0.0498      | 0.0494 | 0.9247 | 0.0685     | 0.0167 | 0.0011     | 0.0011 | 0.88  | 0.00170 | 0.00004     | 4025.2 | 171.6       | 664.8  | 36.2       | 106.9 | 7.1        | 6.9  |
| 11231A149     | Zagi   | 51.0                | 1329 | 57.01                         | 3.31 | 0.4059 | 0.0453      | 0.0449 | 0.9807 | 0.0820     | 0.0175 | 0.0010     | 0.0010 | 0.67  | 0.00171 | 0.00004     | 3931.2 | 167.0       | 693.9  | 42.0       | 112.1 | 6.5        | 6.2  |
| 11231A151     | Zagi   | 51.0                | 1241 | 58.55                         | 3.87 | 0.4914 | 0.0471      | 0.0465 | 1.0742 | 0.0828     | 0.0171 | 0.0011     | 0.0011 | 0.83  | 0.00174 | 0.00003     | 4215.7 | 140.9       | 740.8  | 40.5       | 109.2 | 7.2        | 6.9  |
| 11231A157     | Zagi   | 51.0                | 698  | 53.34                         | 3.35 | 0.4973 | 0.0690      | 0.0685 | 1.1456 | 0.0804     | 0.0187 | 0.0012     | 0.0011 | 0.86  | 0.00179 | 0.00004     | 4235.2 | 204.8       | 775.2  | 38.1       | 119.7 | 7.5        | 7.2  |
| 11231A158     | Zagi   | 51.0                | 912  | 54.12                         | 3.48 | 0.4953 | 0.0499      | 0.0494 | 1.1819 | 0.0875     | 0.0185 | 0.0012     | 0.0011 | 0.84  | 0.00177 | 0.00003     | 4227.5 | 148.3       | 792.2  | 40.7       | 118.0 | 7.6        | 7.3  |
| 11231A161     | Zagi   | 51.0                | 1224 | 51.99                         | 3.50 | 0.5216 | 0.0558      | 0.0552 | 1.2627 | 0.0915     | 0.0192 | 0.0013     | 0.0013 | 0.90  | 0.00175 | 0.00003     | 4303.5 | 156.0       | 829.1  | 41.1       | 122.8 | 8.3        | 8.0  |
| 11231A162     | Zagi   | 51.0                | 1281 | 53.93                         | 3.05 | 0.4913 | 0.0489      | 0.0483 | 1.1792 | 0.0920     | 0.0185 | 0.0010     | 0.0010 | 0.69  | 0.00169 | 0.00004     | 4215.3 | 145.7       | 790.9  | 42.9       | 118.4 | 6.7        | 6.3  |
| 11231A164     | Zagi   | 51.0                | 1347 | 56.32                         | 3.76 | 0.5022 | 0.0559      | 0.0553 | 1.1127 | 0.0776     | 0.0178 | 0.0012     | 0.0012 | 0.93  | 0.00175 | 0.00003     | 4247.8 | 163.0       | 759.5  | 37.3       | 113.5 | 7.6        | 7.3  |

| Analysis date      | Sample | Final U-Pb Age (Ma) | Th/U | Data for Tera-Wasserburg plot |              |        |              |            |             |            |        |              |            |            | Dates      |         |        |             |          |             |          |            |          |              |            |
|--------------------|--------|---------------------|------|-------------------------------|--------------|--------|--------------|------------|-------------|------------|--------|--------------|------------|------------|------------|---------|--------|-------------|----------|-------------|----------|------------|----------|--------------|------------|
|                    |        |                     |      | 238U/206Pb                    |              |        |              |            | 207Pb/206Pb |            |        | 207Pb/235U   |            | 206Pb/238U |            |         | rho    | 208Pb/232Th |          | 207Pb/206Pb |          | 207Pb/235U |          | 206Pb/238U   |            |
|                    |        |                     |      | Ratio                         | 2 $\sigma^*$ | Ratio  | 2 $\sigma^*$ | 2 $\sigma$ | Ratio       | 2 $\sigma$ | Ratio  | 2 $\sigma^*$ | 2 $\sigma$ | Ratio      | 2 $\sigma$ | Ratio   |        | 2 $\sigma$  | Age (Ma) | 2sigma      | Age (Ma) | 2 $\sigma$ | Age (Ma) | 2 $\sigma^*$ | 2 $\sigma$ |
| 11231A165          | Zagi   | 51.0                | 1364 | 55.81                         | 3.70         | 0.5051 | 0.0480       | 0.0473     | 1.1586      | 0.0808     | 0.0179 | 0.0012       | 0.0012     | 0.92       | 0.00178    | 0.00004 | 4256.5 | 138.6       | 781.3    | 38.0        | 114.5    | 7.6        | 7.3      |              |            |
| 11231A166          | Zagi   | 51.0                | 1431 | 51.78                         | 2.92         | 0.4880 | 0.0523       | 0.0518     | 1.2380      | 0.0877     | 0.0193 | 0.0011       | 0.0010     | 0.76       | 0.00177    | 0.00003 | 4205.4 | 157.4       | 818.0    | 39.8        | 123.3    | 6.9        | 6.6      |              |            |
| 11231A167          | Zagi   | 51.0                | 1402 | 55.69                         | 3.18         | 0.4637 | 0.0430       | 0.0424     | 1.1506      | 0.0811     | 0.0180 | 0.0010       | 0.0010     | 0.78       | 0.00175    | 0.00004 | 4131.5 | 135.9       | 777.5    | 38.3        | 114.7    | 6.6        | 6.2      |              |            |
| 11231A170          | Zagi   | 51.0                | 1543 | 49.29                         | 2.97         | 0.5159 | 0.0634       | 0.0629     | 1.2833      | 0.0791     | 0.0203 | 0.0012       | 0.0012     | 0.94       | 0.00172    | 0.00003 | 4287.4 | 180.1       | 838.3    | 35.2        | 129.5    | 7.8        | 7.4      |              |            |
| 11231A136          | Zagi   | 51.0                | 1503 | 52.37                         | 3.53         | 0.4005 | 0.0493       | 0.0489     | 1.0356      | 0.0937     | 0.0191 | 0.0013       | 0.0012     | 0.72       | 0.00167    | 0.00003 | 3911.0 | 184.6       | 721.7    | 46.7        | 121.9    | 8.2        | 7.9      |              |            |
| 11231A137          | Zagi   | 51.0                | 1490 | 57.24                         | 3.94         | 0.5146 | 0.0498       | 0.0492     | 1.1774      | 0.0822     | 0.0175 | 0.0012       | 0.0012     | 0.96       | 0.00177    | 0.00004 | 4283.6 | 141.2       | 790.1    | 38.3        | 111.6    | 7.7        | 7.4      |              |            |
| 11231A144          | Zagi   | 51.0                | 1426 | 56.46                         | 3.45         | 0.5638 | 0.0688       | 0.0682     | 1.2376      | 0.0935     | 0.0177 | 0.0011       | 0.0010     | 0.78       | 0.00173    | 0.00003 | 4417.6 | 177.7       | 817.8    | 42.4        | 113.2    | 6.9        | 6.6      |              |            |
| 11231A150          | Zagi   | 51.0                | 1243 | 61.64                         | 4.03         | 0.5127 | 0.0599       | 0.0594     | 1.0565      | 0.0761     | 0.0162 | 0.0011       | 0.0010     | 0.88       | 0.00179    | 0.00004 | 4278.1 | 171.3       | 732.1    | 37.6        | 103.7    | 6.8        | 6.5      |              |            |
| 11231A159          | Zagi   | 51.0                | 1094 | 58.38                         | 4.64         | 0.5220 | 0.0594       | 0.0589     | 1.0836      | 0.0813     | 0.0171 | 0.0014       | 0.0013     | 1.04       | 0.00181    | 0.00003 | 4304.7 | 166.4       | 745.4    | 39.6        | 109.5    | 8.7        | 8.4      |              |            |
| 11231A160          | Zagi   | 51.0                | 1157 | 53.79                         | 3.50         | 0.5526 | 0.0541       | 0.0534     | 1.3249      | 0.0848     | 0.0186 | 0.0012       | 0.0012     | 0.98       | 0.00177    | 0.00004 | 4388.0 | 142.7       | 856.6    | 37.1        | 118.7    | 7.7        | 7.4      |              |            |
| 11231A163          | Zagi   | 51.0                | 1300 | 60.65                         | 4.20         | 0.5553 | 0.0621       | 0.0615     | 1.1314      | 0.0914     | 0.0165 | 0.0011       | 0.0011     | 0.83       | 0.00179    | 0.00004 | 4395.4 | 162.8       | 768.4    | 43.5        | 105.4    | 7.3        | 7.1      |              |            |
| 11231A168          | Zagi   | 51.0                | 1582 | 55.41                         | 3.71         | 0.5209 | 0.0560       | 0.0554     | 1.1977      | 0.0701     | 0.0180 | 0.0012       | 0.0012     | 1.11       | 0.00178    | 0.00004 | 4301.6 | 157.0       | 799.5    | 32.4        | 115.3    | 7.7        | 7.4      |              |            |
| 11231A169          | Zagi   | 51.0                | 1616 | 51.67                         | 2.85         | 0.5385 | 0.0512       | 0.0506     | 1.4311      | 0.1008     | 0.0194 | 0.0011       | 0.0010     | 0.75       | 0.00176    | 0.00003 | 4350.3 | 138.0       | 902.0    | 42.1        | 123.6    | 6.8        | 6.4      |              |            |
| 11231A171          | Zagi   | 51.0                | 1446 | 50.00                         | 2.92         | 0.6015 | 0.0763       | 0.0757     | 1.5294      | 0.1056     | 0.0200 | 0.0012       | 0.0011     | 0.81       | 0.00171    | 0.00003 | 4511.7 | 183.8       | 942.3    | 42.4        | 127.6    | 7.5        | 7.1      |              |            |
| 24 $\mu$ m3J5Hz3N2 |        |                     |      |                               |              |        |              |            |             |            |        |              |            |            |            |         |        |             |          |             |          |            |          |              |            |
| 20102a13           | TPZ    | 425.2               | 61   | 14.30                         | 0.41         | 0.0910 | 0.0102       | 0.0101     | 0.8979      | 0.1146     | 0.0699 | 0.0020       | 0.0017     | 0.19       | 0.01824    | 0.0004  | 1446.6 | 211.9       | 650.6    | 61.3        | 435.8    | 12.5       | 10.0     |              |            |
| 20102a11           | TPZ    | 425.2               | 101  | 14.28                         | 0.41         | 0.1121 | 0.0047       | 0.0044     | 1.0815      | 0.0500     | 0.0700 | 0.0020       | 0.0017     | 0.51       | 0.01809    | 0.0004  | 1833.0 | 70.5        | 744.4    | 24.4        | 436.2    | 12.5       | 10.0     |              |            |
| 20102a34           | TPZ    | 425.2               | 137  | 14.11                         | 0.51         | 0.0714 | 0.0048       | 0.0047     | 0.6965      | 0.0517     | 0.0709 | 0.0026       | 0.0023     | 0.43       | 0.01861    | 0.0006  | 969.4  | 133.3       | 536.7    | 30.9        | 441.3    | 15.9       | 13.7     |              |            |
| 20102a9            | TPZ    | 425.2               | 93   | 14.32                         | 0.37         | 0.0810 | 0.0038       | 0.0036     | 0.7749      | 0.0331     | 0.0698 | 0.0018       | 0.0014     | 0.48       | 0.01873    | 0.0004  | 1220.4 | 87.0        | 582.6    | 18.9        | 435.1    | 11.4       | 8.6      |              |            |
| 20102a8            | TPZ    | 425.2               | 84   | 14.09                         | 0.38         | 0.0860 | 0.0028       | 0.0025     | 0.8398      | 0.0279     | 0.0710 | 0.0019       | 0.0015     | 0.64       | 0.01966    | 0.0004  | 1338.9 | 55.6        | 619.0    | 15.4        | 442.0    | 11.8       | 9.0      |              |            |
| 20102a33           | TPZ    | 425.2               | 210  | 13.88                         | 0.39         | 0.0832 | 0.0044       | 0.0042     | 0.8178      | 0.0401     | 0.0721 | 0.0020       | 0.0016     | 0.47       | 0.01966    | 0.0005  | 1275.9 | 100.0       | 606.8    | 22.4        | 448.6    | 12.6       | 9.9      |              |            |
| 20102a58           | TPZ    | 425.2               | 123  | 13.64                         | 0.42         | 0.1183 | 0.0070       | 0.0067     | 1.1996      | 0.0817     | 0.0733 | 0.0022       | 0.0019     | 0.38       | 0.02015    | 0.0004  | 1931.5 | 101.9       | 800.4    | 37.7        | 456.2    | 14.0       | 11.5     |              |            |
| 20102a69           | TPZ    | 425.2               | 260  | 12.31                         | 0.46         | 0.1722 | 0.0086       | 0.0081     | 1.9114      | 0.0992     | 0.0812 | 0.0031       | 0.0028     | 0.65       | 0.02019    | 0.0004  | 2578.7 | 79.8        | 1085.1   | 34.6        | 503.5    | 18.9       | 16.5     |              |            |
| 20102a47           | TPZ    | 425.2               | 122  | 14.51                         | 0.39         | 0.0757 | 0.0035       | 0.0033     | 0.7139      | 0.0310     | 0.0689 | 0.0019       | 0.0015     | 0.50       | 0.02018    | 0.0005  | 1087.0 | 88.1        | 547.1    | 18.4        | 429.6    | 11.6       | 9.0      |              |            |
| 20102a70           | TPZ    | 425.2               | 148  | 13.90                         | 0.42         | 0.0870 | 0.0049       | 0.0048     | 0.8534      | 0.0437     | 0.0719 | 0.0022       | 0.0018     | 0.49       | 0.02053    | 0.0004  | 1361.1 | 105.6       | 626.5    | 24.0        | 447.8    | 13.4       | 11.0     |              |            |
| 20102a71           | TPZ    | 425.2               | 159  | 14.21                         | 0.37         | 0.0739 | 0.0032       | 0.0030     | 0.7121      | 0.0267     | 0.0704 | 0.0018       | 0.0015     | 0.55       | 0.02056    | 0.0004  | 1038.9 | 81.5        | 546.0    | 15.8        | 438.3    | 11.5       | 8.7      |              |            |
| 20102a57           | TPZ    | 425.2               | 99   | 13.88                         | 0.35         | 0.0877 | 0.0047       | 0.0045     | 0.8679      | 0.0456     | 0.0721 | 0.0018       | 0.0014     | 0.36       | 0.02095    | 0.0004  | 1375.9 | 99.2        | 634.4    | 24.8        | 448.5    | 11.2       | 8.2      |              |            |
| 20102a46           | TPZ    | 425.2               | 57   | 14.32                         | 0.35         | 0.0734 | 0.0031       | 0.0029     | 0.7018      | 0.0256     | 0.0699 | 0.0017       | 0.0013     | 0.51       | 0.02126    | 0.0005  | 1027.8 | 80.7        | 539.9    | 15.3        | 435.3    | 10.8       | 7.9      |              |            |
| 20111A33           | TPZ    | 408.8               | 1548 | 2.05                          | 0.32         | 0.7685 | 0.0809       | 0.0800     | 47.6704     | 8.7647     | 0.4882 | 0.0754       | 0.0750     | 0.84       | 0.00744    | 0.0002  | error  | 3944.8      | 182.9    | 2562.9      | 395.9    | 324.9      |          |              |            |

| Analysis date | Sample | Final U-Pb Age (Ma) | Th/U | Data for Tera-Wasserburg plot |              |        |              |            |             |            |        |              |            |            | Dates      |          |        |             |          |             |          |              |            |            |  |  |
|---------------|--------|---------------------|------|-------------------------------|--------------|--------|--------------|------------|-------------|------------|--------|--------------|------------|------------|------------|----------|--------|-------------|----------|-------------|----------|--------------|------------|------------|--|--|
|               |        |                     |      | 238U/206Pb                    |              |        |              |            | 207Pb/206Pb |            |        | 207Pb/235U   |            | 206Pb/238U |            |          | rho    | 208Pb/232Th |          | 207Pb/206Pb |          | 207Pb/235U   |            | 206Pb/238U |  |  |
|               |        |                     |      | Ratio                         | 2 $\sigma^*$ | Ratio  | 2 $\sigma^*$ | 2 $\sigma$ | Ratio       | 2 $\sigma$ | Ratio  | 2 $\sigma^*$ | 2 $\sigma$ | Ratio      | 2 $\sigma$ | Age (Ma) |        | 2sigma      | Age (Ma) | 2 $\sigma$  | Age (Ma) | 2 $\sigma^*$ | 2 $\sigma$ |            |  |  |
| 20111A11      | TPZ    | 408.8               | 584  | 7.89                          | 0.51         | 0.4487 | 0.0203       | 0.0191     | 7.7960      | 0.5498     | 0.1267 | 0.0081       | 0.0079     | 0.88       | 0.01522    | 0.0004   | 4080.8 | 63.5        | 2207.7   | 63.5        | 769.1    | 49.4         | 45.1       |            |  |  |
| 20111A40      | TPZ    | 408.8               | 643  | 7.85                          | 0.62         | 0.4545 | 0.0341       | 0.0333     | 8.5944      | 1.0308     | 0.1273 | 0.0100       | 0.0098     | 0.64       | 0.01596    | 0.0003   | 4101.9 | 109.3       | 2296.0   | 109.1       | 772.6    | 60.9         | 56.2       |            |  |  |
| 20111A12      | TPZ    | 408.8               | 218  | 11.03                         | 0.47         | 0.2685 | 0.0124       | 0.0117     | 3.3621      | 0.2434     | 0.0906 | 0.0038       | 0.0035     | 0.54       | 0.01610    | 0.0002   | 3297.2 | 68.2        | 1495.6   | 56.7        | 559.3    | 23.6         | 20.9       |            |  |  |
| 20111A13      | TPZ    | 408.8               | 116  | 9.94                          | 0.46         | 0.3655 | 0.0195       | 0.0187     | 5.2294      | 0.4591     | 0.1006 | 0.0047       | 0.0044     | 0.50       | 0.01786    | 0.0003   | 3773.2 | 77.8        | 1857.4   | 74.8        | 617.9    | 28.9         | 25.8       |            |  |  |
| 20111A35      | TPZ    | 408.8               | 306  | 15.46                         | 0.59         | 0.0600 | 0.0055       | 0.0054     | 0.5196      | 0.0447     | 0.0647 | 0.0024       | 0.0022     | 0.40       | 0.01902    | 0.0004   | 611.1  | 196.3       | 424.9    | 29.8        | 404.0    | 15.3         | 13.4       |            |  |  |
| 20111A34      | TPZ    | 408.8               | 393  | 14.39                         | 0.55         | 0.0862 | 0.0068       | 0.0066     | 0.8166      | 0.0550     | 0.0695 | 0.0026       | 0.0024     | 0.51       | 0.01908    | 0.0003   | 1342.6 | 148.3       | 606.1    | 30.7        | 433.0    | 16.4         | 14.4       |            |  |  |
| 20111A8       | TPZ    | 408.8               | 87   | 14.58                         | 0.52         | 0.1195 | 0.0119       | 0.0118     | 1.1282      | 0.1336     | 0.0686 | 0.0024       | 0.0022     | 0.27       | 0.01923    | 0.0004   | 1950.0 | 177.9       | 766.9    | 63.7        | 427.7    | 15.2         | 13.1       |            |  |  |
| 20111A18      | TPZ    | 408.8               | 190  | 13.64                         | 0.43         | 0.1510 | 0.0114       | 0.0112     | 1.5088      | 0.1135     | 0.0733 | 0.0023       | 0.0020     | 0.37       | 0.01929    | 0.0003   | 2356.5 | 126.2       | 933.9    | 45.9        | 456.0    | 14.5         | 12.1       |            |  |  |
| 20111A21      | TPZ    | 408.8               | 84   | 14.62                         | 0.44         | 0.1082 | 0.0070       | 0.0068     | 1.0176      | 0.0619     | 0.0684 | 0.0021       | 0.0017     | 0.42       | 0.01957    | 0.0004   | 1768.8 | 115.0       | 712.7    | 31.2        | 426.5    | 12.8         | 10.4       |            |  |  |
| 20111A16      | TPZ    | 408.8               | 254  | 14.68                         | 0.40         | 0.0742 | 0.0038       | 0.0036     | 0.6930      | 0.0270     | 0.0681 | 0.0018       | 0.0015     | 0.56       | 0.01971    | 0.0003   | 1055.6 | 98.2        | 534.6    | 16.2        | 424.7    | 11.5         | 8.9        |            |  |  |
| 20111A42      | TPZ    | 408.8               | 596  | 14.58                         | 0.61         | 0.0811 | 0.0078       | 0.0077     | 0.7224      | 0.0608     | 0.0686 | 0.0029       | 0.0026     | 0.46       | 0.01988    | 0.0004   | 1233.3 | 186.0       | 552.1    | 35.8        | 427.7    | 17.9         | 15.9       |            |  |  |
| 20111A31      | TPZ    | 408.8               | 128  | 15.14                         | 0.48         | 0.0748 | 0.0040       | 0.0039     | 0.6853      | 0.0312     | 0.0660 | 0.0021       | 0.0018     | 0.60       | 0.02010    | 0.0003   | 1062.7 | 104.8       | 530.0    | 18.8        | 412.3    | 13.1         | 10.9       |            |  |  |
| 20111A32      | TPZ    | 408.8               | 54   | 14.65                         | 0.43         | 0.0761 | 0.0039       | 0.0038     | 0.7254      | 0.0325     | 0.0683 | 0.0020       | 0.0017     | 0.55       | 0.02025    | 0.0004   | 1098.2 | 100.0       | 553.9    | 19.1        | 425.7    | 12.5         | 10.1       |            |  |  |
| 20111A41      | TPZ    | 408.8               | 538  | 13.27                         | 0.56         | 0.1291 | 0.0105       | 0.0103     | 1.2753      | 0.0738     | 0.0753 | 0.0032       | 0.0030     | 0.68       | 0.02054    | 0.0004   | 2087.0 | 140.4       | 834.7    | 32.9        | 468.2    | 19.8         | 17.7       |            |  |  |
| 20111A48      | MNP    | 38.0                | 712  | 99.09                         | 8.25         | 0.4817 | 0.0918       | 0.0915     | 0.5154      | 0.0648     | 0.0101 | 0.0008       | 0.0008     | 0.65       | 0.00129    | 0.00003  | 4186.1 | 285.1       | 422.1    | 43.4        | 64.7     | 5.4          | 5.3        |            |  |  |
| 20111A50      | MNP    | 38.0                | 589  | 127.40                        | 8.38         | 0.3143 | 0.0396       | 0.0393     | 0.2896      | 0.0243     | 0.0078 | 0.0005       | 0.0005     | 0.76       | 0.00130    | 0.00003  | 3542.3 | 194.6       | 258.2    | 19.1        | 50.4     | 3.3          | 3.2        |            |  |  |
| 20111A52      | MNP    | 38.0                | 383  | 104.77                        | 7.90         | 0.3221 | 0.0541       | 0.0539     | 0.3606      | 0.0381     | 0.0095 | 0.0007       | 0.0007     | 0.70       | 0.00135    | 0.00003  | 3579.9 | 260.2       | 312.7    | 28.4        | 61.2     | 4.6          | 4.5        |            |  |  |
| 20111A54      | MNP    | 38.0                | 584  | 94.61                         | 7.64         | 0.3721 | 0.0516       | 0.0512     | 0.4843      | 0.0522     | 0.0106 | 0.0009       | 0.0008     | 0.73       | 0.00132    | 0.00003  | 3811.1 | 209.2       | 401.0    | 35.7        | 67.8     | 5.5          | 5.3        |            |  |  |
| 20111A56      | MNP    | 38.0                | 670  | 107.09                        | 8.10         | 0.3677 | 0.0462       | 0.0459     | 0.4069      | 0.0354     | 0.0093 | 0.0007       | 0.0007     | 0.85       | 0.00133    | 0.00003  | 3783.3 | 190.2       | 346.6    | 25.6        | 59.9     | 4.5          | 4.4        |            |  |  |
| 20111A57      | MNP    | 38.0                | 577  | 103.14                        | 7.21         | 0.4030 | 0.0641       | 0.0638     | 0.4639      | 0.0464     | 0.0097 | 0.0007       | 0.0007     | 0.68       | 0.00134    | 0.00003  | 3920.2 | 240.4       | 386.9    | 32.2        | 62.2     | 4.3          | 4.2        |            |  |  |
| 20111A58      | MNP    | 38.0                | 610  | 98.10                         | 7.60         | 0.4591 | 0.0972       | 0.0970     | 0.5092      | 0.0471     | 0.0102 | 0.0008       | 0.0008     | 0.82       | 0.00134    | 0.00003  | 4116.7 | 319.1       | 417.9    | 31.7        | 65.4     | 5.1          | 4.9        |            |  |  |
| 20111A60      | MNP    | 38.0                | 619  | 98.84                         | 8.39         | 0.3939 | 0.0714       | 0.0712     | 0.4758      | 0.0617     | 0.0101 | 0.0009       | 0.0008     | 0.64       | 0.00134    | 0.00003  | 3885.8 | 275.8       | 395.2    | 42.5        | 64.9     | 5.5          | 5.4        |            |  |  |
| 20111A62      | MNP    | 38.0                | 647  | 79.75                         | 6.02         | 0.5409 | 0.0844       | 0.0839     | 0.7966      | 0.0703     | 0.0125 | 0.0009       | 0.0009     | 0.84       | 0.00132    | 0.00003  | 4357.1 | 229.3       | 594.9    | 39.7        | 80.3     | 6.1          | 5.9        |            |  |  |
| 20111A68      | MNP    | 38.0                | 727  | 109.09                        | 8.34         | 0.3256 | 0.0434       | 0.0431     | 0.3906      | 0.0424     | 0.0092 | 0.0007       | 0.0007     | 0.69       | 0.00133    | 0.00003  | 3598.2 | 204.6       | 334.8    | 30.9        | 58.8     | 4.5          | 4.4        |            |  |  |
| 20111A69      | MNP    | 38.0                | 736  | 111.36                        | 7.47         | 0.3882 | 0.0578       | 0.0575     | 0.4431      | 0.0495     | 0.0090 | 0.0006       | 0.0006     | 0.58       | 0.00132    | 0.00003  | 3864.1 | 225.5       | 372.4    | 34.8        | 57.6     | 3.9          | 3.7        |            |  |  |
| 20111A71      | MNP    | 38.0                | 532  | 103.50                        | 8.21         | 0.3197 | 0.0480       | 0.0477     | 0.3870      | 0.0453     | 0.0097 | 0.0008       | 0.0008     | 0.66       | 0.00132    | 0.00003  | 3568.2 | 231.9       | 332.2    | 33.1        | 62.0     | 4.9          | 4.8        |            |  |  |
| 20111A73      | MNP    | 38.0                | 730  | 106.16                        | 7.44         | 0.4233 | 0.1740       | 0.1739     | 0.3888      | 0.0391     | 0.0094 | 0.0007       | 0.0006     | 0.68       | 0.00135    | 0.00003  | 3994.1 | 660.0       | 333.5    | 28.6        | 60.4     | 4.2          | 4.1        |            |  |  |
| 20111A74      | MNP    | 38.0                | 796  | 105.25                        | 6.66         | 0.3293 | 0.0445       | 0.0442     | 0.3822      | 0.0365     | 0.0095 | 0.0006       | 0.0006     | 0.64       | 0.00133    | 0.00003  | 3613.9 | 207.4       | 328.7    | 26.8        | 61.0     | 3.9          | 3.7        |            |  |  |
| 20111A75      | MNP    | 38.0                | 541  | 103.54                        | 7.00         | 0.3245 | 0.0470       | 0.0467     | 0.3672      | 0.0358     | 0.0097 | 0.0007       | 0.0006     | 0.67       | 0.00134    | 0.00003  | 3591.7 | 223.6       | 317.6    | 26.6        | 62.0     | 4.2          | 4.1        |            |  |  |

| Analysis date | Sample | Final U-Pb Age (Ma) | Th/U | Data for Tera-Wasserburg plot |              |        |             |              |            |            |            |            | rho    | 208Pb/232Th  |             |         | Dates      |          |            |          |            |          |              |
|---------------|--------|---------------------|------|-------------------------------|--------------|--------|-------------|--------------|------------|------------|------------|------------|--------|--------------|-------------|---------|------------|----------|------------|----------|------------|----------|--------------|
|               |        |                     |      | 238U/206Pb                    |              |        | 207Pb/206Pb |              |            | 207Pb/235U |            | 206Pb/238U |        |              | 207Pb/206Pb |         | 207Pb/235U |          | 206Pb/238U |          |            |          |              |
|               |        |                     |      | Ratio                         | 2 $\sigma^*$ |        | Ratio       | 2 $\sigma^*$ | 2 $\sigma$ | Ratio      | 2 $\sigma$ | Ratio      |        | 2 $\sigma^*$ | 2 $\sigma$  | Ratio   | 2 $\sigma$ | Age (Ma) | 2sigma     | Age (Ma) | 2 $\sigma$ | Age (Ma) | 2 $\sigma^*$ |
| 20111A76      | MNP    | 38.0                | 601  | 53.40                         | 6.02         | 0.6267 | 0.0730      | 0.0723       | 1.5336     | 0.2293     | 0.0187     | 0.0021     | 0.0021 | 0.75         | 0.00133     | 0.00004 | 4571.3     | 176.8    | 944.0      | 91.9     | 119.6      | 13.5     | 13.2         |
| 20111A77      | MNP    | 38.0                | 629  | 81.82                         | 6.33         | 0.4663 | 0.0669      | 0.0666       | 0.6776     | 0.0629     | 0.0122     | 0.0009     | 0.0009 | 0.81         | 0.00131     | 0.00003 | 4138.0     | 213.3    | 525.3      | 38.1     | 78.3       | 6.1      | 5.9          |
| 20111A78      | MNP    | 38.0                | 724  | 112.32                        | 7.53         | 0.3850 | 0.0708      | 0.0706       | 0.3963     | 0.0385     | 0.0089     | 0.0006     | 0.0006 | 0.67         | 0.00129     | 0.00004 | 3851.6     | 280.3    | 339.0      | 28.0     | 57.1       | 3.8      | 3.7          |
| 20111A79      | MNP    | 38.0                | 673  | 116.84                        | 7.52         | 0.2640 | 0.0326      | 0.0323       | 0.2878     | 0.0339     | 0.0086     | 0.0006     | 0.0005 | 0.53         | 0.00135     | 0.00004 | 3270.9     | 193.8    | 256.8      | 26.7     | 54.9       | 3.5      | 3.4          |
| 20111A80      | MNP    | 38.0                | 644  | 103.21                        | 7.41         | 0.3272 | 0.0432      | 0.0429       | 0.3931     | 0.0360     | 0.0097     | 0.0007     | 0.0007 | 0.76         | 0.00135     | 0.00004 | 3605.6     | 202.5    | 336.7      | 26.2     | 62.2       | 4.5      | 4.3          |
| 20111A81      | MNP    | 38.0                | 623  | 106.31                        | 7.91         | 0.3469 | 0.0482      | 0.0479       | 0.3950     | 0.0389     | 0.0094     | 0.0007     | 0.0007 | 0.74         | 0.00134     | 0.00004 | 3693.5     | 212.2    | 338.0      | 28.3     | 60.4       | 4.5      | 4.4          |
| 20111A82      | MNP    | 38.0                | 617  | 114.31                        | 7.33         | 0.3258 | 0.0529      | 0.0527       | 0.3499     | 0.0376     | 0.0087     | 0.0006     | 0.0005 | 0.58         | 0.00131     | 0.00004 | 3597.2     | 250.9    | 304.7      | 28.3     | 56.2       | 3.6      | 3.5          |
| 20111A49      | MNP    | 38.0                | 608  | 28.92                         | 7.55         | 0.6160 | 0.1001      | 0.0997       | 3.3263     | 0.9905     | 0.0346     | 0.0090     | 0.0090 | 0.87         | 0.00143     | 0.00006 | 4546.1     | 257.6    | 1487.2     | 232.5    | 219.1      | 57.2     | 56.1         |
| 20111A51      | MNP    | 38.0                | 567  | 37.63                         | 1.66         | 0.7471 | 0.0433      | 0.0417       | 2.6503     | 0.1031     | 0.0266     | 0.0012     | 0.0011 | 1.06         | 0.00148     | 0.00004 | error      | error    | 1314.7     | 28.7     | 169.1      | 7.5      | 6.9          |
| 20111A53      | MNP    | 38.0                | 357  | 139.54                        | 10.75        | 0.3805 | 0.0638      | 0.0635       | 0.3162     | 0.0357     | 0.0072     | 0.0006     | 0.0005 | 0.67         | 0.00136     | 0.00003 | 3835.2     | 255.0    | 279.0      | 27.6     | 46.0       | 3.5      | 3.5          |
| 20111A55      | MNP    | 38.0                | 481  | 32.50                         | 5.92         | 0.6133 | 0.0582      | 0.0574       | 3.0718     | 0.6763     | 0.0308     | 0.0056     | 0.0056 | 0.82         | 0.00140     | 0.00004 | 4539.9     | 136.3    | 1425.7     | 168.7    | 195.4      | 35.6     | 34.9         |
| 20111A59      | MNP    | 38.0                | 322  | 26.14                         | 1.34         | 0.7845 | 0.0327      | 0.0303       | 3.9993     | 0.2101     | 0.0383     | 0.0020     | 0.0019 | 0.92         | 0.00160     | 0.00003 | error      | error    | 1634.1     | 42.7     | 242.0      | 12.4     | 11.5         |
| 20111A61      | MNP    | 38.0                | 315  | 24.83                         | 1.04         | 0.7774 | 0.0361      | 0.0340       | 4.3428     | 0.1558     | 0.0403     | 0.0017     | 0.0016 | 1.07         | 0.00162     | 0.00004 | error      | error    | 1701.5     | 29.6     | 254.6      | 10.6     | 9.6          |
| 20111A70      | MNP    | 38.0                | 773  | 87.37                         | 6.54         | 0.3958 | 0.0758      | 0.0755       | 0.5138     | 0.0543     | 0.0114     | 0.0009     | 0.0008 | 0.69         | 0.00132     | 0.00003 | 3893.5     | 291.4    | 421.0      | 36.4     | 73.4       | 5.5      | 5.3          |
| 20111A72      | MNP    | 38.0                | 689  | 67.68                         | 5.95         | 0.5099 | 0.0538      | 0.0533       | 0.9005     | 0.0828     | 0.0148     | 0.0013     | 0.0013 | 0.94         | 0.00133     | 0.00003 | 4270.1     | 154.3    | 652.0      | 44.2     | 94.6       | 8.3      | 8.1          |
| 20111A100     | Tribal | 41.5                | 216  | 98.03                         | 8.26         | 0.3977 | 0.0681      | 0.0678       | 0.4571     | 0.0433     | 0.0102     | 0.0009     | 0.0008 | 0.87         | 0.00216     | 0.0001  | 3900.5     | 259.3    | 382.2      | 30.2     | 65.4       | 5.5      | 5.4          |
| 20111A101     | Tribal | 41.5                | 172  | 105.97                        | 8.00         | 0.3074 | 0.0419      | 0.0416       | 0.3612     | 0.0313     | 0.0094     | 0.0007     | 0.0007 | 0.85         | 0.00225     | 0.0001  | 3509.3     | 210.8    | 313.1      | 23.4     | 60.5       | 4.6      | 4.4          |
| 20111A102     | Tribal | 41.5                | 166  | 102.93                        | 7.63         | 0.3026 | 0.0361      | 0.0358       | 0.3833     | 0.0381     | 0.0097     | 0.0007     | 0.0007 | 0.73         | 0.00222     | 0.0001  | 3483.6     | 184.0    | 329.5      | 27.9     | 62.3       | 4.6      | 4.5          |
| 20111A108     | Tribal | 41.5                | 443  | 95.47                         | 6.41         | 0.3543 | 0.0463      | 0.0459       | 0.4588     | 0.0438     | 0.0105     | 0.0007     | 0.0007 | 0.68         | 0.00204     | 0.0001  | 3725.6     | 198.6    | 383.4      | 30.5     | 67.2       | 4.5      | 4.4          |
| 20111A109     | Tribal | 41.5                | 450  | 98.76                         | 6.46         | 0.2532 | 0.0383      | 0.0381       | 0.3183     | 0.0376     | 0.0101     | 0.0007     | 0.0006 | 0.54         | 0.00196     | 0.0001  | 3205.3     | 239.0    | 280.6      | 29.0     | 64.9       | 4.2      | 4.1          |
| 20111A110     | Tribal | 41.5                | 458  | 102.94                        | 8.16         | 0.3099 | 0.0488      | 0.0486       | 0.3471     | 0.0375     | 0.0097     | 0.0008     | 0.0008 | 0.72         | 0.00198     | 0.0001  | 3520.7     | 244.4    | 302.5      | 28.3     | 62.3       | 4.9      | 4.8          |
| 20111A111     | Tribal | 41.5                | 448  | 102.11                        | 7.15         | 0.2845 | 0.0475      | 0.0473       | 0.3508     | 0.0390     | 0.0098     | 0.0007     | 0.0007 | 0.61         | 0.00200     | 0.0001  | 3388.0     | 262.0    | 305.3      | 29.3     | 62.8       | 4.4      | 4.3          |
| 20111A112     | Tribal | 41.5                | 448  | 96.99                         | 6.82         | 0.3110 | 0.0462      | 0.0459       | 0.3931     | 0.0413     | 0.0103     | 0.0007     | 0.0007 | 0.65         | 0.00203     | 0.0000  | 3527.8     | 229.8    | 336.7      | 30.1     | 66.1       | 4.6      | 4.5          |
| 20111A113     | Tribal | 41.5                | 313  | 77.15                         | 5.53         | 0.4190 | 0.0542      | 0.0538       | 0.6441     | 0.0619     | 0.0130     | 0.0009     | 0.0009 | 0.73         | 0.00204     | 0.0001  | 3978.7     | 193.4    | 504.8      | 38.2     | 83.0       | 5.9      | 5.8          |
| 20111A114     | Tribal | 41.5                | 306  | 87.53                         | 6.80         | 0.4262 | 0.0512      | 0.0508       | 0.6166     | 0.0640     | 0.0114     | 0.0009     | 0.0009 | 0.73         | 0.00203     | 0.0001  | 4004.3     | 179.2    | 487.7      | 40.2     | 73.2       | 5.7      | 5.5          |
| 20111A115     | Tribal | 41.5                | 235  | 93.78                         | 7.36         | 0.4242 | 0.0963      | 0.0961       | 0.5074     | 0.0525     | 0.0107     | 0.0008     | 0.0008 | 0.74         | 0.00193     | 0.0001  | 3997.2     | 345.9    | 416.7      | 35.3     | 68.4       | 5.4      | 5.2          |
| 20111A116     | Tribal | 41.5                | 110  | 114.10                        | 6.98         | 0.2432 | 0.0276      | 0.0273       | 0.2727     | 0.0243     | 0.0088     | 0.0005     | 0.0005 | 0.66         | 0.00217     | 0.0001  | 3142.6     | 179.3    | 244.9      | 19.4     | 56.3       | 3.4      | 3.3          |
| 20111A117     | Tribal | 41.5                | 163  | 119.15                        | 8.89         | 0.2286 | 0.0530      | 0.0528       | 0.2101     | 0.0282     | 0.0084     | 0.0006     | 0.0006 | 0.54         | 0.00184     | 0.0001  | 3042.3     | 379.8    | 193.6      | 23.6     | 53.9       | 4.0      | 3.9          |
| 20111A118     | Tribal | 41.5                | 346  | 123.83                        | 9.75         | 0.2385 | 0.0464      | 0.0462       | 0.2295     | 0.0328     | 0.0081     | 0.0006     | 0.0006 | 0.54         | 0.00189     | 0.0000  | 3110.2     | 314.4    | 209.8      | 27.1     | 51.8       | 4.1      | 4.0          |

| Analysis date | Sample | Final U-Pb Age (Ma) | Th/U | Data for Tera-Wasserburg plot |              |        |              |            |             |            |        |              |            |            | Dates      |          |        |             |          |             |          |              |            |            |  |
|---------------|--------|---------------------|------|-------------------------------|--------------|--------|--------------|------------|-------------|------------|--------|--------------|------------|------------|------------|----------|--------|-------------|----------|-------------|----------|--------------|------------|------------|--|
|               |        |                     |      | 238U/206Pb                    |              |        |              |            | 207Pb/206Pb |            |        | 207Pb/235U   |            | 206Pb/238U |            |          | rho    | 208Pb/232Th |          | 207Pb/206Pb |          | 207Pb/235U   |            | 206Pb/238U |  |
|               |        |                     |      | Ratio                         | 2 $\sigma^*$ | Ratio  | 2 $\sigma^*$ | 2 $\sigma$ | Ratio       | 2 $\sigma$ | Ratio  | 2 $\sigma^*$ | 2 $\sigma$ | Ratio      | 2 $\sigma$ | Age (Ma) |        | 2sigma      | Age (Ma) | 2 $\sigma$  | Age (Ma) | 2 $\sigma^*$ | 2 $\sigma$ |            |  |
|               |        |                     |      |                               |              |        |              |            |             |            |        |              |            |            |            |          |        |             |          |             |          |              |            |            |  |
| 20111A119     | Tribal | 41.5                | 375  | 107.72                        | 8.70         | 0.3075 | 0.0449       | 0.0447     | 0.3405      | 0.0361     | 0.0093 | 0.0007       | 0.0007     | 0.75       | 0.00181    | 0.0000   | 3508.3 | 226.2       | 297.5    | 27.4        | 59.6     | 4.8          | 4.7        |            |  |
| 20111A120     | Tribal | 41.5                | 591  | 102.49                        | 9.72         | 0.1675 | 0.1685       | 0.1685     | 0.2563      | 0.0439     | 0.0098 | 0.0009       | 0.0009     | 0.55       | 0.00177    | 0.0000   | 2533.0 | 1122.5      | 231.7    | 35.5        | 62.6     | 5.9          | 5.8        |            |  |
| 20111A121     | Tribal | 41.5                | 1301 | 101.04                        | 11.25        | 0.1843 | 0.1521       | 0.1521     | 0.2394      | 0.0680     | 0.0099 | 0.0011       | 0.0011     | 0.39       | 0.00162    | 0.0000   | 2692.3 | 954.3       | 218.0    | 55.7        | 63.5     | 7.1          | 7.0        |            |  |
| 20111A88      | Tribal | 41.5                | 340  | 82.43                         | 6.81         | 0.4761 | 0.0687       | 0.0683     | 0.6805      | 0.0641     | 0.0121 | 0.0010       | 0.0010     | 0.86       | 0.00197    | 0.0001   | 4169.0 | 214.1       | 527.1    | 38.7        | 77.7     | 6.4          | 6.3        |            |  |
| 20111A89      | Tribal | 41.5                | 299  | 87.67                         | 7.53         | 0.4284 | 0.0579       | 0.0575     | 0.5799      | 0.0565     | 0.0114 | 0.0010       | 0.0010     | 0.87       | 0.00208    | 0.0001   | 4012.0 | 201.9       | 464.4    | 36.3        | 73.1     | 6.3          | 6.1        |            |  |
| 20111A90      | Tribal | 41.5                | 299  | 84.02                         | 6.91         | 0.4494 | 0.0733       | 0.0730     | 0.5814      | 0.0545     | 0.0119 | 0.0010       | 0.0010     | 0.86       | 0.00202    | 0.0001   | 4083.3 | 244.1       | 465.3    | 35.0        | 76.3     | 6.3          | 6.1        |            |  |
| 20111A91      | Tribal | 41.5                | 288  | 85.09                         | 6.99         | 0.4217 | 0.1276       | 0.1275     | 0.5315      | 0.0548     | 0.0118 | 0.0010       | 0.0009     | 0.78       | 0.00206    | 0.0001   | 3988.6 | 469.3       | 432.8    | 36.3        | 75.3     | 6.2          | 6.0        |            |  |
| 20111A92      | Tribal | 41.5                | 293  | 89.90                         | 6.98         | 0.4116 | 0.0514       | 0.0510     | 0.5384      | 0.0487     | 0.0111 | 0.0009       | 0.0008     | 0.84       | 0.00201    | 0.0001   | 3953.7 | 187.0       | 437.4    | 32.2        | 71.3     | 5.5          | 5.4        |            |  |
| 20111A93      | Tribal | 41.5                | 275  | 85.29                         | 6.37         | 0.3044 | 0.0403       | 0.0400     | 0.4452      | 0.0583     | 0.0117 | 0.0009       | 0.0009     | 0.56       | 0.00203    | 0.0001   | 3494.4 | 204.9       | 373.9    | 41.0        | 75.1     | 5.6          | 5.4        |            |  |
| 20111A94      | Tribal | 41.5                | 278  | 90.94                         | 6.86         | 0.4168 | 0.0630       | 0.0627     | 0.5643      | 0.0603     | 0.0110 | 0.0008       | 0.0008     | 0.69       | 0.00203    | 0.0001   | 3970.9 | 227.2       | 454.3    | 39.1        | 70.5     | 5.3          | 5.2        |            |  |
| 20111A95      | Tribal | 41.5                | 270  | 87.55                         | 6.88         | 0.3999 | 0.0638       | 0.0635     | 0.5461      | 0.0610     | 0.0114 | 0.0009       | 0.0009     | 0.69       | 0.00207    | 0.0001   | 3909.0 | 241.1       | 442.5    | 40.1        | 73.2     | 5.7          | 5.6        |            |  |
| 20111A96      | Tribal | 41.5                | 263  | 92.52                         | 7.89         | 0.5123 | 0.1214       | 0.1212     | 0.5806      | 0.0589     | 0.0108 | 0.0009       | 0.0009     | 0.83       | 0.00198    | 0.0001   | 4276.9 | 355.8       | 464.8    | 37.9        | 69.3     | 5.9          | 5.8        |            |  |
| 20111A97      | Tribal | 41.5                | 251  | 95.44                         | 8.01         | 0.3842 | 0.0589       | 0.0586     | 0.4951      | 0.0481     | 0.0105 | 0.0009       | 0.0009     | 0.85       | 0.00212    | 0.0001   | 3850.0 | 231.5       | 408.4    | 32.6        | 67.2     | 5.6          | 5.5        |            |  |
| 20111A98      | Tribal | 41.5                | 269  | 95.64                         | 7.54         | 0.4369 | 0.0611       | 0.0608     | 0.5426      | 0.0516     | 0.0105 | 0.0008       | 0.0008     | 0.81       | 0.00201    | 0.0001   | 4041.1 | 209.0       | 440.1    | 34.0        | 67.1     | 5.3          | 5.1        |            |  |
| 20111A99      | Tribal | 41.5                | 253  | 86.81                         | 6.98         | 0.3606 | 0.0539       | 0.0536     | 0.4956      | 0.0585     | 0.0115 | 0.0009       | 0.0009     | 0.67       | 0.00205    | 0.0001   | 3752.8 | 228.1       | 408.7    | 39.7        | 73.8     | 5.9          | 5.8        |            |  |
| 20111A122     | Tribal | 41.5                | 1461 | 83.64                         | 7.78         | 0.0563 | 0.1624       | 0.1624     | 0.2187      | 0.0539     | 0.0120 | 0.0011       | 0.0011     | 0.37       | 0.00159    | 0.0000   | 464.9  | 2506.4      | 200.8    | 44.9        | 76.6     | 7.1          | 7.0        |            |  |
| 20111A129     | Zagi   | 48.8                | 1490 | 53.86                         | 4.54         | 0.5290 | 0.0676       | 0.0671     | 1.1380      | 0.0987     | 0.0186 | 0.0016       | 0.0015     | 0.95       | 0.00171    | 0.00004  | 4324.0 | 187.2       | 771.6    | 46.9        | 118.6    | 10.0         | 9.7        |            |  |
| 20111A130     | Zagi   | 48.8                | 1522 | 54.42                         | 3.82         | 0.5414 | 0.0687       | 0.0682     | 1.2226      | 0.1089     | 0.0184 | 0.0013       | 0.0013     | 0.77       | 0.00172    | 0.00004  | 4358.3 | 185.5       | 811.0    | 49.8        | 117.4    | 8.2          | 7.9        |            |  |
| 20111A131     | Zagi   | 48.8                | 1491 | 55.20                         | 4.04         | 0.4788 | 0.0487       | 0.0481     | 1.1056      | 0.0874     | 0.0181 | 0.0013       | 0.0013     | 0.90       | 0.00173    | 0.00004  | 4177.5 | 149.3       | 756.0    | 42.1        | 115.7    | 8.5          | 8.2        |            |  |
| 20111A132     | Zagi   | 48.8                | 1555 | 50.41                         | 3.83         | 0.5087 | 0.0658       | 0.0653     | 1.1837      | 0.0933     | 0.0198 | 0.0015       | 0.0015     | 0.94       | 0.00170    | 0.00004  | 4333.3 | 190.2       | 793.1    | 43.4        | 126.6    | 9.6          | 9.3        |            |  |
| 20111A133     | Zagi   | 48.8                | 1499 | 53.00                         | 4.41         | 0.4866 | 0.0605       | 0.0600     | 1.1042      | 0.0994     | 0.0189 | 0.0016       | 0.0015     | 0.91       | 0.00173    | 0.00004  | 4201.2 | 183.1       | 755.4    | 48.0        | 120.5    | 10.0         | 9.8        |            |  |
| 20111A134     | Zagi   | 48.8                | 1484 | 54.96                         | 4.41         | 0.5173 | 0.0748       | 0.0744     | 1.0953      | 0.0982     | 0.0182 | 0.0015       | 0.0014     | 0.88       | 0.00173    | 0.00004  | 4291.7 | 213.1       | 751.1    | 47.6        | 116.2    | 9.3          | 9.0        |            |  |
| 20111A135     | Zagi   | 48.8                | 1474 | 54.47                         | 4.40         | 0.4783 | 0.0539       | 0.0534     | 1.0716      | 0.0890     | 0.0184 | 0.0015       | 0.0015     | 0.95       | 0.00176    | 0.00004  | 4175.6 | 165.9       | 739.5    | 43.6        | 117.3    | 9.5          | 9.2        |            |  |
| 20111A137     | Zagi   | 48.8                | 1511 | 56.14                         | 4.54         | 0.5131 | 0.0641       | 0.0636     | 1.1396      | 0.1057     | 0.0178 | 0.0014       | 0.0014     | 0.85       | 0.00176    | 0.00004  | 4279.4 | 183.3       | 772.3    | 50.2        | 113.8    | 9.2          | 8.9        |            |  |
| 20111A139     | Zagi   | 48.8                | 1520 | 52.10                         | 4.19         | 0.5204 | 0.0873       | 0.0869     | 1.1260      | 0.0924     | 0.0192 | 0.0015       | 0.0015     | 0.96       | 0.00177    | 0.00004  | 4301.9 | 247.0       | 765.9    | 44.1        | 122.6    | 9.9          | 9.6        |            |  |
| 20111A141     | Zagi   | 48.8                | 1529 | 54.05                         | 4.16         | 0.4453 | 0.0574       | 0.0569     | 1.0159      | 0.0901     | 0.0185 | 0.0014       | 0.0014     | 0.85       | 0.00170    | 0.00004  | 4069.6 | 191.7       | 711.9    | 45.4        | 118.2    | 9.1          | 8.8        |            |  |
| 20111A142     | Zagi   | 48.8                | 1517 | 57.88                         | 4.74         | 0.5063 | 0.0685       | 0.0680     | 1.0537      | 0.0967     | 0.0173 | 0.0014       | 0.0014     | 0.87       | 0.00171    | 0.00005  | 4259.7 | 199.2       | 730.7    | 47.8        | 110.4    | 9.0          | 8.8        |            |  |
| 20111A148     | Zagi   | 48.8                | 1547 | 53.24                         | 4.75         | 0.4666 | 0.0569       | 0.0565     | 1.0245      | 0.0937     | 0.0188 | 0.0017       | 0.0016     | 0.96       | 0.00175    | 0.00004  | 4139.2 | 181.3       | 716.2    | 47.0        | 120.0    | 10.7         | 10.4       |            |  |
| 20111A149     | Zagi   | 48.8                | 1525 | 52.50                         | 4.04         | 0.4620 | 0.0589       | 0.0584     | 1.0750      | 0.0905     | 0.0190 | 0.0015       | 0.0014     | 0.89       | 0.00173    | 0.00004  | 4124.4 | 188.9       | 741.2    | 44.3        | 121.6    | 9.4          | 9.1        |            |  |

| Analysis date | Sample | Final U-Pb Age (Ma) | Th/U | Data for Tera-Wasserburg plot |              |            |             |              |            |            |            |            |              |            | Dates   |             |            |             |        |            |            |            |              |
|---------------|--------|---------------------|------|-------------------------------|--------------|------------|-------------|--------------|------------|------------|------------|------------|--------------|------------|---------|-------------|------------|-------------|--------|------------|------------|------------|--------------|
|               |        |                     |      | 238U/206Pb                    |              |            | 207Pb/206Pb |              |            | 207Pb/235U |            | 206Pb/238U |              |            | rho     | 208Pb/232Th |            | 207Pb/206Pb |        | 207Pb/235U |            | 206Pb/238U |              |
|               |        |                     |      | Ratio                         | 2 $\sigma^*$ | 2 $\sigma$ | Ratio       | 2 $\sigma^*$ | 2 $\sigma$ | Ratio      | 2 $\sigma$ | Ratio      | 2 $\sigma^*$ | 2 $\sigma$ |         | Ratio       | 2 $\sigma$ | Age (Ma)    | 2sigma | Age (Ma)   | 2 $\sigma$ | Age (Ma)   | 2 $\sigma^*$ |
| 20111A150     | Zagi   | 48.8                | 1502 | 59.59                         | 4.77         | 0.4797     | 0.0564      | 0.0559       | 0.9842     | 0.0941     | 0.0168     | 0.0013     | 0.0013       | 0.82       | 0.00173 | 0.00004     | 4180.0     | 173.2       | 695.8  | 48.2       | 107.3      | 8.6        | 8.4          |
| 20111A154     | Zagi   | 48.8                | 1511 | 53.60                         | 4.02         | 0.4864     | 0.0664      | 0.0660       | 1.0781     | 0.1004     | 0.0187     | 0.0014     | 0.0014       | 0.79       | 0.00174 | 0.00004     | 4200.5     | 201.9       | 742.7  | 49.0       | 119.2      | 8.9        | 8.7          |
| 20111A155     | Zagi   | 48.8                | 1501 | 53.25                         | 4.13         | 0.5067     | 0.0677      | 0.0673       | 1.1129     | 0.0976     | 0.0188     | 0.0015     | 0.0014       | 0.86       | 0.00173 | 0.00004     | 4260.8     | 196.9       | 759.6  | 46.9       | 119.9      | 9.3        | 9.0          |
| 20111A157     | Zagi   | 48.8                | 1489 | 52.10                         | 3.80         | 0.4862     | 0.0678      | 0.0674       | 1.1408     | 0.1000     | 0.0192     | 0.0014     | 0.0014       | 0.81       | 0.00176 | 0.00004     | 4199.7     | 200.8       | 772.9  | 47.4       | 122.6      | 8.9        | 8.6          |
| 20111A158     | Zagi   | 48.8                | 1504 | 58.42                         | 4.45         | 0.5054     | 0.0791      | 0.0787       | 1.0241     | 0.0978     | 0.0171     | 0.0013     | 0.0013       | 0.78       | 0.00170 | 0.00004     | 4257.1     | 231.6       | 715.9  | 49.1       | 109.4      | 8.3        | 8.1          |
| 20111A159     | Zagi   | 48.8                | 1542 | 54.92                         | 4.71         | 0.6100     | 0.1275      | 0.1272       | 1.1971     | 0.1128     | 0.0182     | 0.0016     | 0.0015       | 0.89       | 0.00174 | 0.00004     | 4532.1     | 342.2       | 799.2  | 52.1       | 116.3      | 10.0       | 9.7          |
| 20111A160     | Zagi   | 48.8                | 1488 | 59.54                         | 5.02         | 0.5293     | 0.1081      | 0.1078       | 0.9939     | 0.1007     | 0.0168     | 0.0014     | 0.0014       | 0.82       | 0.00176 | 0.00005     | 4325.0     | 303.8       | 700.7  | 51.3       | 107.4      | 9.1        | 8.8          |
| 20111A162     | Zagi   | 48.8                | 1452 | 55.96                         | 4.61         | 0.4845     | 0.0653      | 0.0649       | 1.0510     | 0.1119     | 0.0179     | 0.0015     | 0.0014       | 0.76       | 0.00175 | 0.00004     | 4194.8     | 199.2       | 729.4  | 55.4       | 114.2      | 9.4        | 9.1          |
| 20111A128     | Zagi   | 48.8                | 1501 | 62.49                         | 4.50         | 0.5510     | 0.0705      | 0.0700       | 1.1869     | 0.0984     | 0.0160     | 0.0012     | 0.0011       | 0.84       | 0.00175 | 0.00004     | 4383.7     | 187.0       | 794.5  | 45.7       | 102.3      | 7.4        | 7.1          |
| 20111A136     | Zagi   | 48.8                | 1472 | 55.86                         | 4.21         | 0.5056     | 0.0592      | 0.0587       | 1.1094     | 0.0828     | 0.0179     | 0.0013     | 0.0013       | 0.99       | 0.00173 | 0.00004     | 4257.7     | 172.7       | 757.9  | 39.9       | 114.4      | 8.6        | 8.3          |
| 20111A140     | Zagi   | 48.8                | 1487 | 52.71                         | 4.11         | 0.4210     | 0.0571      | 0.0567       | 0.9845     | 0.0943     | 0.0190     | 0.0015     | 0.0014       | 0.80       | 0.00179 | 0.00004     | 3986.1     | 203.0       | 695.9  | 48.2       | 121.2      | 9.4        | 9.1          |
| 20111A151     | Zagi   | 48.8                | 1502 | 53.68                         | 4.03         | 0.5828     | 0.2259      | 0.2257       | 1.0706     | 0.0713     | 0.0186     | 0.0014     | 0.0014       | 1.10       | 0.00174 | 0.00004     | 4465.7     | 728.2       | 739.0  | 35.0       | 119.0      | 8.9        | 8.7          |
| 20111A152     | Zagi   | 48.8                | 1486 | 57.11                         | 4.54         | 0.5715     | 0.0903      | 0.0899       | 1.1458     | 0.1202     | 0.0175     | 0.0014     | 0.0014       | 0.74       | 0.00174 | 0.00004     | 4438.9     | 231.5       | 775.2  | 56.9       | 111.9      | 8.9        | 8.6          |
| 20111A153     | Zagi   | 48.8                | 1523 | 37.21                         | 2.71         | 0.6371     | 0.0647      | 0.0639       | 2.1346     | 0.1260     | 0.0269     | 0.0020     | 0.0019       | 1.21       | 0.00178 | 0.00004     | 4594.9     | 153.2       | 1160.1 | 40.8       | 171.0      | 12.5       | 12.0         |
| 20111A156     | Zagi   | 48.8                | 1536 | 57.97                         | 5.17         | 0.5874     | 0.0925      | 0.0921       | 1.1356     | 0.1023     | 0.0173     | 0.0015     | 0.0015       | 0.98       | 0.00174 | 0.00004     | 4477.1     | 230.2       | 770.4  | 48.6       | 110.3      | 9.8        | 9.6          |
| 20111A138     | Zagi   | 48.8                | 1472 | 59.59                         | 4.98         | 0.5655     | 0.0787      | 0.0782       | 1.1503     | 0.1022     | 0.0168     | 0.0014     | 0.0014       | 0.92       | 0.00176 | 0.00005     | 4421.9     | 203.2       | 777.4  | 48.3       | 107.3      | 9.0        | 8.7          |
| 20111A161     | Zagi   | 48.8                | 1465 | 63.42                         | 5.38         | 0.5301     | 0.0700      | 0.0695       | 1.0360     | 0.1089     | 0.0158     | 0.0013     | 0.0013       | 0.79       | 0.00179 | 0.00004     | 4327.5     | 193.5       | 721.9  | 54.3       | 100.8      | 8.6        | 8.3          |

Note: data and dates not corrected for common-Pb; Decay constants of Jaffey et al. (1971) used and a small number data were deleted due to abnormal ages, i.e., quite young or older and different from other data in the sample group.

---

---

| 208Pb/232Th |              |            |
|-------------|--------------|------------|
| Age<br>(Ma) | 2 $\sigma^*$ | 2 $\sigma$ |
| 365.1       | 9.4          | 7.6        |
| 368.2       | 9.0          | 7.1        |
| 379.7       | 10.0         | 8.1        |
| 389.1       | 10.5         | 8.7        |
| 391.6       | 8.5          | 6.0        |
| 413.0       | 12.2         | 10.4       |
| 437.5       | 10.8         | 8.5        |
| 31.3        | 0.9          | 0.8        |
| 26.8        | 0.7          | 0.5        |
| 26.4        | 0.7          | 0.6        |
| 26.2        | 0.7          | 0.6        |
| 26.3        | 0.6          | 0.5        |
| 27.6        | 0.9          | 0.8        |
| 26.6        | 0.7          | 0.5        |
| 34.6        | 0.9          | 0.7        |
| 25.5        | 0.7          | 0.6        |
| 26.3        | 0.7          | 0.6        |
| 26.6        | 0.7          | 0.6        |
| 26.8        | 0.7          | 0.6        |
| 26.6        | 0.7          | 0.6        |
| 26.9        | 0.7          | 0.6        |
| 27.5        | 0.8          | 0.6        |
| 26.9        | 0.7          | 0.6        |
| 27.4        | 0.8          | 0.7        |
| 27.6        | 0.8          | 0.7        |
| 30.2        | 0.8          | 0.7        |

---

---

---

208Pb/232Th

---

| Age<br>(Ma) | 2 $\sigma^*$ | 2 $\sigma$ |
|-------------|--------------|------------|
| 26.7        | 0.7          | 0.5        |
| 26.8        | 0.7          | 0.5        |
| 35.4        | 0.9          | 0.7        |
| 29.1        | 0.7          | 0.5        |
| 34.9        | 0.9          | 0.7        |
| 31.8        | 0.9          | 0.8        |
| 26.5        | 0.8          | 0.7        |
| 26.5        | 0.7          | 0.6        |
| 26.5        | 0.7          | 0.6        |
| 26.6        | 0.7          | 0.6        |
| 27.3        | 0.7          | 0.6        |
| 39.0        | 1.0          | 0.9        |
| 40.1        | 1.1          | 0.9        |
| 39.7        | 1.0          | 0.8        |
| 39.1        | 1.1          | 0.9        |
| 39.9        | 1.0          | 0.7        |
| 39.3        | 1.1          | 0.9        |
| 40.0        | 1.0          | 0.8        |
| 39.1        | 1.1          | 0.9        |
| 39.9        | 1.0          | 0.8        |
| 39.6        | 1.1          | 0.9        |
| 40.6        | 1.0          | 0.8        |
| 39.4        | 1.0          | 0.8        |
| 40.2        | 1.0          | 0.8        |
| 38.7        | 1.0          | 0.8        |
| 39.7        | 1.1          | 0.9        |
| 39.6        | 1.1          | 0.9        |
| 38.9        | 1.0          | 0.8        |
| 38.7        | 0.9          | 0.7        |

---



---

---

| 208Pb/232Th |              |            |
|-------------|--------------|------------|
| Age<br>(Ma) | 2 $\sigma^*$ | 2 $\sigma$ |
| 40.3        | 1.1          | 0.9        |
| 38.6        | 1.1          | 0.9        |
| 39.1        | 1.2          | 1.0        |
| 40.5        | 1.0          | 0.8        |
| 40.0        | 1.1          | 0.9        |
| 40.0        | 1.1          | 0.9        |
| 40.9        | 1.2          | 1.1        |
| 39.5        | 1.2          | 1.0        |
| 39.2        | 1.1          | 1.0        |
| 39.6        | 1.2          | 1.0        |
| 39.3        | 1.1          | 0.9        |
| 40.2        | 1.0          | 0.8        |
| 36.0        | 0.8          | 0.6        |
| 34.6        | 0.9          | 0.7        |
| 35.9        | 0.9          | 0.7        |
| 35.3        | 0.9          | 0.7        |
| 36.0        | 0.9          | 0.7        |
| 35.4        | 0.9          | 0.7        |
| 35.3        | 0.9          | 0.8        |
| 33.7        | 0.9          | 0.7        |
| 34.8        | 0.9          | 0.8        |
| 34.3        | 0.9          | 0.7        |
| 34.5        | 0.9          | 0.7        |
| 35.2        | 0.9          | 0.7        |
| 36.1        | 0.9          | 0.7        |
| 35.7        | 0.9          | 0.7        |
| 35.3        | 0.9          | 0.7        |
| 34.2        | 0.9          | 0.7        |
| 35.4        | 0.8          | 0.6        |

---

---

---

208Pb/232Th

---

| Age<br>(Ma) | 2 $\sigma^*$ | 2 $\sigma$ |
|-------------|--------------|------------|
| 35.8        | 0.9          | 0.7        |
| 35.7        | 0.9          | 0.7        |
| 35.4        | 0.9          | 0.7        |
| 34.7        | 0.8          | 0.7        |
| 33.8        | 0.9          | 0.7        |
| 35.8        | 0.9          | 0.7        |
| 35.0        | 0.9          | 0.7        |
| 36.1        | 0.9          | 0.7        |
| 36.5        | 0.9          | 0.7        |
| 35.7        | 0.9          | 0.8        |
| 36.1        | 0.9          | 0.7        |
| 36.0        | 0.9          | 0.7        |
| 35.6        | 0.8          | 0.6        |
| 34.5        | 0.9          | 0.7        |

---

|       |      |      |
|-------|------|------|
| 365.3 | 9.9  | 8.2  |
| 362.4 | 10.0 | 8.4  |
| 372.7 | 13.7 | 12.5 |
| 375.0 | 9.6  | 7.7  |
| 393.5 | 10.2 | 8.3  |
| 393.4 | 10.8 | 9.0  |
| 403.3 | 9.9  | 7.7  |
| 404.1 | 9.8  | 7.7  |
| 403.9 | 10.9 | 9.0  |
| 410.7 | 10.8 | 8.8  |
| 411.4 | 9.5  | 7.1  |
| 419.1 | 9.9  | 7.6  |
| 425.2 | 11.6 | 9.6  |
| 149.8 | 4.9  | 4.3  |

---

---

---

208Pb/232Th

---

| Age<br>(Ma) | 2 $\sigma^*$ | 2 $\sigma$ |
|-------------|--------------|------------|
| 305.4       | 9.1          | 7.8        |
| 320.0       | 7.2          | 5.3        |
| 322.8       | 6.8          | 4.7        |
| 357.8       | 8.4          | 6.4        |
| 380.8       | 9.2          | 7.2        |
| 382.1       | 8.6          | 6.3        |
| 385.1       | 9.9          | 8.0        |
| 386.3       | 8.9          | 6.7        |
| 391.7       | 9.2          | 7.0        |
| 394.5       | 8.3          | 5.8        |
| 397.9       | 9.5          | 7.4        |
| 402.3       | 9.0          | 6.6        |
| 405.3       | 9.5          | 7.2        |
| 410.9       | 9.6          | 7.3        |
| 26.1        | 0.8          | 0.7        |
| 26.3        | 0.7          | 0.6        |
| 27.2        | 0.8          | 0.7        |
| 26.7        | 0.8          | 0.7        |
| 26.9        | 0.8          | 0.7        |
| 27.1        | 0.8          | 0.7        |
| 27.0        | 0.7          | 0.6        |
| 27.0        | 0.7          | 0.6        |
| 26.7        | 0.8          | 0.7        |
| 26.8        | 0.8          | 0.7        |
| 26.6        | 0.8          | 0.7        |
| 26.8        | 0.8          | 0.6        |
| 27.4        | 0.8          | 0.7        |
| 26.9        | 0.7          | 0.6        |
| 27.1        | 0.7          | 0.6        |

---

---

---

| 208Pb/232Th |              |            |
|-------------|--------------|------------|
| Age<br>(Ma) | 2 $\sigma^*$ | 2 $\sigma$ |
| 26.9        | 0.8          | 0.7        |
| 26.5        | 0.8          | 0.7        |
| 26.0        | 0.8          | 0.7        |
| 27.2        | 0.8          | 0.7        |
| 27.3        | 0.8          | 0.7        |
| 27.1        | 0.9          | 0.8        |
| 26.4        | 0.9          | 0.8        |
| 29.0        | 1.2          | 1.1        |
| 29.9        | 0.8          | 0.7        |
| 27.5        | 0.7          | 0.6        |
| 28.3        | 0.9          | 0.8        |
| 32.3        | 0.9          | 0.7        |
| 32.8        | 0.9          | 0.7        |
| 26.6        | 0.7          | 0.6        |
| 27.0        | 0.8          | 0.7        |
| 43.6        | 1.8          | 1.6        |
| 45.5        | 2.0          | 1.9        |
| 44.8        | 1.9          | 1.8        |
| 41.2        | 1.3          | 1.1        |
| 39.7        | 1.2          | 1.1        |
| 40.1        | 1.2          | 1.1        |
| 40.3        | 1.2          | 1.0        |
| 41.0        | 1.2          | 1.0        |
| 41.1        | 1.2          | 1.0        |
| 41.0        | 1.4          | 1.3        |
| 39.0        | 1.4          | 1.2        |
| 43.8        | 1.6          | 1.5        |
| 37.1        | 1.4          | 1.2        |
| 38.1        | 1.0          | 0.9        |

---

---

---

208Pb/232Th

---

| Age<br>(Ma) | 2 $\sigma^*$ | 2 $\sigma$ |
|-------------|--------------|------------|
| 36.6        | 1.0          | 0.8        |
| 35.7        | 1.1          | 1.0        |
| 32.7        | 1.0          | 0.9        |
| 39.8        | 1.5          | 1.3        |
| 41.9        | 1.5          | 1.4        |
| 40.8        | 1.5          | 1.3        |
| 41.6        | 1.3          | 1.2        |
| 40.5        | 1.5          | 1.3        |
| 40.9        | 1.5          | 1.4        |
| 41.0        | 1.5          | 1.3        |
| 41.8        | 1.4          | 1.2        |
| 40.0        | 1.4          | 1.3        |
| 42.8        | 1.5          | 1.3        |
| 40.6        | 1.4          | 1.3        |
| 41.5        | 1.6          | 1.4        |
| 32.1        | 1.0          | 0.9        |
| 34.6        | 0.9          | 0.8        |
| 34.8        | 1.0          | 0.8        |
| 35.0        | 0.9          | 0.8        |
| 34.4        | 0.9          | 0.8        |
| 34.9        | 1.0          | 0.8        |
| 35.0        | 0.9          | 0.7        |
| 35.5        | 1.0          | 0.8        |
| 35.4        | 0.9          | 0.8        |
| 35.8        | 1.0          | 0.8        |
| 34.4        | 1.0          | 0.9        |
| 34.6        | 1.1          | 0.9        |
| 35.4        | 1.0          | 0.8        |
| 34.9        | 0.9          | 0.8        |

---

---

---

208Pb/232Th

---

| Age<br>(Ma) | 2 $\sigma^*$ | 2 $\sigma$ |
|-------------|--------------|------------|
| 35.0        | 1.0          | 0.8        |
| 35.1        | 1.0          | 0.8        |
| 35.0        | 1.0          | 0.9        |
| 35.6        | 1.0          | 0.9        |
| 34.3        | 1.0          | 0.8        |
| 35.2        | 1.0          | 0.8        |
| 35.6        | 1.1          | 1.0        |
| 35.4        | 1.0          | 0.9        |
| 35.2        | 1.0          | 0.9        |
| 35.0        | 1.0          | 0.8        |
| 36.2        | 1.0          | 0.8        |
| 35.1        | 0.9          | 0.8        |
| 35.1        | 1.0          | 0.8        |
| 36.0        | 1.0          | 0.9        |
| 35.2        | 1.0          | 0.9        |
| 35.6        | 1.1          | 0.9        |
| 36.1        | 1.0          | 0.9        |

---
