# Supplementary material for: A new calibrated strategy for the in situ U–Th–Pb dating of bastnasite by xenotime
Source: Royal Society of Chemistry journal article supplement (doi:10.1039/d2ja00233g), 2022-01-01
Supplement: d2ja00233g2.pdf [file d2ja00233g2.pdf]

### Supporting information

**Figure S-1** *In-situ* U–Pb ages of bastnasite K-9 calibrated by xenotime XN01 using a spot size of 24  $\mu\text{m}$  and without adding nitrogen.

**Figure S-2** *In-situ* U–Pb ages of bastnasite K-9 calibrated by xenotime XN01 using a spot size of 32  $\mu\text{m}$  and without adding nitrogen.

**Figure S-3** *In-situ* Th–Pb ages of bastnasite K-9 calibrated by xenotime XN01.

**Figure S-4** *In-situ* U–Pb ages of four typical bastnasite samples using K-9 as the primary standard in three normal ablation settings by LA-SF-ICP-MS.

**Figure S-5** *In-situ* Th–Pb ages of four typical bastnasite samples using K-9 as the primary standard in three normal ablation settings by LA-SF-ICP-MS.

**Table S-1** Mathematical equation for U–Pb data correction between standards and samples (xenotime XN01 or concordant bastnasite K-9 as the primary standard)..

**Table S-2** U–Th–Pb analytical results of K-9 calibrated by XN01.

**Table S-3** U–Th–Pb analytical results of four typical bastnasite samples calibrated by XN01.

**Table S-4** U–Th–Pb analytical results of four typical bastnasite samples calibrated by K-9.
